# Supplementary material
Source: PubMed Central journal article supplement (PMC8336604)
Supplement: NIHMS1687527-supplement-Suppl_Hohlman__et_al_2021.pdf [file NIHMS1687527-supplement-Suppl_Hohlman__et_al_2021.pdf]

## Supporting Information

### Structural diversification of hapalindole and fischerindole natural products via cascade biocatalysis

Robert M. Hohlman<sup>αβ</sup>, Sean A. Newmister<sup>α</sup>, Jacob N. Sanders<sup>Δ</sup>, Yogan Khatri<sup>α</sup>, Shasha Li<sup>αβ</sup>,  
Nikki R. Keramati<sup>α</sup>, Andrew N. Lowell<sup>α</sup>, K. N. Houk<sup>Δ</sup> and David H. Sherman<sup>αβ#\*</sup>

<sup>α</sup>Life Sciences Institute, <sup>β</sup>Department of Medicinal Chemistry, University of Michigan, Ann Arbor,  
Michigan

<sup>#</sup>Department of Microbiology & Immunology and Department of Chemistry, University of  
Michigan, Ann Arbor, Michigan

<sup>Δ</sup>Department of Chemistry and Biochemistry, University of California, Los Angeles, Los Angeles,  
California

\*Corresponding author Email: davidhs@umich.edu

## **Table of contents**

**S3-S4:** Table S1: Protein amino acid sequences  
**S5:** Table S2: Mutagenic primers  
**S6-S19:** Tables S3-S16: FamD2 TTN calculations  
**S20-S38:** Tables S17-S35: Hapalindole/Fischerindole characterization tables  
**S39-S40:** Tables S36-S37: Mutagenesis percent conversion tables  
**S41-S51:** Figures S1-S11: HpiC1→FimC5 mutagenesis HPLC traces  
**S52-S62:** Figures S12-S22: HpiC1→FamC1 mutagenesis HPLC traces  
**S63-S129:** Spectra section  
**S130-S143:** Tables S38-S44: Crystallographic data and parameters  
**S144-S152:** Computational Methods: Tables S45-S46  
**S153-S154:** References

**Table S1:** Protein amino acid sequence  
**Protein sequences**

**FamD2**

MNDVNRIRTDIINVAKTFGAEYSEKVLDEVFQVFGEQFADNSFMIRTSNKQPDKLGCFRYHEE  
DESQLGLAWDIARKSGLLSQGRPVDQLIPEICETFPIMADGVDFDVKHGLAKIWQSIKGVVPV  
QDAFKLSLPASVTTHSDFLKNHHLDALYAFGIDYHHSSVNLYFDYHPKHHTSEYYKNLLQDLQ  
FQPPSDELLELLTNGEIALTFNFASPRIERLCFYLPFLNREAVPQNLLNPLLKKYINEAPALVDN  
PGFILGWSFGPQQGKGTYYTKVDVDYHGRTVPLFMKVHSQPLPKAADFALAQ

**FamC1**

MKRKLIVAVVFLIFICLGINTPAHATSAVSIPINNAGFENPFMDVDDYDIDTPPGWTTYDPNNLV  
PEKRTTWTSNNGVGYVGPQTQFYNQLAPEGRNIGYIYLSQNPQSGVAGFEQILDATLEPDTKY  
TLTVDVGNLAGTFKGLSFAGFPGYRVELLAGDVLAAADHNNLFIKEGEFKTSTVYTTSTAKDLHL  
GQKLGIRLVNLLQDKFSGLDLFDNVRLTTEPTET

**FimC5**

MKRNFIIAAIVLLVYIFSGINVFANAASAVCIPIKNAGFEPIEQIEDDYDIDTPPGWITYDPGGLVP  
AKRTRITSNNGVGYTGSNSEFYNHKAPEGRNVAFVYLAQEIGSGIAGLEQTLDAVLKPNTKYTL  
TVDIGNSGGSFQGKTLDGFPGYRIELLAGDVLAAADHNTLYIKEKDFKSTTVTFTATPESPYLGO  
HLGIRLINPLQGKFSGVDFDNVRLTAEP AET

**HpiC1**

MGSSHHHHHHSSGLVPRGSHMASTSVSIPINNAGFEDPFIEVVDDYTVDTPPGWTTYNPNNL  
VPEKRTTWTSNNGVGYVGPQTQFYNQLAPEGRNIGYIYLAQKPGSGVAGFEQILDATLEPDTK  
YTLKVDVGNFSGGEFQKISLAGFPGYRVELLAGDVLAAADHNNLYIKDGEFKTSTVFTATPDNP  
YLDQKLGIRLINLLQGTFSGLDLFDNVRLTVEPAQT

**HpiC1\_Y101F**

MGSSHHHHHHSSGLVPRGSHMASTSVSIPINNAGFEDPFIEVVDDYTVDTPPGWTTYNPNNL  
VPEKRTTWTSNNGVGYVGPQTQFYNQLAPEGRNIGFIYLAQKPGSGVAGFEQILDATLEPDTK  
YTLKVDVGNFSGGEFQKISLAGFPGYRVELLAGDVLAAADHNNLYIKDGEFKTSTVFTATPDNP  
YLDQKLGIRLINLLQGTFSGLDLFDNVRLTVEPAQT

**HpiC1\_F138S**

MGSSHHHHHHSSGLVPRGSHMASTSVSIPINNAGFEDPFIEVVDDYTVDTPPGWTTYNPNNL  
VPEKRTTWTSNNGVGYVGPQTQFYNQLAPEGRNIGYIYLAQKPGSGVAGFEQILDATLEPDTK  
YTLKVDVGNFSGGEFQKISLAGFPGYRVELLAGDVLAAADHNNLYIKDGEFKTSTVFTATPDNP  
YLDQKLGIRLINLLQGTFSGLDLFDNVRLTVEPAQT

**HpiC1\_Y101FF138S**

MGSSHHHHHHSSGLVPRGSHMASTSVSIPINNAGFEDPFIEVVDDYTVDTPPGWTTYNPNNL  
VPEKRTTWTSNNGVGYVGPQTQFYNQLAPEGRNIGFIYLAQKPGSGVAGFEQILDATLEPDTK  
YTLKVDVGNFSGGEFQKISLAGFPGYRVELLAGDVLAAADHNNLYIKDGEFKTSTVFTATPDNP  
YLDQKLGIRLINLLQGTFSGLDLFDNVRLTVEPAQT

**HpiC1\_L147F**

MGSSHHHHHHSSGLVPRGSHMASTSVSIPINNAGFEDPFIEVVDDYTVDTPPGWTTYNPNNL  
VPEKRTTWTSNNGVGYVGPQTQFYNQLAPEGRNIGYIYLAQKPGSGVAGFEQILDATLEPDTK

YTLKVDVGNFGGEFQKISFAGFPGYRVELLAGDTVLAADHNNLYIKDGEFKTSTVTFTATPDNP  
YLDQKLGIRLINLLQGTFSGLDFDNVRLTVEPAQT

**HpiC1\_F138L**

MGSSHHHHHHSSGLVPRGSHMASTSVVSIPINNAGFEDPFIEVVDDYTVDTPPGWTTYNPNNL  
VPEKRTTWTSNNGVGYVGPQTQFYNQLAPEGRNIGYIYLAQKPGSGVAGFEQILDATLEPDTK  
YTLKVDVGNLGGGEFQKISLAGFPGYRVELLAGDTVLAADHNNLYIKDGEFKTSTVTFTATPDNP  
YLDQKLGIRLINLLQGTFSGLDFDNVRLTVEPAQT

**HpiC1\_V51I**

MGSSHHHHHHSSGLVPRGSHMASTSVVSIPINNAGFEDPFIEVVDDYTIDTPPGWTTYNPNNL  
VPEKRTTWTSNNGVGYVGPQTQFYNQLAPEGRNIGYIYLAQKPGSGVAGFEQILDATLEPDTK  
YTLKVDVGNFGGEFQKISLAGFPGYRVELLAGDTVLAADHNNLYIKDGEFKTSTVTFTATPDNP  
YLDQKLGIRLINLLQGTFSGLDFDNVRLTVEPAQT

**HpiC1\_L147FF138L**

MGSSHHHHHHSSGLVPRGSHMASTSVVSIPINNAGFEDPFIEVVDDYTVDTPPGWTTYNPNNL  
VPEKRTTWTSNNGVGYVGPQTQFYNQLAPEGRNIGYIYLAQKPGSGVAGFEQILDATLEPDTK  
YTLKVDVGNLGGGEFQKISFAGFPGYRVELLAGDTVLAADHNNLYIKDGEFKTSTVTFTATPDNP  
YLDQKLGIRLINLLQGTFSGLDFDNVRLTVEPAQT

**Table S2: Mutagenic primers (5'→3')**

|                 |                                                     |
|-----------------|-----------------------------------------------------|
| SN_HpiC1_F138S  | CCCTGAAAGTGGACGTTGGTAACtctGGTGGCGAGTTTCAGAAAATTAGCC |
| SN_HpiC1_Y101F  | CGCCGGAAGGTCGTAACATCGGCttcATTTATCTGGCGCAGAACCGGG    |
| RMH_HpiC1_F138L | CACCCTGAAAGTGGACGTTGGTAACctgGGTGGCGAGTTTCAG         |
| RMH_HpiC1_L147F | GGTGGCGAGTTTCAGAAAATTAGCtttGCGGGTTTTCCGGGCTACCG     |
| RMH_HpiC1_V51I  | CGAAGTGGTTGACGATTACACCattGATACCCCGCCGGGTTGGAC       |

**Tables S3-S15: FamD2 TTN calculations (Compound #'s given)**

All TTN values were calculated by using (#mol substrate consumed/#mol of enzyme). Each starting concentration was 2 mM substrate and 1 μM FamD2 (1:2000 ratio) for 1 hour

Note: Molarity absorptivity of 3-GC and 2-GC intermediates is much lower than starting material at 280 nm.

**Table S3: FamD2 TTN calculations for 1**

Datafile Name:44\_Isonitrile\_3\_044.lcd  
Sample Name:Isonitrile\_3  
Sample ID:Isonitrile\_3

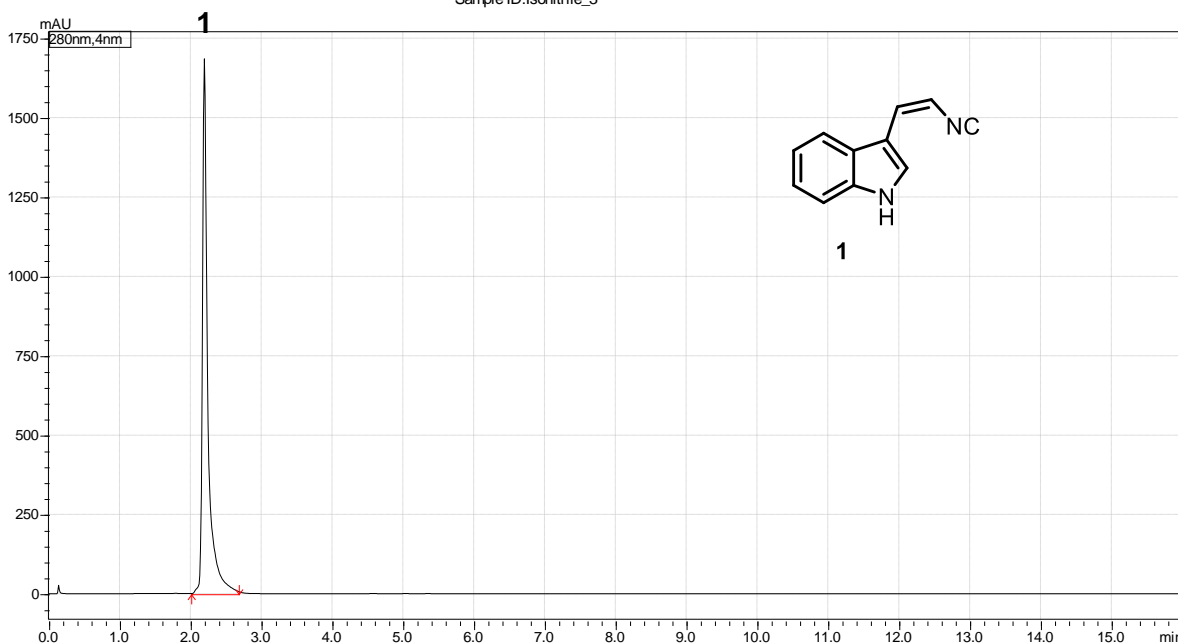

| Peak# | Ret. Time (min) | Area    | Height  |
|-------|-----------------|---------|---------|
| 1     | 2.199           | 8894557 | 1685057 |

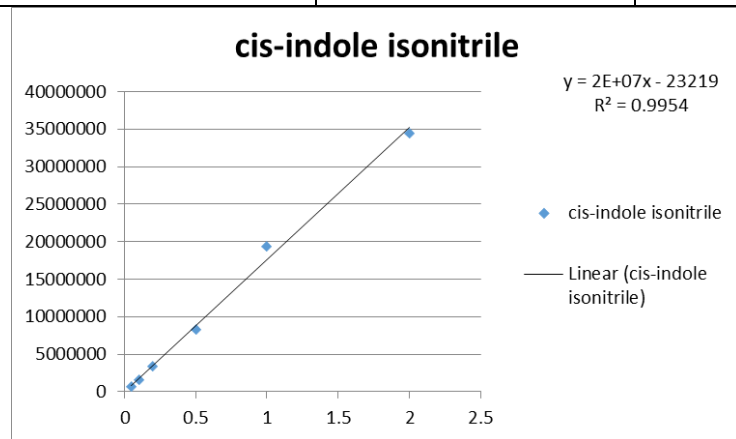

| Concentration (mM) | Peak Area |
|--------------------|-----------|
| 0.05               | 653893    |
| 0.1                | 1554188   |
| 0.2                | 3331471   |
| 0.5                | 8326797   |
| 1                  | 19411897  |
| 2                  | 34535180  |

Eq: Area=17650000C-23219  
 $TTN = (2 - ((8894557 + 23219) / 17650000)) * 1000$   
 TTN=1495

**Table S4: FamD2 TTN calculations for 6**

Datafile Name:4\_5\_OBzn\_3\_004.lcd  
 Sample Name:5\_OBzn\_3  
 Sample ID:5\_OBzn\_3

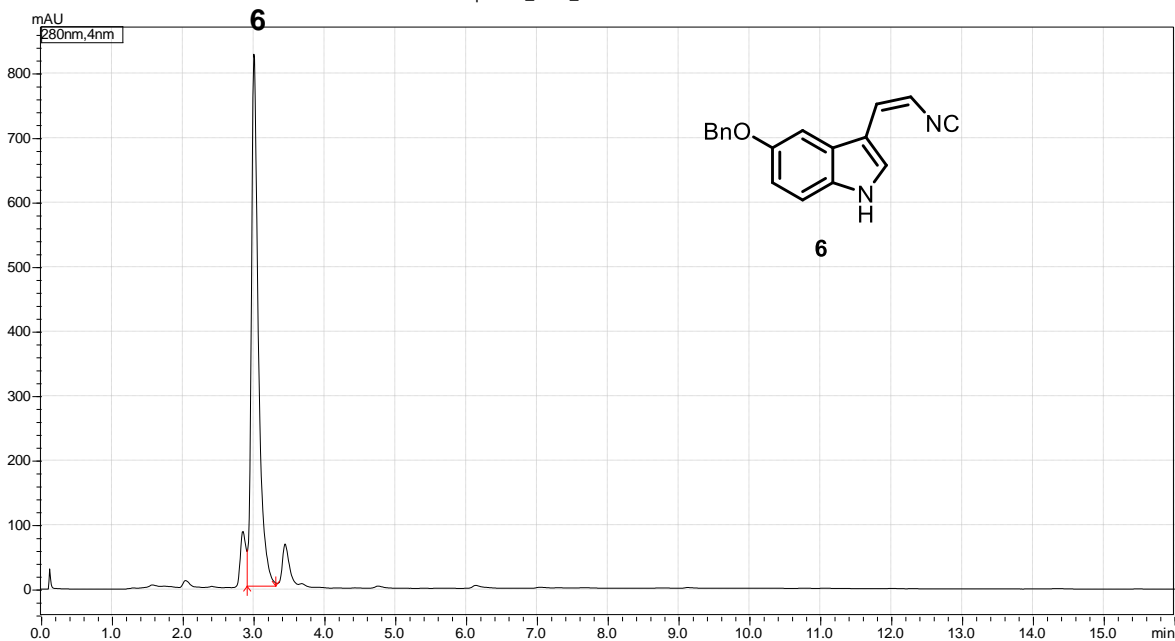

| Peak# | Ret. Time (min) | Area    | Height |
|-------|-----------------|---------|--------|
| 6     | 3.012           | 5643864 | 823270 |

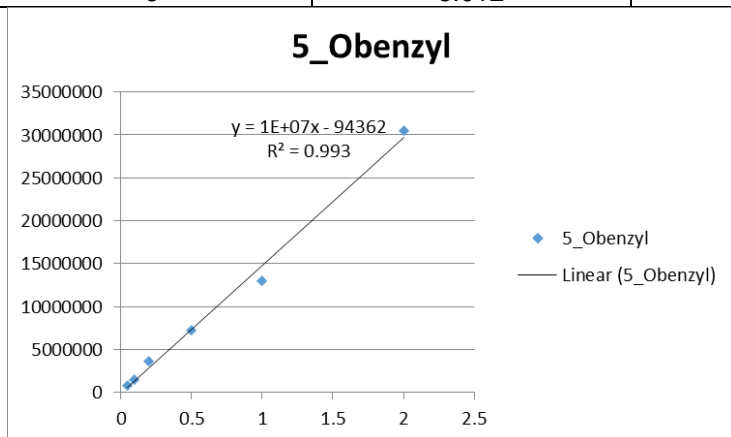

| Concentration (mM)                    | Peak Area |
|---------------------------------------|-----------|
| 0.05                                  | 845526    |
| 0.1                                   | 1552167   |
| 0.2                                   | 3612819   |
| 0.5                                   | 7210308   |
| 1                                     | 13033420  |
| 2                                     | 30538409  |
| Eq: Area=14898000C-94361              |           |
| TTN=(2-(5643864+94361)/14898000)*1000 |           |
| TTN=1615                              |           |

**Table S5:** FamD2 TTN calculations for **8**

Datafile Name: 7\_5\_OMe\_3\_007.lcd  
 Sample Name: 5\_OMe\_3  
 Sample ID: 5\_OMe\_3

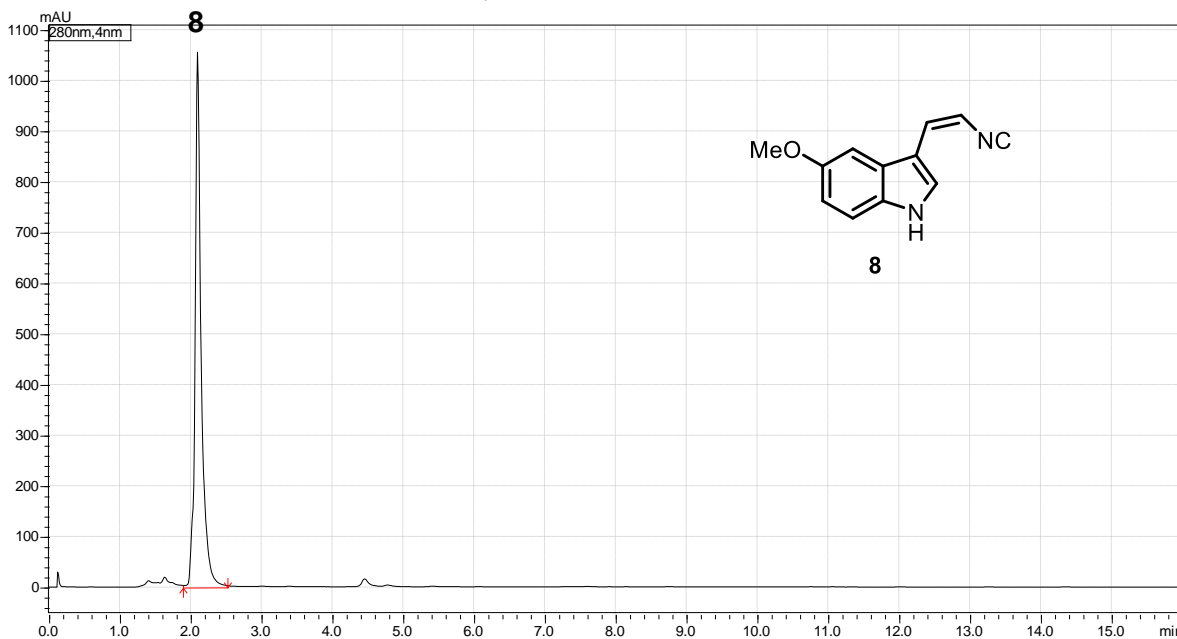

| Peak# | Ret. Time (min) | Area    | Height  |
|-------|-----------------|---------|---------|
| 8     | 2.103           | 6345503 | 1055592 |

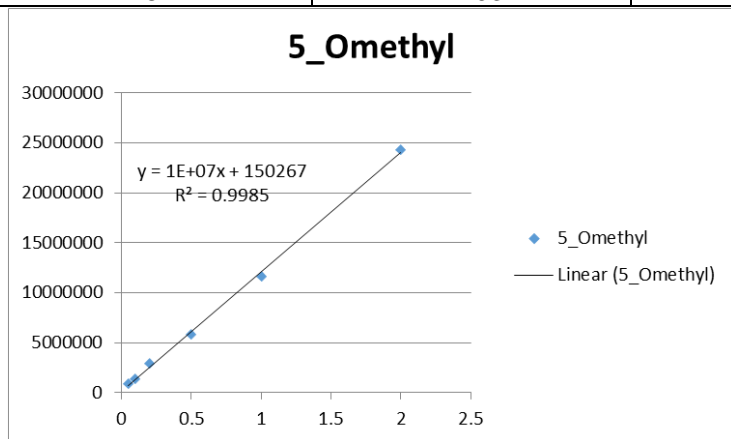

| Concentration (mM) | Peak Area |
|--------------------|-----------|
| 0.05               | 880751    |
| 0.1                | 1350825   |
| 0.2                | 2934652   |
| 0.5                | 5795652   |
| 1                  | 11602799  |
| 2                  | 24324966  |

Eq: Area=11945000C+150267  
 TTN=(2-(6345503-150267)/11945000)\*1000  
 TTN=1481



**Table S6:** FamD2 TTN calculations for **9**

Datafile Name: 9\_6\_OMe\_2\_009.lcd  
 Sample Name: 6\_OMe\_2  
 Sample ID: 6\_OMe\_2

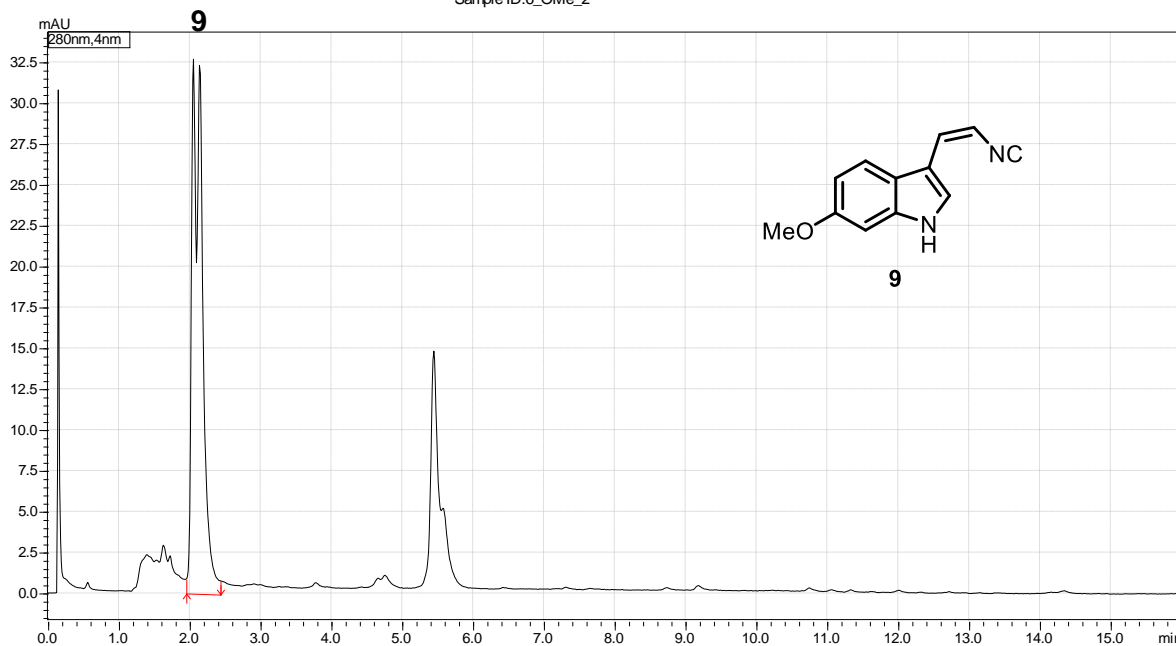

| Peak# | Ret. Time (min) | Area   | Height |
|-------|-----------------|--------|--------|
| 9     | 2.057           | 339537 | 32684  |

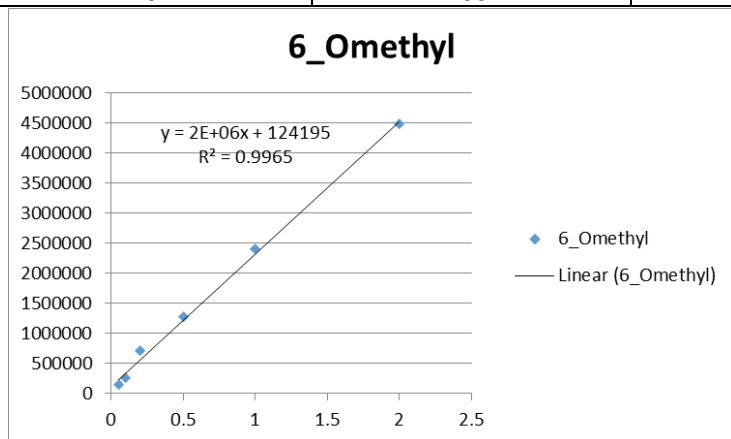

| Concentration (mM) | Peak Area |
|--------------------|-----------|
| 0.05               | 126960    |
| 0.1                | 250899    |
| 0.2                | 702230    |
| 0.5                | 1269780   |
| 1                  | 2384291   |
| 2                  | 4465861   |

Eq: Area=2196100C+124195  
 TTN=(2-(339537-124196)/2196100)\*1000  
 TTN=1902

**Table S7: FamD2 TTN calculations for 10**

Datafile Name:11\_5\_Cl\_1\_011.lcd  
 Sample Name:5\_Cl\_1  
 Sample ID:5\_Cl\_1

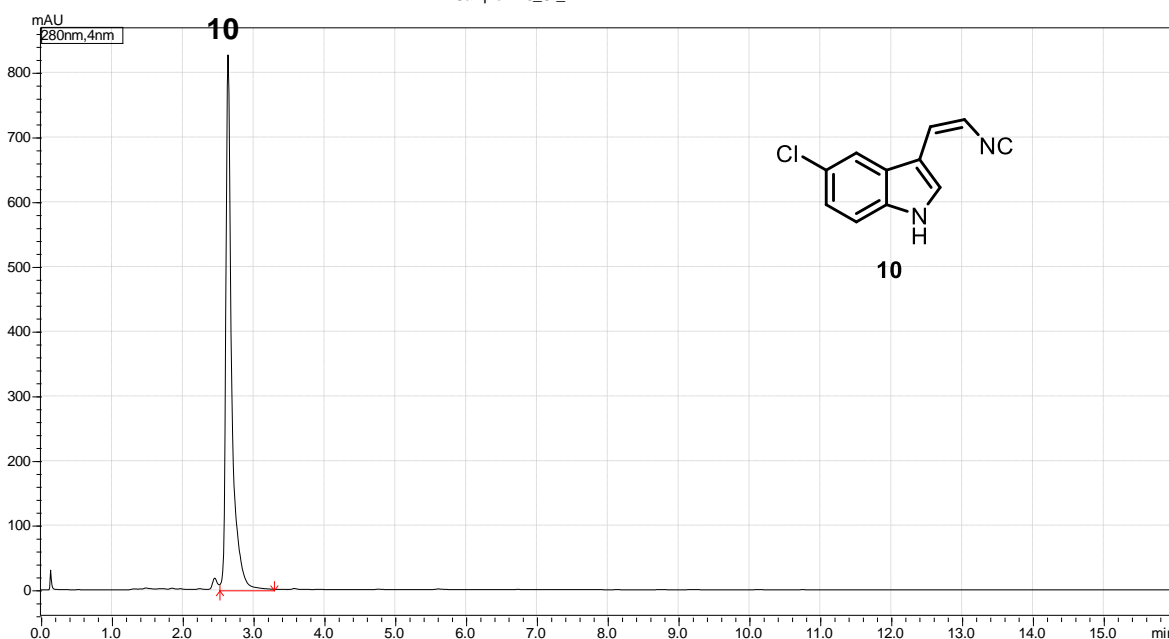

| Peak# | Ret. Time (min) | Area    | Height |
|-------|-----------------|---------|--------|
| 10    | 2.645           | 4768339 | 827062 |

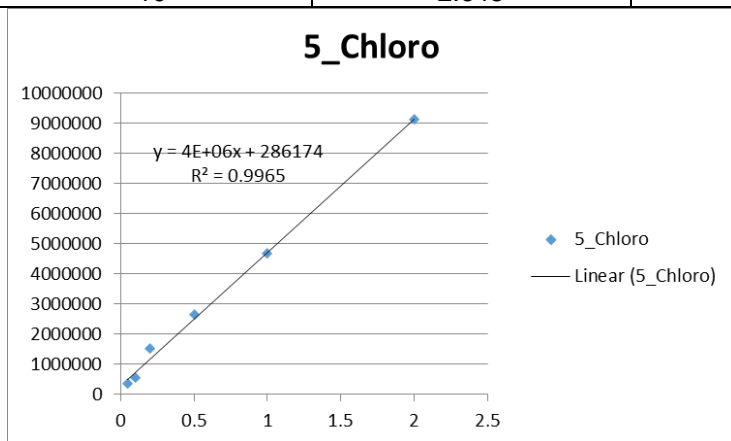

| Concentration (mM) | Peak Area |
|--------------------|-----------|
| 0.05               | 338062    |
| 0.1                | 521558    |
| 0.2                | 1488020   |
| 0.5                | 2633172   |
| 1                  | 4663983   |
| 2                  | 9110272   |

Eq:  $\text{Area} = 4254600C + 286174$   
 $\text{TTN} = (2 - (4768339 - 286175) / 4254600) * 1000$   
 TTN=947

**Table S8: FamD2 TTN calculations for 11**

Datafile Name:16\_6\_Cl\_3\_016.lcd  
 Sample Name:6\_Cl\_3  
 Sample ID:6\_Cl\_3

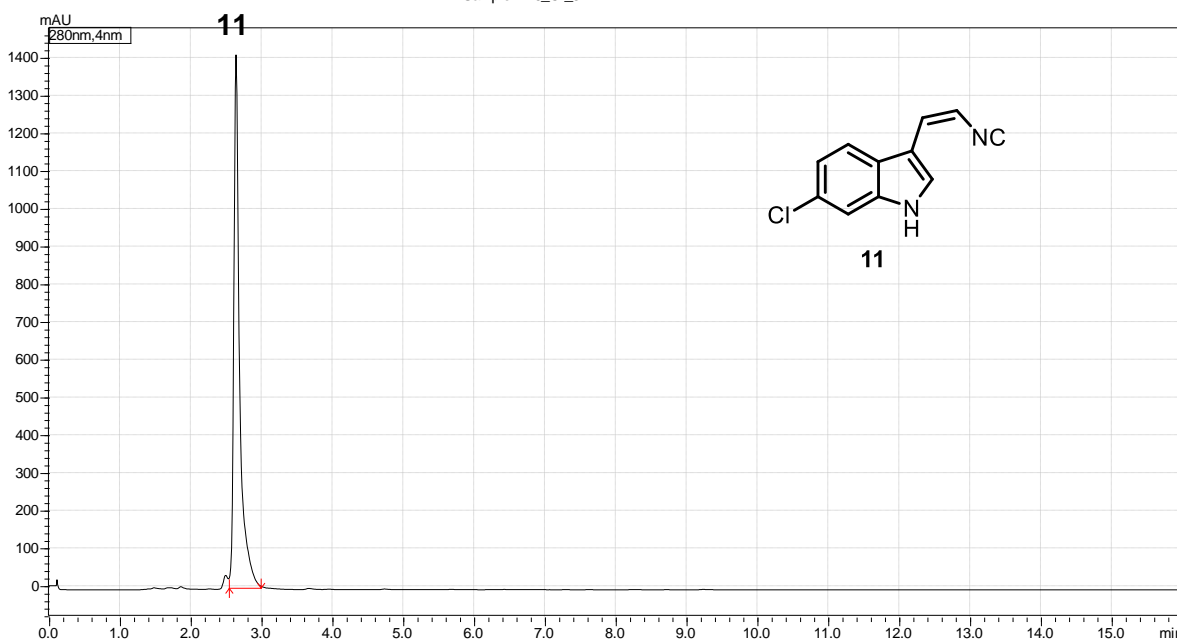

| Peak# | Ret. Time (min) | Area    | Height  |
|-------|-----------------|---------|---------|
| 11    | 2.645           | 8018316 | 1411263 |

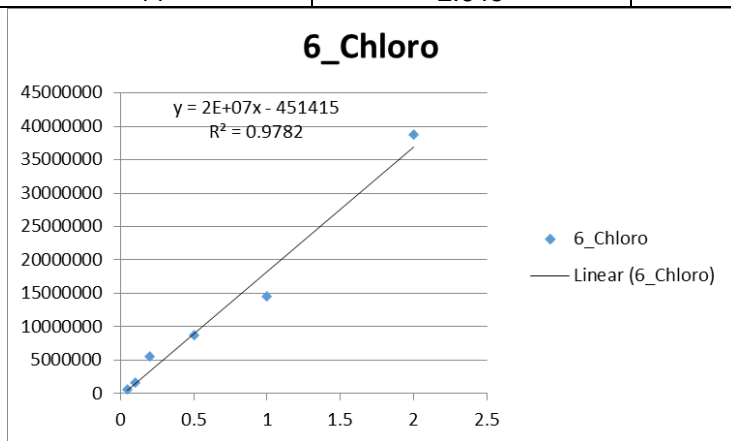

| Concentration (mM) | Peak Area |
|--------------------|-----------|
| 0.05               | 550712    |
| 0.1                | 1523935   |
| 0.2                | 5421020   |
| 0.5                | 8628390   |
| 1                  | 14447101  |
| 2                  | 38655405  |

Eq: Area=18684000C-451415  
 TTN=(2-(8018316+451415)/18684000)\*1000  
 TTN=1547

**Table S9: FamD2 TTN calculations for 12**

Datefile Name:36\_5\_F\_1\_036.lcd  
 Sample Name:5\_F\_1  
 Sample ID:5\_F\_1

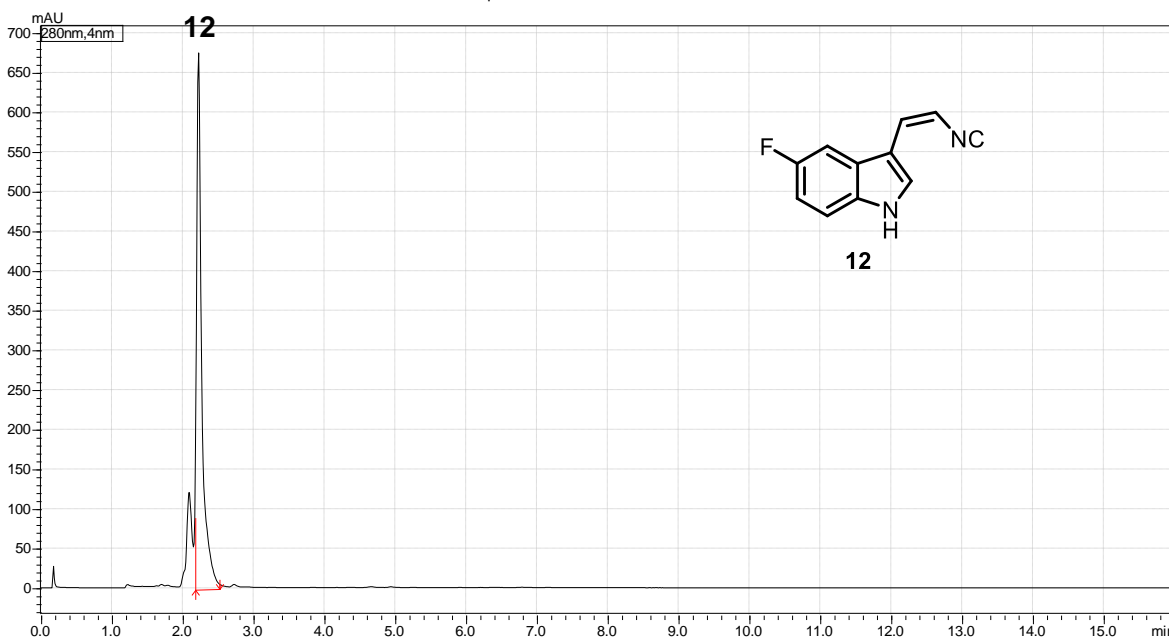

| Peak# | Ret. Time (min) | Area    | Height |
|-------|-----------------|---------|--------|
| 12    | 2.228           | 3450687 | 676146 |

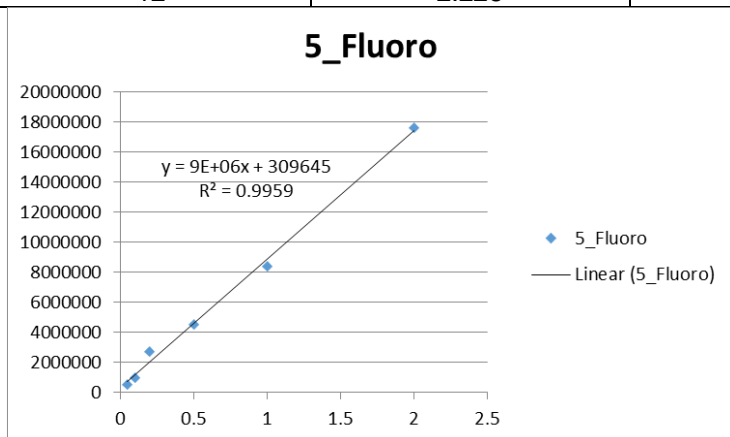

| Concentration (mM)                     | Peak Area |
|----------------------------------------|-----------|
| 0.05                                   | 524363    |
| 0.1                                    | 998106    |
| 0.2                                    | 2736403   |
| 0.5                                    | 4522171   |
| 1                                      | 8384625   |
| 2                                      | 17593782  |
| Eq: Area=8372900C+309645               |           |
| TTN=(2-(3450687-309645)/8372900))*1000 |           |
| TTN=1625                               |           |

**Table S10: FamD2 TTN calculations for 13**

Datefile Name:22\_6\_F\_3\_022.lcd  
 Sample Name:6\_F\_3  
 Sample ID:6\_F\_3

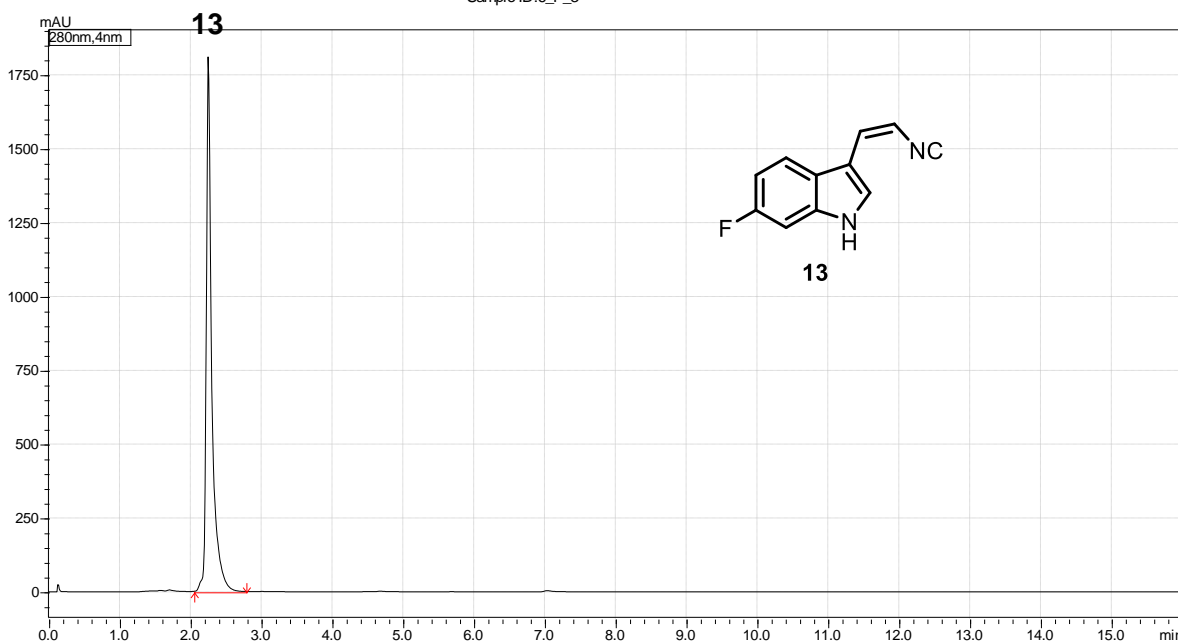

| Peak# | Ret. Time (min) | Area    | Height  |
|-------|-----------------|---------|---------|
| 13    | 2.254           | 9844920 | 1810594 |

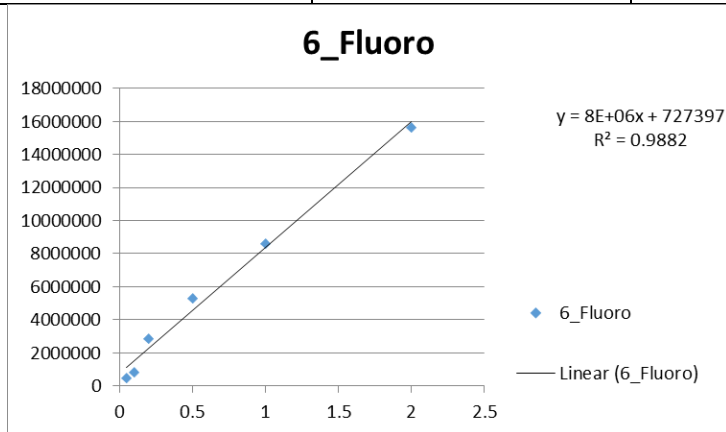

| Concentration (mM)                     | Peak Area |
|----------------------------------------|-----------|
| 0.05                                   | 463672    |
| 0.1                                    | 833895    |
| 0.2                                    | 2879462   |
| 0.5                                    | 5292420   |
| 1                                      | 8583214   |
| 2                                      | 15642615  |
| Eq: Area=7618400C+727397               |           |
| TTN=(2-(98944920-727397)/7618400)*1000 |           |
| TTN=803                                |           |

**Table S11: FamD2 TTN calculations for 14**

Datafile Name:26\_5\_Br\_3\_026.lcd  
 Sample Name:5\_Br\_3  
 Sample ID:5\_Br\_3

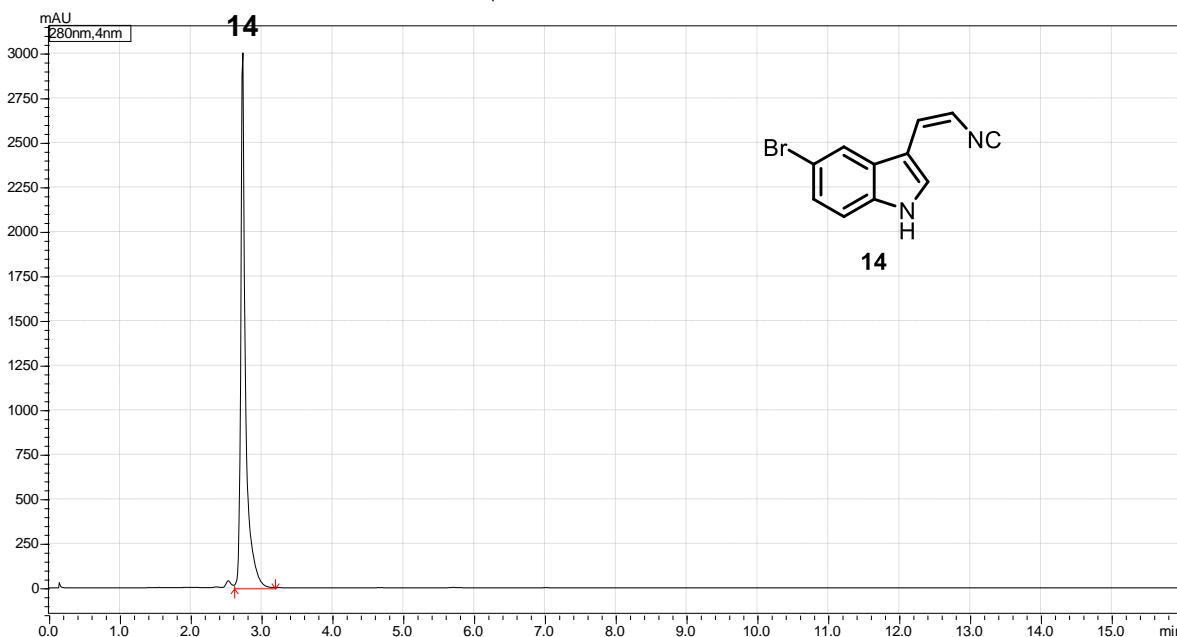

| Peak# | Ret. Time (min) | Area     | Height  |
|-------|-----------------|----------|---------|
| 14    | 2.738           | 13892693 | 3002168 |

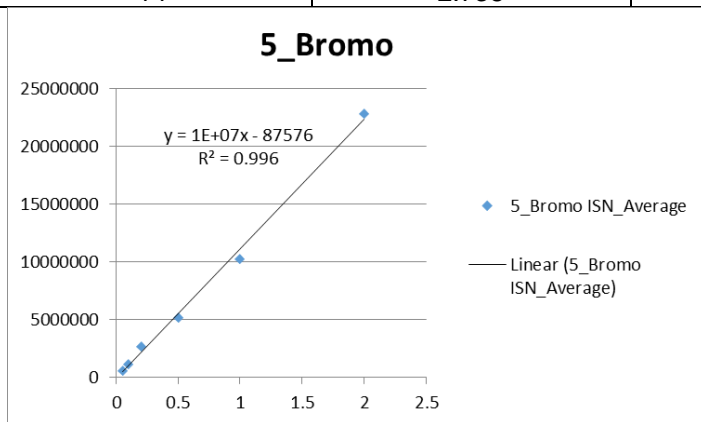

| Concentration (mM) | Peak Area |
|--------------------|-----------|
| 0.05               | 574234    |
| 0.1                | 1172302   |
| 0.2                | 2680616   |
| 0.5                | 5195618   |
| 1                  | 10238688  |
| 2                  | 22839230  |

Eq: Area=11228000C-97576  
 TTN=(2-(13892693+97576)/11228000))\*1000  
 TTN=755

**Table S12: FamD2 TTN calculations for 15**

Datafile Name:29\_6\_Br\_3\_029.lcd  
 Sample Name:6\_Br\_3  
 Sample ID:6\_Br\_3

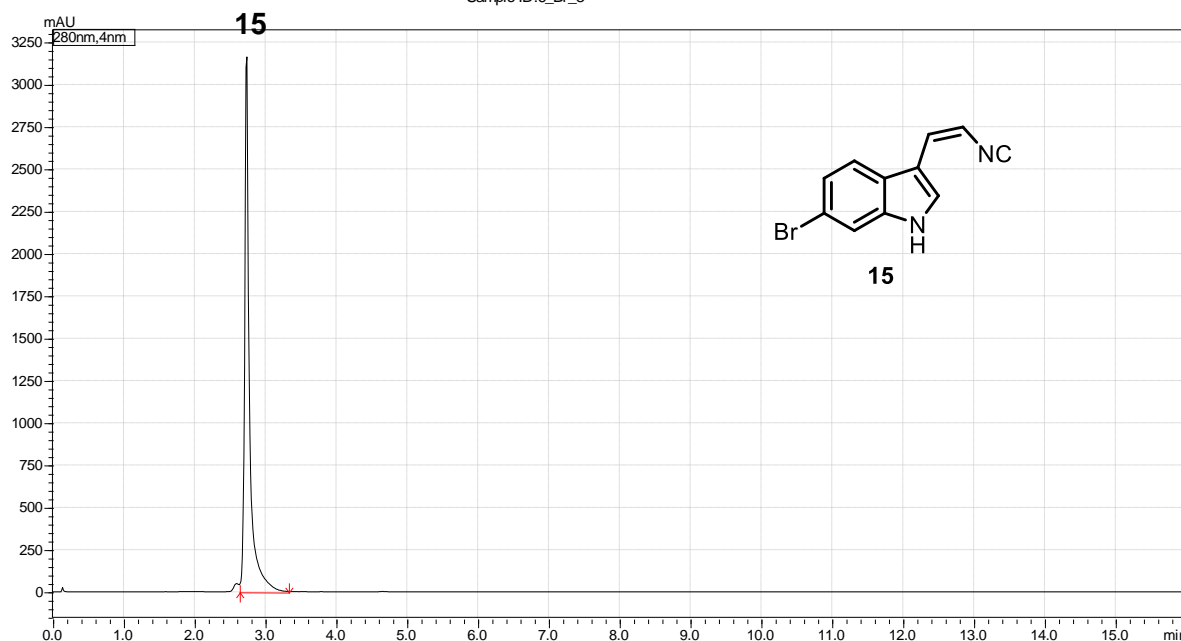

| Peak# | Ret. Time (min) | Area     | Height  |
|-------|-----------------|----------|---------|
| 15    | 2.737           | 14992583 | 3162897 |

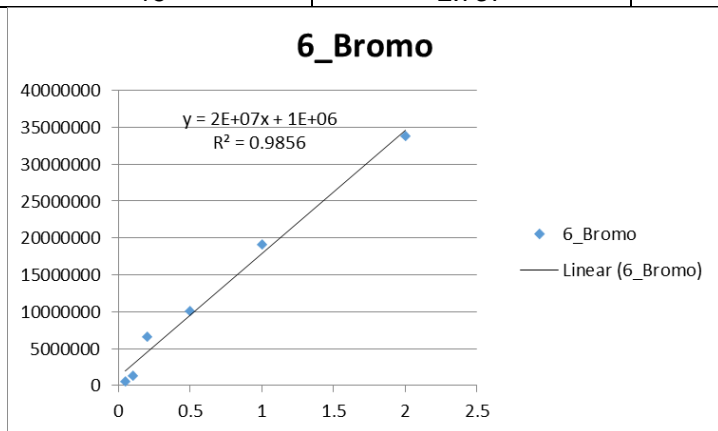

| Concentration (mM) | Peak Area |
|--------------------|-----------|
| 0.05               | 523053    |
| 0.1                | 1281699   |
| 0.2                | 6598523   |
| 0.5                | 10125820  |
| 1                  | 19156883  |
| 2                  | 33784053  |

Eq: Area=16737000C+1171800  
 TTN=(2-(14992583-1171800)/16737000))\*1000  
 TTN=1174

**Table S13: FamD2 TTN calculations for 16**

Datafile Name: 0\_10\_Rxn1\_5\_I\_FamD2\_2mM\_2\_010.lcd  
 Sample Name: Rxn1\_5\_I\_FamD2\_2mM\_2  
 Sample ID: Rxn1\_5\_I\_FamD2\_2mM\_2

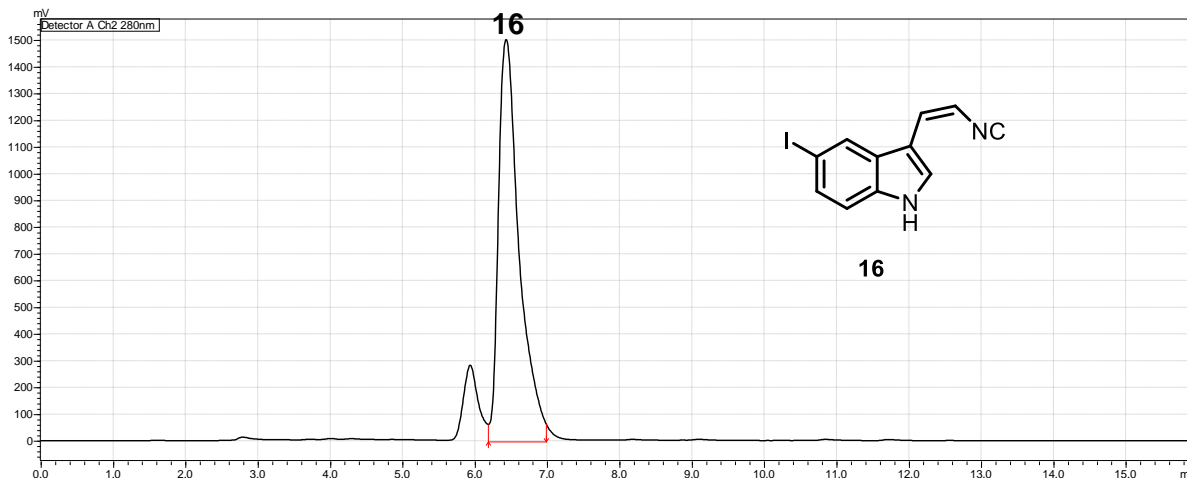

| Peak# | Ret. Time (min) | Area     | Height  |
|-------|-----------------|----------|---------|
| 16    | 6.435 (1mL/min) | 29908556 | 1519361 |

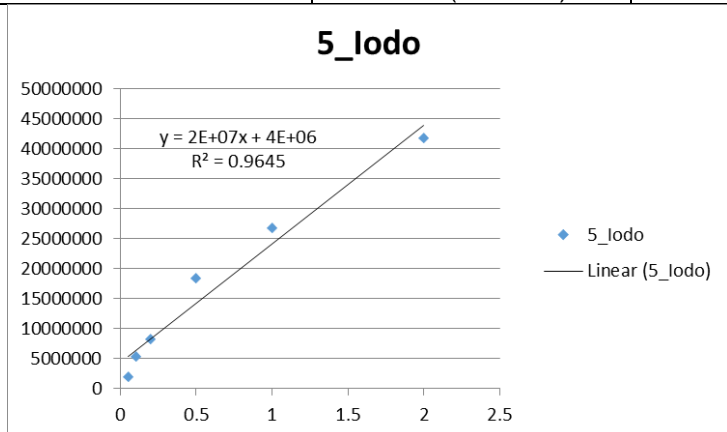

| Concentration (mM)                       | Peak Area |
|------------------------------------------|-----------|
| 0.05                                     | 2021327   |
| 0.1                                      | 5413201   |
| 0.2                                      | 8326473   |
| 0.5                                      | 18357085  |
| 1                                        | 26803087  |
| 2                                        | 41734933  |
| Eq: Area=19734000C+4446700               |           |
| TTN=(2-(29908566-4446700)/19734000)*1000 |           |
| TTN=710                                  |           |



**Table S14: FamD2 TTN calculations for 17**

Datafile Name:32\_7\_Aza\_3\_032.lcd  
 Sample Name:7\_Aza\_3  
 Sample ID:7\_Aza\_3

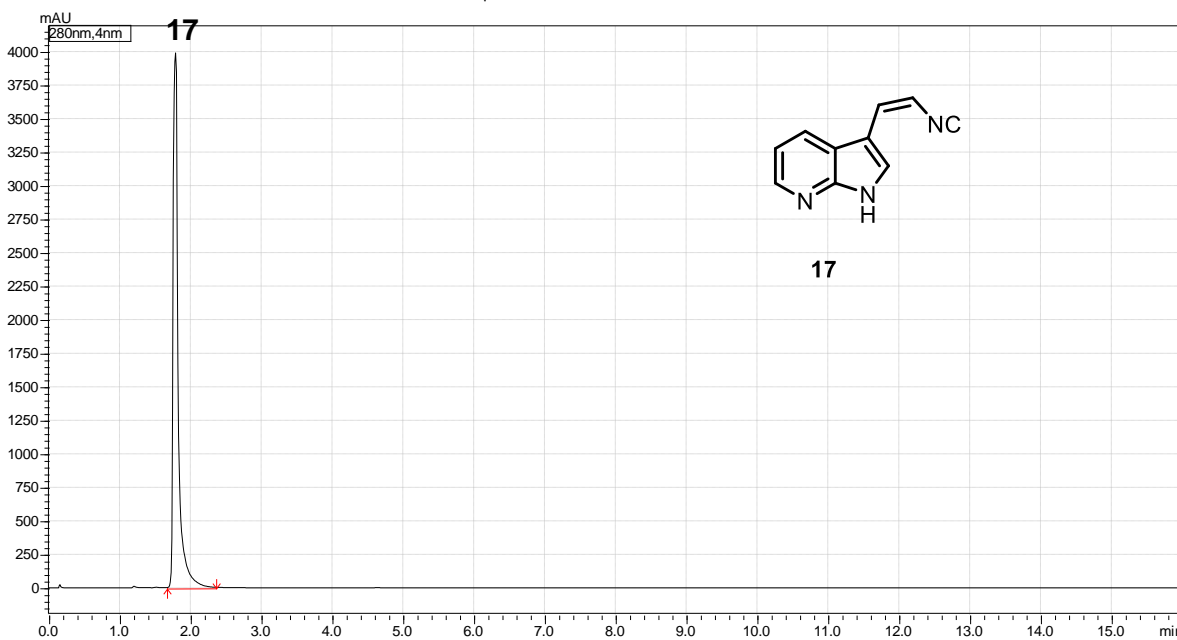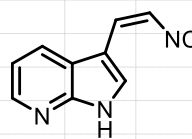

**17**

| Peak# | Ret. Time (min) | Area     | Height  |
|-------|-----------------|----------|---------|
| 17    | 1.790           | 20093276 | 3989928 |

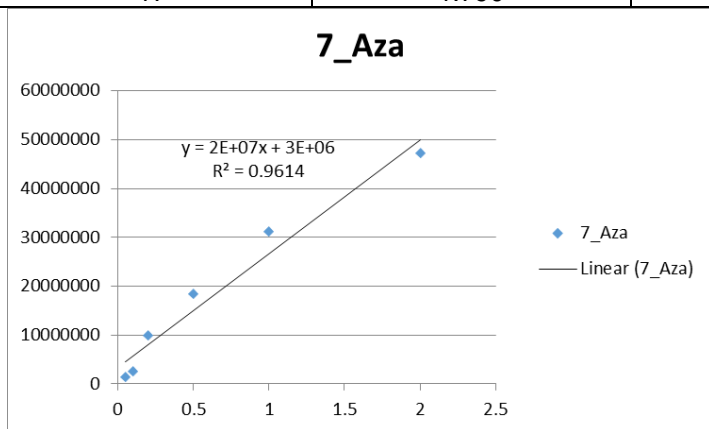

| Concentration (mM) | Peak Area |
|--------------------|-----------|
| 0.05               | 1258424   |
| 0.1                | 2439309   |
| 0.2                | 9730293   |
| 0.5                | 18168987  |
| 1                  | 31076307  |
| 2                  | 47068189  |

Eq: Area=23351000C+3306500  
 TTN=(2-(20093276-3306500)/23351000)\*1000  
 TTN=1281

**Table S15: FamD2 TTN calculations for 18**

Datafile Name: 18\_5\_F\_7\_Aza\_2\_018.lcd  
 Sample Name: 5\_F\_7\_Aza\_2  
 Sample ID: 5\_F\_7\_Aza\_2

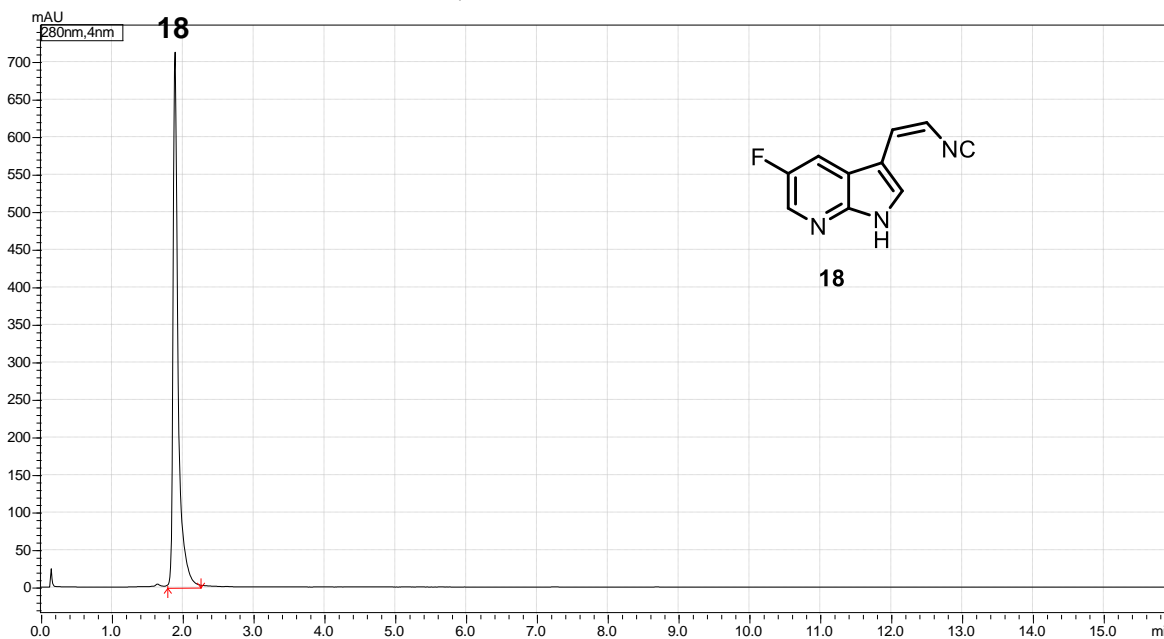

| Peak# | Ret. Time (min) | Area    | Height |
|-------|-----------------|---------|--------|
| 18    | 1.896           | 3530558 | 712821 |

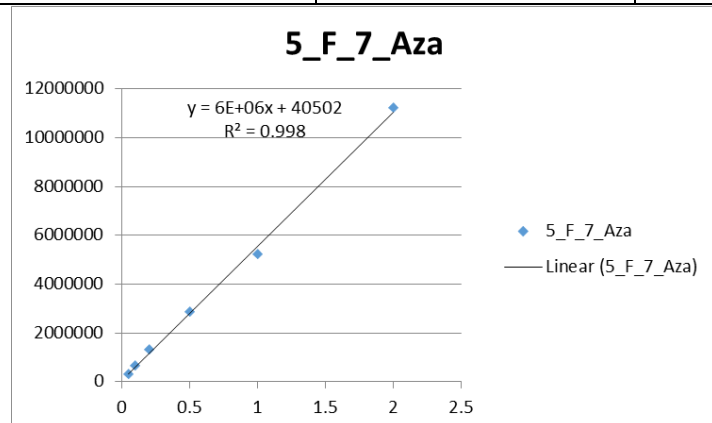

| Concentration (mM) | Peak Area |
|--------------------|-----------|
| 0.05               | 283081    |
| 0.1                | 645116    |
| 0.2                | 1286867   |
| 0.5                | 2826221   |
| 1                  | 5191694   |
| 2                  | 11199120  |

Eq: Area=5503700C+40502  
 TTN=(2-(3530558-40502)/5503700)\*1000  
 TTN=1366

**Table S16: FamD2 TTN calculations for 19**

Datafile Name:39\_Nitrile\_1\_039.lcd  
 Sample Name:Nitrile\_1  
 Sample ID:Nitrile\_1

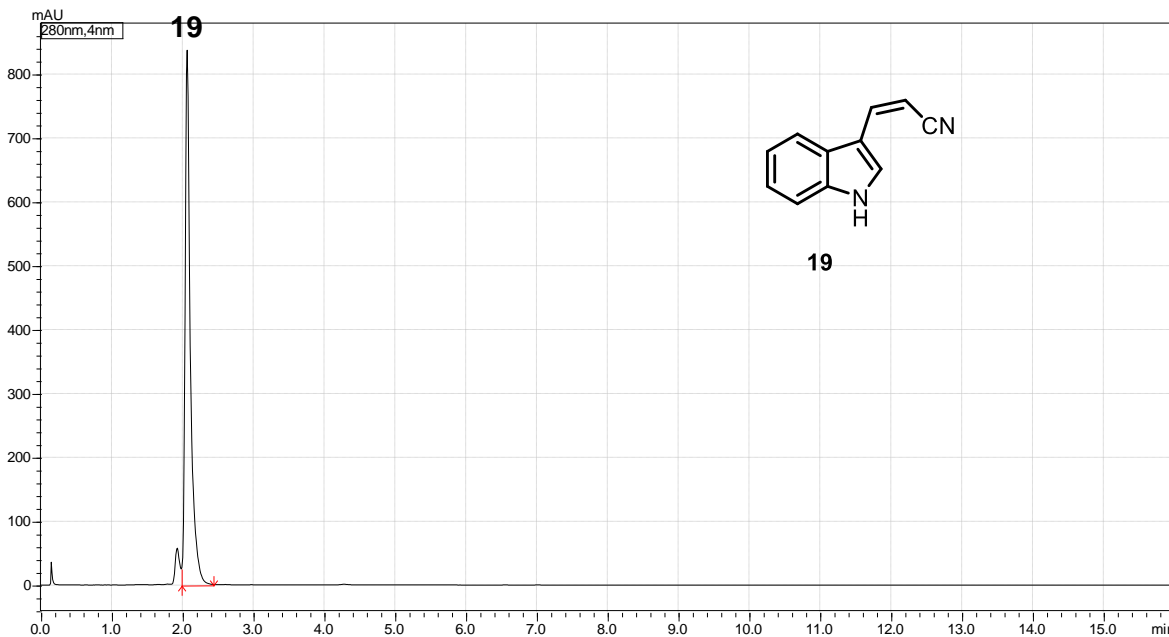

| Peak# | Ret. Time (min) | Area    | Height |
|-------|-----------------|---------|--------|
| 19    | 2.068           | 4373769 | 837043 |

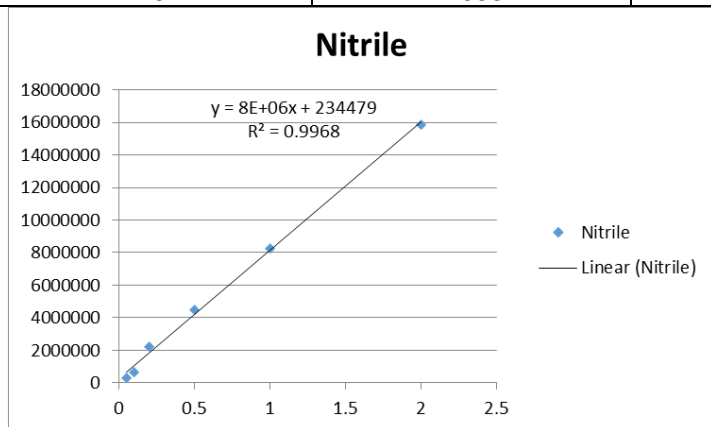

| Concentration (mM)                     | Peak Area |
|----------------------------------------|-----------|
| 0.05                                   | 326968    |
| 0.1                                    | 628233    |
| 0.2                                    | 2231327   |
| 0.5                                    | 4492460   |
| 1                                      | 8254223   |
| 2                                      | 15871448  |
| Eq: Area=7579000C+234479               |           |
| TTN=(2-(4373769-234479)/7579000))*1000 |           |
| TTN=1454                               |           |

## Characterization Tables (Tables S17-S35)

### 12-*epi*-Hapalindole U Derivatives

#### Table S17: 5-Fluoro-12-*epi*-Hapalindole U (22)

Full characterization data<sup>1</sup>

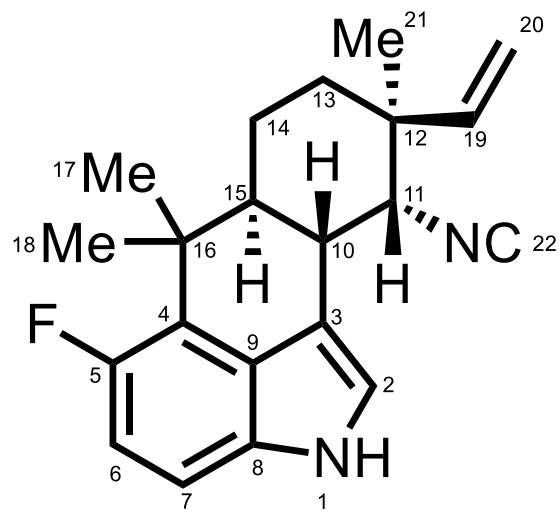

**Table S18: 6-Fluoro-12-*epi*-Hapalindole U (23)**  
Full characterization data<sup>1</sup>

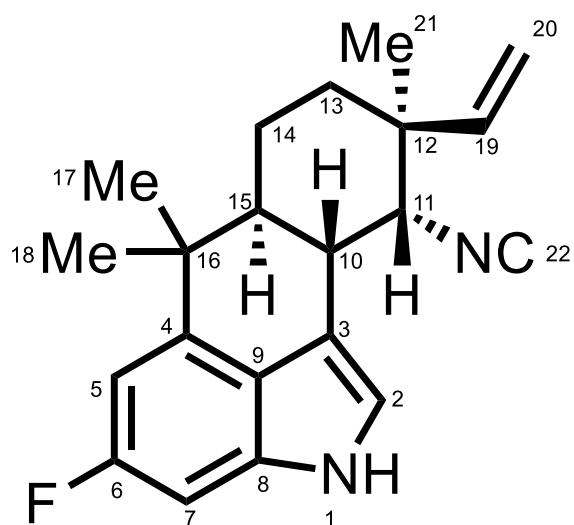

**Table S19: 5-Bromo-12-*epi*-Hapalindole U (26)**  
 $[\alpha]_D^{25} = +10.5$  (c=0.15, CH<sub>2</sub>Cl<sub>2</sub>)

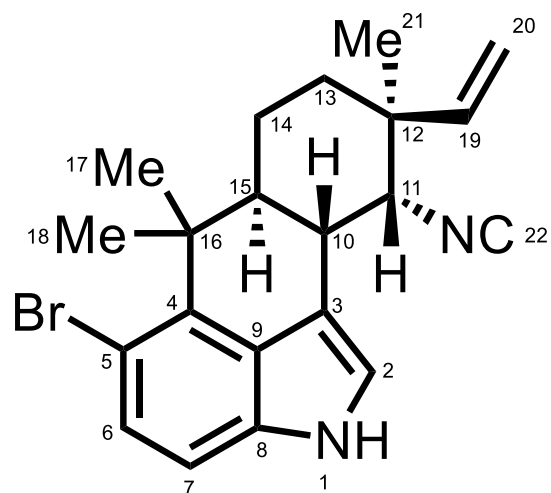

| Position | <sup>13</sup> C shift (ppm) | <sup>1</sup> H shift (ppm),<br>multi (J)            | COSY  | HMBC                   |
|----------|-----------------------------|-----------------------------------------------------|-------|------------------------|
| 1        |                             | 6.53, bs                                            |       |                        |
| 2        | 117.00                      | 6.26, t, (2.0)                                      | 10    | 3,8,9                  |
| 3        | 113.74                      |                                                     |       |                        |
| 4        | 137.84                      |                                                     |       |                        |
| 5        | 110.12                      |                                                     |       |                        |
| 6        | 130.05                      | 7.52, d, (8.5)                                      | 7     | 4,5,8                  |
| 7        | 110.62                      | 6.59, d, (8.5)                                      | 6     | 5,9                    |
| 8        | 133.68                      |                                                     |       |                        |
| 9        | 127.61                      |                                                     |       |                        |
| 10       | 34.00                       | 2.83, d, (11.8)                                     | 11,15 | 3,15                   |
| 11       | 63.18                       | 3.88, s                                             | 10,14 | 3,10,12,14,15,16,19,22 |
| 12       | 39.66                       |                                                     |       |                        |
| 13       | 22.10                       | 1.48, dd, (13.1,<br>3.6) & 1.29, td,<br>(13.0, 3.5) | 14    | 15,17,21               |
| 14       | 31.49                       | 1.65, td, (13.9,<br>3.9) & 1.42, d,<br>(14.2)       | 13    | 13,16,19               |
| 15       | 44.64                       | 1.96, td, (12.0,<br>3.3)                            | 10,14 | 10,16,17               |
| 16       | 39.51                       |                                                     |       |                        |
| 17       | 21.09                       | 1.22, s                                             |       | 4,15,16,18             |
| 18       | 24.50                       | 1.77, s                                             |       | 4,15,16,17             |
| 19       | 142.51                      | 5.37, dd, (17.7,<br>11.1)                           | 20    | 11,12,14               |
| 20       | 114.50                      | Cis 4.90, d, (11.0)<br>Trans 4.83, d,<br>(17.6)     | 19    | 12,19                  |
| 21       | 28.21                       | 1.17, s                                             |       | 11,12,15,19            |
| 22       | 160.92                      |                                                     |       |                        |

**Table S20: 6-Bromo-12-*epi*-Hapalindole U (27)** $[\alpha]_D^{25} = +6.1$  (c=0.08, CH<sub>2</sub>Cl<sub>2</sub>)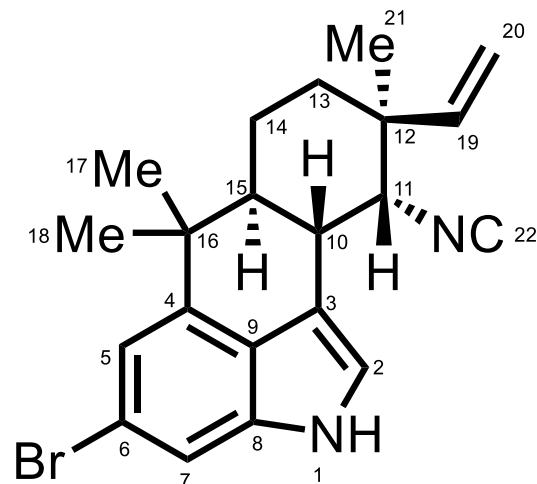

| Position | <sup>13</sup> C shift (ppm) | <sup>1</sup> H shift (ppm), multi (J)         | COSY  | HMBC                |
|----------|-----------------------------|-----------------------------------------------|-------|---------------------|
| 1        |                             | 6.46, bs                                      |       |                     |
| 2        | 117.06                      | 6.24, t, (1.9)                                |       | 3,8,9               |
| 3        | 113.22                      |                                               |       |                     |
| 4        | 142.74                      |                                               |       |                     |
| 5        | 117.33                      | 7.31, d, (1.9)                                |       | 6,7,9,16            |
| 6        | 117.42                      |                                               |       |                     |
| 7        | 111.94                      | 7.16 (in solvent)                             |       |                     |
| 8        | 135.10                      |                                               |       |                     |
| 9        | 124.75                      |                                               |       |                     |
| 10       | 34.81                       | 2.92, d, (10.3)                               | 11,15 | 3,15                |
| 11       | 63.43                       | 3.85, d, (3.1)                                | 10    | 3,10,12,13,15,19,22 |
| 12       | 39.78                       |                                               |       |                     |
| 13       | 31.07                       | 1.64, td, (13.8,3.9) & 1.42, dt, (14.3,3.7)   | 14    |                     |
| 14       | 21.58                       | 1.39, dd, (13.0,3.5) & 1.26, qd, (13.0,3.7)   | 13,15 |                     |
| 15       | 43.49                       | 1.88, td, (12.0,3.5)                          | 10,14 | 10,14,16,18         |
| 16       | 37.41                       |                                               |       |                     |
| 17       | 24.07                       | 1.10, s                                       |       | 4,15,16,18          |
| 18       | 24.94                       | 0.85, s                                       |       | 4,15,16,17          |
| 19       | 142.49                      | 5.39, dd, (17.7,11.0)                         | 20    | 11,12,13            |
| 20       | 114.51                      | (cis) 4.91, d, (11.0) (trans) 4.84, d, (17.7) | 19    | 12,19,21            |
| 21       | 28.23                       | 1.16, s                                       |       | 11,12,13,19         |
| 22       | 160.89                      |                                               |       |                     |

**Table S21: 5-Methoxy-12-*epi*-Hapalindole U (28)**[ $\alpha$ ]<sub>D</sub><sup>25</sup> = +7.4 (c=0.06, CH<sub>2</sub>Cl<sub>2</sub>)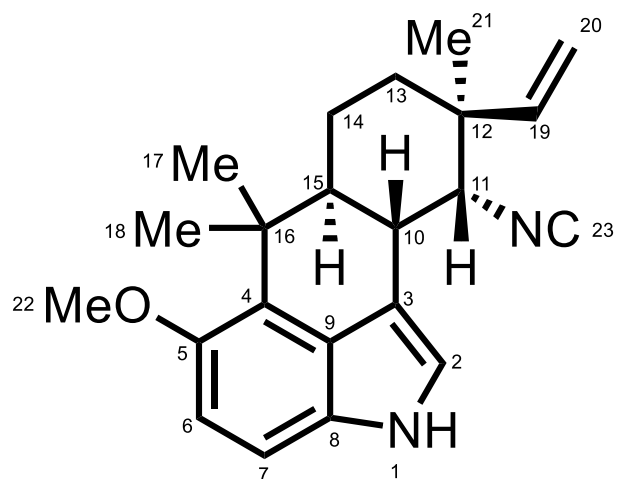

| Position | <sup>13</sup> C shift (ppm) | <sup>1</sup> H shift (ppm), multi (J)            | COSY       | HMBC                   |
|----------|-----------------------------|--------------------------------------------------|------------|------------------------|
| 1        |                             | 6.57, bs                                         | 2          |                        |
| 2        | 117.40                      | 6.40, t, (1.90)                                  | 1          | 3,4,9                  |
| 3        | 113.53                      |                                                  |            |                        |
| 4        | 130.57                      |                                                  |            |                        |
| 5        | 150.60                      |                                                  |            |                        |
| 6        | 111.74                      | 6.88, m                                          | 7          | 5,8,9                  |
| 7        | 109.12                      | 6.88, m                                          | 6          | 5,9                    |
| 8        | 126.52                      |                                                  |            |                        |
| 9        | 127.46                      |                                                  |            |                        |
| 10       | 34.57                       | 2.96, d, (11.6)                                  | 11, 15     | 3,15                   |
| 11       | 63.47                       | 3.96, s                                          | 10, 13, 15 | 3,10,12,15,13,19,21,23 |
| 12       | 39.77                       |                                                  |            |                        |
| 13       | 31.54                       | 1.72 & 1.49, m                                   | 14         | 11,14,15,17            |
| 14       | 21.61                       | 1.63 & 1.40, m                                   | 13         | 13,18                  |
| 15       | 44.59                       | 2.06, td, (12.0, 3.4)                            | 10, 11, 14 | 10,16,17               |
| 16       | 37.84                       |                                                  |            |                        |
| 17       | 22.53                       | 1.25, s                                          | 18         | 4,15,16,18             |
| 18       | 25.09                       | 1.75, s                                          | 17         | 4,15,16,17             |
| 19       | 142.74                      | 5.43, dd, (17.7, 10.9)                           | 20         | 11,12,13,21,           |
| 20       | 114.36                      | 4.92 (cis), d, (10.9)<br>4.87 (trans), d, (17.7) | 19         | 12,19,21               |
| 21       | 28.32                       | 1.20, s                                          |            | 11,12,13,14,19         |
| 22       | 57.12                       | 3.59, s                                          |            | 5                      |
| 23       | 160.72                      |                                                  |            |                        |



**Table S22: 5-Chloro-12- *epi*-Hapalindole U (24)**[ $\alpha$ ]<sub>D</sub><sup>25</sup> = +3.2 (c=0.08, CH<sub>2</sub>Cl<sub>2</sub>)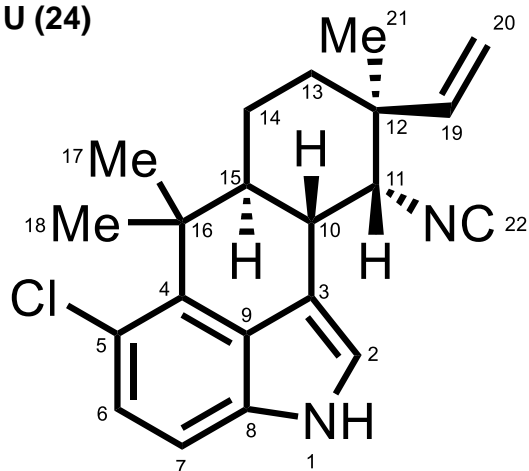

| Position | <sup>13</sup> C shift (ppm) | <sup>1</sup> H shift (ppm), multi (J)        | COSY  | HMBC        |
|----------|-----------------------------|----------------------------------------------|-------|-------------|
| 1        |                             | 6.52, bs                                     |       |             |
| 2        | 117.27                      | 6.29, d, (2.0)                               |       | 3,8,9       |
| 3        | 113.76                      |                                              |       |             |
| 4        | 136.16                      |                                              |       |             |
| 5        | 121.85                      |                                              |       |             |
| 6        | 126.70                      | 7.30, d, (8.4)                               | 7     | 4,8,5       |
| 7        | 110.24                      | 6.66, d, (8.4)                               | 6     | 5,9         |
| 8        | 133.26                      |                                              |       |             |
| 9        | 127.69                      |                                              |       |             |
| 10       | 34.13                       | 2.85, d, (11.7)                              | 15    | 3           |
| 11       | 63.22                       | 3.89, s                                      | 10,13 | 10,13,15,22 |
| 12       | 39.67                       |                                              |       |             |
| 13       | 31.48                       | 1.66, td, (13.8,3.8) & 1.43, m               | 14    |             |
| 14       | 21.87                       | 1.50, dt, (13.3,3.5) & 1.30, m               | 10,13 |             |
| 15       | 44.86                       | 1.97, td, (11.9,3.2)                         | 10,14 |             |
| 16       | 39.10                       |                                              |       |             |
| 17       | 21.23                       | 1.20, s                                      |       | 4,15,16,18  |
| 18       | 24.52                       | 1.74, s                                      |       | 4,15,16,17  |
| 19       | 142.49                      | 5.38, dd, (17.7,11.0)                        | 20    | 11,12,13,   |
| 20       | 114.48                      | Cis 4.90, d, (11.0)<br>Trans 4.83, d, (17.7) | 19    | 12,19       |
| 21       | 28.21                       | 1.18, s                                      |       | 11,12,13,19 |
| 22       | 160.90                      |                                              |       |             |

**Table S23: 6-Chloro-12-*epi*-Hapalindole U (25)** $[\alpha]_D^{25} = +2.6$  (c=0.15, CH<sub>2</sub>Cl<sub>2</sub>)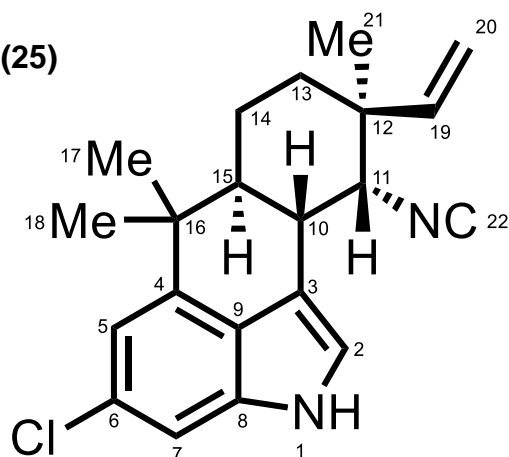

| Position | <sup>13</sup> C shift (ppm) | <sup>1</sup> H shift (ppm), multi (J)        | COSY     | HMBC        |
|----------|-----------------------------|----------------------------------------------|----------|-------------|
| 1        |                             | 6.48, bs                                     |          |             |
| 2        | 116.70                      | 6.26, s                                      | 1,10     | 3,4,9       |
| 3        | 112.76                      |                                              |          |             |
| 4        | 141.93                      |                                              |          |             |
| 5        | 108.58                      | 7.02, s                                      | 7        | 4,7         |
| 6        | 124.07                      |                                              |          |             |
| 7        | 114.38                      | 7.22, s                                      | 5        | 5           |
| 8        | 129.09                      |                                              |          |             |
| 9        | 134.19                      |                                              |          |             |
| 10       | 34.40                       | 2.92, d, (11.5)                              | 11, 15   |             |
| 11       | 63.07                       | 3.85, s                                      | 14,15    | 15          |
| 12       | 39.36                       |                                              |          |             |
| 13       | 21.17                       | 1.39 & 1.25, m                               | 14       |             |
| 14       | 30.63                       | 1.64, t, (13.0) & 1.41, m                    | 13,15    | 13,19       |
| 15       | 43.09                       | 1.89, t, (12.0)                              | 10,11,14 |             |
| 16       | 37.00                       |                                              |          |             |
| 17       | 23.67                       | 1.12, s                                      |          | 4,15,16,18  |
| 18       | 24.52                       | 0.86, s                                      |          | 4,15,16,17  |
| 19       | 142.07                      | 5.38, dd, (17.7, 11.0)                       | 20       | 11,12,14    |
| 20       | 114.10                      | Cis 4.92, d, (11.0)<br>Trans 4.84, d, (17.7) | 19       | 12,19       |
| 21       | 27.83                       | 1.16, s                                      |          | 11,12,13,19 |
| 22       | 160.44                      |                                              |          |             |

**Table S24: 5-Iodo-12-*epi*-Hapalindole U (29)**[ $\alpha$ ]<sub>D</sub><sup>25</sup> = +13.7 (c=0.10, CH<sub>2</sub>Cl<sub>2</sub>)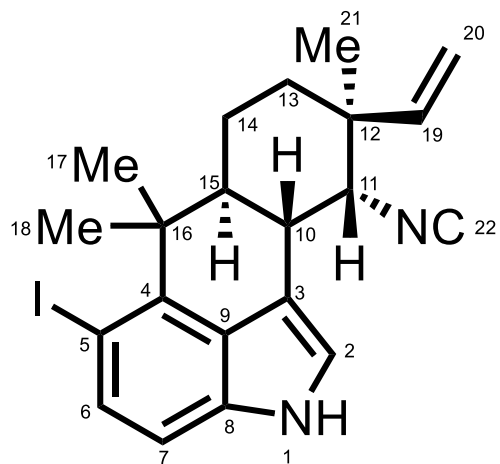

| Position | <sup>13</sup> C shift (ppm) | <sup>1</sup> H shift (ppm), multi (J)            | COSY     | HMBC           |
|----------|-----------------------------|--------------------------------------------------|----------|----------------|
| 1        |                             | 6.54, bs                                         | 2        |                |
| 2        | 116.47                      | 6.21, s                                          | 1,10     | 3,8,9          |
| 3        | 113.46                      |                                                  |          |                |
| 4        | 140.95                      |                                                  |          |                |
| 5        | 81.03                       |                                                  |          |                |
| 6        | 137.30                      | 7.88, d, (8.5)                                   | 7        | 4,8            |
| 7        | 111.10                      | 6.45, d, (8.4)                                   | 6        | 5,9            |
| 8        | 134.38                      |                                                  |          |                |
| 9        | 127.61                      |                                                  |          |                |
| 10       | 33.82                       | 2.83, d, (11.8)                                  | 11,15    | 3,15           |
| 11       | 63.18                       | 3.87, s                                          | 10,14    | 10,12,13,15,22 |
| 12       | 39.64                       |                                                  |          |                |
| 13       | 31.50                       | 1.63, td, (13.7, 3.6) & 1.39, m                  | 14       | 12,14,19       |
| 14       | 22.43                       | 1.44, m & 1.30, m                                | 11,13,15 | 11,12,15       |
| 15       | 45.25                       | 1.93, td, (12.0, 3.4)                            | 10,14    | 10,16,17       |
| 16       | 39.37                       |                                                  |          |                |
| 17       | 21.08                       | 1.22, s                                          | 18       | 4,15,16,18     |
| 18       | 24.44                       | 1.77, s                                          | 17       | 4,15,16,17     |
| 19       | 142.50                      | 5.37, dd, (17.7, 11.0)                           | 20       | 11,12,13       |
| 20       | 114.50                      | (cis) 4.89, d, (11.0)<br>(trans) 4.82, d, (17.7) | 19       | 12,19          |
| 21       | 28.20                       | 1.17, s                                          |          | 11,12,13,19    |
| 22       | 161.00                      |                                                  |          |                |

**Table S25: 12-*epi*-hapalindole U Nitrile (30)** $[\alpha]_D^{25} = +3.4$  (c=0.13, CH<sub>2</sub>Cl<sub>2</sub>)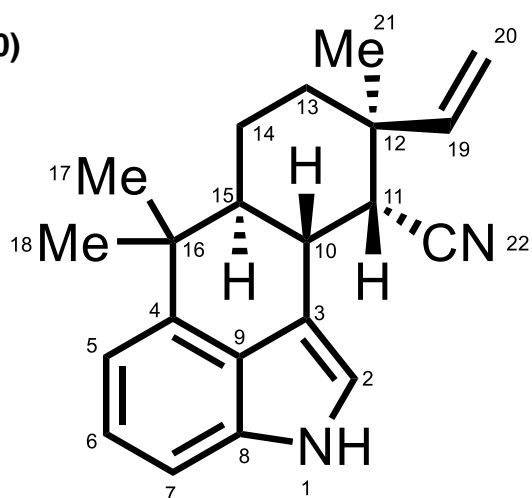

| Position | <sup>13</sup> C shift (ppm) | <sup>1</sup> H shift (ppm), multi (J)        | COSY  | HMBC             |
|----------|-----------------------------|----------------------------------------------|-------|------------------|
| 1        |                             | 6.66, bs                                     |       |                  |
| 2        | 116.64                      | 6.38, d, (1.9)                               |       | 3,8,9            |
| 3        | 114.20                      |                                              |       |                  |
| 4        | 141.10                      |                                              |       |                  |
| 5        | 113.48                      | 7.08, d, (7.3)                               | 6     | 7,9              |
| 6        | 123.54                      | 7.29, t, (7.7)                               | 5,7   | 4,8              |
| 7        | 108.76                      | 6.97, d, (8.1)                               | 6     | 5,9              |
| 8        | 134.60                      |                                              |       |                  |
| 9        | 125.62                      |                                              |       |                  |
| 10       | 33.34                       | 3.04, ddd, (11.5, 4.4, 1.6)                  | 11,15 | 3,13,15,22       |
| 11       | 44.16                       | 3.09, dd, (4.3, 2.0)                         | 10    | 3,10,12,13,15,22 |
| 12       | 38.98                       |                                              |       |                  |
| 13       | 33.46                       | 1.69, m & 1.53, m                            | 14    | 15,19            |
| 14       | 22.01                       | 1.53, m & 1.33, m                            | 10,13 | 15               |
| 15       | 46.15                       | 1.97, m                                      | 10,14 | 13,14,16,17      |
| 16       | 37.48                       |                                              |       |                  |
| 17       | 25.31                       | 1.00, s                                      |       | 4,15,16,18       |
| 18       | 24.43                       | 1.30, s                                      |       | 4,15,16,17       |
| 19       | 143.71                      | 5.44, dd, (17.7, 11.0)                       | 20    | 10,11,12,13      |
| 20       | 114.08                      | Cis 4.93, d, (11.0)<br>Trans 4.85, d, (17.7) | 19    | 12,19            |
| 21       | 29.68                       | 1.23, s                                      |       | 11,12,13,19      |
| 22       | 119.28                      |                                              |       |                  |

## 12-*epi*-Fischerindole U Derivatives

### Table S26: 5-Fluoro-12-*epi*-Fischerindole U (33)

Full characterization data<sup>1</sup>

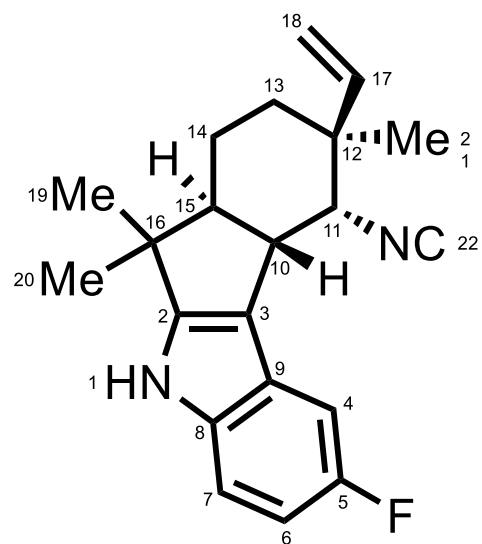

**Table S27: 6-Fluoro-12-*epi*-Fischerindole U (37)**  
Full characterization data<sup>1</sup>

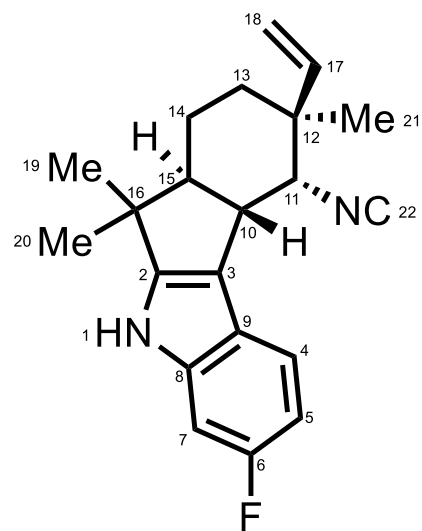

**Table S28: 5-Chloro-12-*epi*-Fischerindole U (34)**[ $\alpha$ ]<sub>D</sub><sup>25</sup> = +9.8 (c=0.08, CH<sub>2</sub>Cl<sub>2</sub>)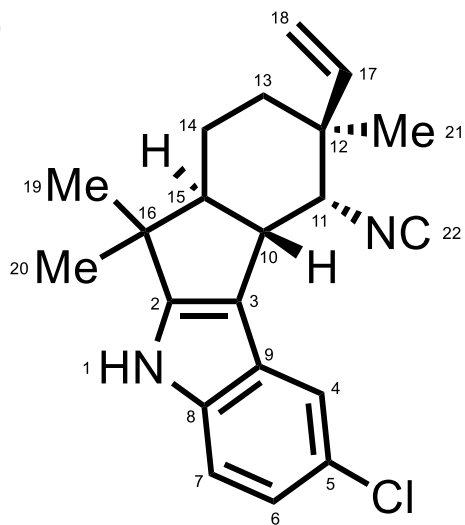

| Position | <sup>13</sup> C shift (ppm), C6D6 | <sup>1</sup> H shift (ppm), multi (J) C6D6          | COSY  | HMBC           |
|----------|-----------------------------------|-----------------------------------------------------|-------|----------------|
| 1        |                                   | 6.48, bs                                            |       |                |
| 2        | 153.58                            |                                                     |       |                |
| 3        | 114.76                            |                                                     |       |                |
| 4        | 118.24                            | 7.68, d, (2.0)                                      |       | 3,5,6,8        |
| 5        | 125.40                            |                                                     |       |                |
| 6        | 121.31                            | 7.23, dd, (8.6,2.0)                                 | 6     | 4,8,9          |
| 7        | 113.07                            | 6.81, d, (8.6)                                      | 7     | 4,5            |
| 8        | 138.40                            |                                                     |       |                |
| 9        | 126.18                            |                                                     |       |                |
| 10       | 42.37                             | 2.86, dd,(10.8,4.3)                                 | 11    | 3,15           |
| 11       | 62.22                             | 3.89, d,(2.9)                                       | 10,15 | 12,13,15       |
| 12       | 41.06                             |                                                     |       |                |
| 13       | 31.81                             | 1.54, m                                             | 15    | 11,12,14,15,17 |
| 14       | 20.82                             | 1.33, m & 1.22, m                                   | 13,15 |                |
| 15       | 55.16                             | 2.35, ddd,<br>(13.3,10.7,3.1)                       | 11,14 | 16,19,20       |
| 16       | 40.16                             |                                                     |       |                |
| 17       | 143.02                            | 5.31,<br>dd,(17.6,11.0)                             | 18    | 11,12,13       |
| 18       | 114.19                            | (cis) 4.88, d, (10.9)<br>(trans) 4.83, d,<br>(17.6) | 17    | 12,17          |
| 19       | 24.90                             | 1.00, s                                             |       | 2,16,15,20     |
| 20       | 20.73                             | 0.72, s                                             |       | 2,16,15,19     |
| 21       | 28.13                             | 1.12, s                                             |       | 11,12,13,17    |
| 22       | 161.37                            |                                                     |       |                |

**Table S29: 6-Chloro-12-*epi*-Fischerindole U (38)** $[\alpha]_D^{25} = +20.3$  (c=0.05, CH<sub>2</sub>Cl<sub>2</sub>)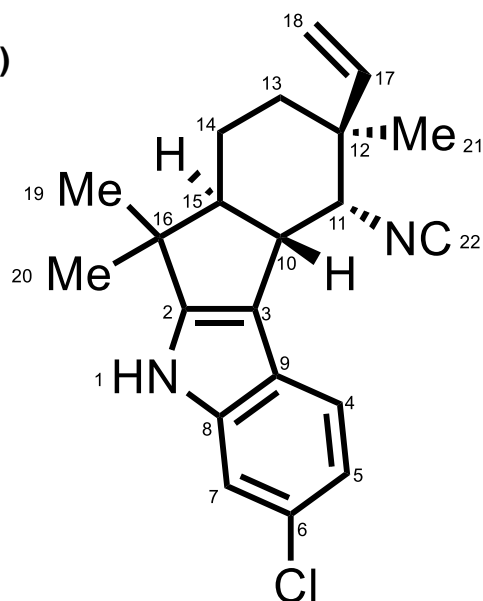

| Position | <sup>13</sup> C shift (ppm), C6D6 | <sup>1</sup> H shift (ppm), multi (J) C6D6 | COSY  | HMBC        |
|----------|-----------------------------------|--------------------------------------------|-------|-------------|
| 1        |                                   | 6.39, bs                                   |       |             |
| 2        | 152.70                            |                                            |       |             |
| 3        | 115.00                            |                                            |       |             |
| 4        | 112.25                            | 7.16, in solvent peak                      | 5     | 3           |
| 5        | 120.96                            | 7.23, dd, (8.4, 1.9)                       | 4     | 4,9         |
| 6        | 126.93                            |                                            |       |             |
| 7        | 119.44                            | 7.17, s                                    |       |             |
| 8        | 140.37                            |                                            |       |             |
| 9        | 122.93                            |                                            |       |             |
| 10       | 42.39                             | 2.86, m                                    | 11,15 |             |
| 11       | 62.34                             | 4.00, d, (3.0)                             | 10    | 12,13,15    |
| 12       | 41.02                             |                                            |       |             |
| 13       | 31.84                             | 1.55, dd, (9.0, 3.8)                       | 14    | 12,15       |
| 14       | 20.64                             | 1.32, m & 1.22, m                          | 10,13 | 13,15       |
| 15       | 55.30                             | 2.34, ddd, (13.5, 10.7, 3.2)               | 10,14 |             |
| 16       | 40.22                             |                                            |       |             |
| 17       | 143.03                            | 5.32, dd, (17.6, 11.0)                     | 18    | 11,12,13    |
| 18       | 114.20                            | 4.87, m                                    | 17    | 12,17       |
| 19       | 24.92                             | 0.99, s                                    |       | 2,15,16,20  |
| 20       | 20.79                             | 0.72, s                                    |       | 2,15,16,19  |
| 21       | 28.15                             | 1.15, s                                    |       | 11,12,13,17 |
| 22       | 161.38                            |                                            |       |             |



**Table S30: 6-Bromo-12-*epi*-Fischerindole U (39)**[ $\alpha$ ]<sub>D</sub><sup>25</sup> = +14.8 (c=0.07, CH<sub>2</sub>Cl<sub>2</sub>)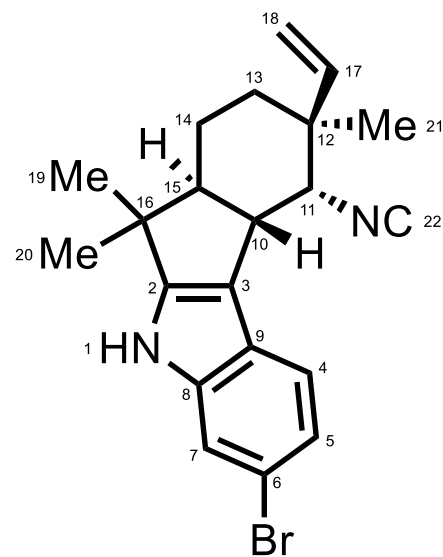

| Position | <sup>13</sup> C shift (ppm), C6D6 | <sup>1</sup> H shift (ppm), multi (J) C6D6       | COSY  | HMBC        |
|----------|-----------------------------------|--------------------------------------------------|-------|-------------|
| 1        |                                   | 6.41, bs                                         |       |             |
| 2        | 152.65                            |                                                  |       |             |
| 3        | 115.03                            |                                                  |       |             |
| 4        | 119.82                            | 7.12, d, (8.4)                                   | 5     | 6,8         |
| 5        | 123.55                            | 7.35, dd, (8.3,1.8)                              | 4     | 3,7,9       |
| 6        | 114.49                            |                                                  |       |             |
| 7        | 115.22                            | 7.29, d, (1.8)                                   |       | 5,6         |
| 8        | 140.78                            |                                                  |       |             |
| 9        | 123.18                            |                                                  |       |             |
| 10       | 42.38                             | 2.86, dd, (11.1,4.1)                             | 11,15 | 3           |
| 11       | 62.33                             | 4.00, d, (3.0)                                   | 10    | 10,13,15,22 |
| 12       | 41.02                             |                                                  |       |             |
| 13       | 31.83                             | 1.55, m                                          |       | 11,12,15,17 |
| 14       | 20.61                             | 1.22, m & 1.34, m                                | 15    |             |
| 15       | 55.31                             | 2.33, ddd, (13.4,10.6,3.1)                       | 10,14 | 16,19,20    |
| 16       | 40.20                             |                                                  |       |             |
| 17       | 143.01                            | 5.33, dd, (17.6,11.0)                            | 18    | 11,12,13    |
| 18       | 114.20                            | (cis) 4.88, d, (11.6)<br>(trans) 4.86, d, (18.1) | 17    | 12,17       |
| 19       | 24.89                             | 0.99, s                                          |       | 2,15,16,20  |
| 20       | 20.79                             | 0.72, s                                          |       | 2,15,16,19  |
| 21       | 28.15                             | 1.14, s                                          |       | 11,12,13,17 |
| 22       | 161.35                            |                                                  |       |             |

**Table S31: 7-Aza-12-*epi*-Fischerindole U (36)**[ $\alpha$ ]<sub>D</sub><sup>25</sup>=+17.2 (c=0.17, CH<sub>2</sub>Cl<sub>2</sub>)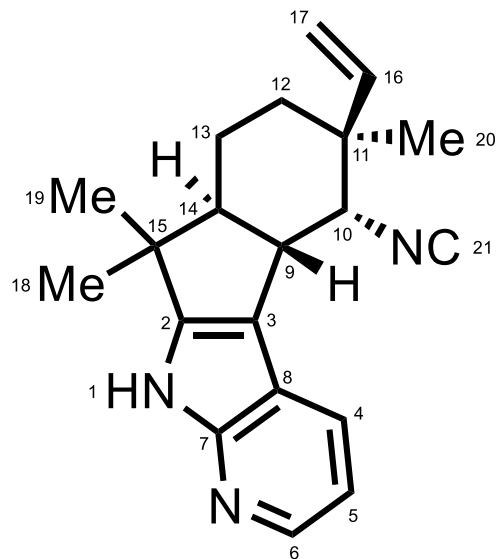

| Position | <sup>13</sup> C shift (ppm), C6D6 | <sup>1</sup> H shift (ppm), multi (J) C6D6    | COSY  | HMBC          |
|----------|-----------------------------------|-----------------------------------------------|-------|---------------|
| 1        |                                   | 10.42, bs                                     |       |               |
| 2        | 153.16                            |                                               |       |               |
| 3        | 112.46                            |                                               |       |               |
| 4        | 126.02                            | 7.55, dd, (7.7, 1.6)                          | 5     | 3,6,7,8       |
| 5        | 116.25                            | 6.89, dd, (7.7, 4.7)                          | 4,6   | 6,8           |
| 6        | 141.04                            | 8.35, dd, (4.7,1.6)                           | 5     | 4,5,7         |
| 7        | 152.56                            |                                               |       |               |
| 8        | 117.63                            |                                               |       |               |
| 9        | 42.91                             | 2.96, dd, (10.5,3.6)                          | 10,14 | 3,14          |
| 10       | 62.47                             | 4.06, d, (3.0)                                | 9     | 9,12,14,16,21 |
| 11       | 41.03                             |                                               |       |               |
| 12       | 31.89                             | 1.56, dd, (11.3,4.0)                          | 13    | 14,16         |
| 13       | 20.75                             | 1.35, dq, (17.8,6.3) & 1.24, dt, (12.7,3.7)   | 12,14 | 14            |
| 14       | 54.82                             | 2.37, ddd, (13.4, 10.7,3.1)                   | 9,13  | 13,15         |
| 15       | 40.63                             |                                               |       |               |
| 16       | 143.07                            | 5.37, dd, (17.6,11.0)                         | 17    | 10,11,12      |
| 17       | 114.22                            | (cis) 4.90, d, (11.2) (trans) 4.88, d, (17.9) | 16    | 11,16,20      |
| 18       | 20.62                             | 0.80, s                                       |       | 2,14,15,19    |
| 19       | 24.94                             | 1.14, s                                       |       | 2,14,15,18    |
| 20       | 28.15                             | 1.16, s                                       |       | 10,11,12,16   |
| 21       | 161.50                            |                                               |       |               |

**Table S32: 5-Methoxy-12-*epi*-Fischerindole U (35)**[ $\alpha$ ]<sub>D</sub><sup>25</sup>=+36.6 (c=0.03, CH<sub>2</sub>Cl<sub>2</sub>)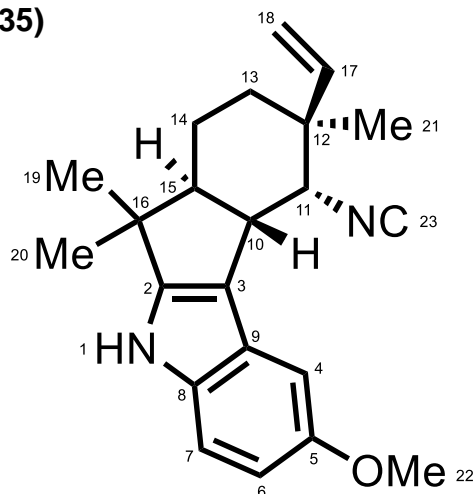

| Position | <sup>13</sup> C shift (ppm), C6D6 | <sup>1</sup> H shift (ppm), multi (J) C6D6     | COSY  | HMBC        |
|----------|-----------------------------------|------------------------------------------------|-------|-------------|
| 1        |                                   | 6.47, bs                                       |       |             |
| 2        | 152.81                            |                                                |       |             |
| 3        | 114.78                            |                                                |       |             |
| 4        | 101.45                            | 7.20, d, (2.4)                                 |       | 3,6,9       |
| 5        | 155.28                            |                                                |       |             |
| 6        | 110.76                            | 7.05, dd, (8.8,2.4)                            |       | 4,9         |
| 7        | 112.69                            | 6.99, d, (8.8)                                 |       | 4,8,5       |
| 8        | 125.00                            |                                                |       |             |
| 9        | 135.34                            |                                                |       |             |
| 10       | 42.64                             | 3.01, dd, (11.0,4.2)                           | 11,15 | 3,15        |
| 11       | 62.66                             | 4.18, d, (3.0)                                 | 10    | 10,12,13,15 |
| 12       | 41.07                             |                                                |       |             |
| 13       | 31.86                             | 1.59, m                                        | 14    | 12,15,17    |
| 14       | 20.91                             | 1.40, m & 1.27, dt, (12.3,3.6)                 | 13    |             |
| 15       | 55.25                             | 2.42, ddd, (13.4,10.7,3.5)                     | 10,14 | 16,19       |
| 16       | 40.11                             |                                                |       |             |
| 17       | 143.12                            | 5.34, dd, (17.5,11.0)                          | 18    | 12,13       |
| 18       | 114.10                            | (cis) 4.89, d, (1.5)<br>(trans) 4.87, d, (8.4) | 17    | 12,17       |
| 19       | 25.07                             | 1.06, s                                        |       | 2,15,16,20  |
| 20       | 20.86                             | 0.81, s                                        |       | 2,15,16,19  |
| 21       | 28.12                             | 1.12, s                                        |       | 11,12,13,17 |
| 22       | 55.59                             | 3.58, s                                        |       | 5           |
| 23       | 161.34                            |                                                |       |             |

**Table S33: 12-*epi*-Fischerindole U Nitrile (40)** $[\alpha]_D^{25} = +66.5$  (c=0.03, CH<sub>2</sub>Cl<sub>2</sub>)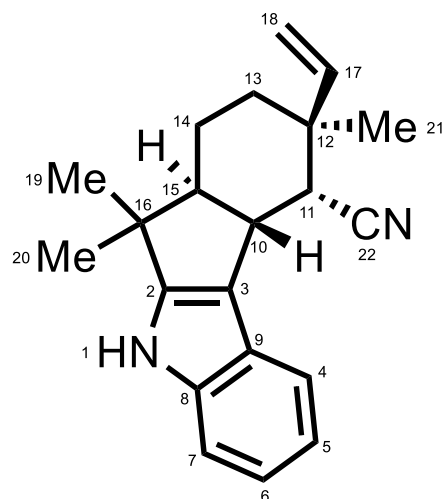

| Position | <sup>13</sup> C shift (ppm), C6D6 | <sup>1</sup> H shift (ppm), multi (J) C6D6   | COSY  | HMBC           | NOESY     |
|----------|-----------------------------------|----------------------------------------------|-------|----------------|-----------|
| 1        |                                   | 6.54, bs                                     |       |                |           |
| 2        | 151.63                            |                                              |       |                |           |
| 3        | 115.55                            |                                              |       |                |           |
| 4        | 118.77                            | 7.52, dd, (6.2,2.9)                          | 5     | 5,8            |           |
| 5        | 120.40                            | 7.24, dd, (6.0,3.1)                          |       | 4,7,8          |           |
| 6        | 121.13                            | 7.24, dd, (6.0,3.1)                          |       | 4,7,8          |           |
| 7        | 112.19                            | 7.11, m                                      | 6     | 6,9            |           |
| 8        | 140.23                            |                                              |       |                |           |
| 9        | 124.61                            |                                              |       |                |           |
| 10       | 40.93                             | 2.98, dd, (10.6,4.0)                         | 11,15 | 3,14,15,22     | 14a,20    |
| 11       | 43.04                             | 3.25, d, (3.9)                               | 10,13 | 12,13,15,17,22 | 21        |
| 12       | 40.40                             |                                              |       |                |           |
| 13       | 33.76                             | 1.61, m                                      | 14    | 12,14,15,17    | 14,21     |
| 14       | 21.03                             | 1.38 (a), m & 1.28 (b), m                    | 13,15 | 12,21          |           |
| 15       | 58.49                             | 2.39, ddd, (13.3,10.5,3.1)                   | 10,14 | 10,14,19       | 14b,19    |
| 16       | 40.32                             |                                              |       |                |           |
| 17       | 113.94                            | 5.34, dd, (17.6,10.9)                        | 18    | 12,18          | 18        |
| 18       | 144.19                            | Cis 4.88, d, (10.9)<br>Trans 4.85, d, (17.6) | 17    | 11,12,13       | 17        |
| 19       | 25.03                             | 1.03, s                                      |       | 2,15,16,20     | 14b,20,21 |
| 20       | 20.72                             | 0.76, s                                      |       | 2,15,16,19     | 14a,19    |
| 21       | 29.68                             | 1.19, s                                      |       | 11,12,13,14,17 |           |
| 22       | 118.91                            |                                              |       |                |           |

## 12-*epi*-Hapalindole C Derivatives

**Table S34: 7-Aza-12-*epi*-Hapalindole C (31)**

$[\alpha]_D^{25} = +2.5$  (c=0.27, CH<sub>2</sub>Cl<sub>2</sub>)

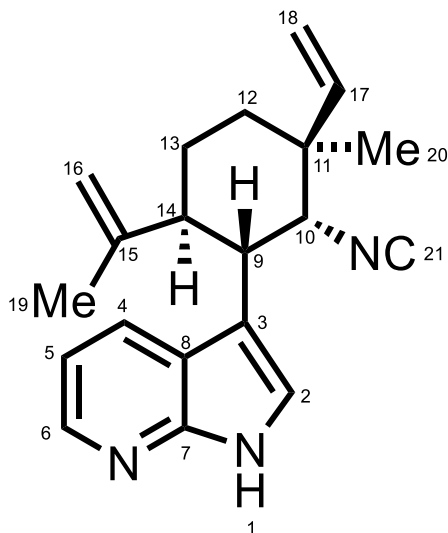

| Position | <sup>13</sup> C shift (ppm) | <sup>1</sup> H shift (ppm), multi (J)            | COSY  | HMBC            |
|----------|-----------------------------|--------------------------------------------------|-------|-----------------|
| 1        |                             | 7.72, bs                                         |       |                 |
| 2        | 124.20                      | 6.88, s                                          |       | 3,7,8           |
| 3        | 112.65                      |                                                  |       |                 |
| 4        | 125.65                      | 7.55, d, (7.9)                                   | 5     | 3,6,7,8         |
| 5        | 115.82                      | 6.82, t (11.9, 6.9)                              | 4,6   | 4,6,8           |
| 6        | 143.71                      | 8.42, d, (3.9)                                   | 5     | 4,5,7           |
| 7        | 148.86                      |                                                  |       |                 |
| 8        | 119.24                      |                                                  |       |                 |
| 9        | 36.58                       | 3.23, d, (12.2)                                  |       | 2,3,8,10,14     |
| 10       | 66.36                       | 3.35, s                                          |       | 3,9,11,12,14,21 |
| 11       | 40.42                       |                                                  |       |                 |
| 12       | 30.81                       | 1.77, td, (13.9, 3.5) & 1.37, m                  | 13,20 | 11,13,14,17     |
| 13       | 28.69                       | 1.56, m                                          | 12    | 9,12,14,15      |
| 14       | 43.79                       | 2.87, td, (12.8, 3.5)                            | 13    | 3,9,10,13,15,19 |
| 15       | 147.72                      |                                                  |       |                 |
| 16       | 112.68                      | 4.72, s & 4.60, s                                | 19    | 14,15,19        |
| 17       | 142.84                      | 5.48, dd, (17.7, 10.9)                           | 18    | 10,11,12        |
| 18       | 114.73                      | (cis) 5.01, d, (11.1)<br>(trans) 4.84, d, (17.7) | 17    | 11,17           |
| 19       | 18.82                       | 1.32, s                                          | 16    | 14, 15,16       |
| 20       | 28.43                       | 1.02, s                                          |       | 11,12,13,17     |
| 21       | 161.25                      |                                                  |       |                 |

**Table S35: 5-Fluoro-7-Aza-12-*epi*-Hapalindole C (32)**

$[\alpha]_D^{25} = +17.3$  (c=0.05, CH<sub>2</sub>Cl<sub>2</sub>)

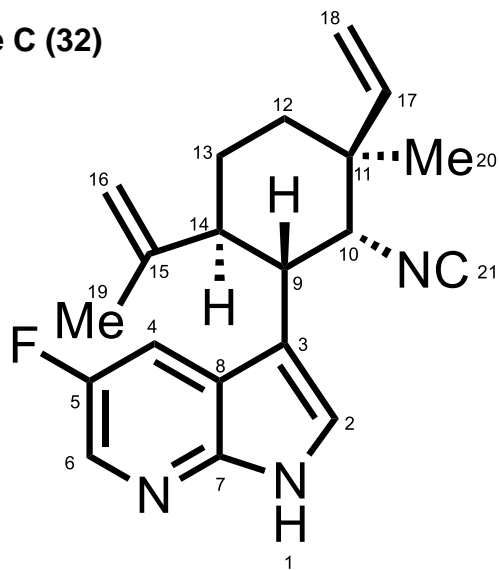

| Position | <sup>13</sup> C shift (ppm)<br>(Fluorine coupling, J) | <sup>1</sup> H shift (ppm),<br>multi (J)         | COSY     | HMBC            |
|----------|-------------------------------------------------------|--------------------------------------------------|----------|-----------------|
| 1        |                                                       | 7.64, bs                                         | 2        |                 |
| 2        | 126.46                                                | 6.89, d, (2.6)                                   | 1        | 3,7,8           |
| 3        | 112.74                                                |                                                  |          |                 |
| 4        | 111.38, d, (21)                                       | 7.31, dd, (9.1, 3.0)                             | 6        | 3,5,7           |
| 5        | 156.21, d, (242)                                      |                                                  |          |                 |
| 6        | 132.19, d, (29)                                       | 8.29, t, (2.1)                                   | 4        | 4,7             |
| 7        | 145.27                                                |                                                  |          |                 |
| 8        | 119.07                                                |                                                  |          |                 |
| 9        | 36.50                                                 | 3.08, dq, (10.9, 3.4)                            | 10,14    | 2,3,8,14        |
| 10       | 66.16                                                 | 3.27, s                                          | 9,12     | 9,11,12,14      |
| 11       | 40.29                                                 |                                                  |          |                 |
| 12       | 30.72                                                 | 1.73, td, (13.7, 4.5) & 1.37, m                  | 10,13,20 | 11,17,20        |
| 13       | 28.54                                                 | 1.52, m & 1.46, m                                | 12,14,20 | 12,14,17        |
| 14       | 43.64                                                 | 2.80, td, (12.0, 4.2)                            | 9,13,20  | 3,9,13,15,16,19 |
| 15       | 147.05                                                |                                                  |          |                 |
| 16       | 112.77                                                | 4.67, s & 4.58, s                                | 19       | 15,19           |
| 17       | 142.54                                                | 5.39, dd, (17.7, 11.0)                           | 18       | 10,11,12        |
| 18       | 114.91                                                | (cis) 4.95, d, (11.0)<br>(trans) 4.78, d, (17.7) | 17       | 11,17           |
| 19       | 18.79                                                 | 1.28, s                                          | 16       | 14,15,16        |
| 20       | 28.40                                                 | 1.00, s                                          | 10,13,14 | 10,11,12,17     |
| 21       | 161.34                                                |                                                  |          |                 |

**Table S36: HpiC1→FamC1 mutagenesis percent conversions**

| Substrate | WT HpiC1            | WT FamC1            | V51I               | F138L               | L147F               | F138LL147F          |
|-----------|---------------------|---------------------|--------------------|---------------------|---------------------|---------------------|
| 12        | >99%                | >99%                | 70%                | 92%                 | 33%                 | 56%                 |
| 13        | >99%                | >99%                | 76%                | 31%                 | 19%                 | >99%                |
| 10        | >99%                | 20%                 | 60%                | 26%                 | >99%                | 42%                 |
| 11        | 77%                 | 30%                 | 13%                | 39%                 | 81%                 | 73%                 |
| 14        | 85%                 | 10%                 | 67%                | 31%                 | 18%                 | 13%                 |
| 15        | 90%                 | 12%                 | 11%                | 52%                 | 27%                 | 47%                 |
| 8         | 14% tri,<br>52% tet | <1% tri,<br>19% tet | 4% tri,<br>63% tet | <1% tri,<br>36% tet | <1% tri,<br>47% tet | <1% tri,<br>17% tet |
| 9         | N/A                 | N/A                 | N/A                | N/A                 | N/A                 | N/A                 |
| 16        | 30%                 | N/A                 | 30%                | 8%                  | 10%                 | N/A                 |
| 19        | >99%                | 60%                 | 30%                | 40%                 | 54%                 | 35%                 |
| 6         | N/A                 | N/A                 | N/A                | N/A                 | N/A                 | N/A                 |
| 17        | 93%                 | 70%                 | 8%                 | 9%                  | 5%                  | 5%                  |
| 18        | 45%                 | N/A                 | 3%                 | 2%                  | <1%                 | N/A                 |

**Table S37: HpiC1→FimC5 mutagenesis percent conversions and hapalindole/fischerindole product ratio**

| Substrate | WT HpiC1        | WT FimC5        | Y101F          | F138S          | Y101FF138S     |
|-----------|-----------------|-----------------|----------------|----------------|----------------|
| 12        | >99% 22         | >99% 33         | 60% 22         | 9% 33, 29% 22  | 37% 33, 22% 22 |
| 13        | >99% 23         | >99% 37         | 57% 23         | 14% 37, 18% 23 | 27% 37, 5% 23  |
| 10        | >99% 24         | 20% 34          | 36% 24         | N/A            | 1% 34          |
| 11        | 77% 25          | 58% 38          | 59% 25         | 10% 38, 59% 25 | 12% 38, 10% 25 |
| 14        | 85% 26          | N/A             | 18% 26         | N/A            | N/A            |
| 15        | 90% 27          | >99% 39         | 34% 27         | 22% 39, 4% 27  | 50% 39, 20% 27 |
| 8         | 14% tri, 52% 28 | >99% 35         | 2% tri, 18% 28 | 20% 35         | 30% 35         |
| 9         | N/A             | N/A             | N/A            | N/A            | N/A            |
| 16        | 30% 29          | N/A             | 17% 29         | N/A            | N/A            |
| 19        | >99% 30         | 77% 40          | 18% 30         | 6% 40, 14% 30  | 10% 40, 3% 30  |
| 6         | N/A             | N/A             | N/A            | N/A            | N/A            |
| 17        | 93% 31          | 59% 36 , 39% 31 | 13% 31         | 10% 36, 10% 31 | 13% 36, 6% 31  |
| 18        | 45% 32          | 14% 32          | 73% 32         | 24% 32         | 24% 32         |



**Figures S1-S11: HpiC1→FimC5 mutagenesis HPLC traces**  
**Note: HPLC traces do not represent best possible conversion**

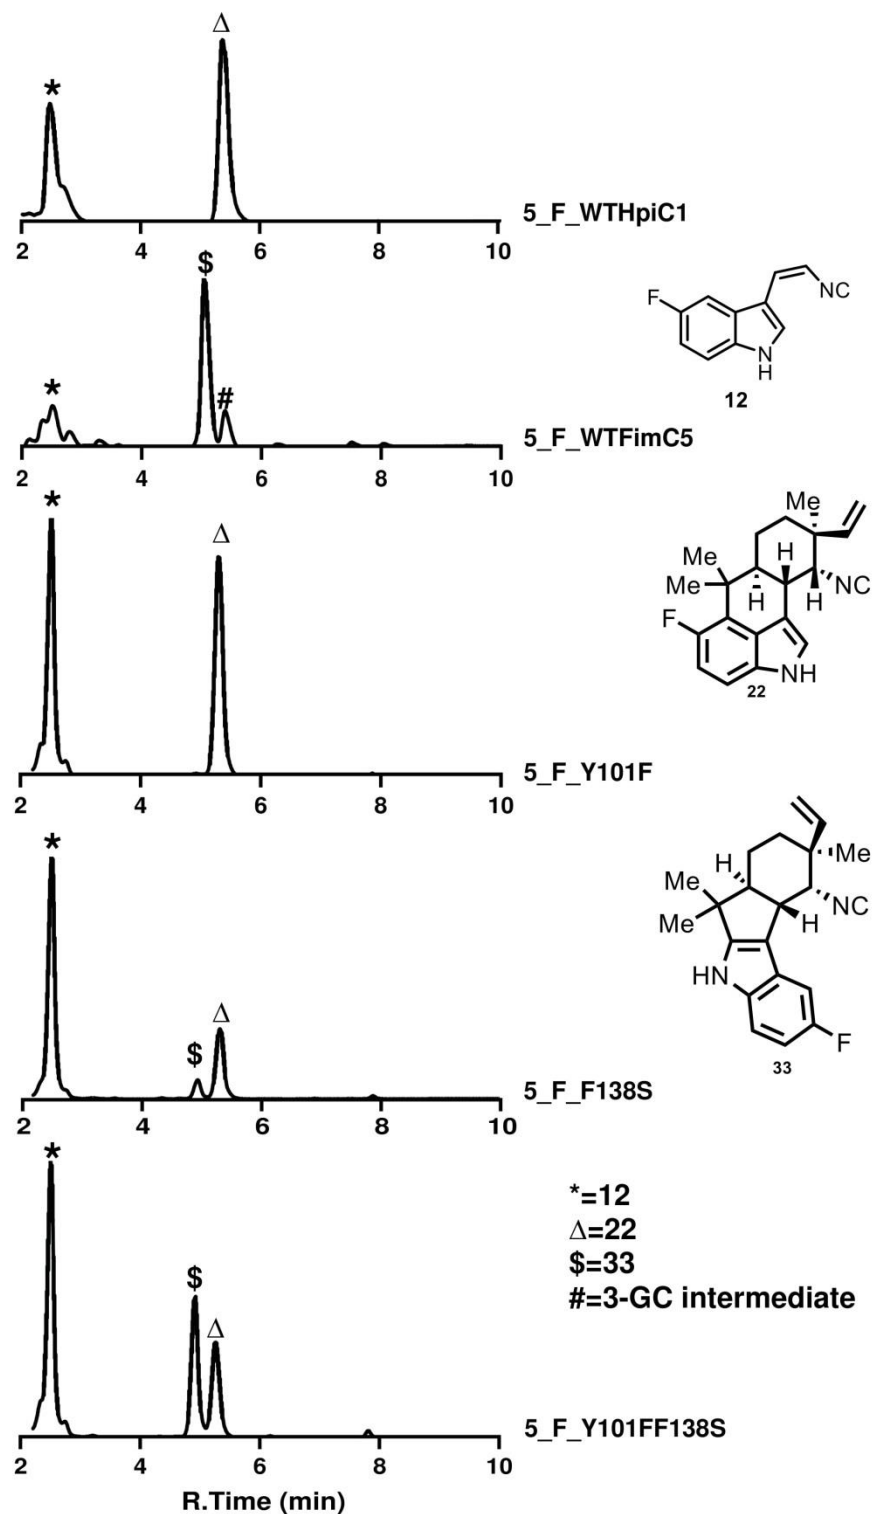

**Figure S1: HpiC1→FimC5 mutagenesis results for substrate 12**

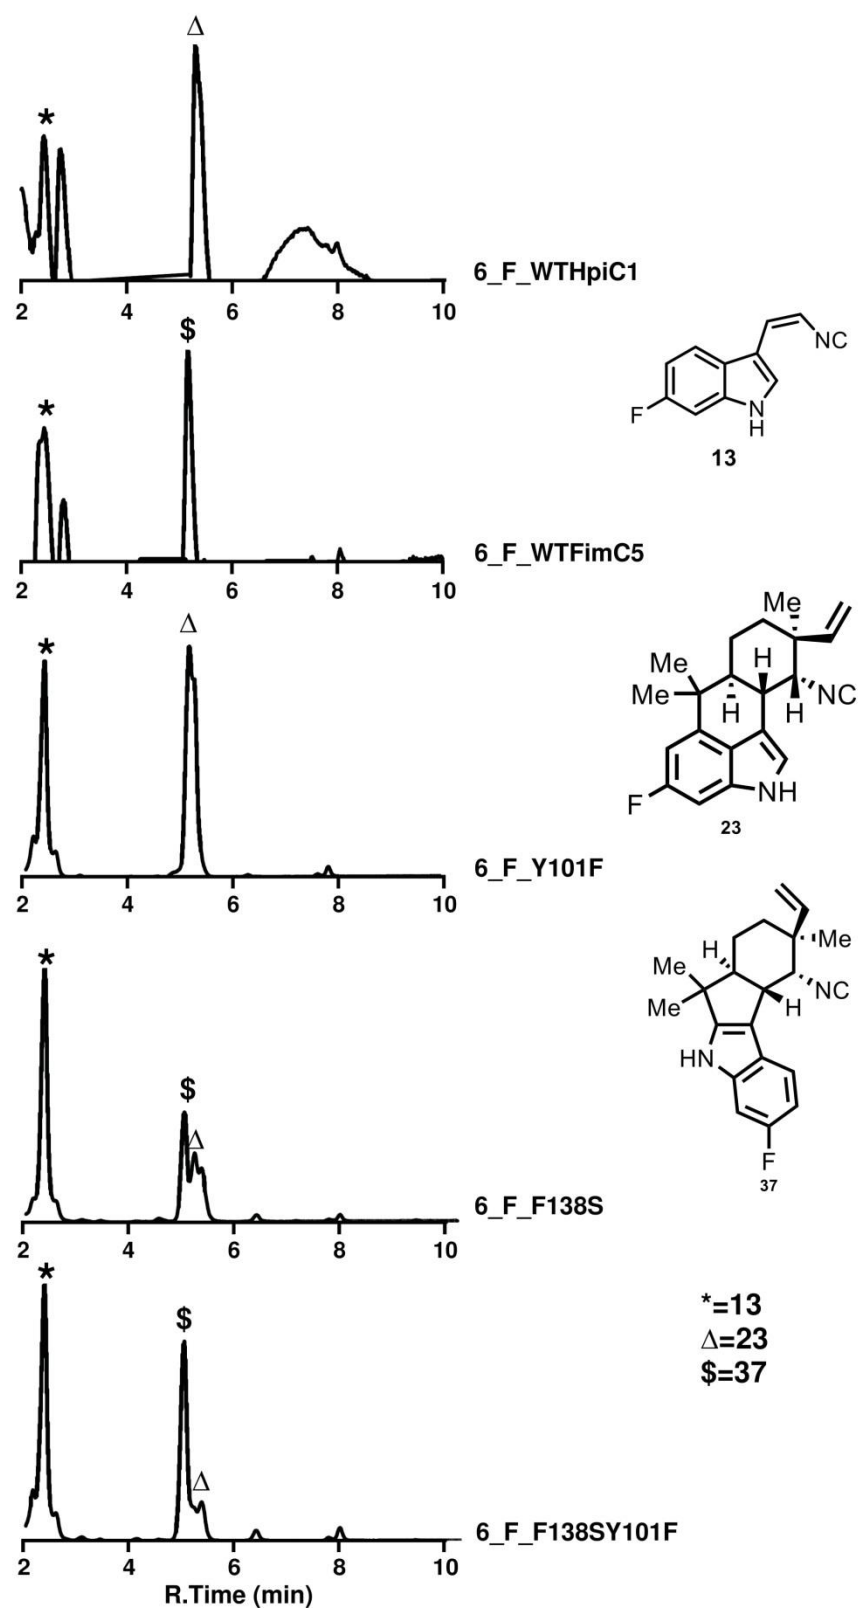

**Figure S2:** HpiC1→FimC5 mutagenesis results for substrate **13**

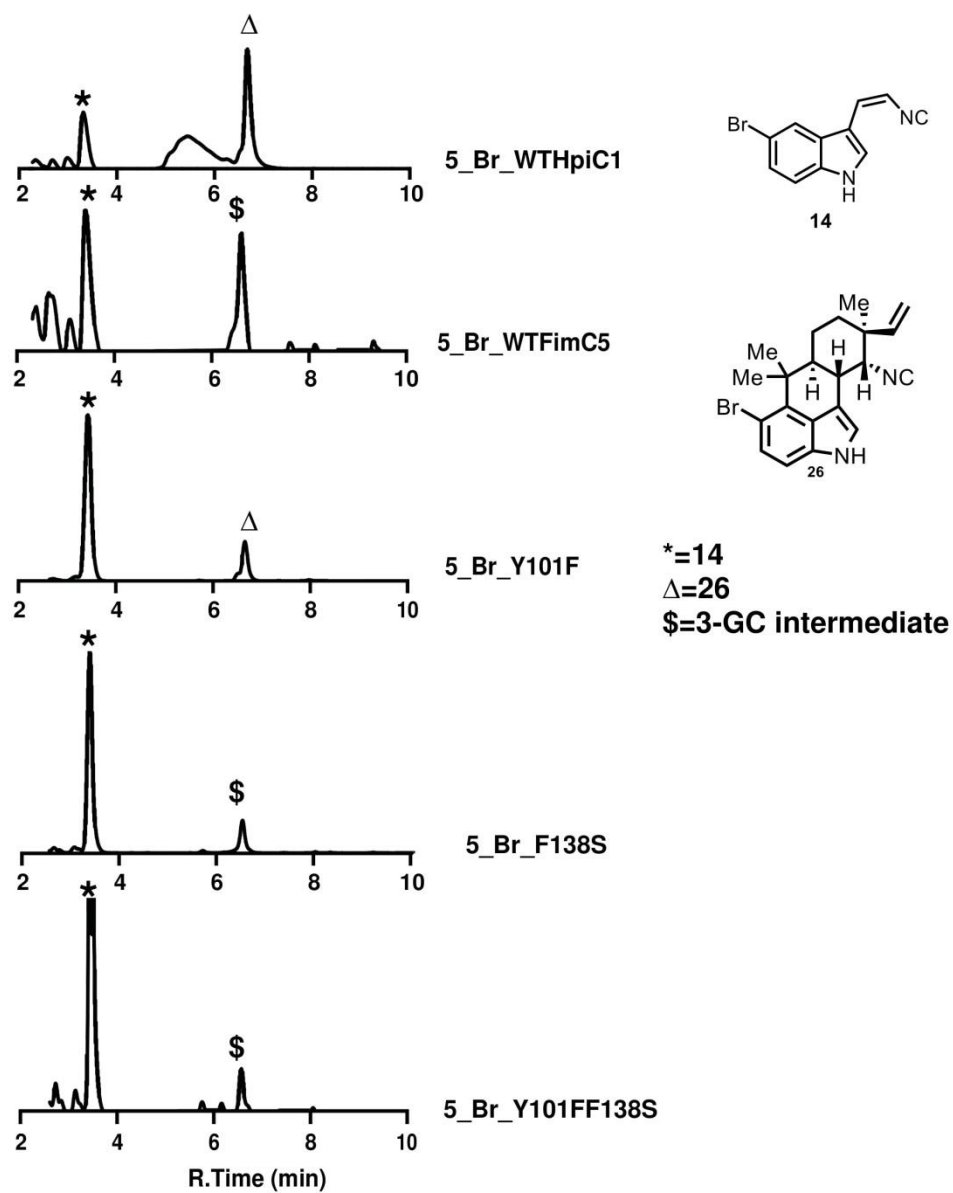

**Figure S3:** HpiC1→FimC5 mutagenesis results for substrate **14**

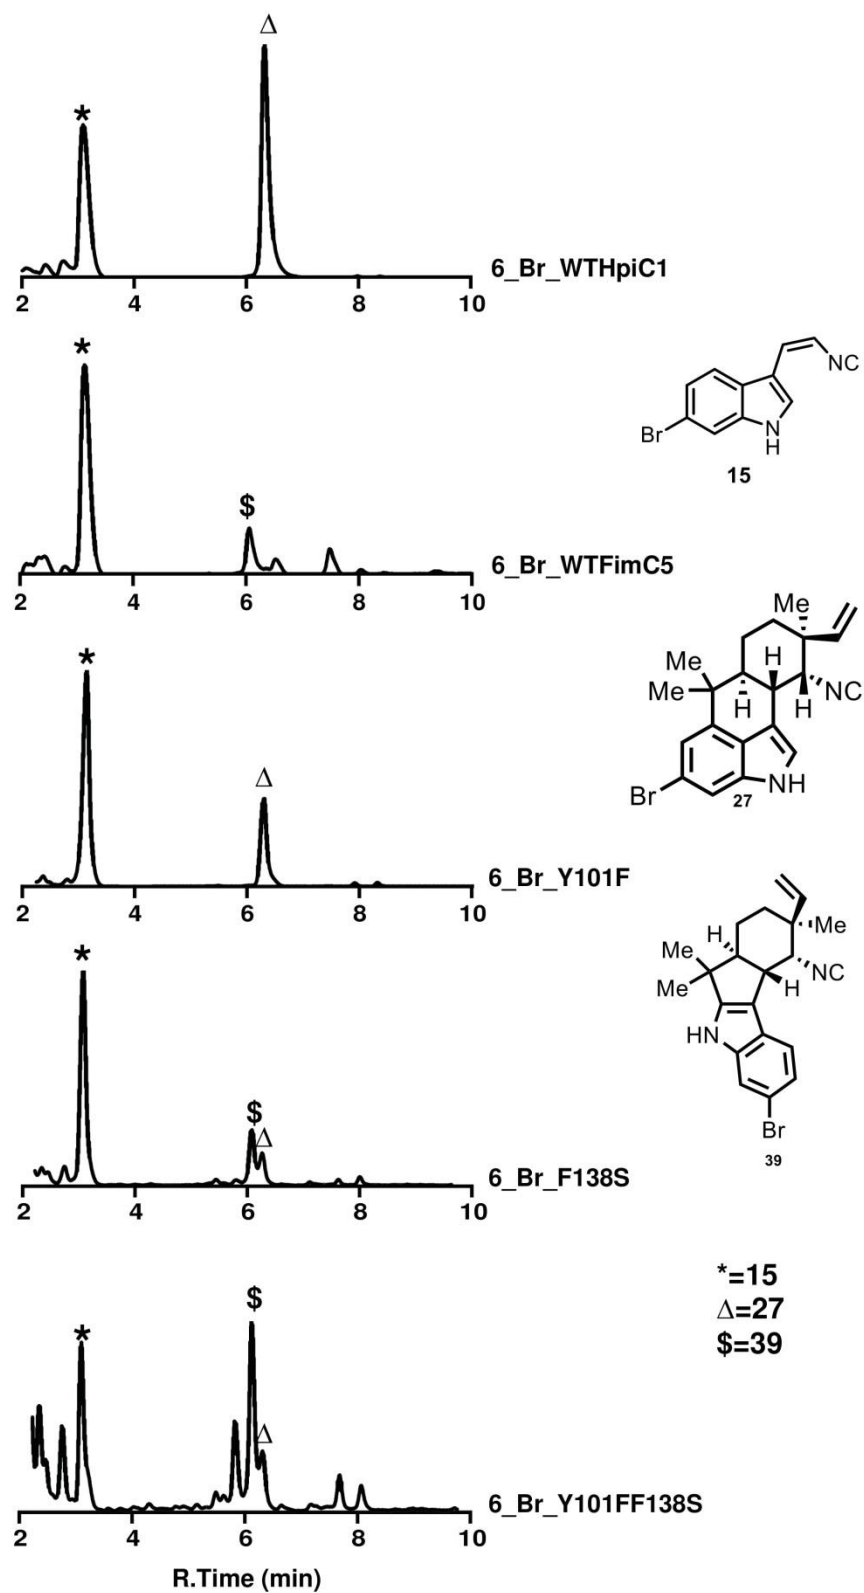

**Figure S4:** HpiC1→FimC5 mutagenesis results for substrate **15**

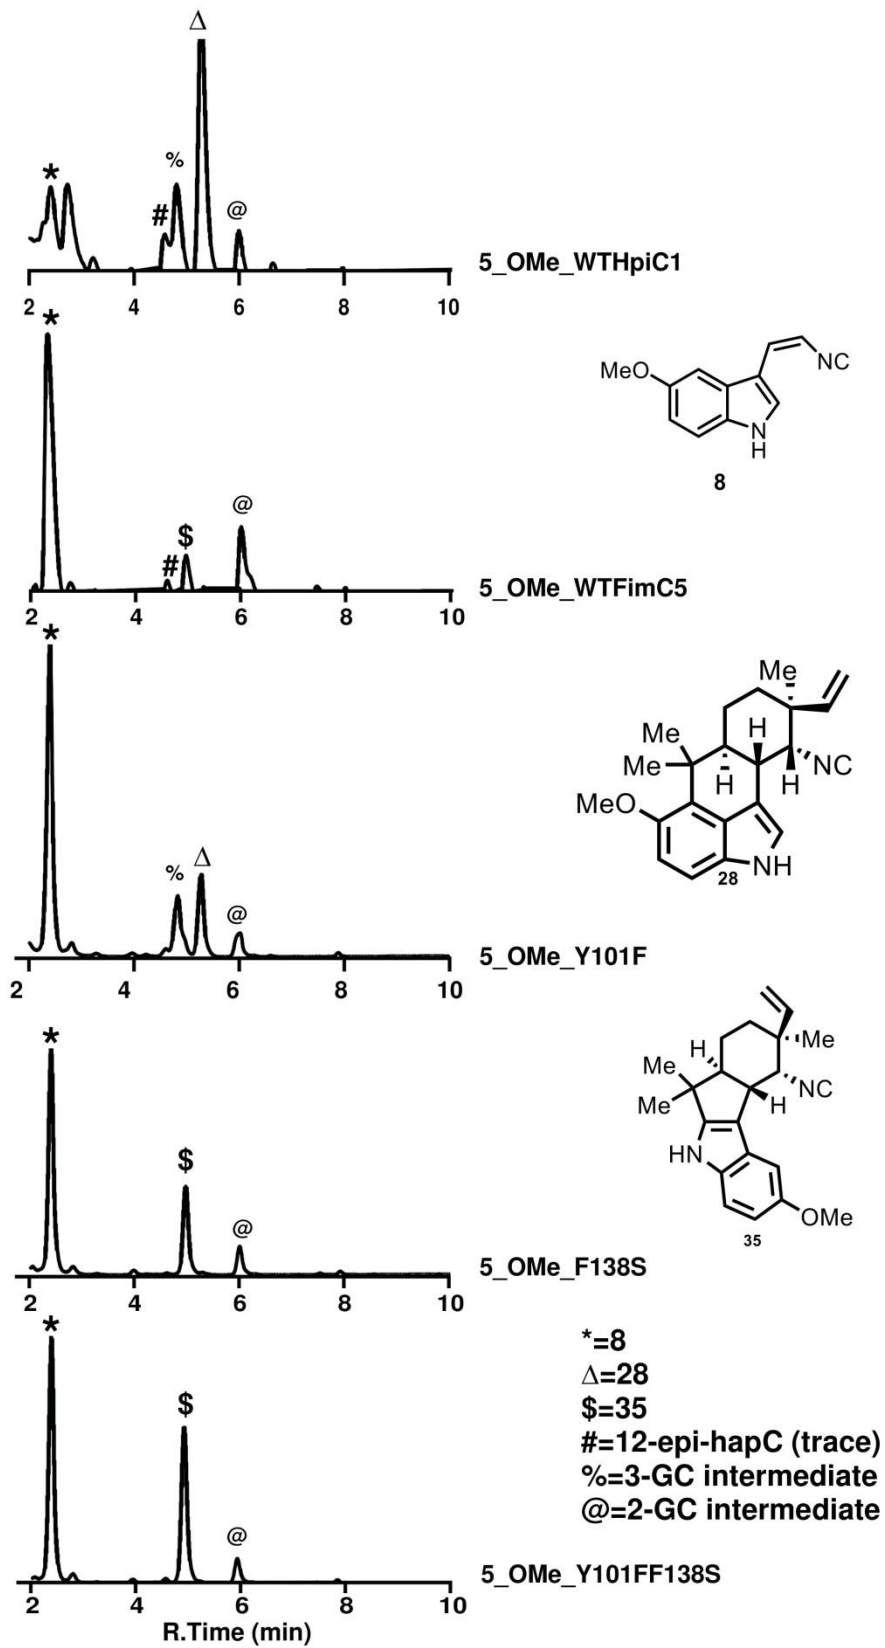

**Figure S5:** HpiC1→FimC5 mutagenesis results for substrate **8**

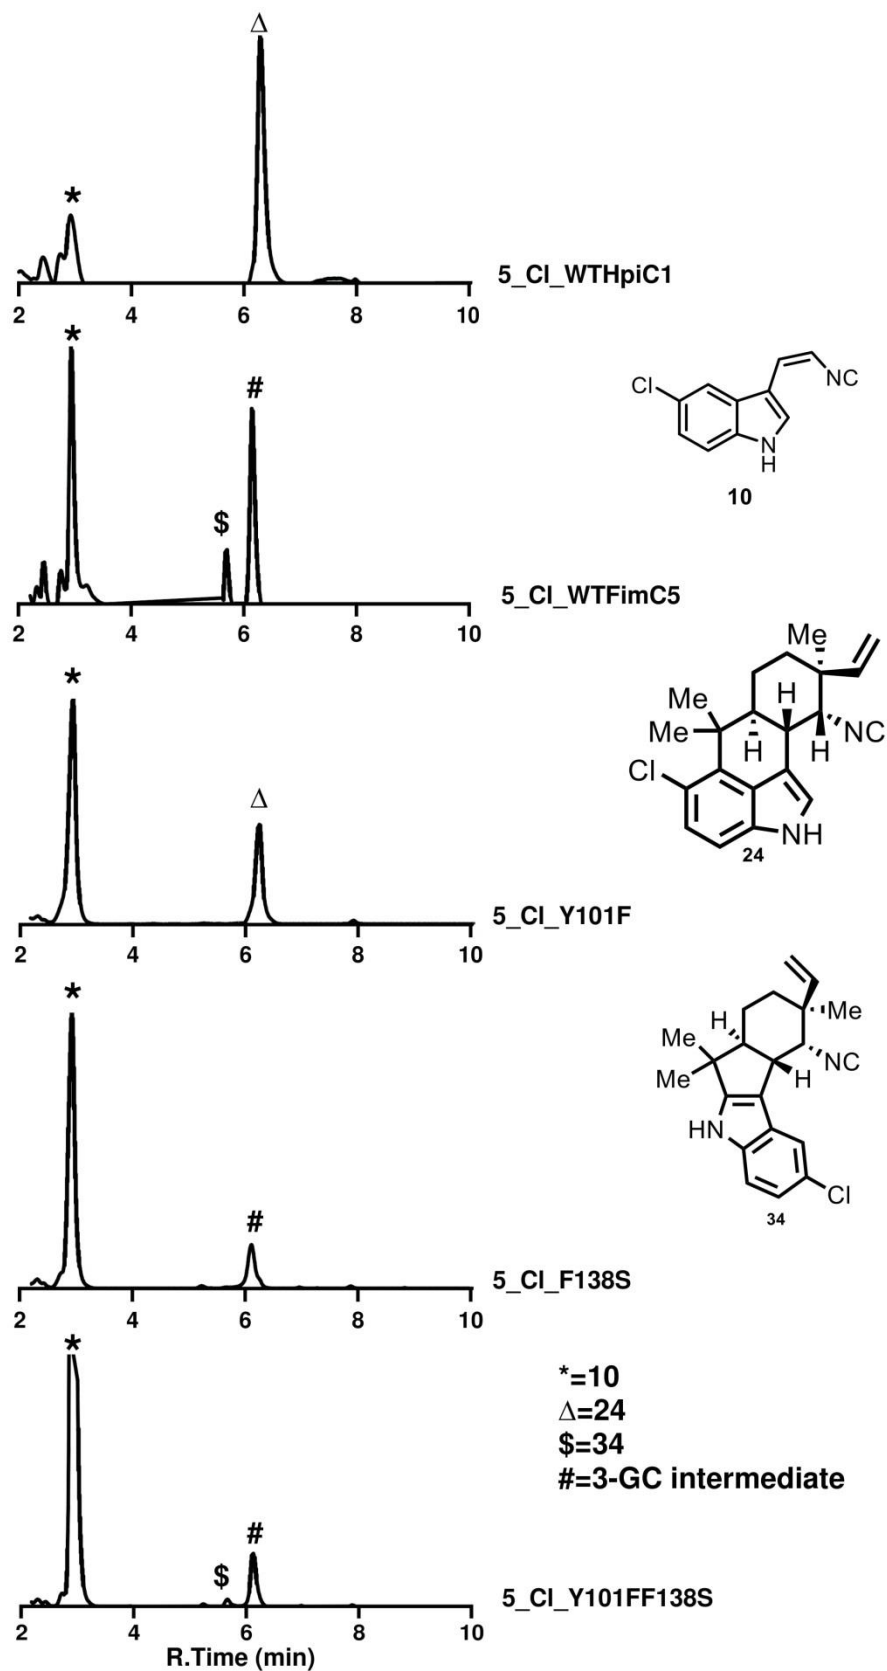

**Figure S6:** HpiC1→FimC5 mutagenesis results for substrate **10**

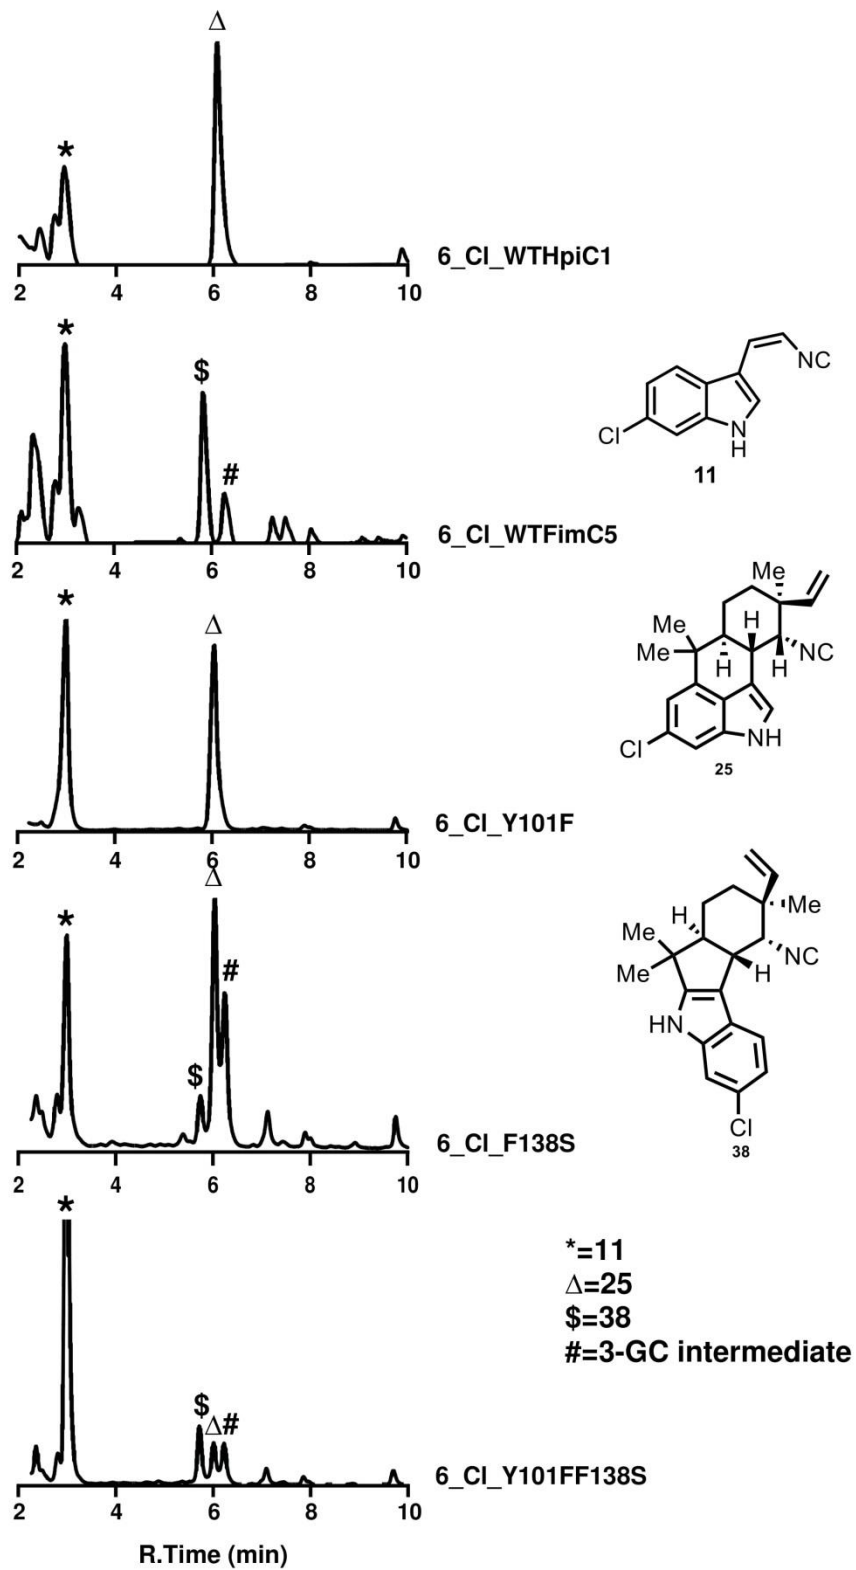

**Figure S7:** HpiC1→FimC5 mutagenesis results for substrate **11**

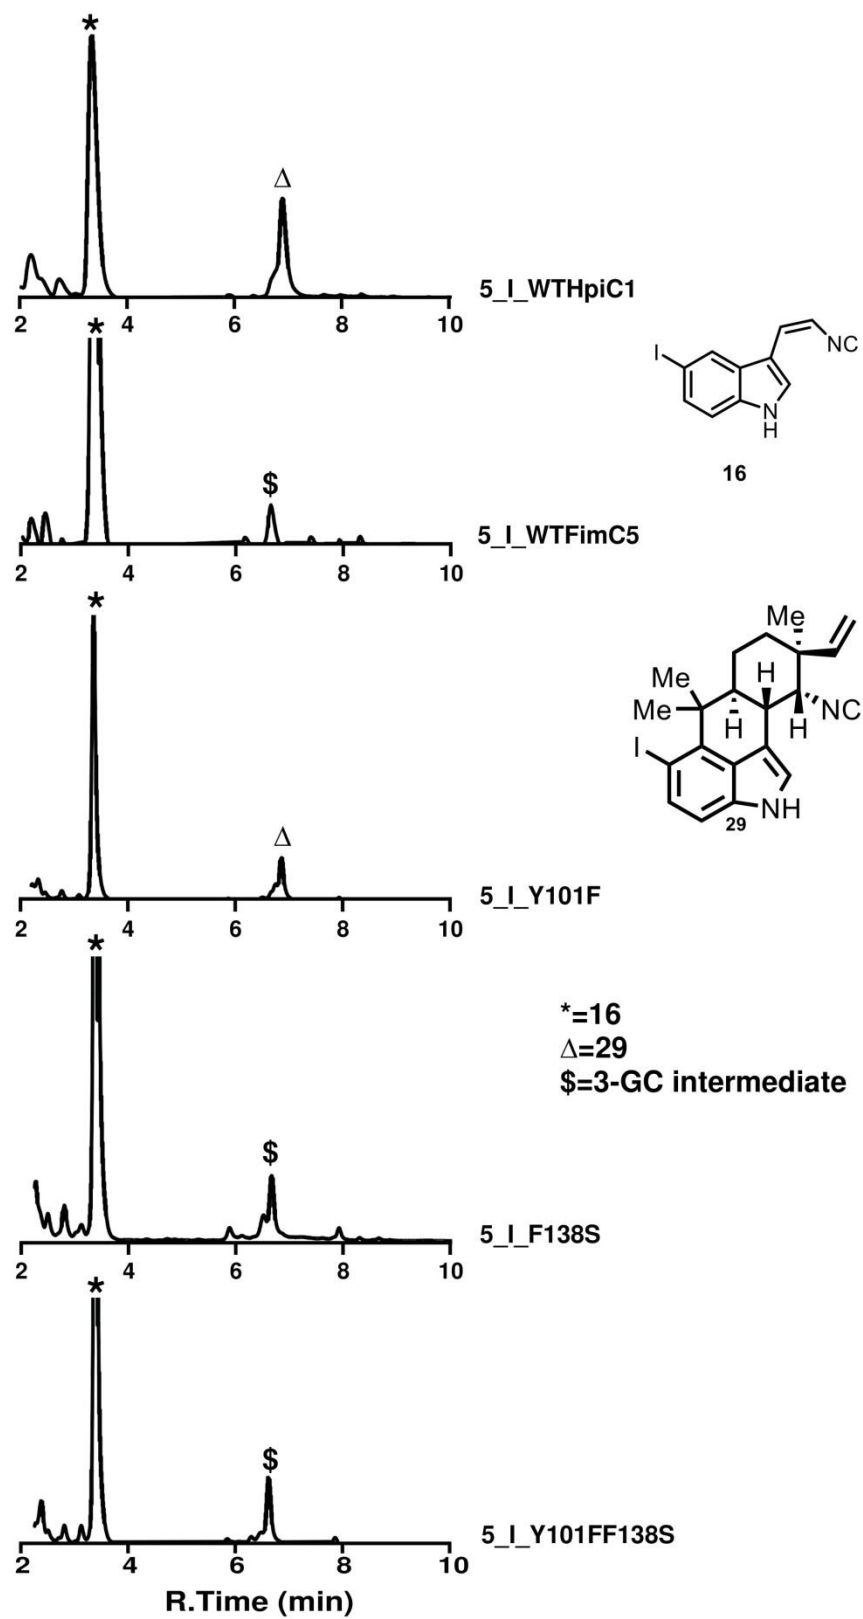

**Figure S8:** HpiC1→FimC5 mutagenesis results for substrate **16**



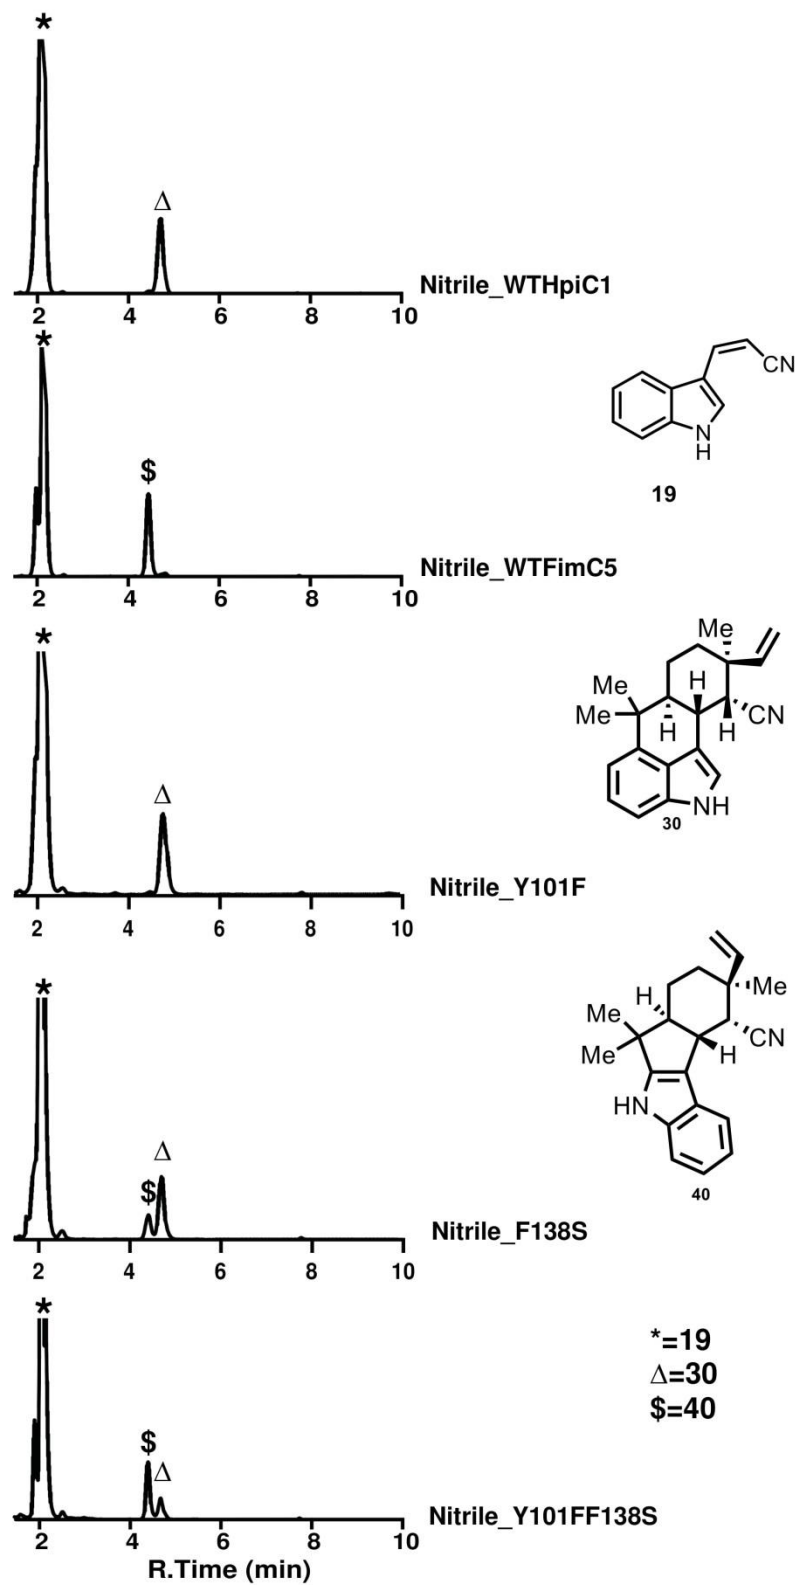

**Figure S9:** HpiC1→FimC5 mutagenesis results for substrate **19**

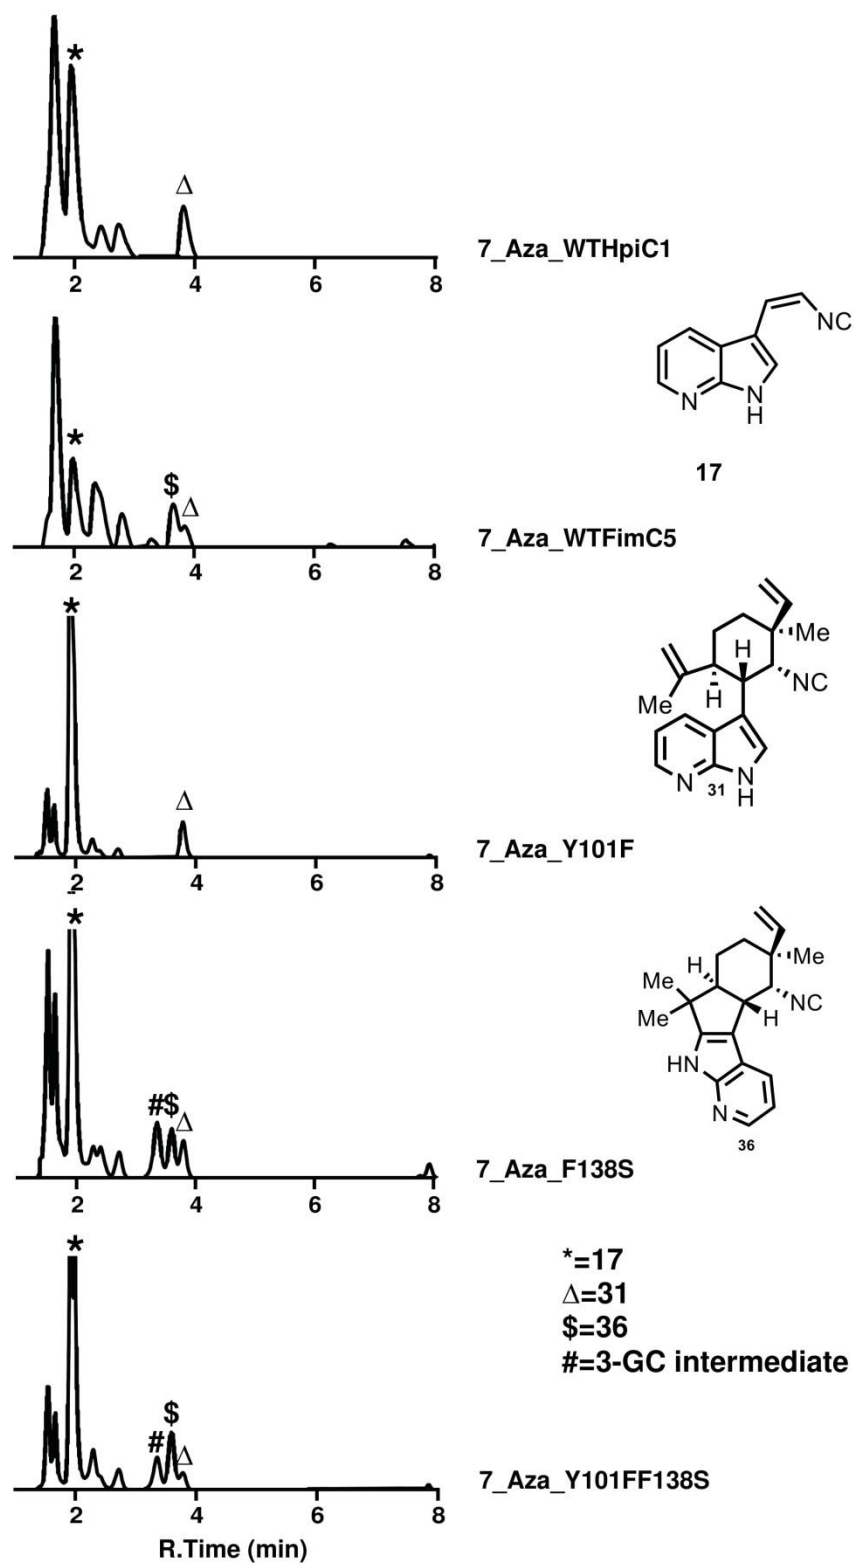

**Figure S10:** HpiC1→FimC5 mutagenesis results for substrate 17

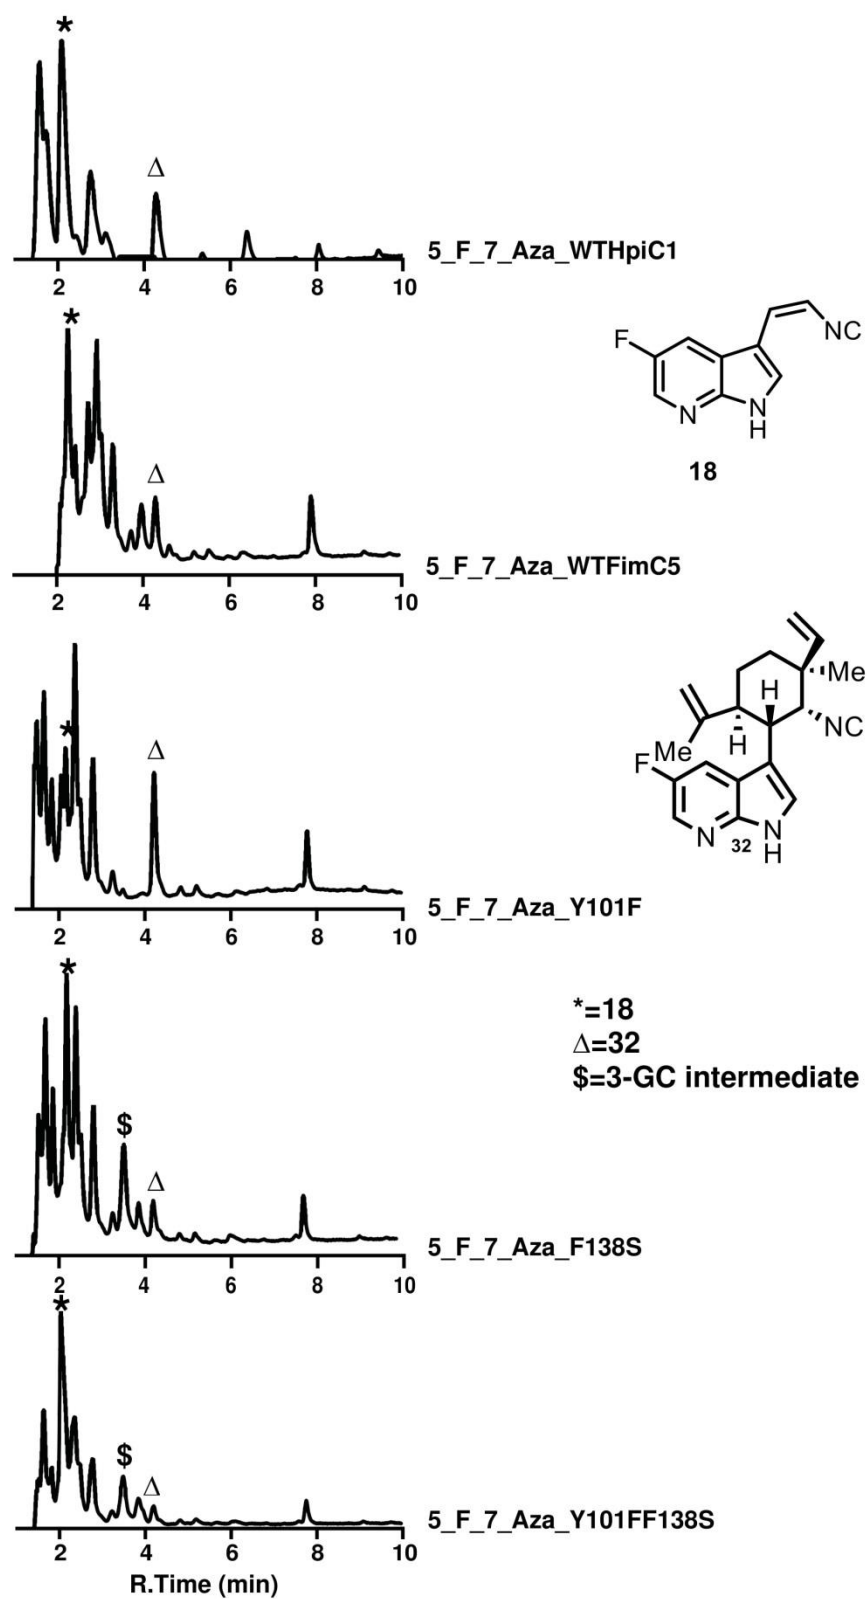

**Figure S11: HpiC1→FimC5 mutagenesis results for substrate 18**

Figures S12-S22: HpiC1→FamC1 mutagenesis HPLC traces  
Note: HPLC traces do not represent best possible conversion

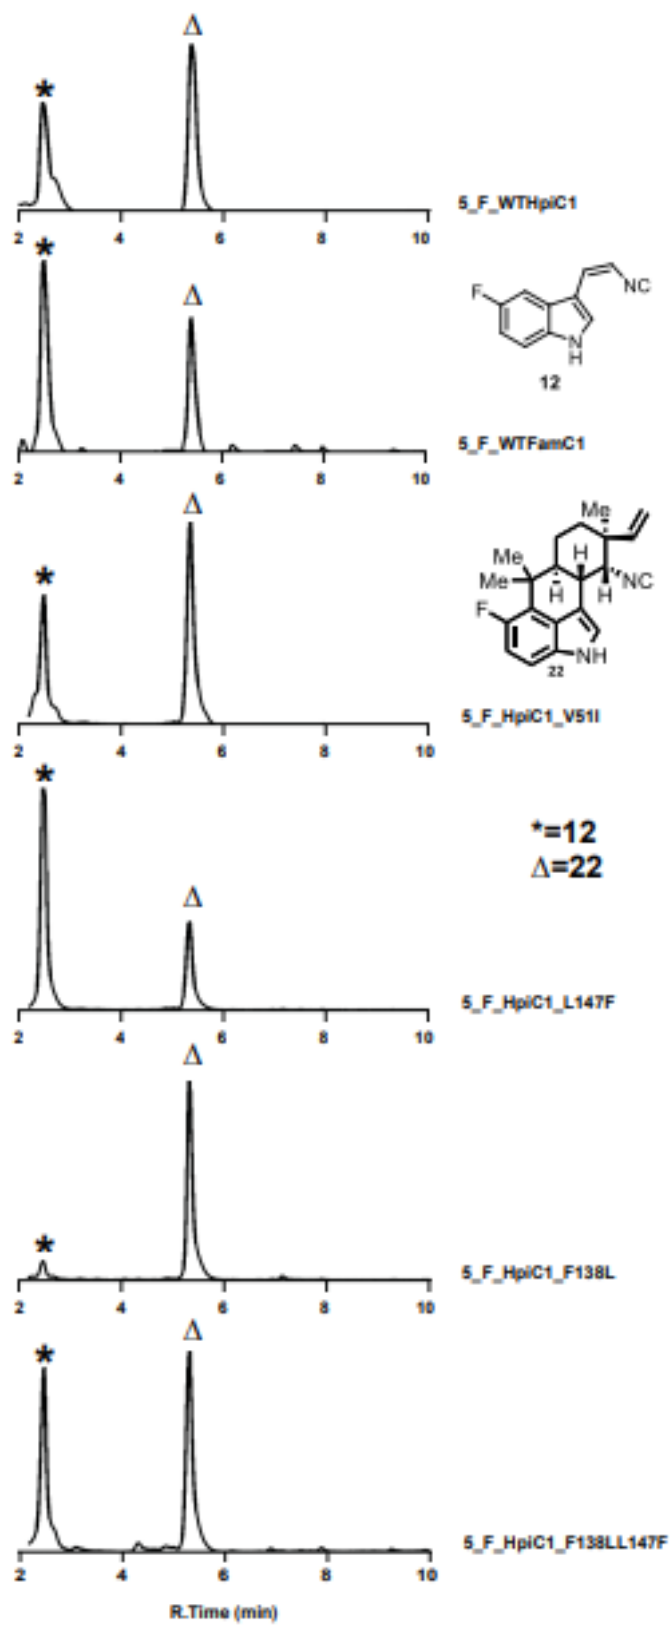

Figure S12: HpiC1→FamC1 mutagenesis results for substrate 12

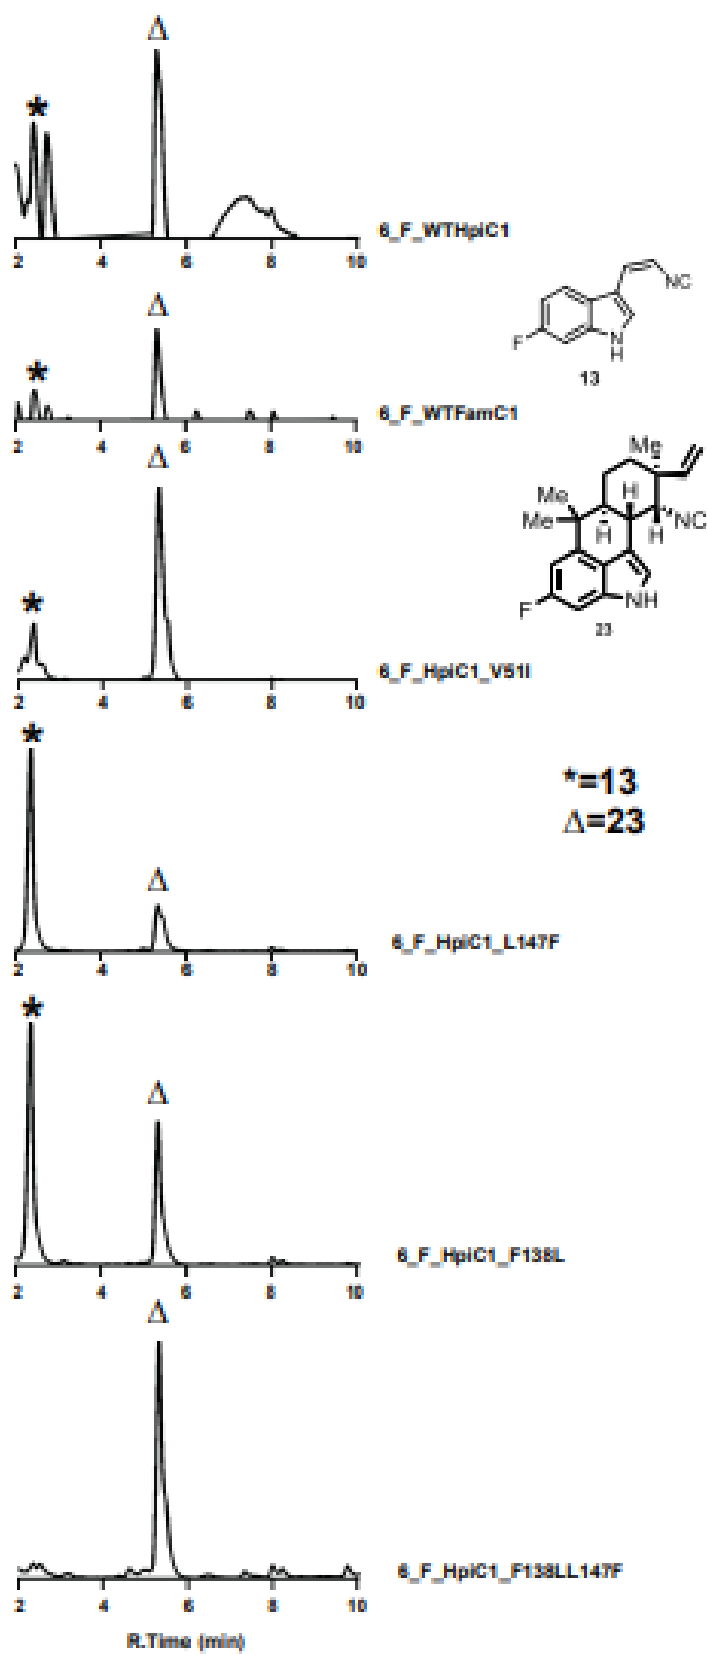

**Figure S13:** HpiC1→FamC1 mutagenesis results for substrate 13

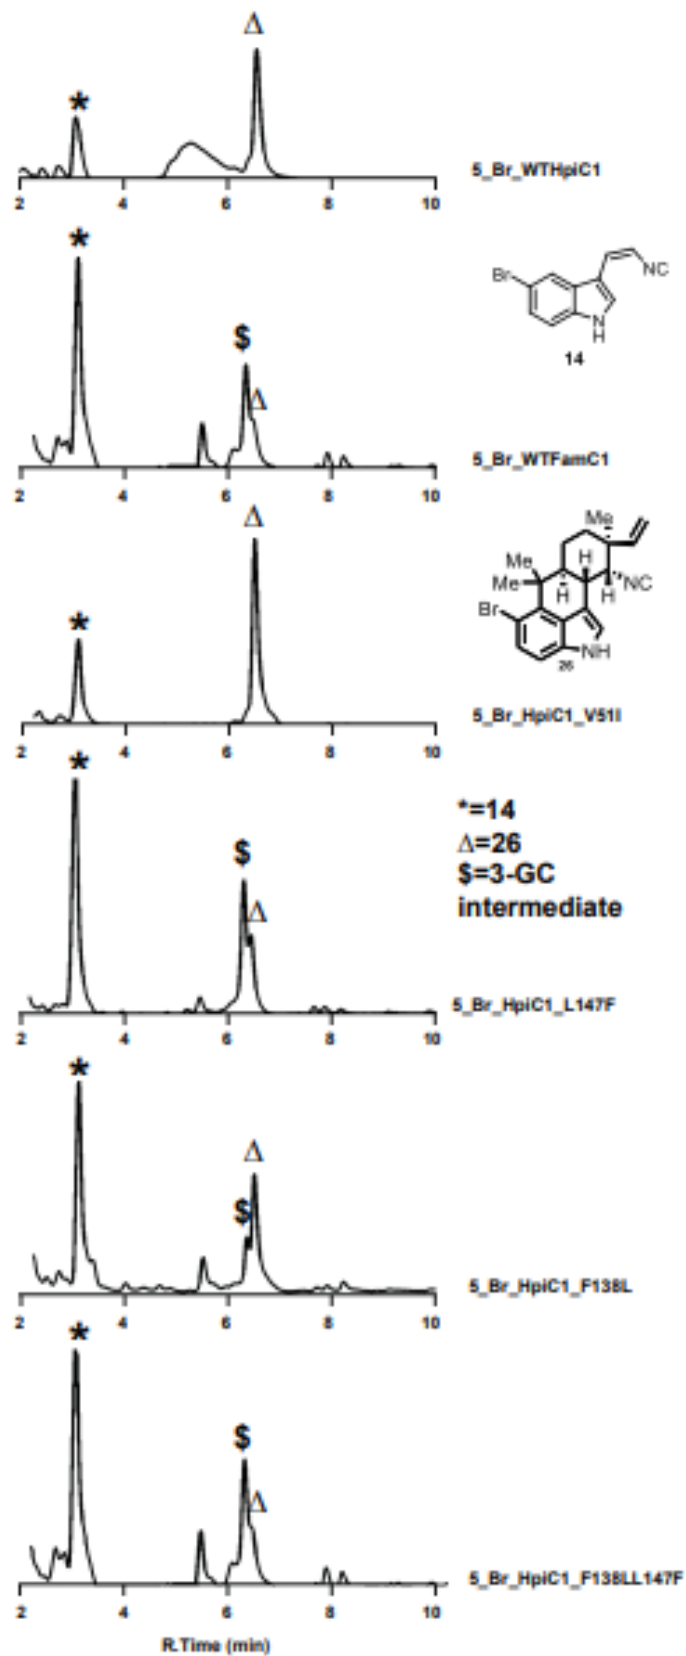

**Figure S14:** HpiC1→FamC1 mutagenesis results for substrate **14**

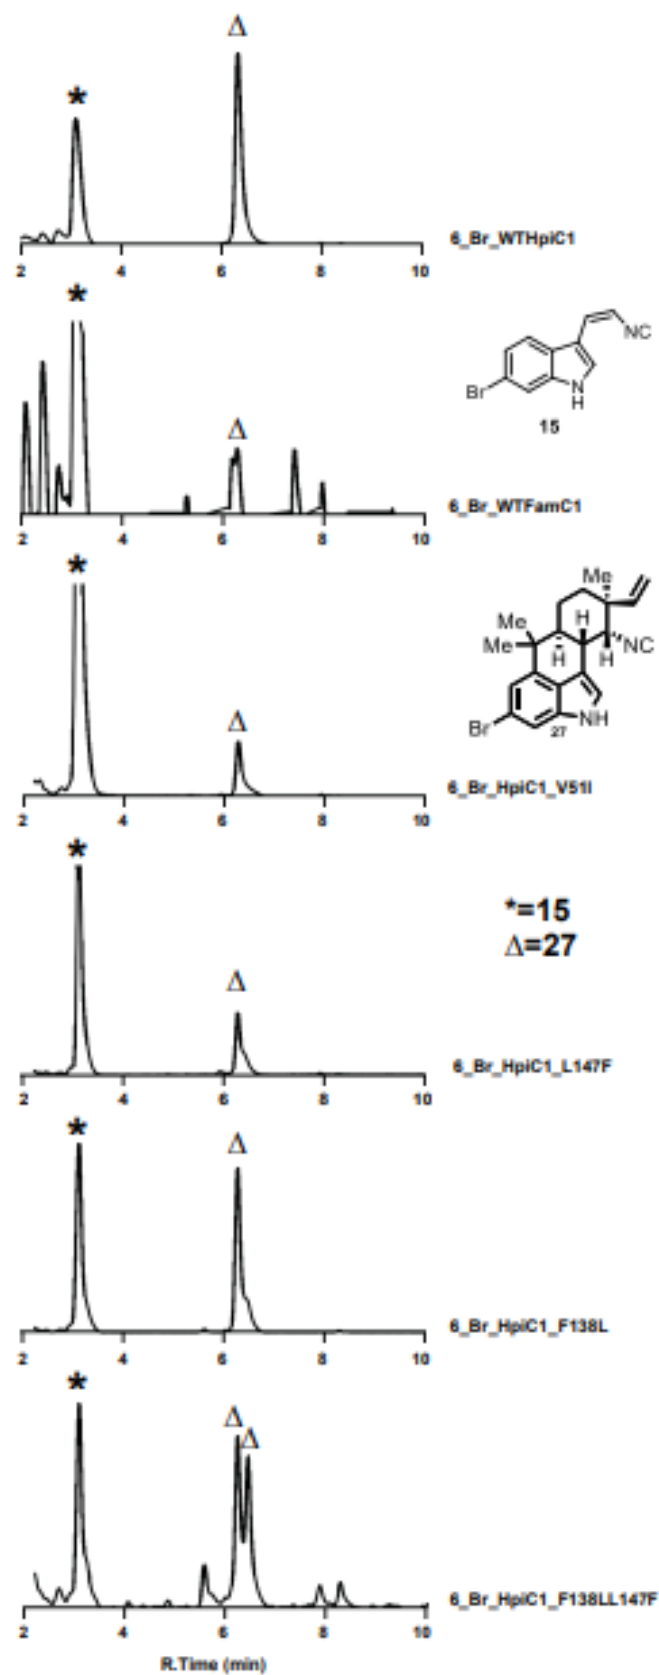

Figure S15: HpiC1 → FamC1 mutagenesis results for substrate 15

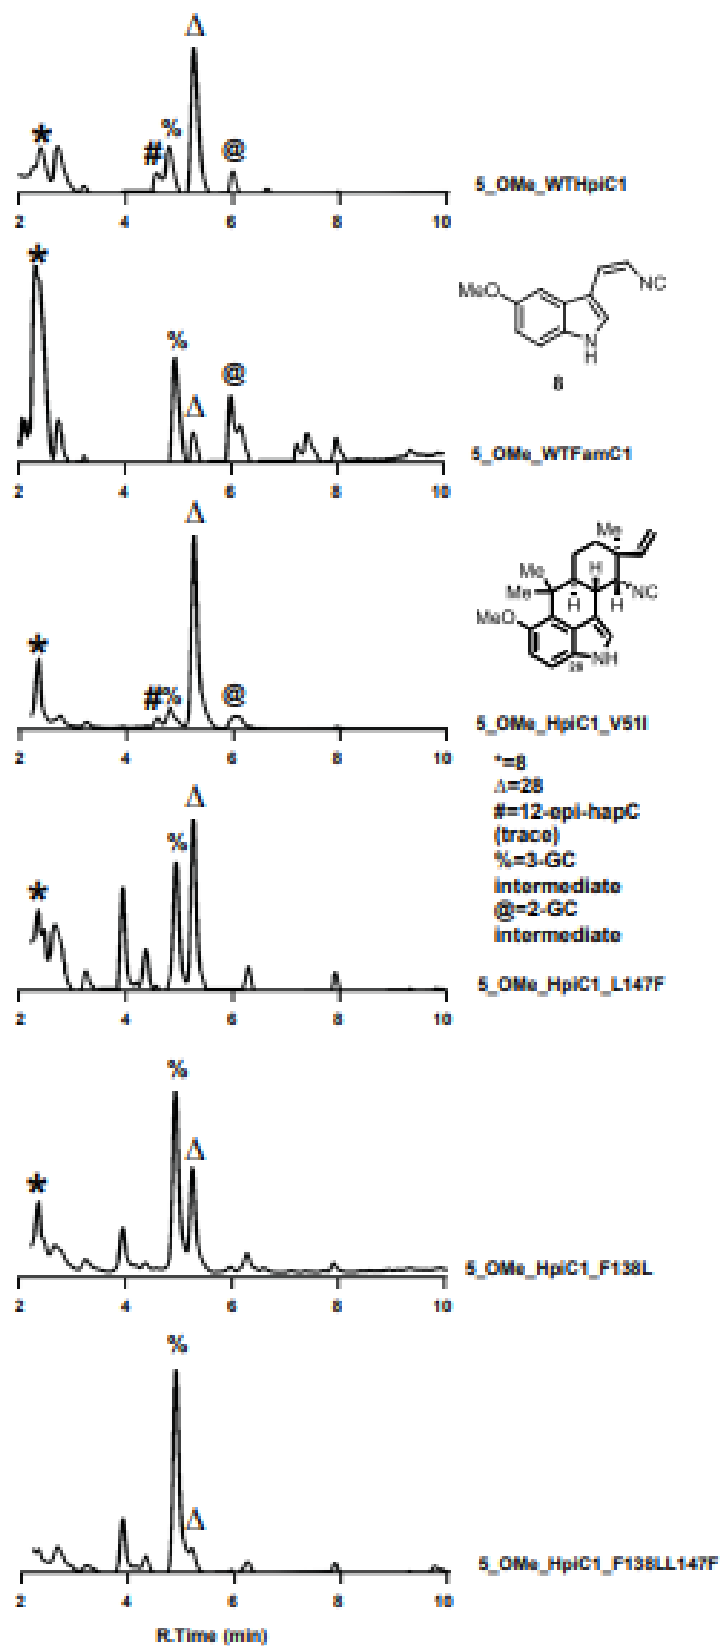

**Figure S16:** HpiC1→FamC1 mutagenesis results for substrate **8**



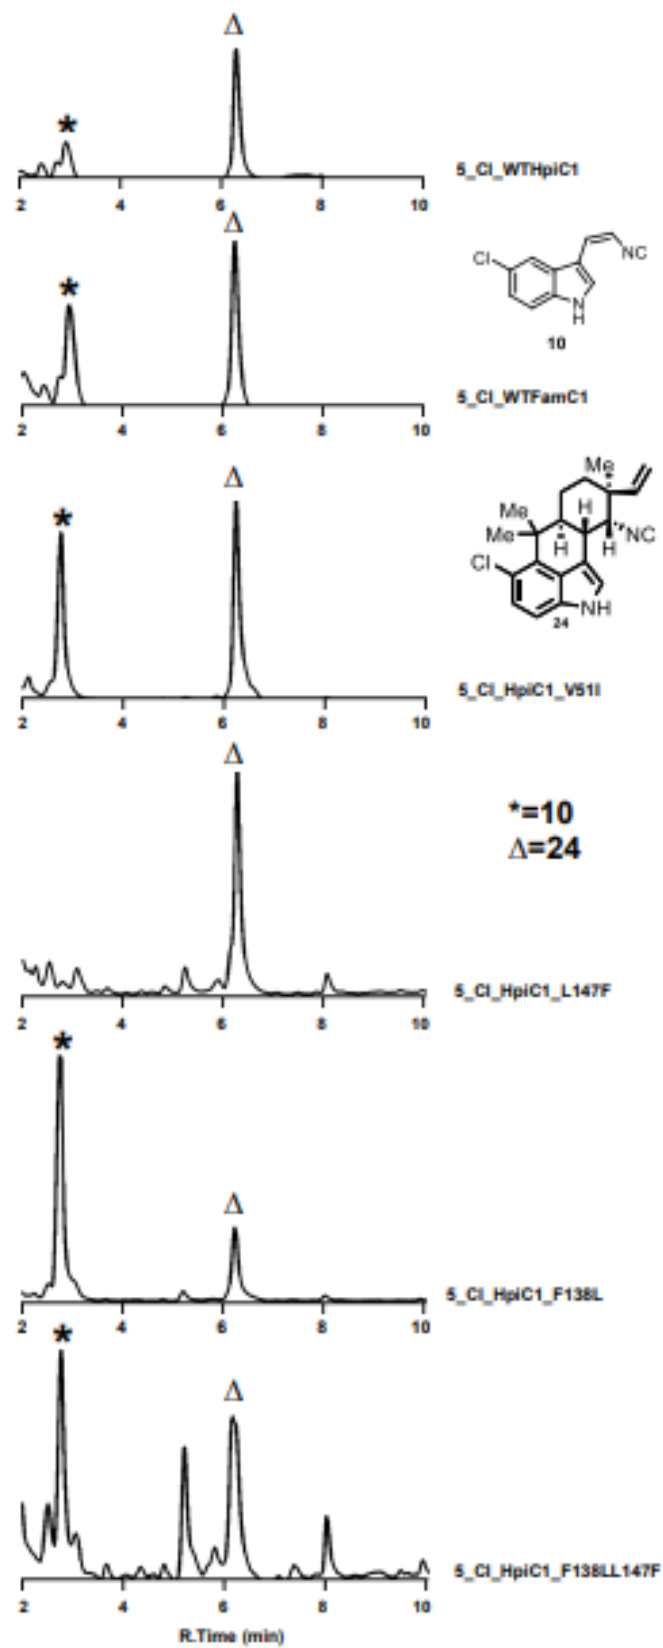

**Figure S17:** HpiC1→FamC1 mutagenesis results for substrate **10**

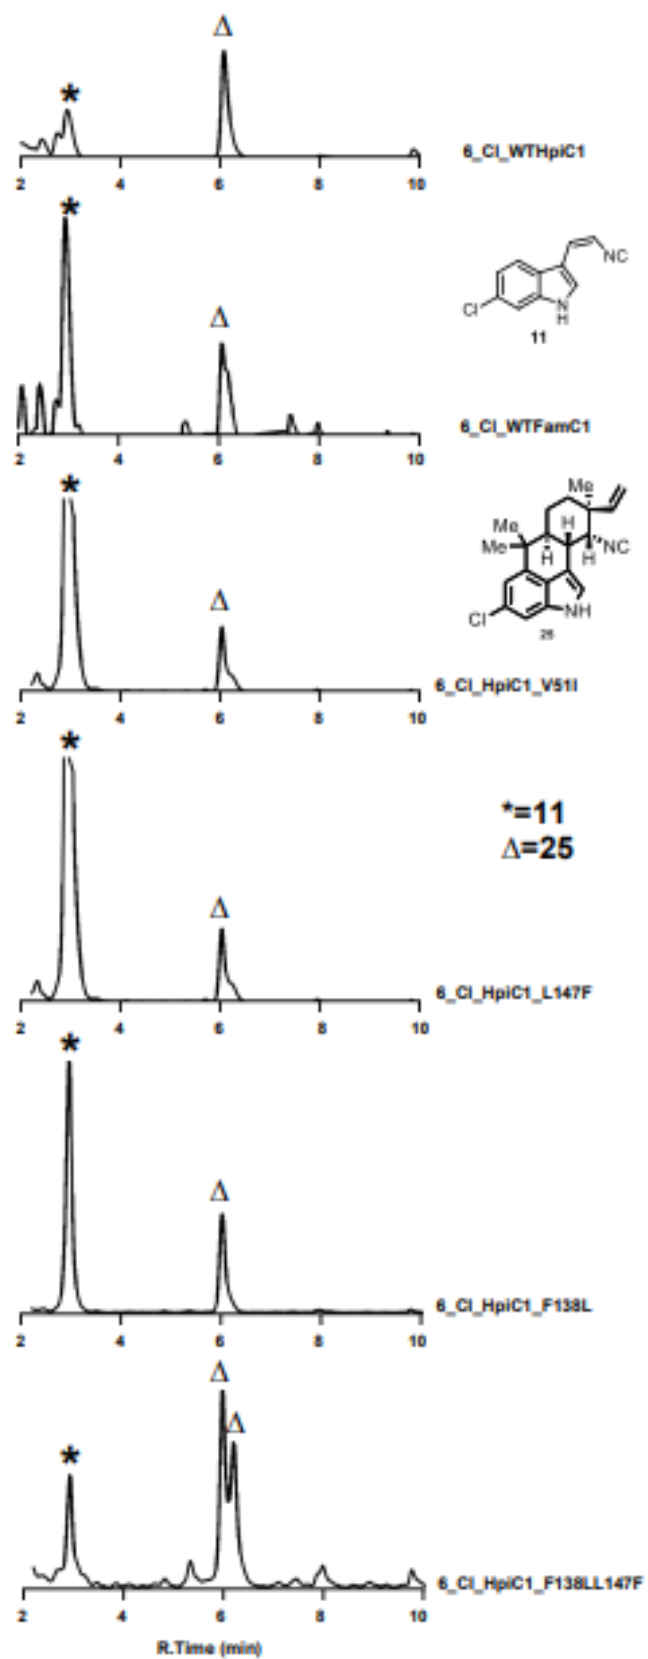

**Figure S18:** HpiC1→FamC1 mutagenesis results for substrate 11

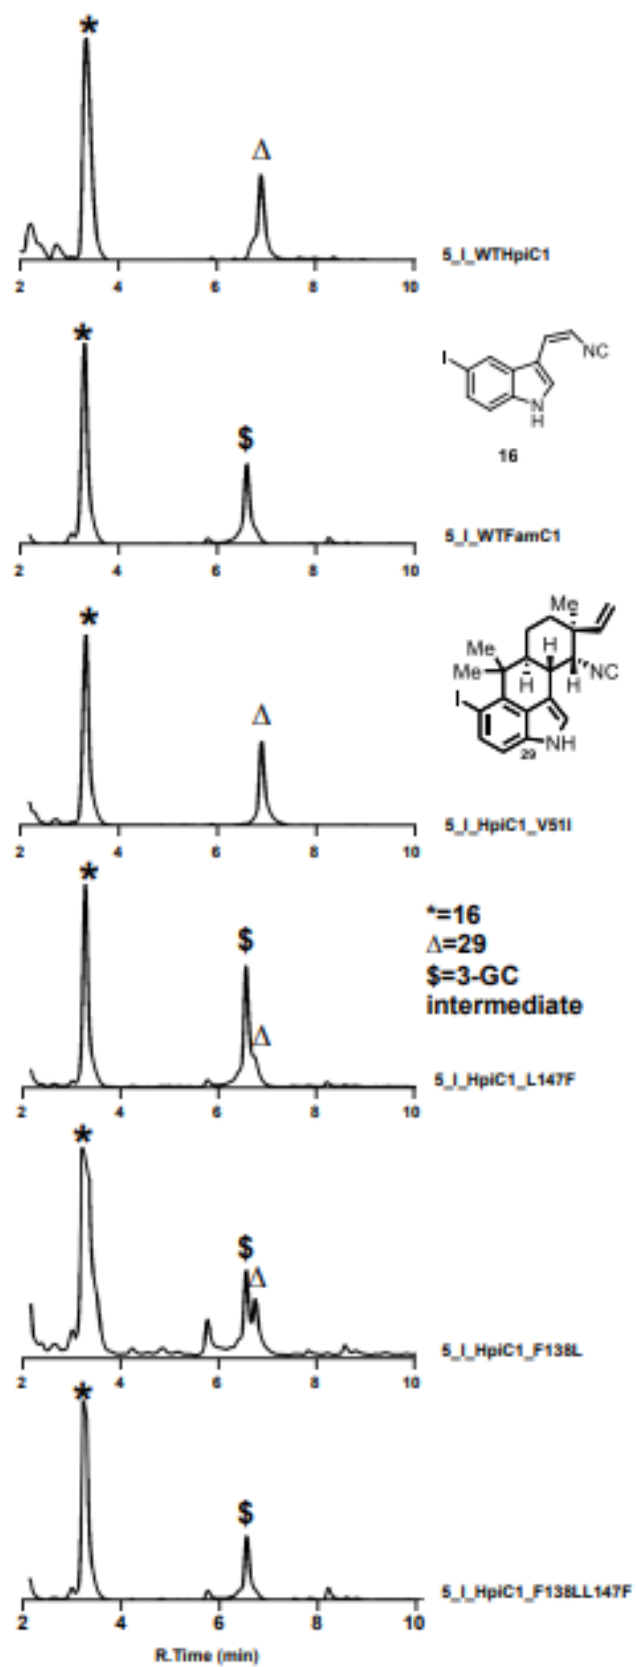

**Figure S19:** HpiC1 → FamC1 mutagenesis results for substrate **16**

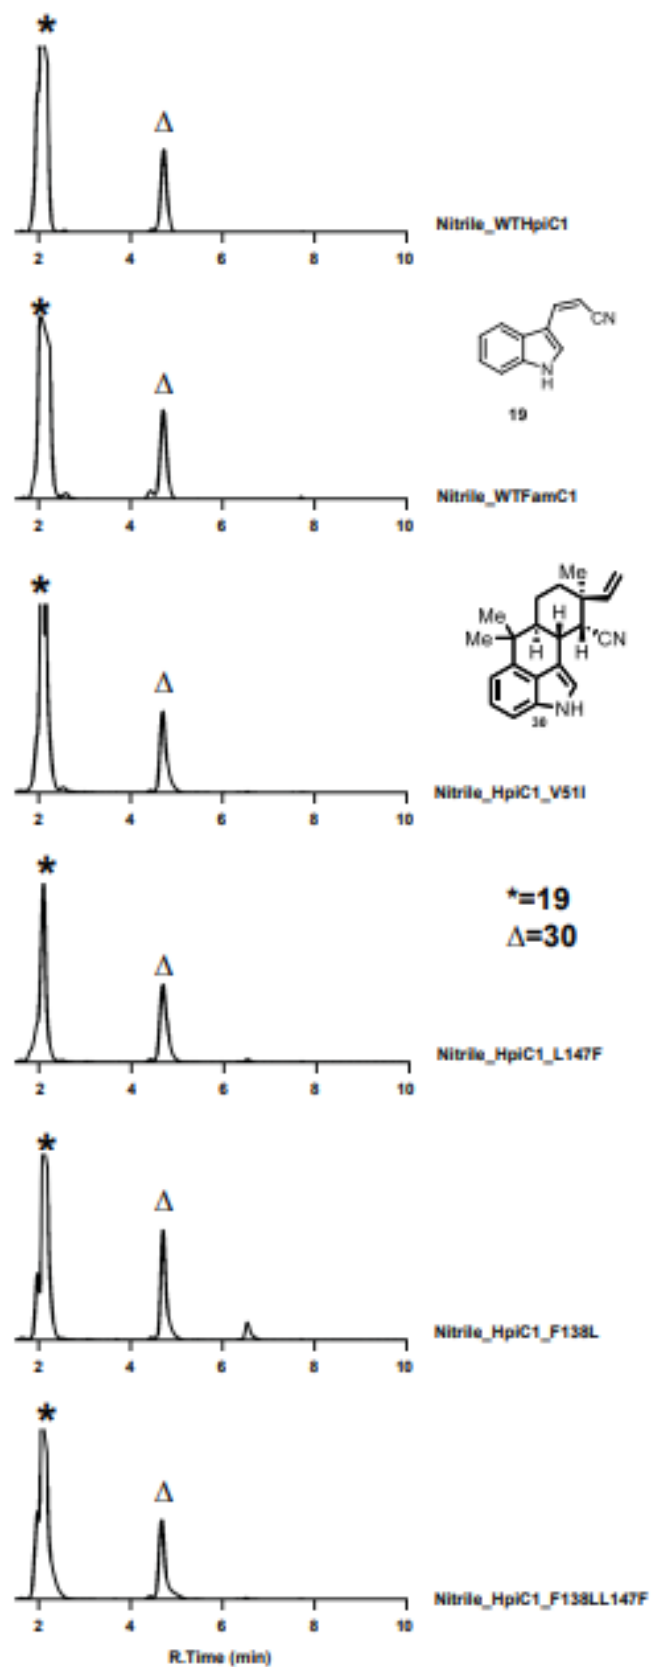

**Figure S20:** HpiC1  $\rightarrow$  FamC1 mutagenesis results for substrate **19**

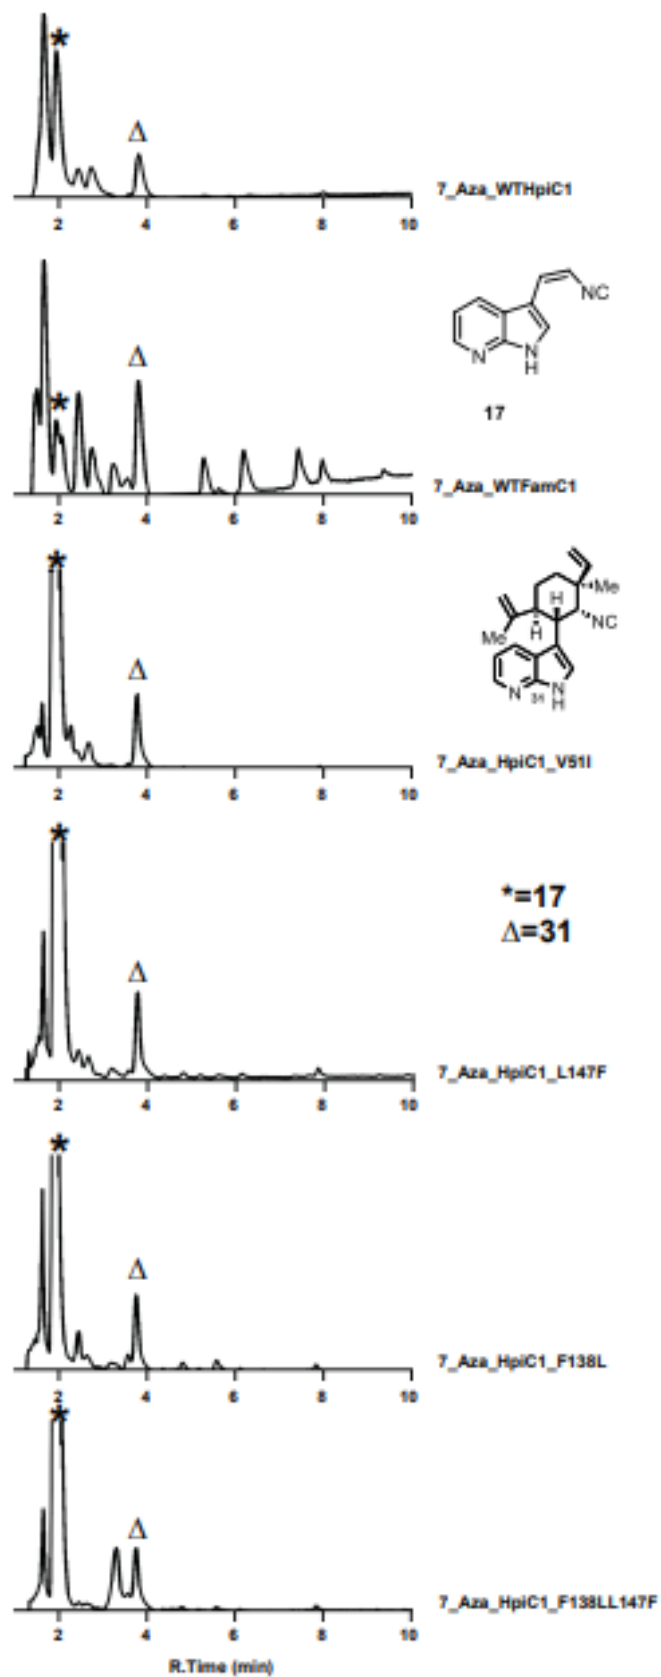

**Figure S21:** HpiC1 → FamC1 mutagenesis results for substrate **17**

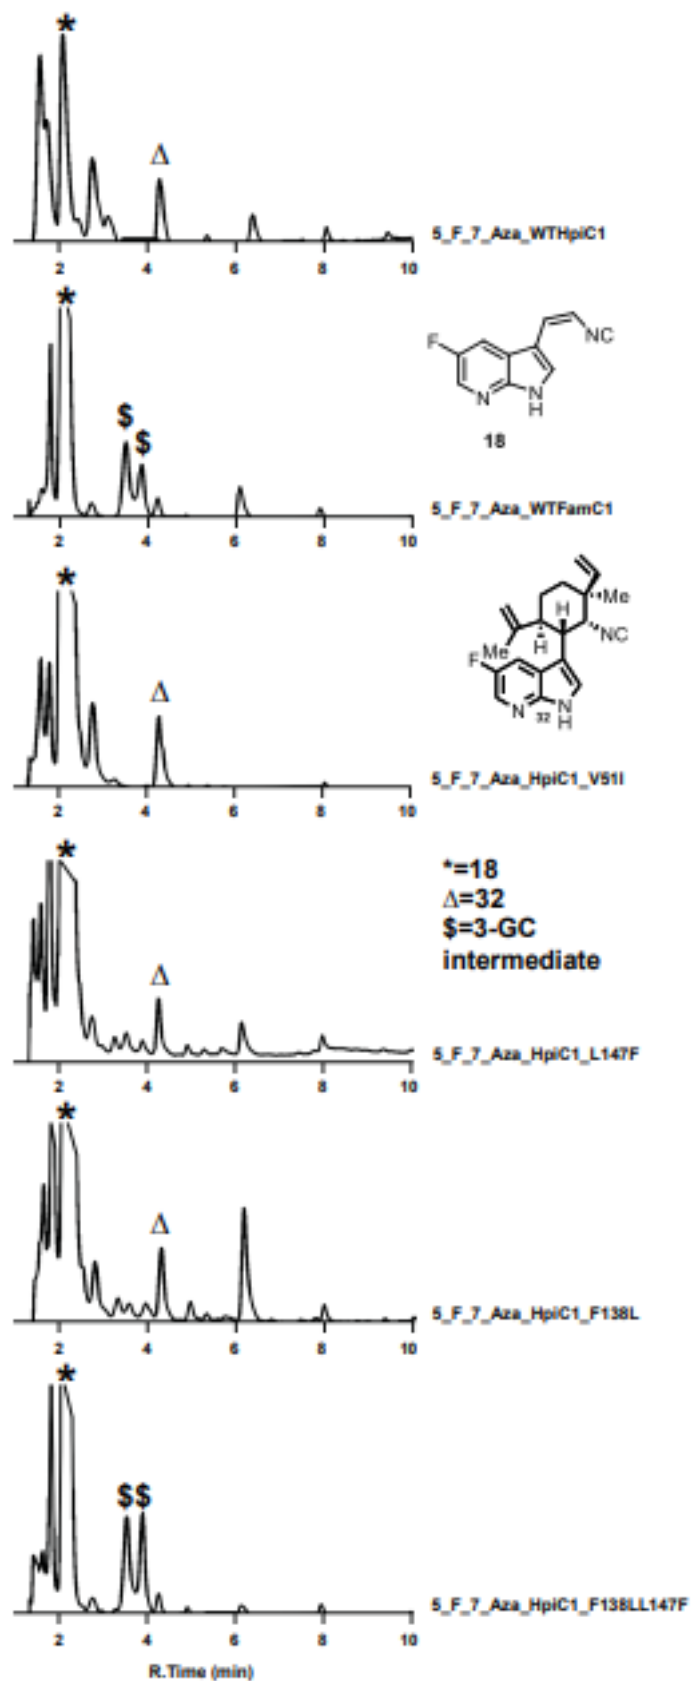

**Figure S22:** HpiC1 → FamC1 mutagenesis results for substrate **18**

## Spectra Section

<sup>1</sup>H and <sup>13</sup>CNMR spectra and HRMS of 5-F-12-*epi*-Hapalindole U (**22**)  
Full characterization data<sup>1</sup>

<sup>1</sup>H and <sup>13</sup>CNMR spectra and HRMS of 6-F-12-*epi*-Hapalindole U (**23**)  
Full characterization data<sup>1</sup>

$^1\text{H}$ ,  $^{13}\text{C}$ , COSY, HSQC, HMBC NMR spectra and HRMS of 5-Br-12-*epi*-Hapalindole U (**26**) in  $\text{C}_6\text{D}_6$  at 600 MHz and 125 MHz respectively.

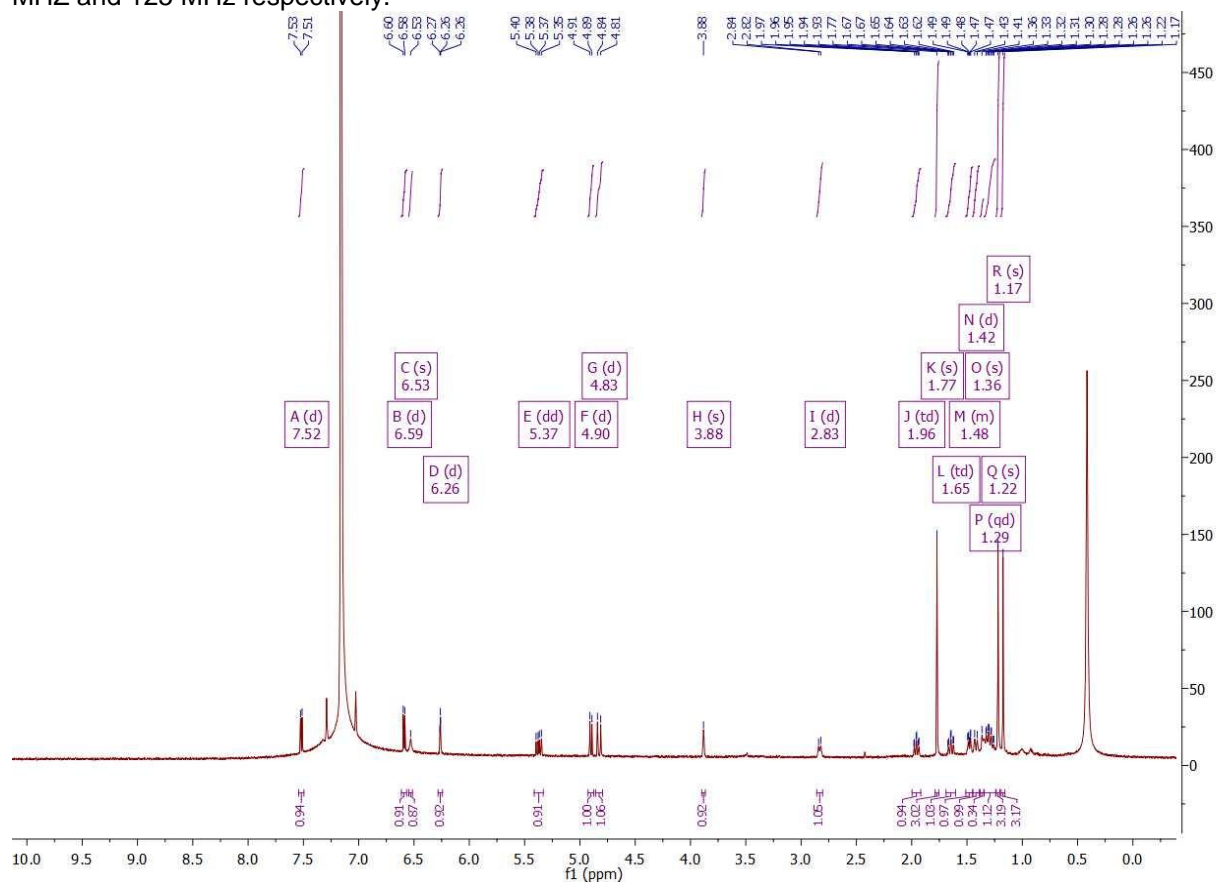



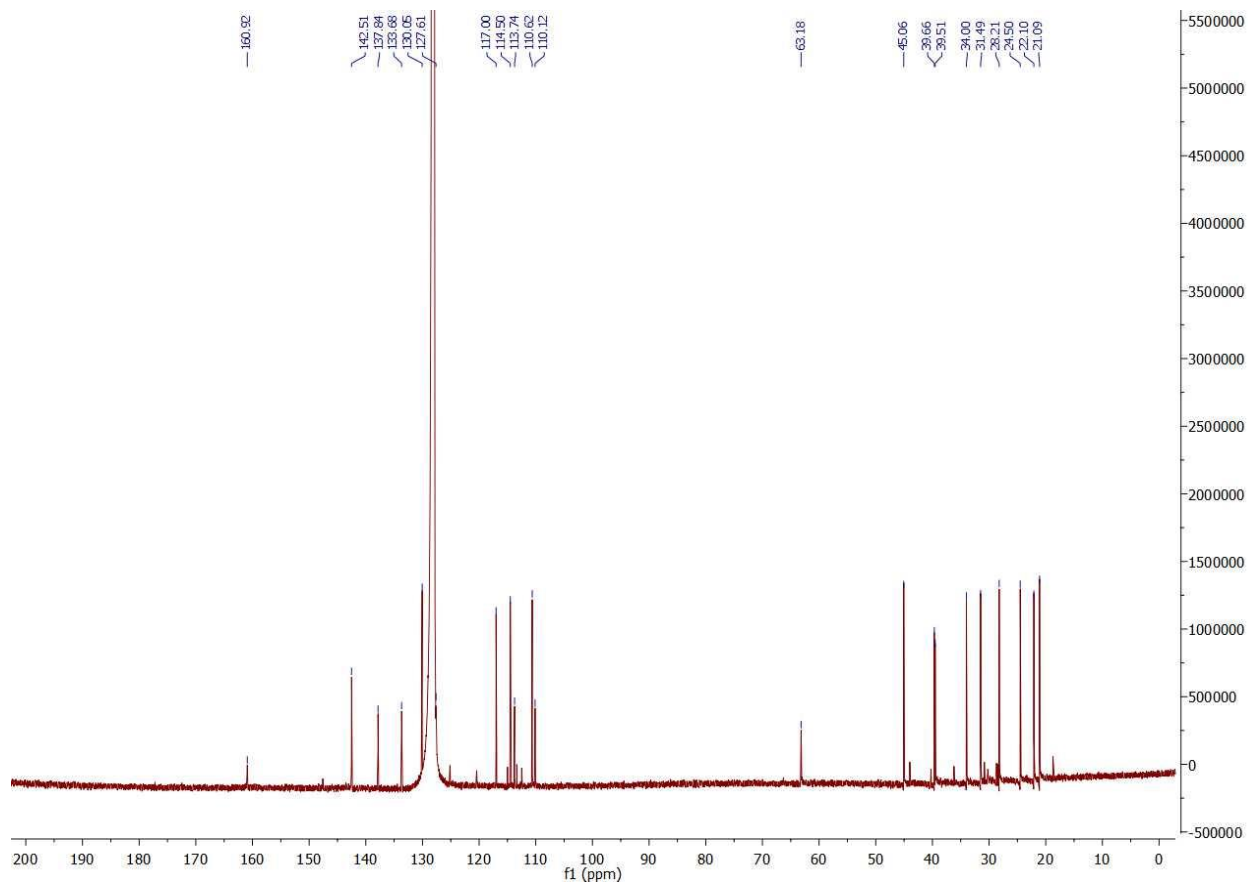

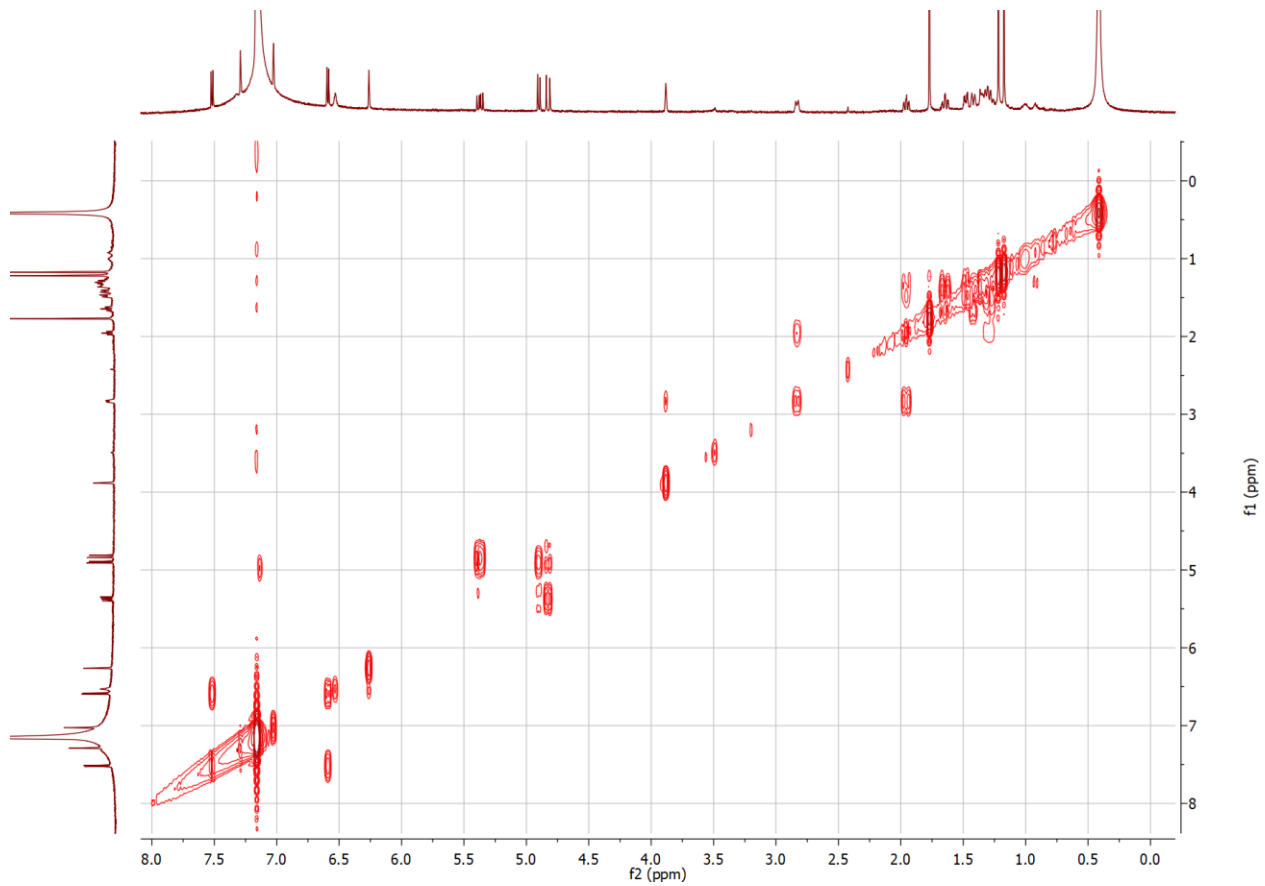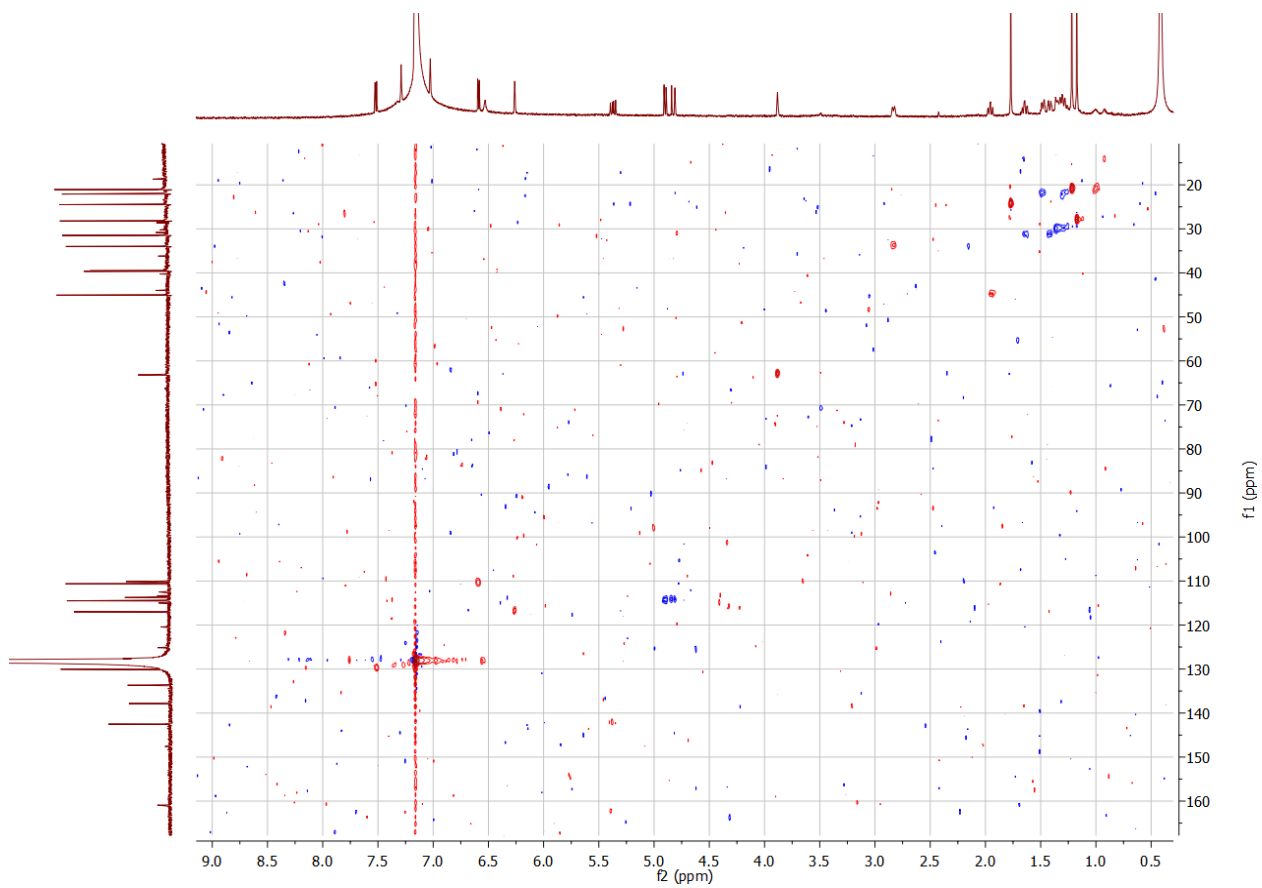

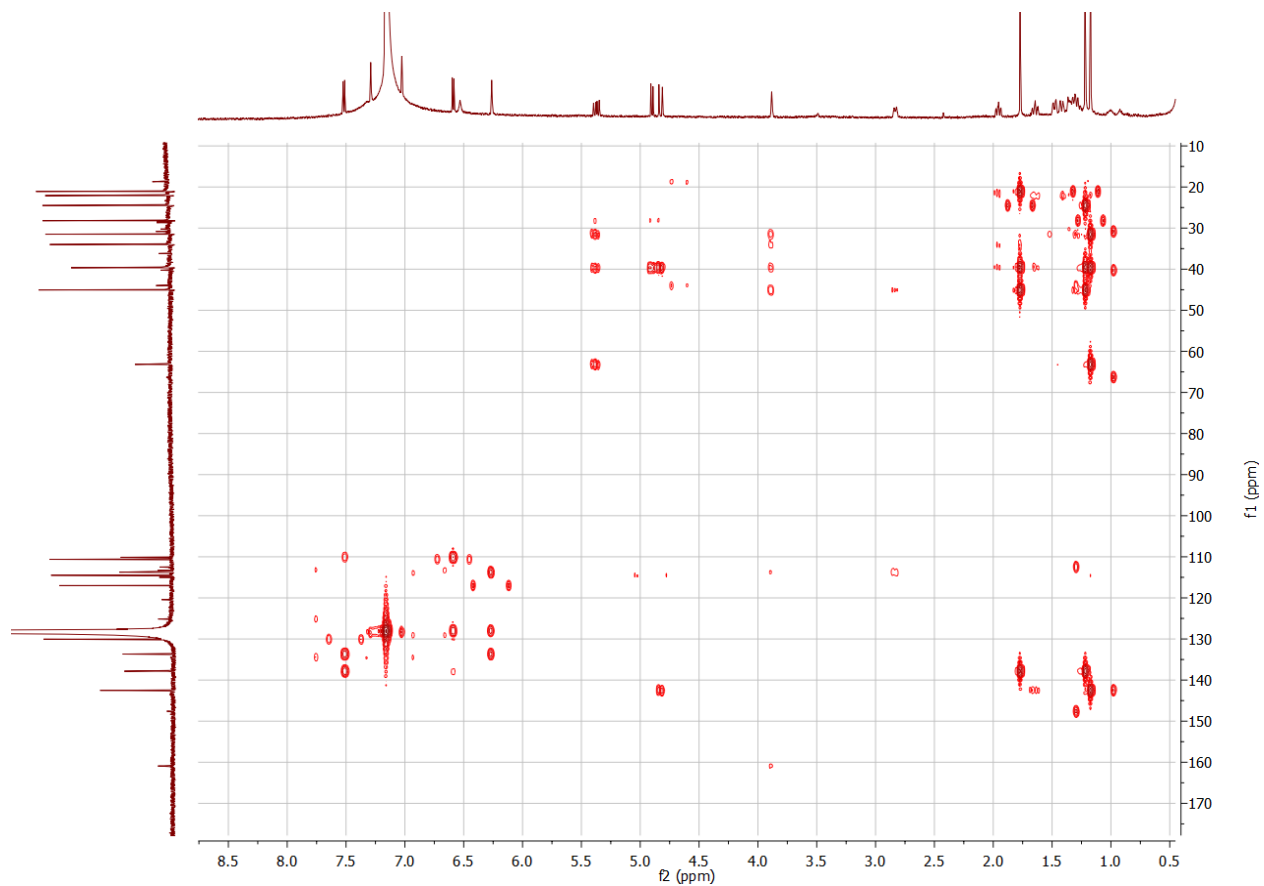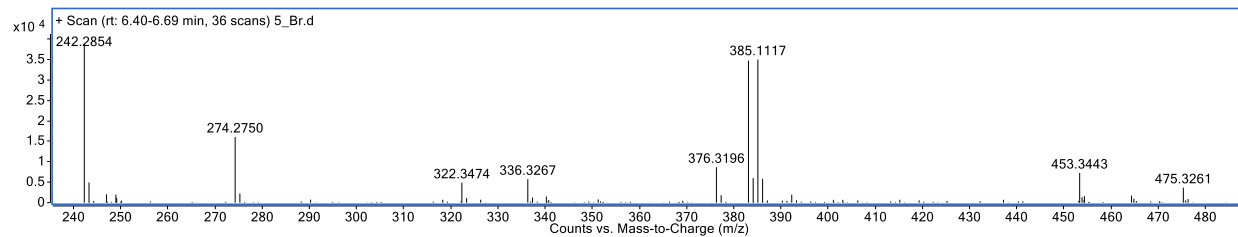

Calc. [M+H]<sup>+</sup> 383.1117 Obsv. 383.1117

$^1\text{H}$ ,  $^{13}\text{C}$ , COSY, HSQC, HMBC NMR spectra and HRMS of 6-Br-12-*epi*-Hapalindole U (**27**) in  $\text{C}_6\text{D}_6$  at 800 MHz and 201 MHz respectively.

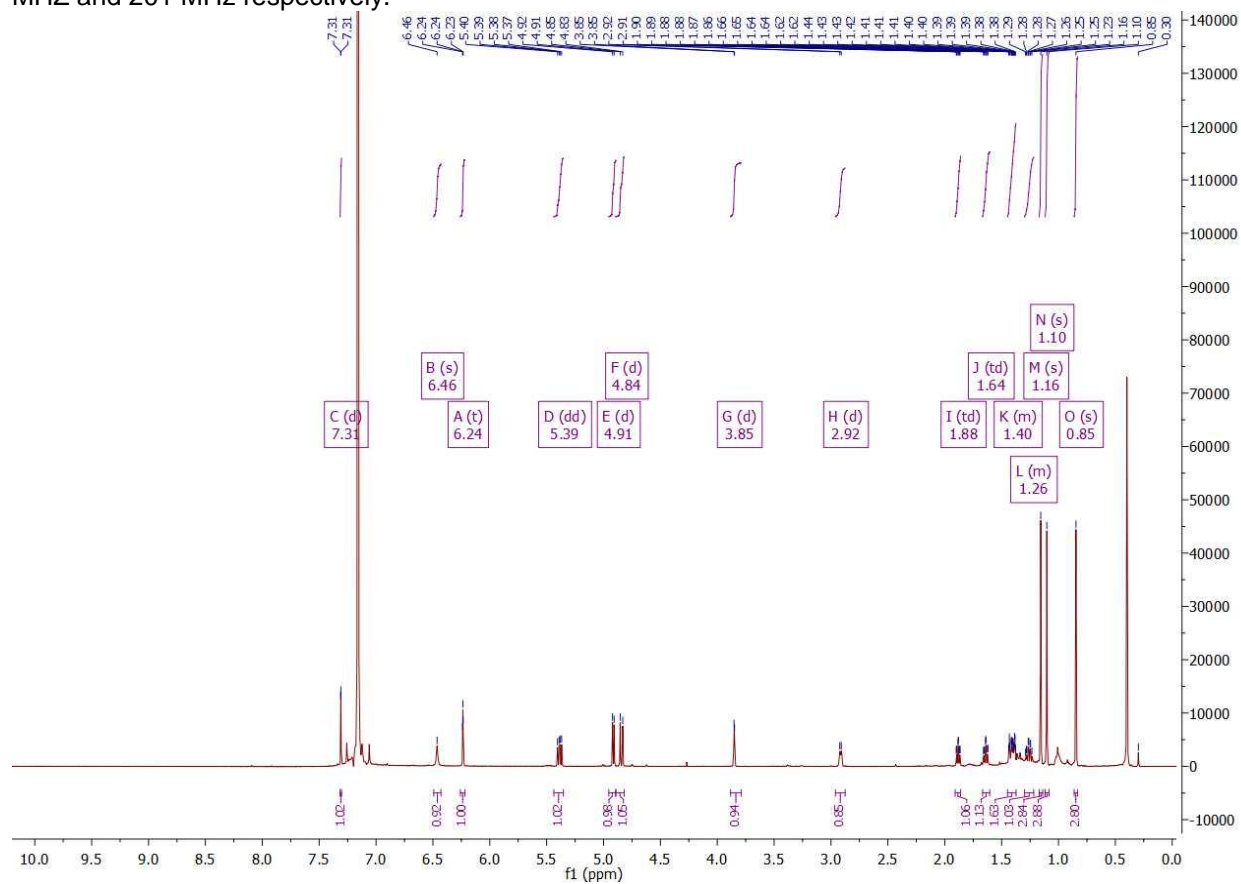

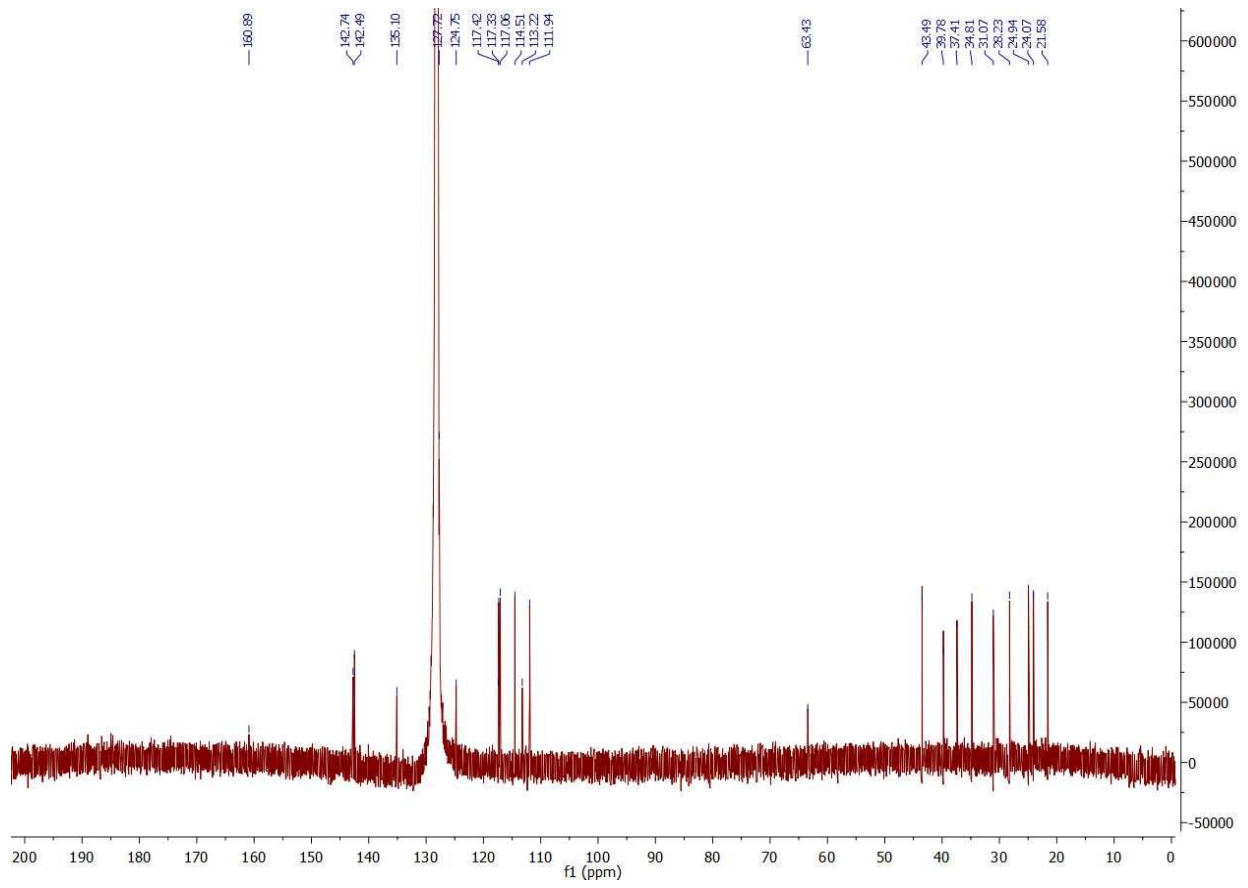

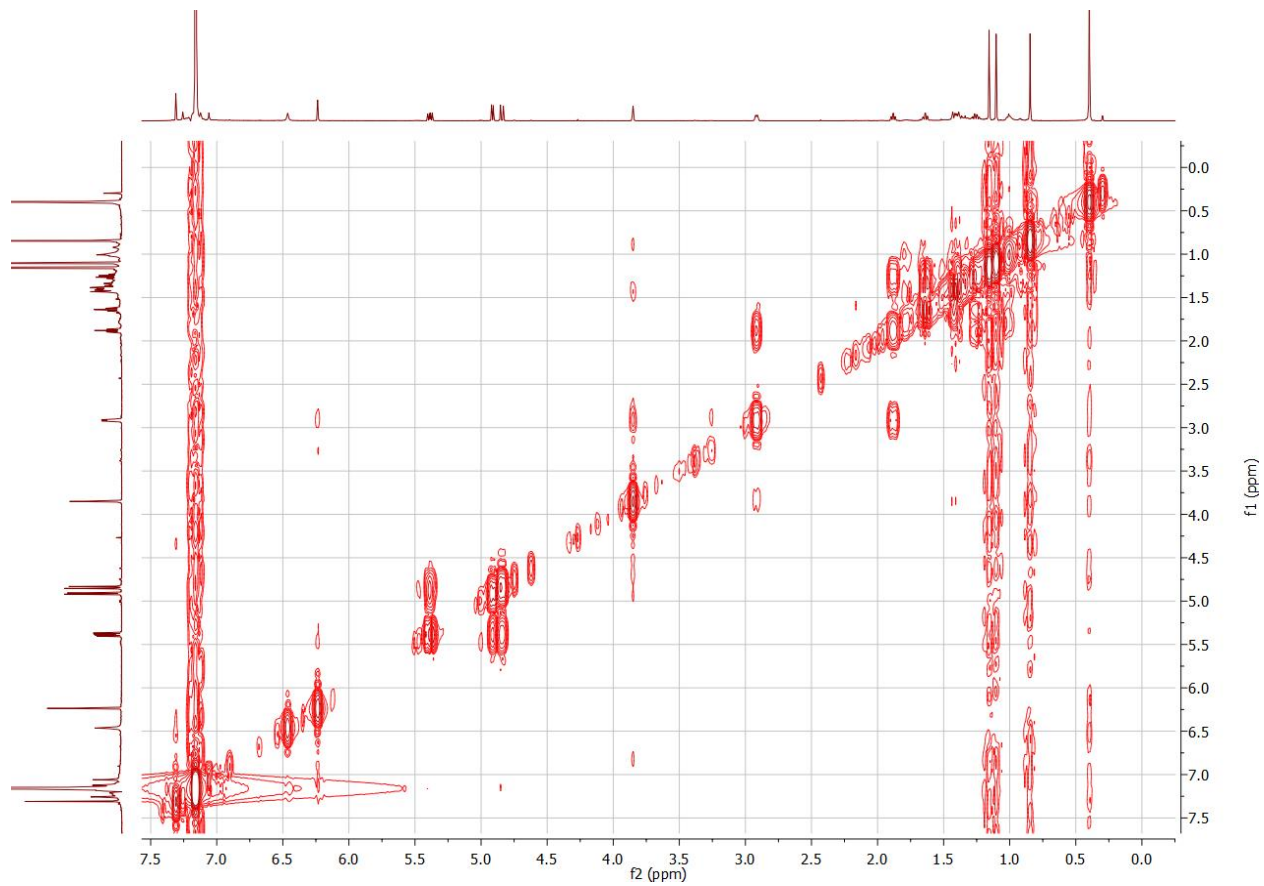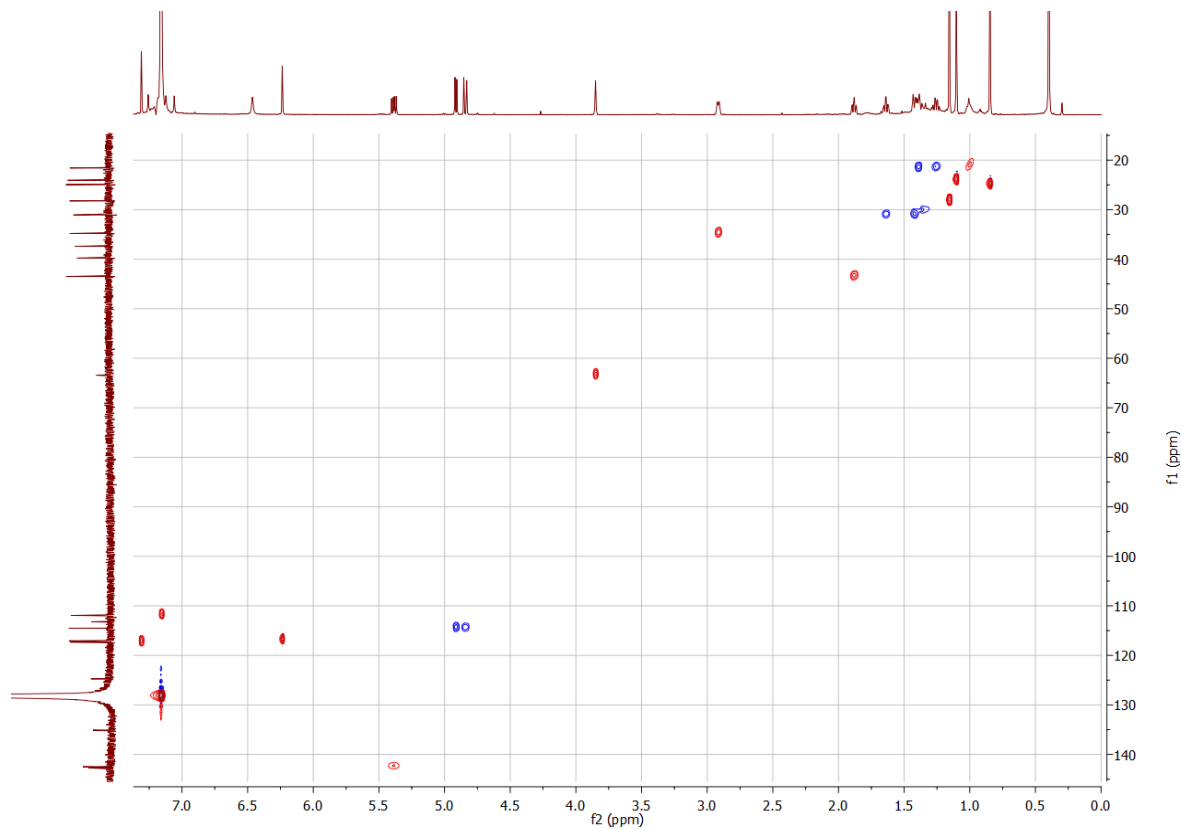

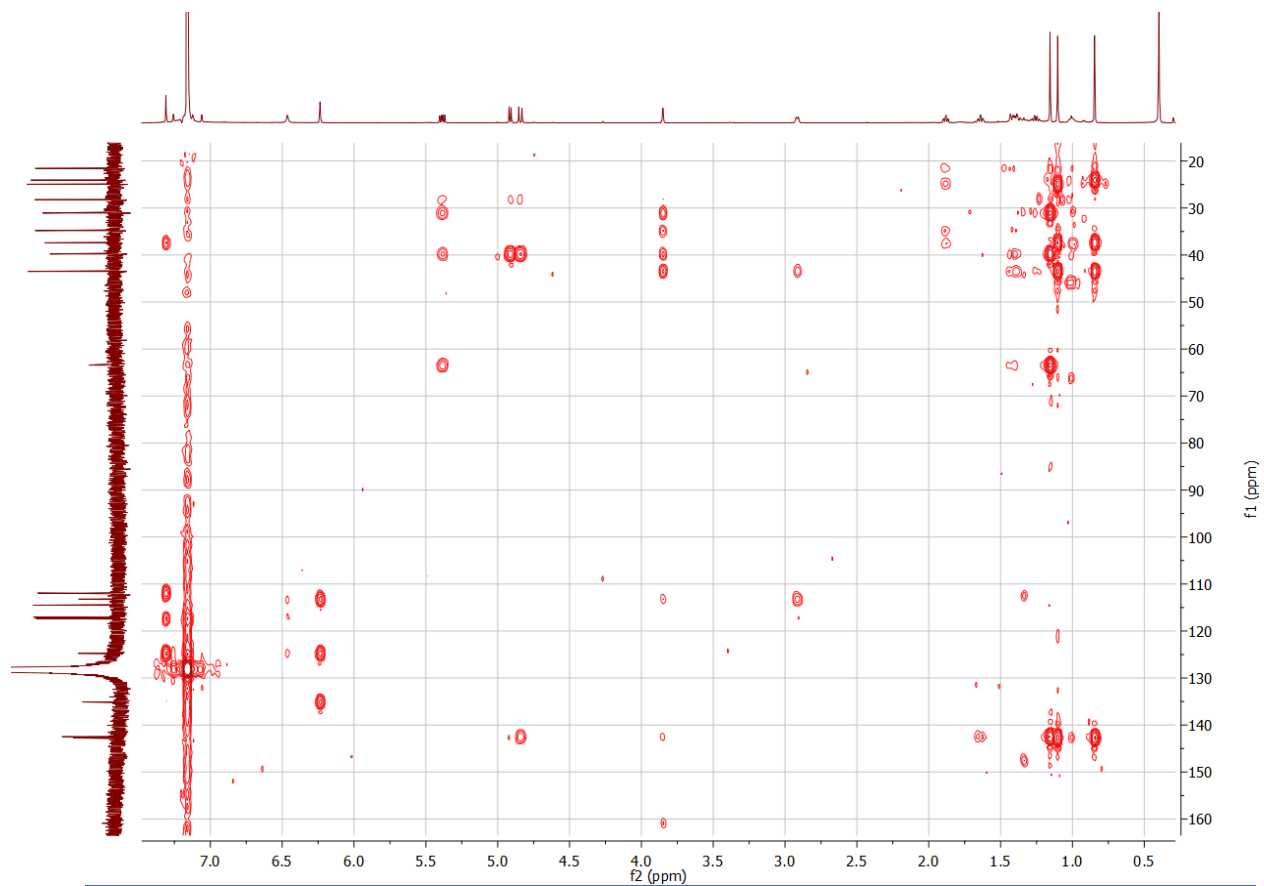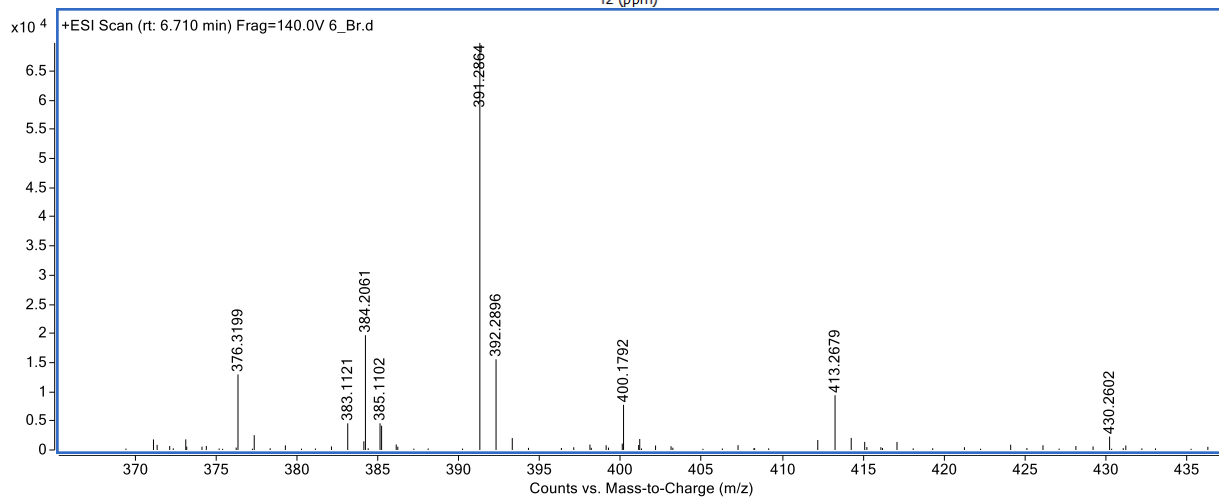

Calc.  $[M+H]^+$  383.1117 Obsv. 383.1121

$^1\text{H}$ ,  $^{13}\text{C}$ , COSY, HSQC, HMBC NMR spectra and HRMS of 5-OMe-12-*epi*-Hapalindole U (**28**) in  $\text{C}_6\text{D}_6$  at 600 MHz and 125 MHz respectively.

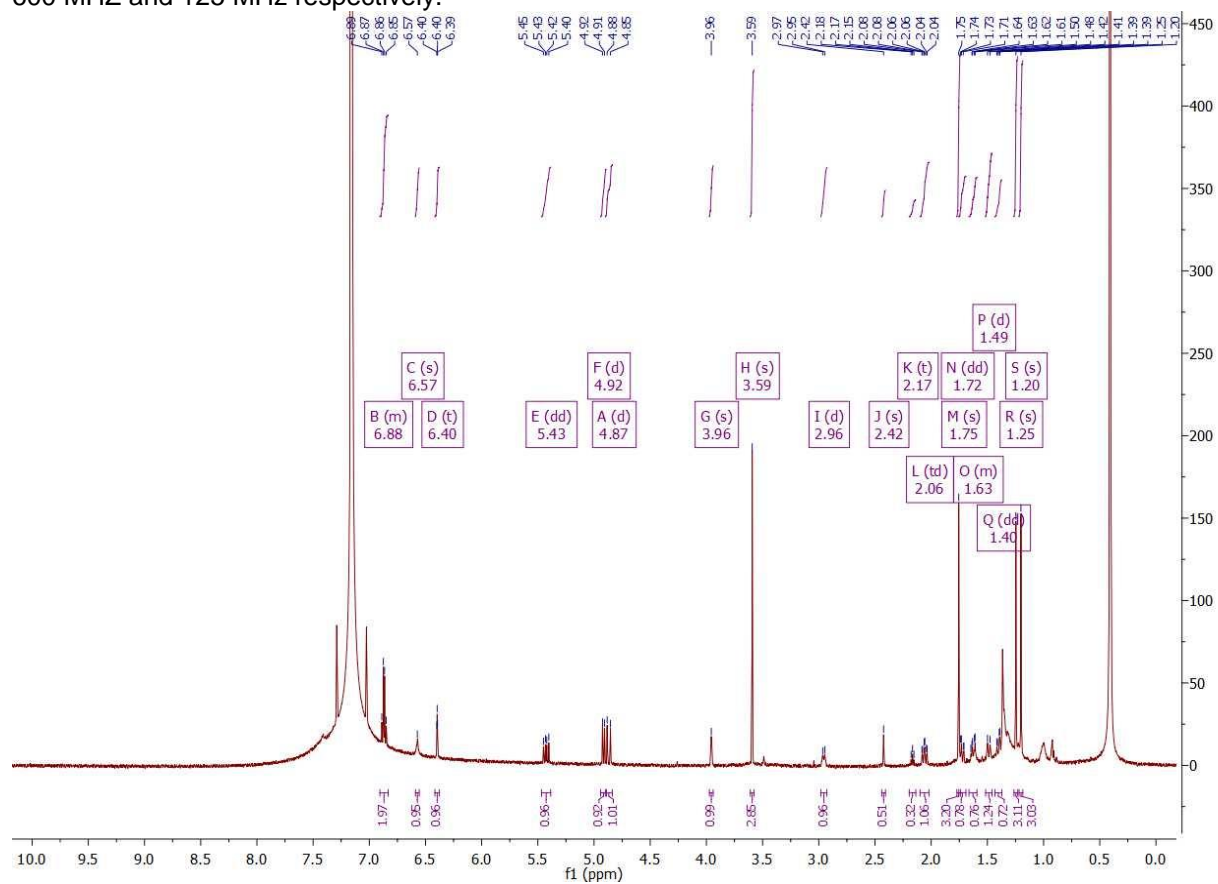



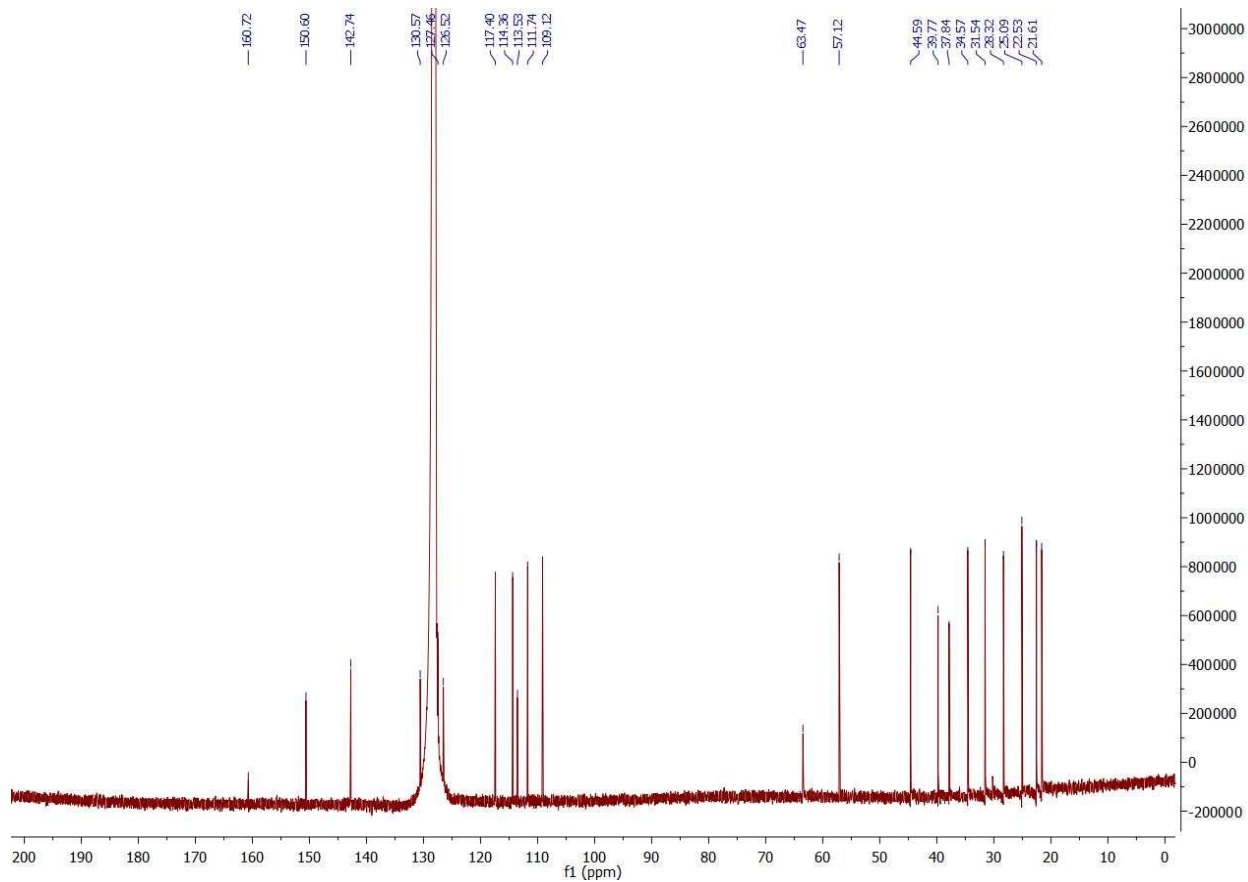

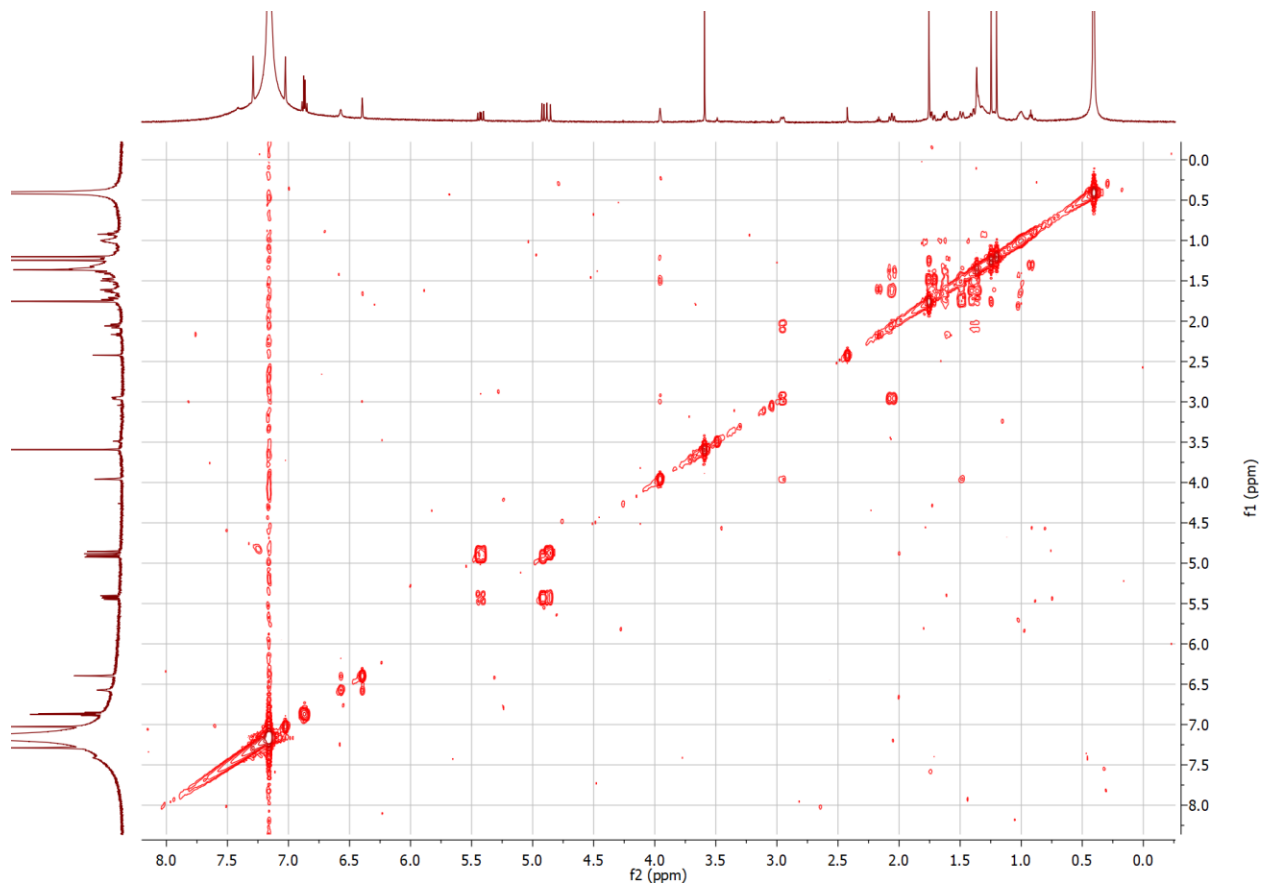

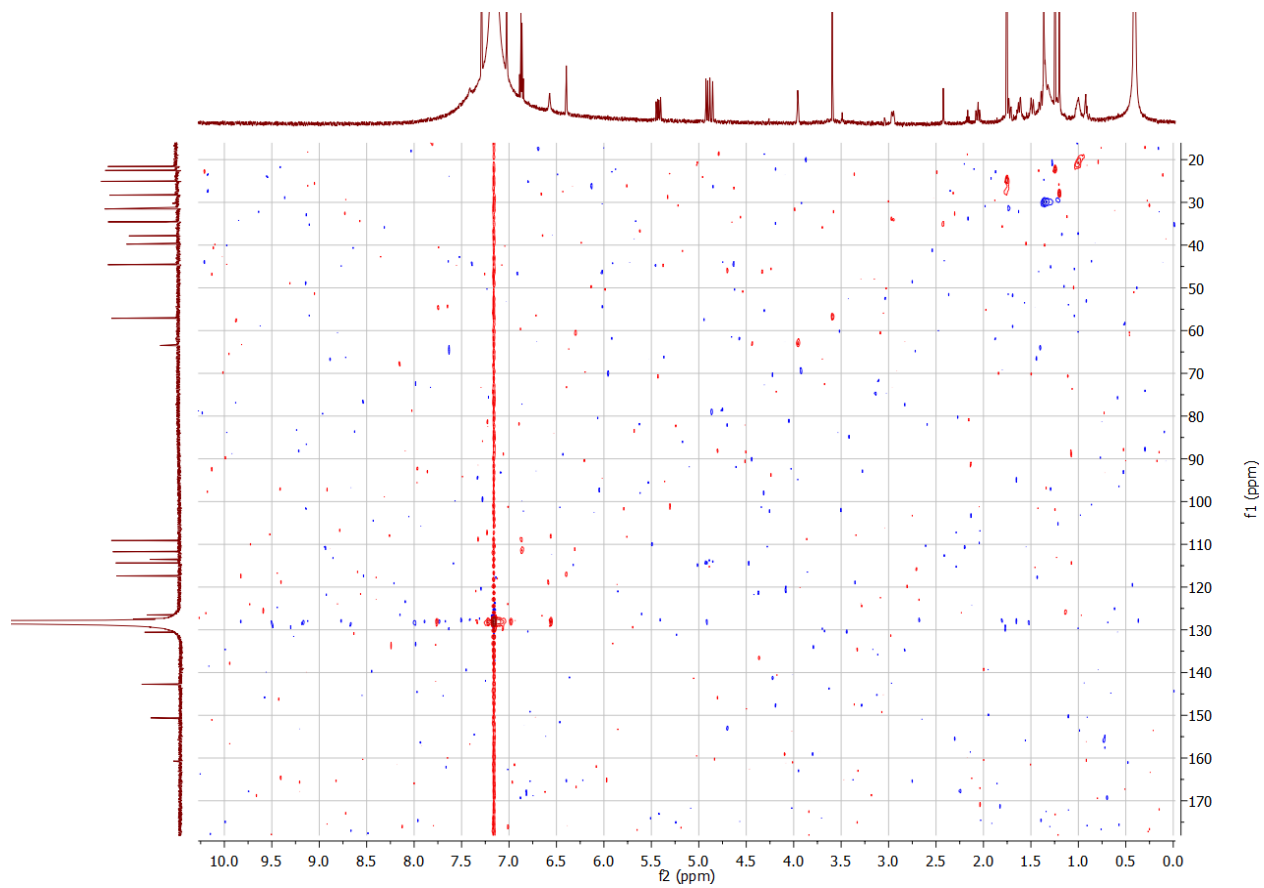

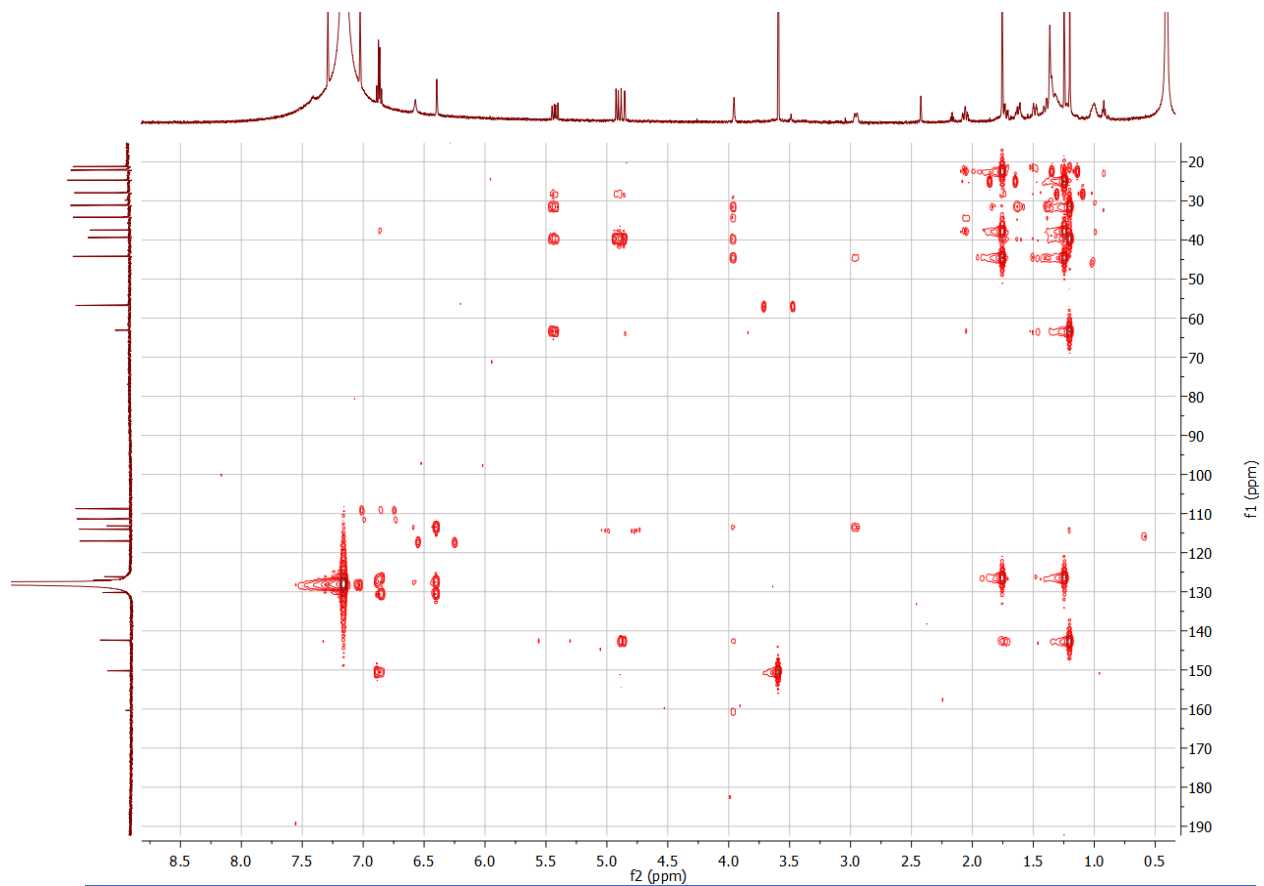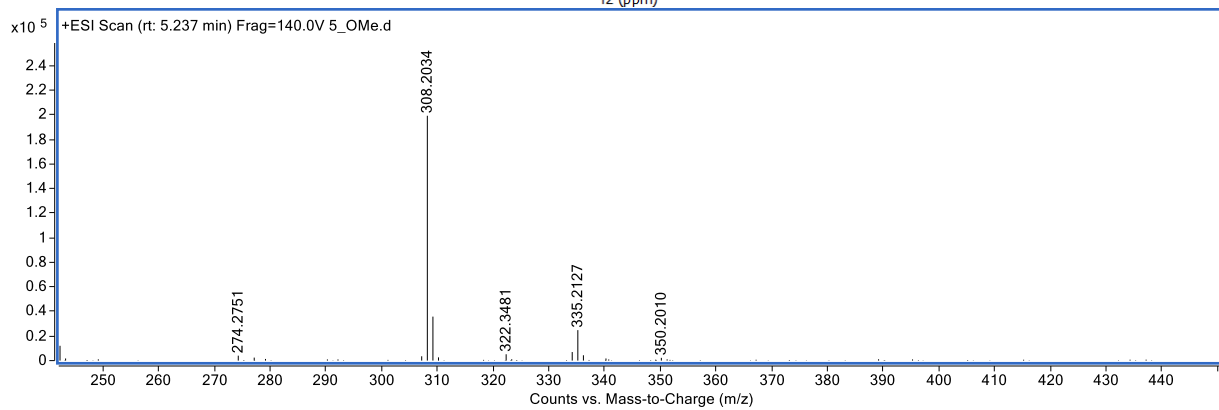

Calc.  $[M+H]^+$  335.2118 Obsv. 335.2127

$^1\text{H}$ ,  $^{13}\text{C}$ , COSY, HSQC, HMBC NMR spectra and HRMS of 5-Cl-12-*epi*-Hapalindole U (**24**) in  $\text{C}_6\text{D}_6$  at 800 MHz and 201 MHz respectively.

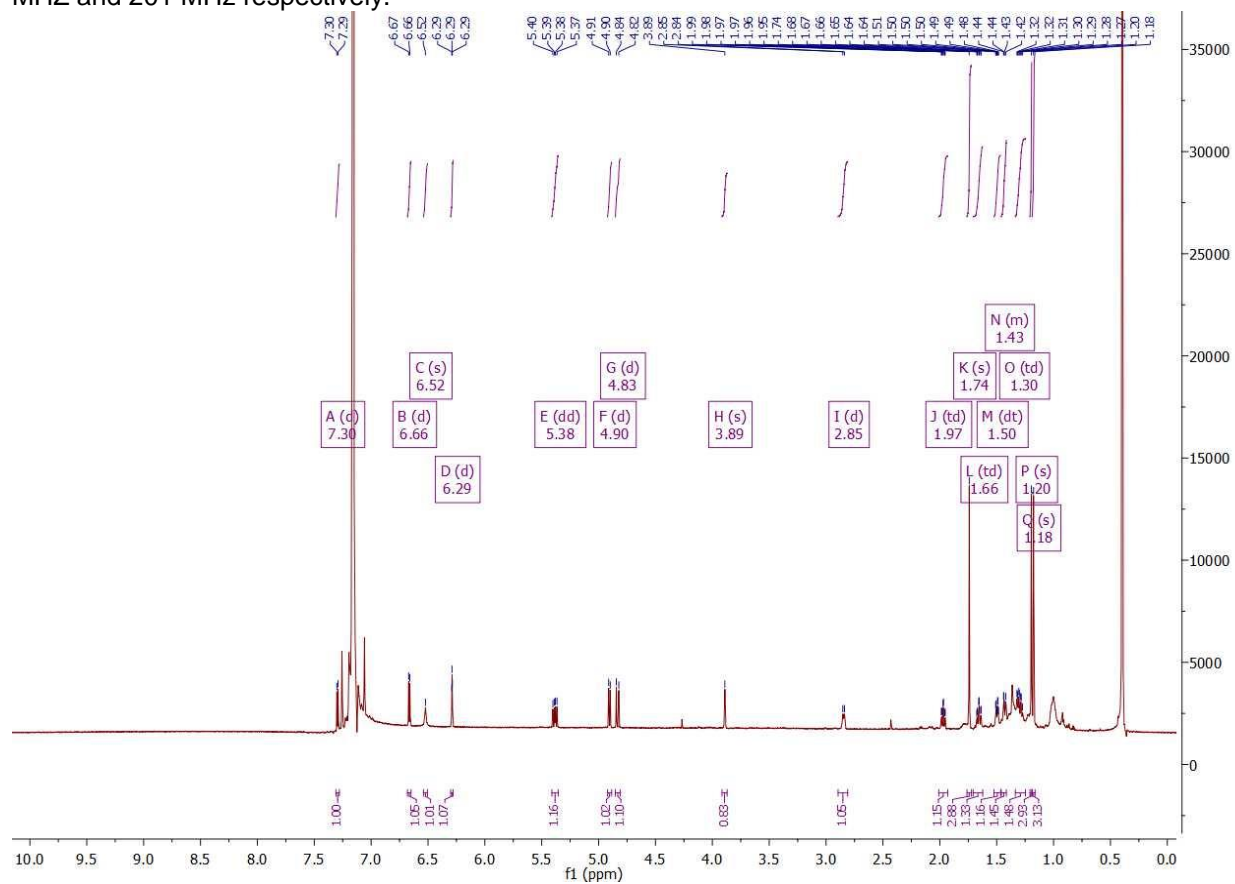

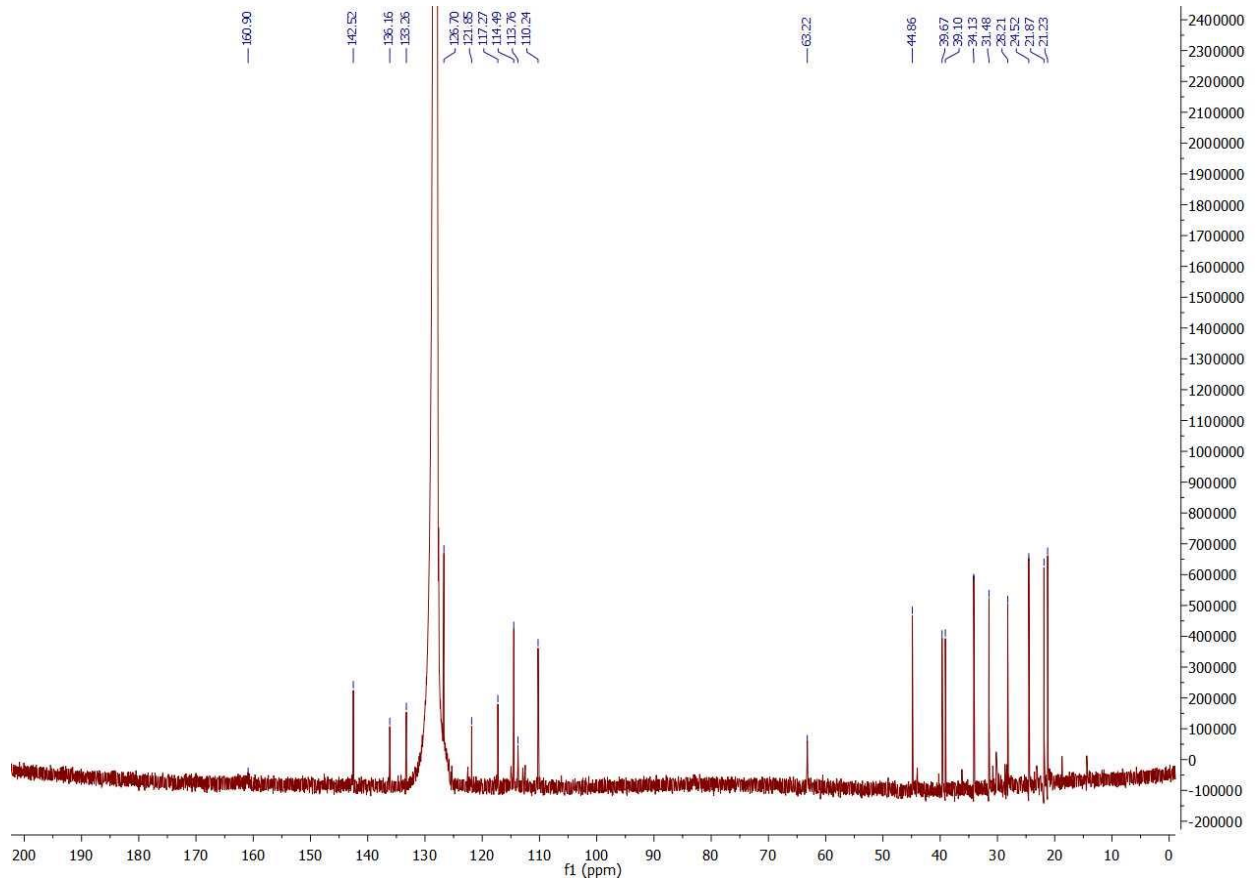



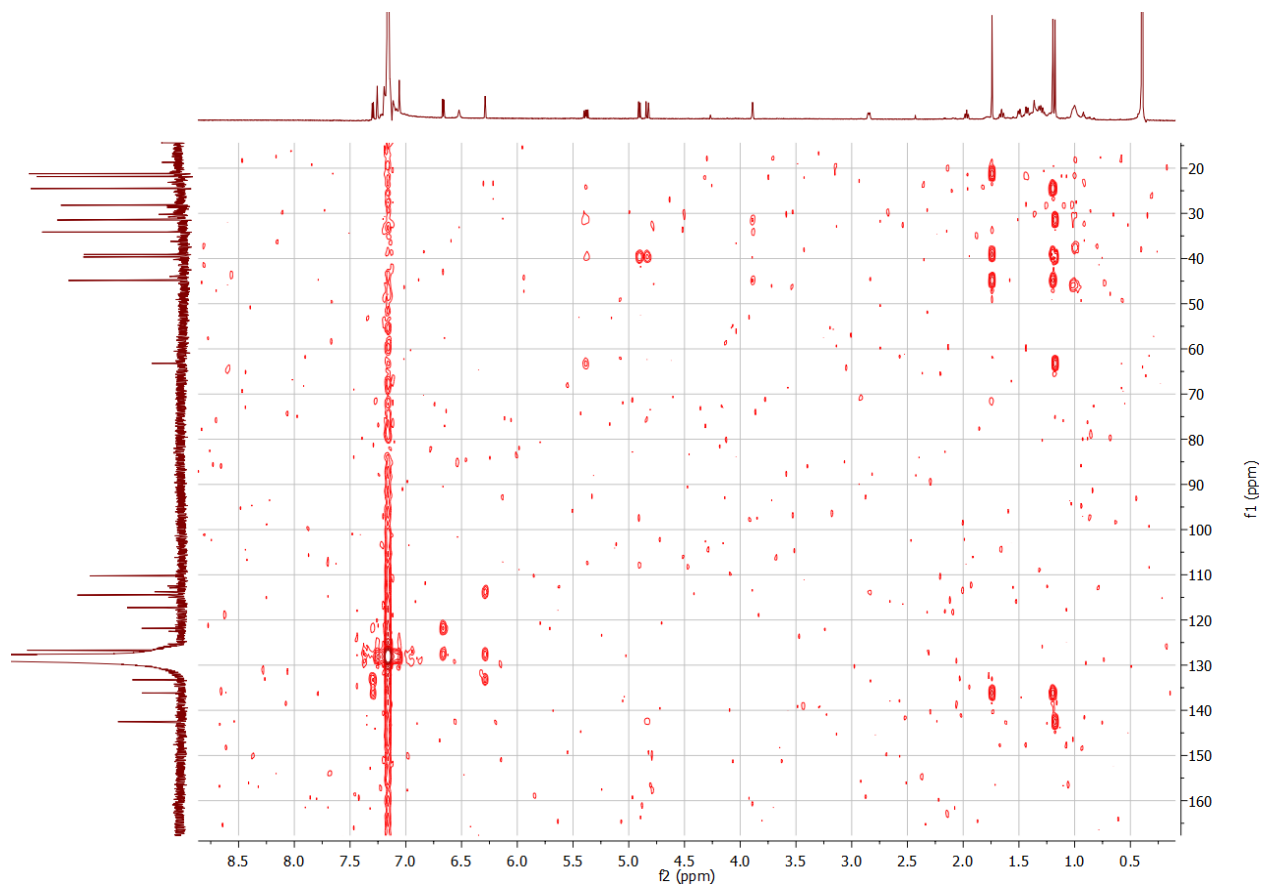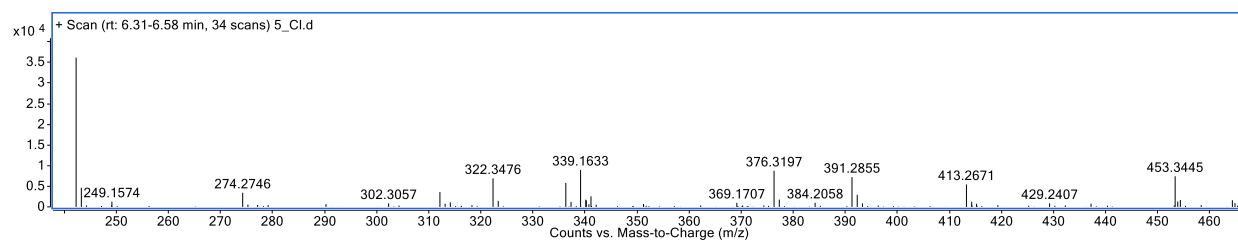

Calc.  $[M+H]^+$  339.1623 Obsv. 339.1633



$^1\text{H}$ ,  $^{13}\text{C}$ , COSY, HSQC, HMBC NMR spectra and HRMS of 6-Cl-12-*epi*-Hapalindole U (**25**) in  $\text{C}_6\text{D}_6$  at 600 MHz and 125 MHz respectively.

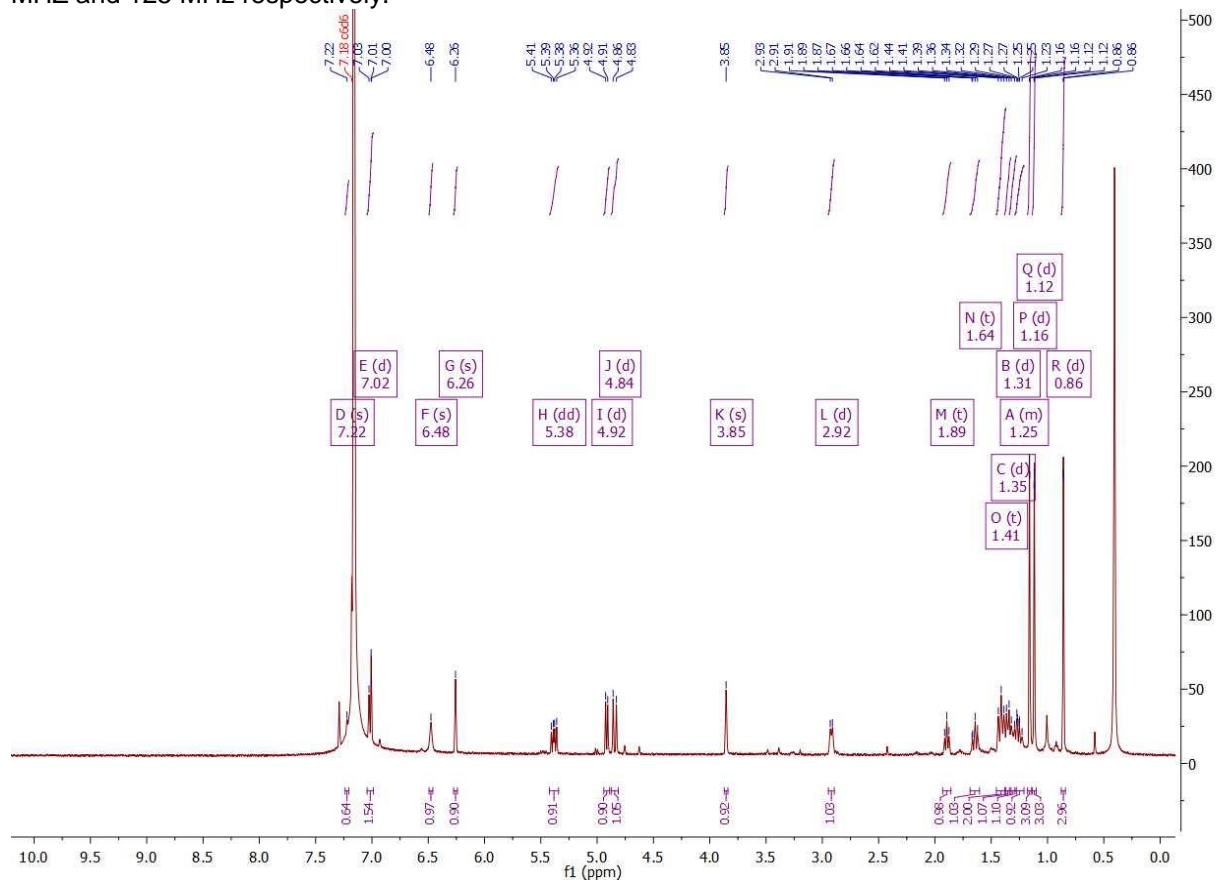

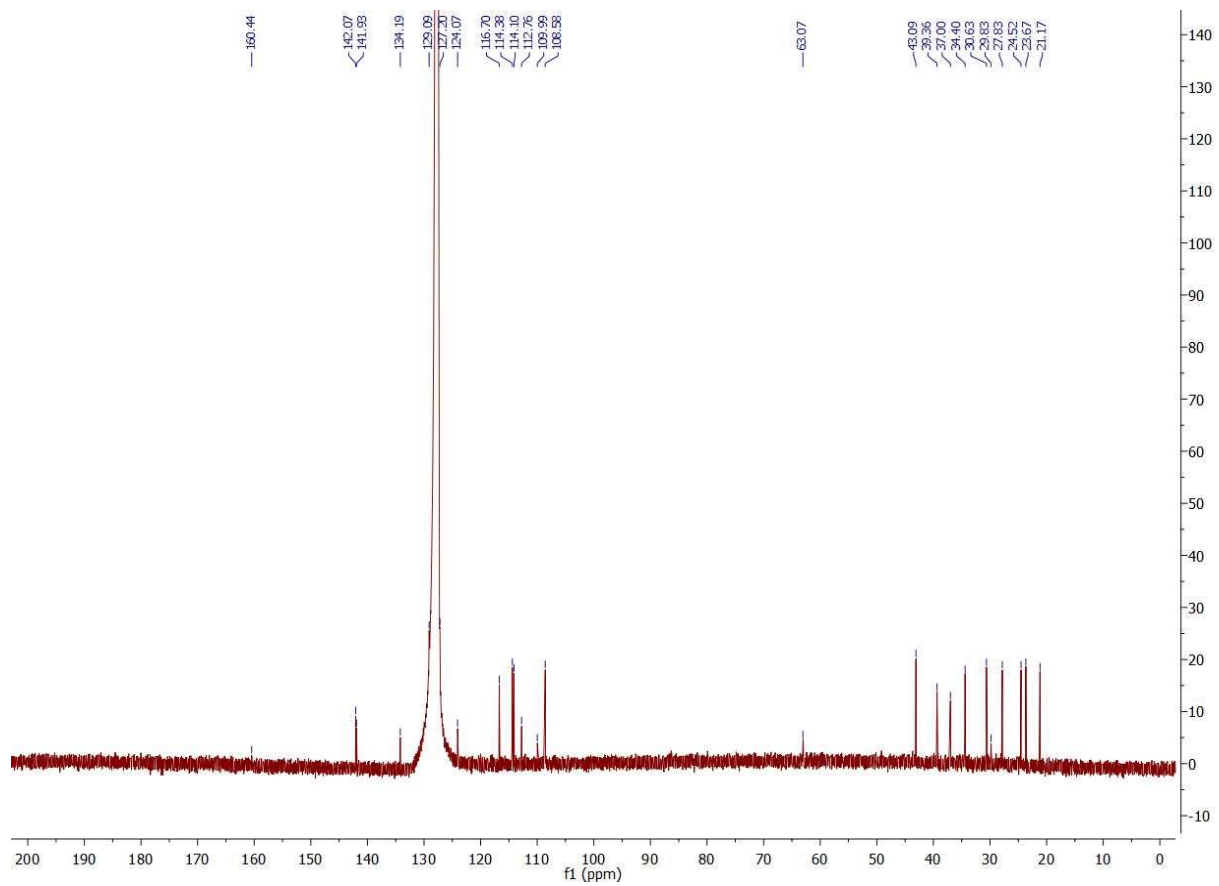

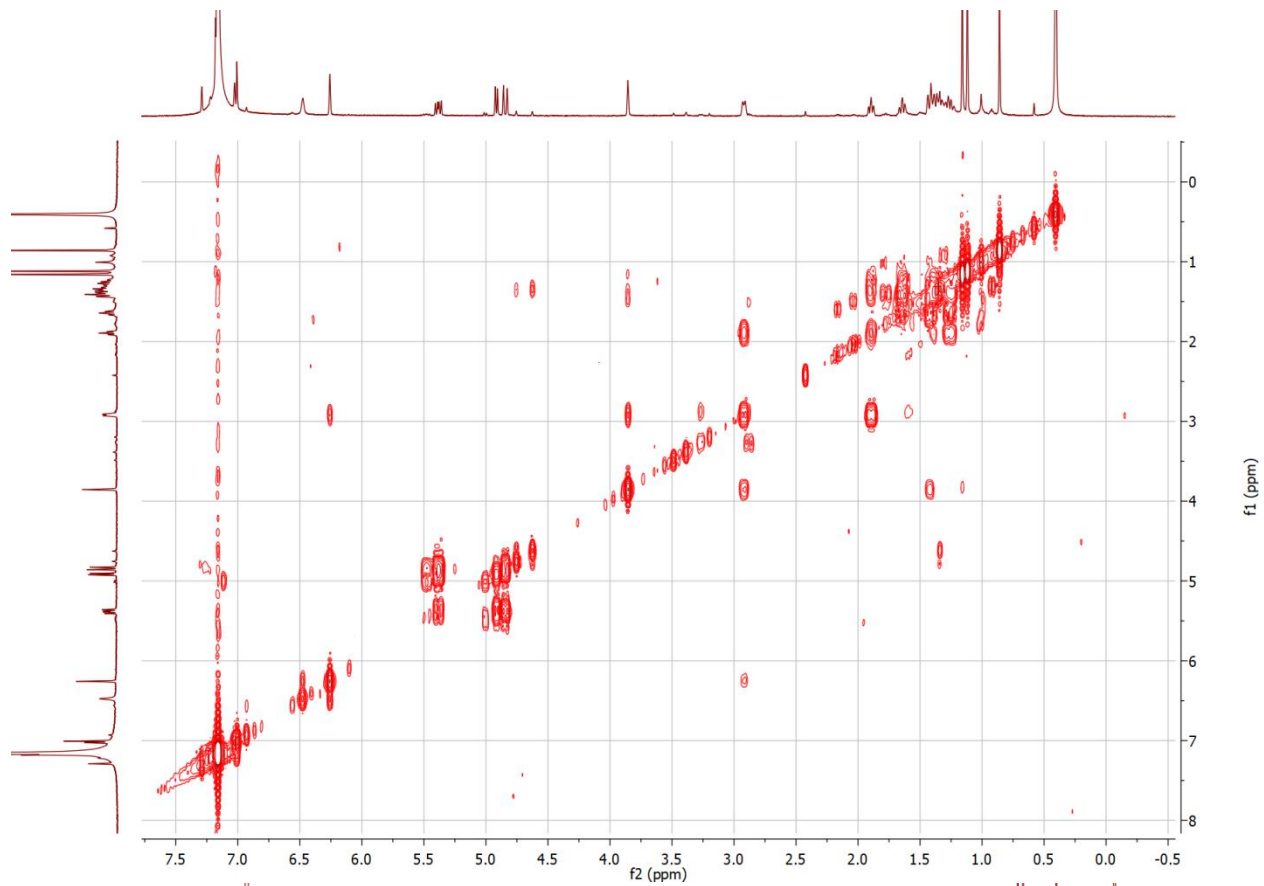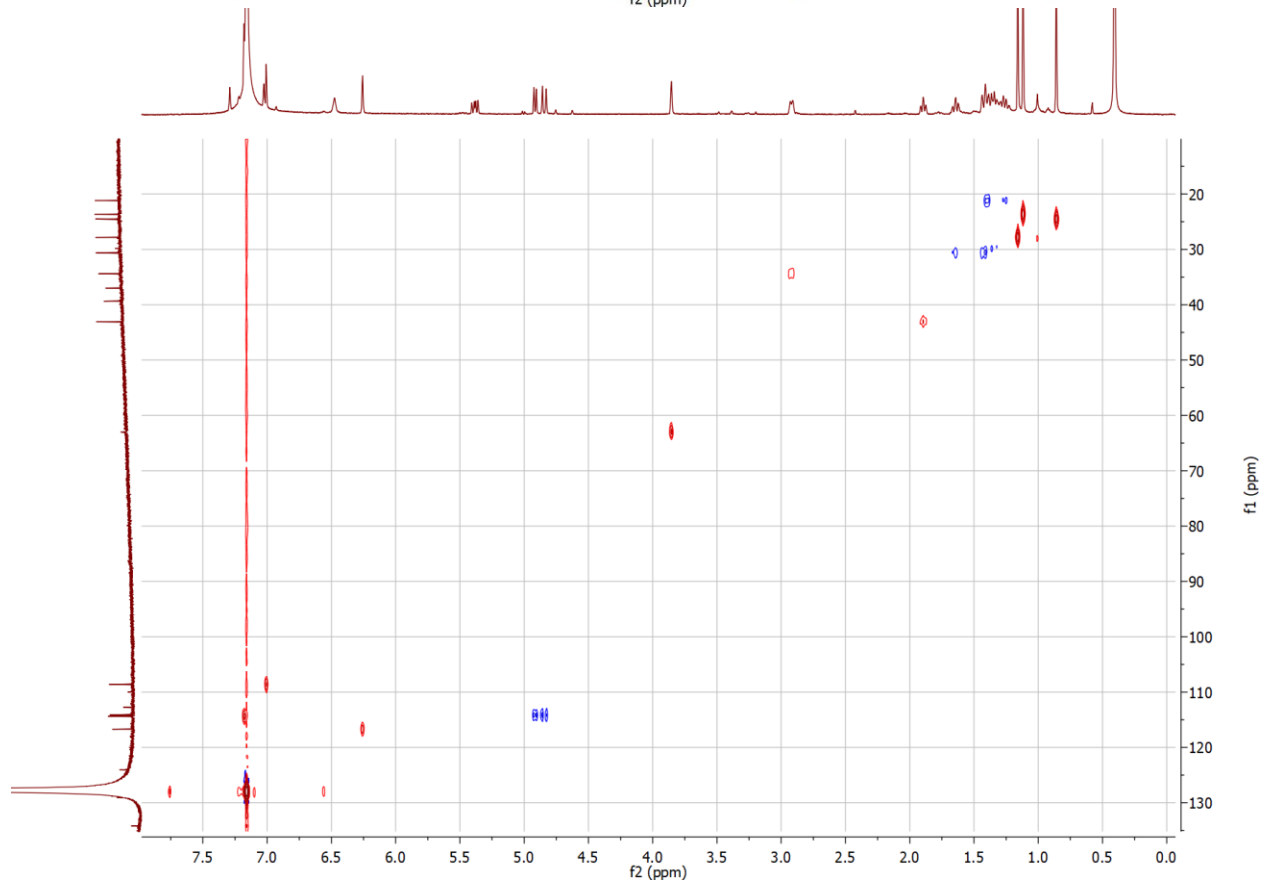

S83

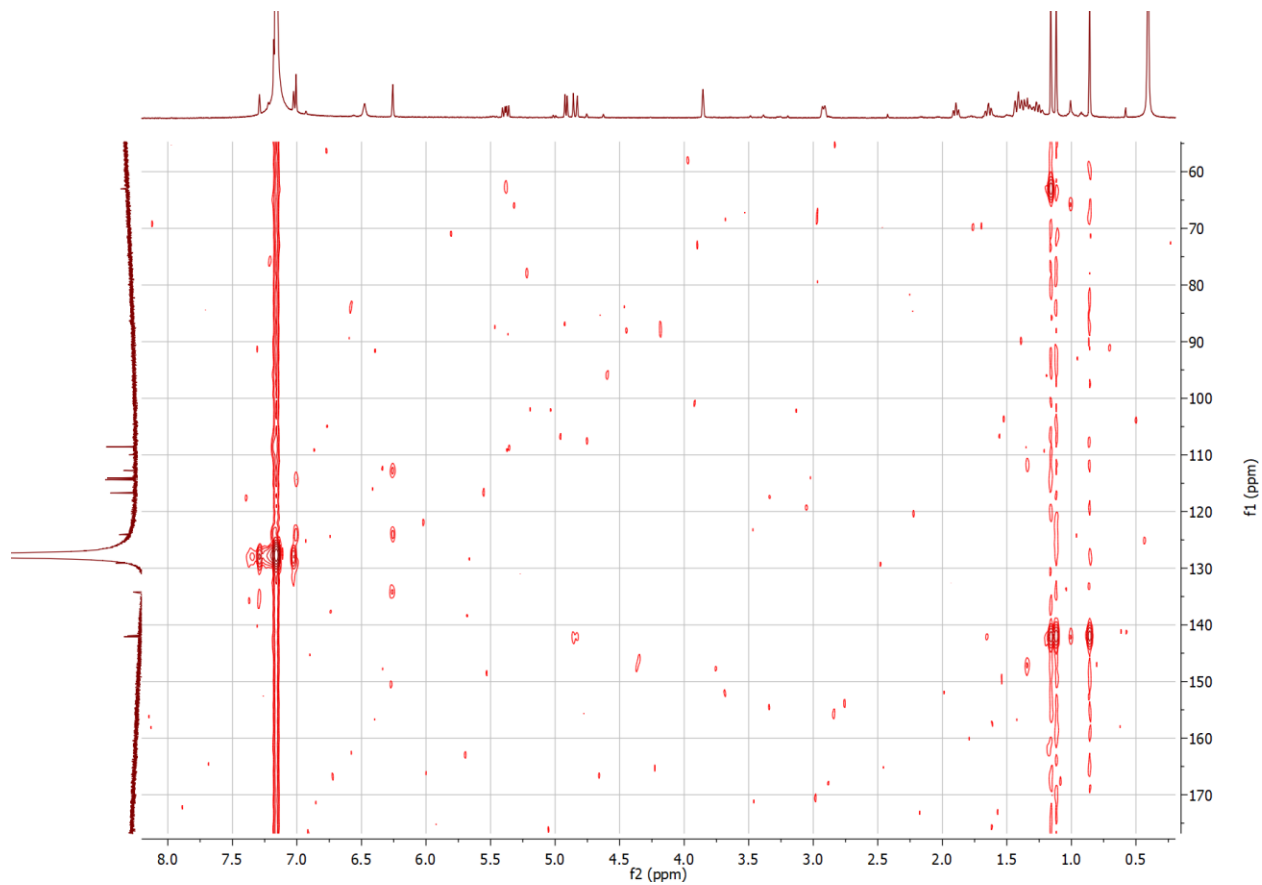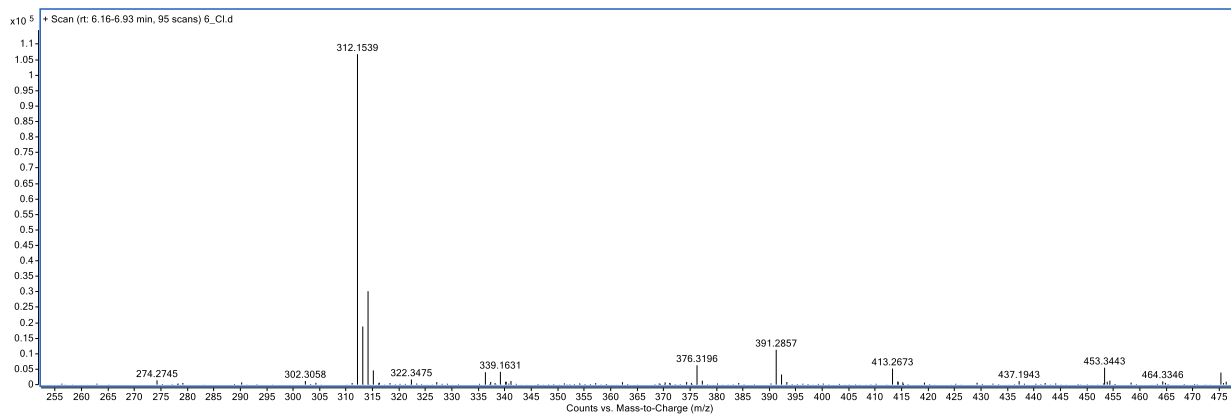

Calc.  $[\text{M}+\text{H}]^+$  339.1623 Obsv. 339.1631

$^1\text{H}$ ,  $^{13}\text{C}$ , COSY, HSQC, HMBC NMR spectra and HRMS of 5-I-12-*epi*-Hapalindole U (with trace 5-I-12-*epi*-Hapalindole C) (**29**) in  $\text{C}_6\text{D}_6$  at 600 MHz and 125 MHz respectively.

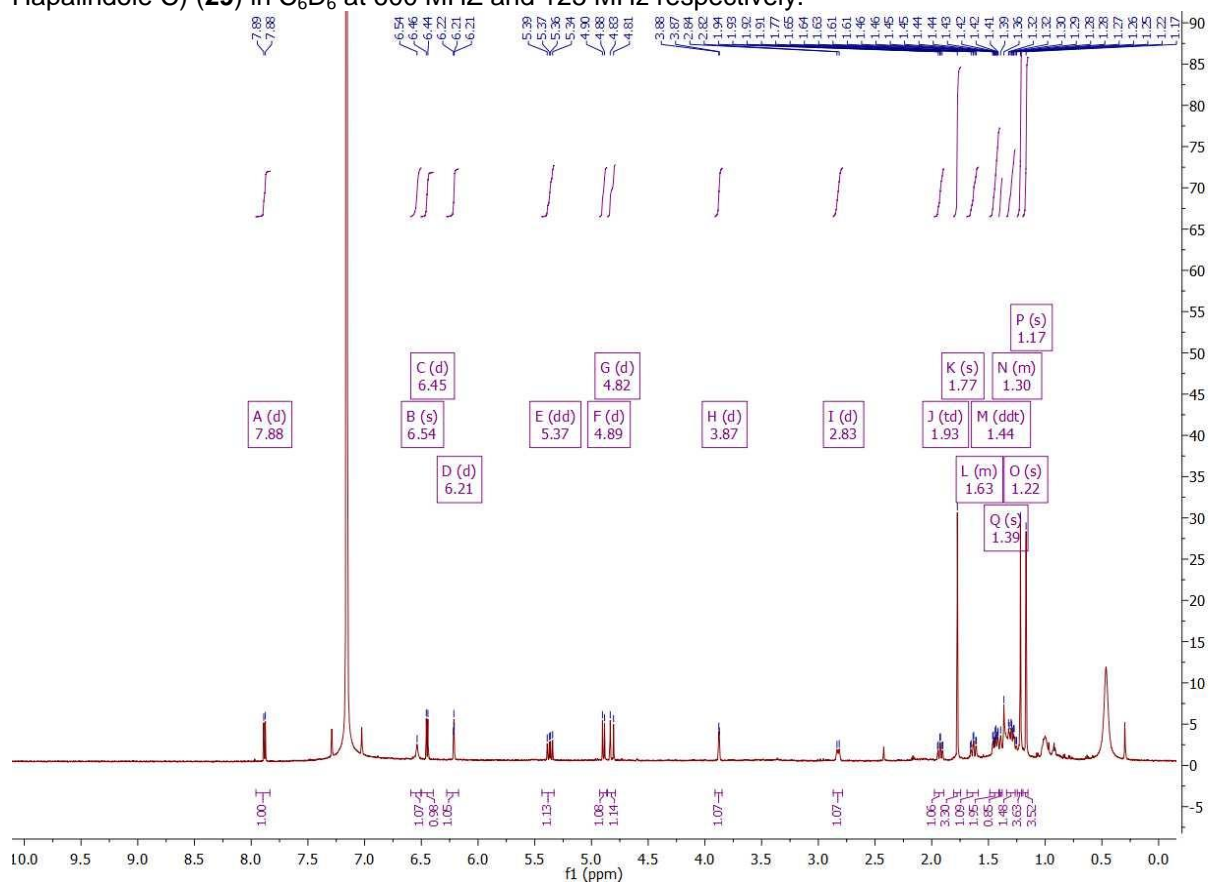

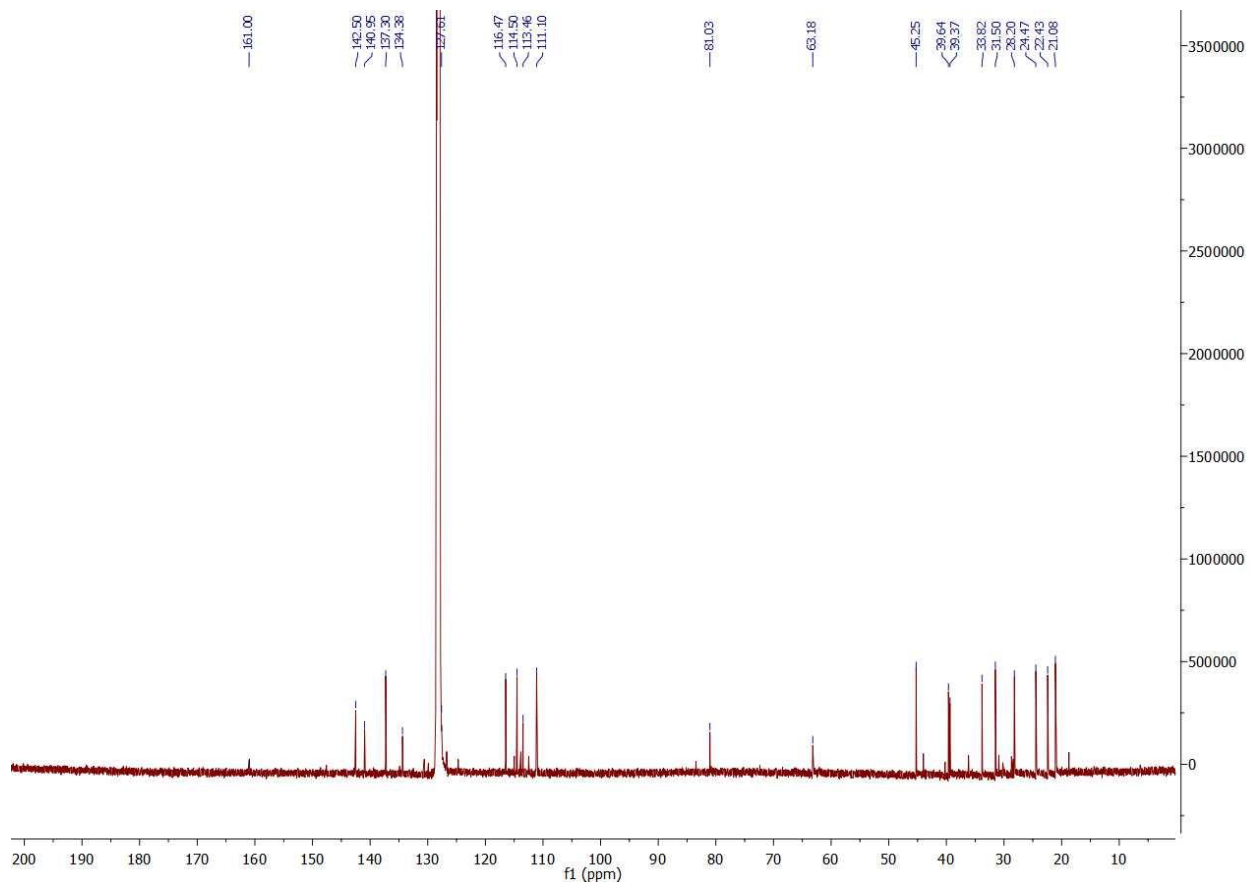

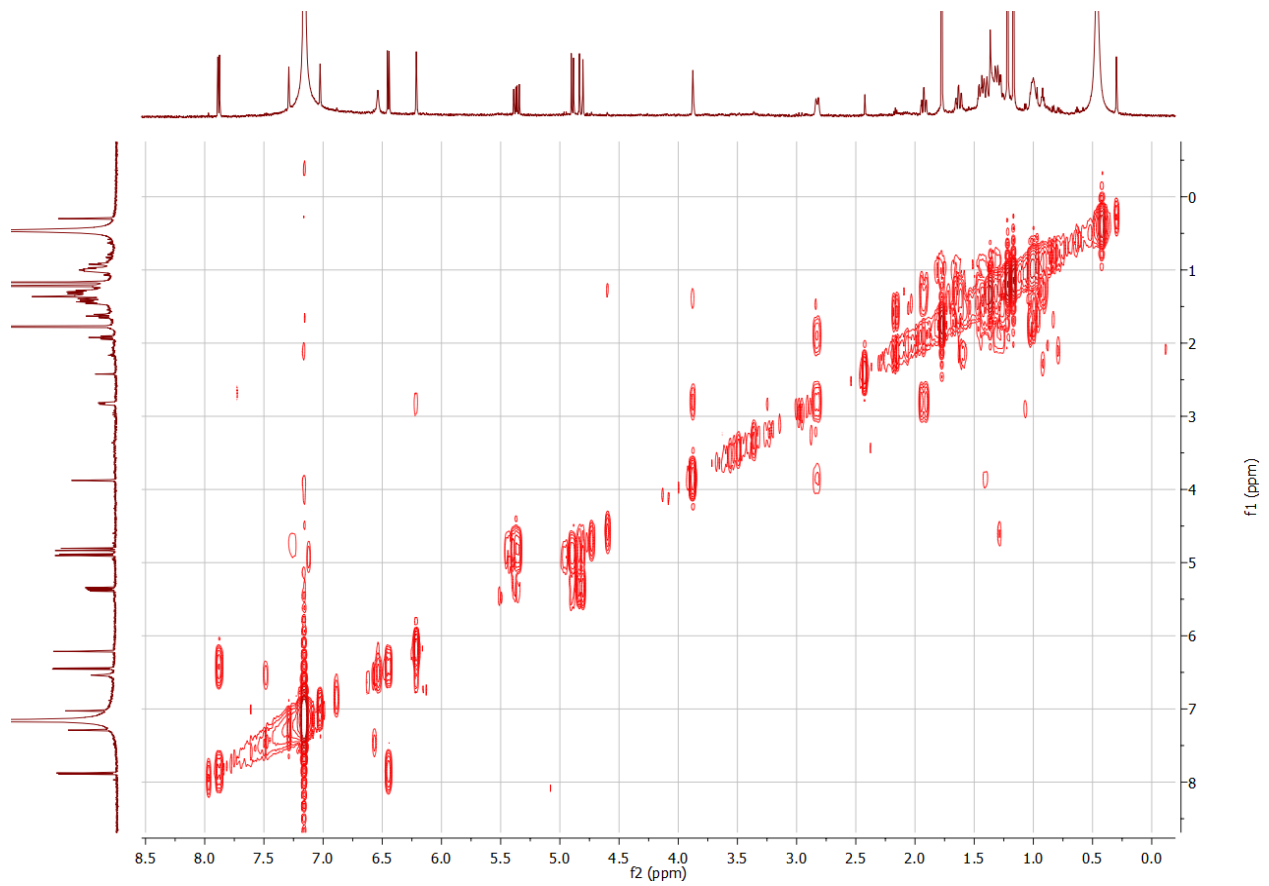

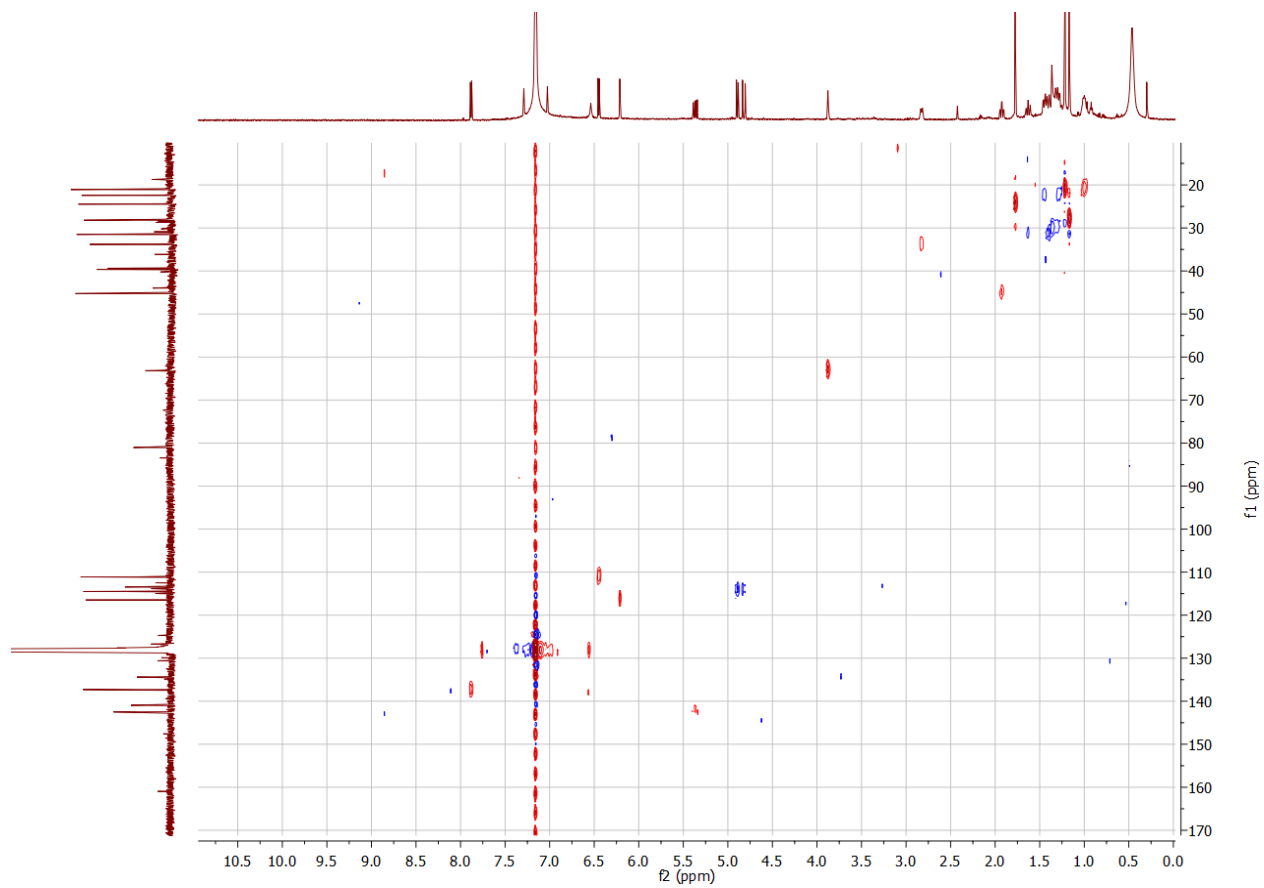



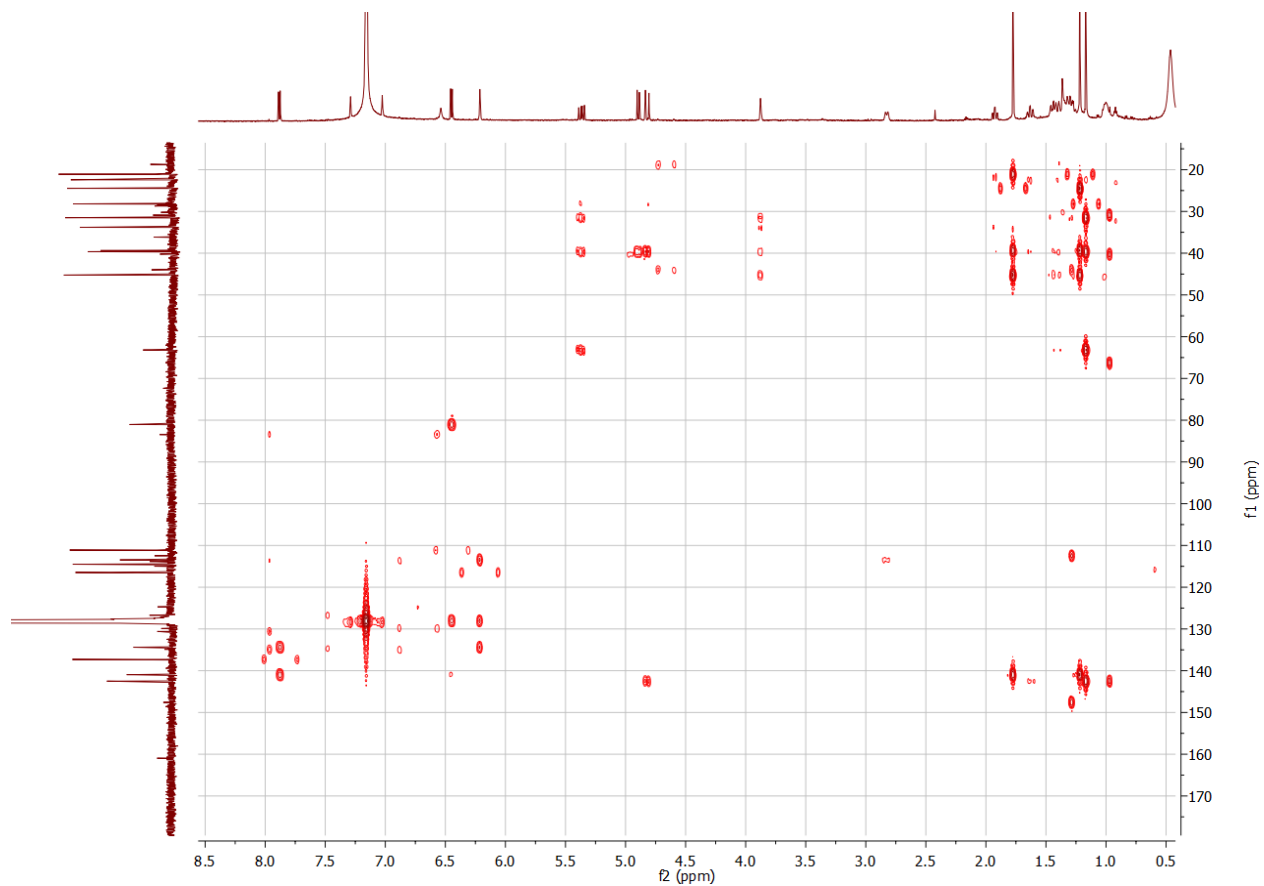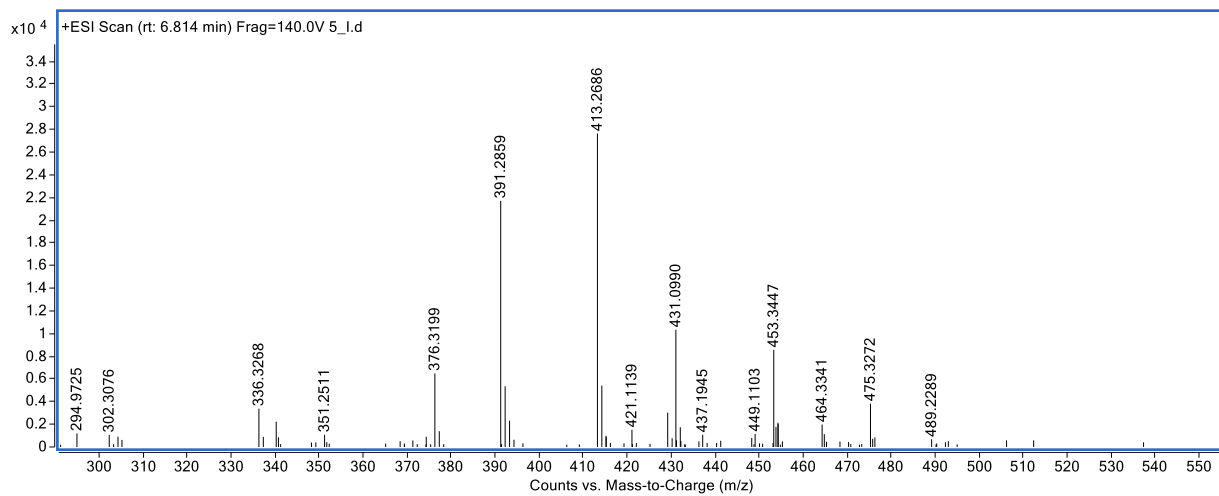

Calc. [M+H]<sup>+</sup> 431.0979 Obsv. 431.0990

$^1\text{H}$ ,  $^{13}\text{C}$ , COSY, HSQC, HMBC NMR spectra and HRMS of 12-*epi*-hapalindole nitrile (**30**) (w/trace 12-*epi*-hapalindole C nitrile) in  $\text{C}_6\text{D}_6$  at 800 MHz and 201 MHz respectively.

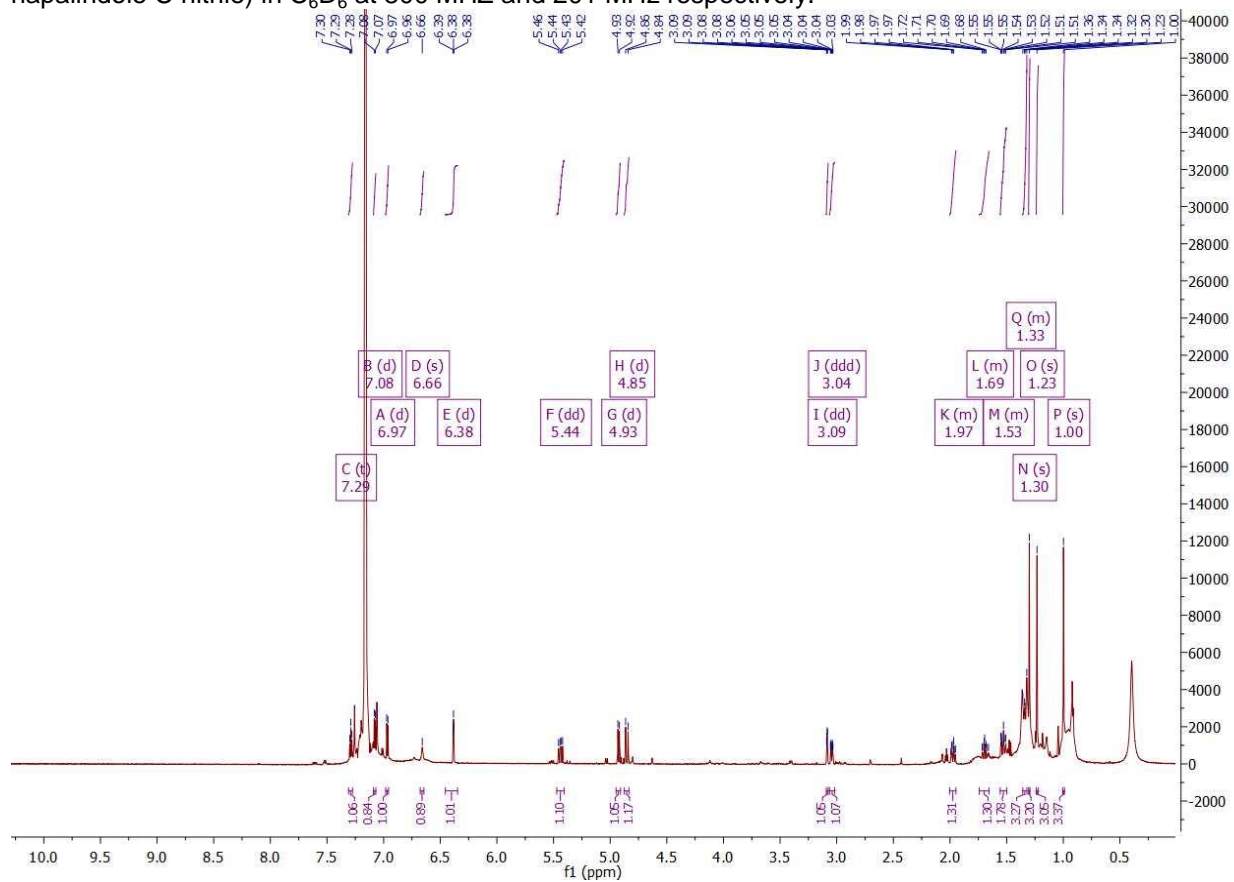

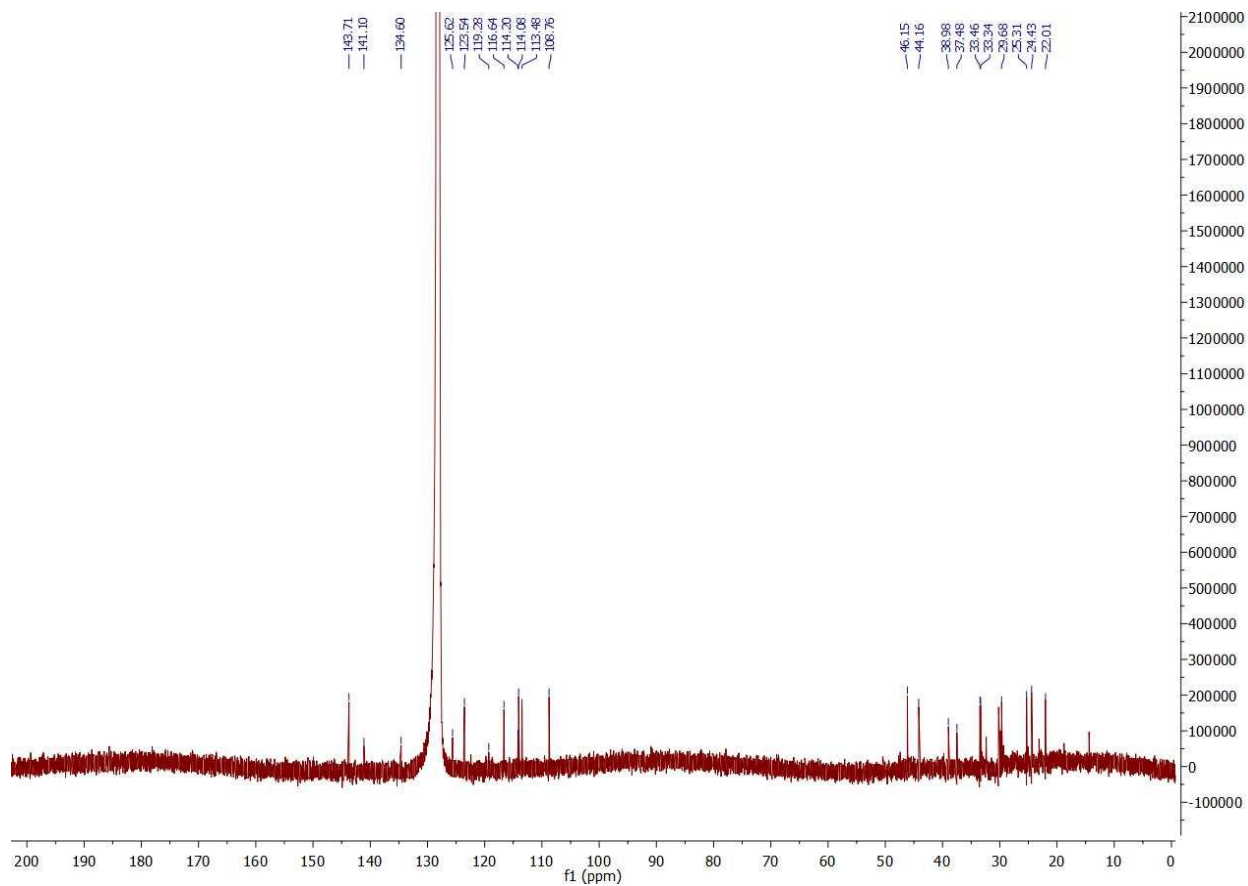

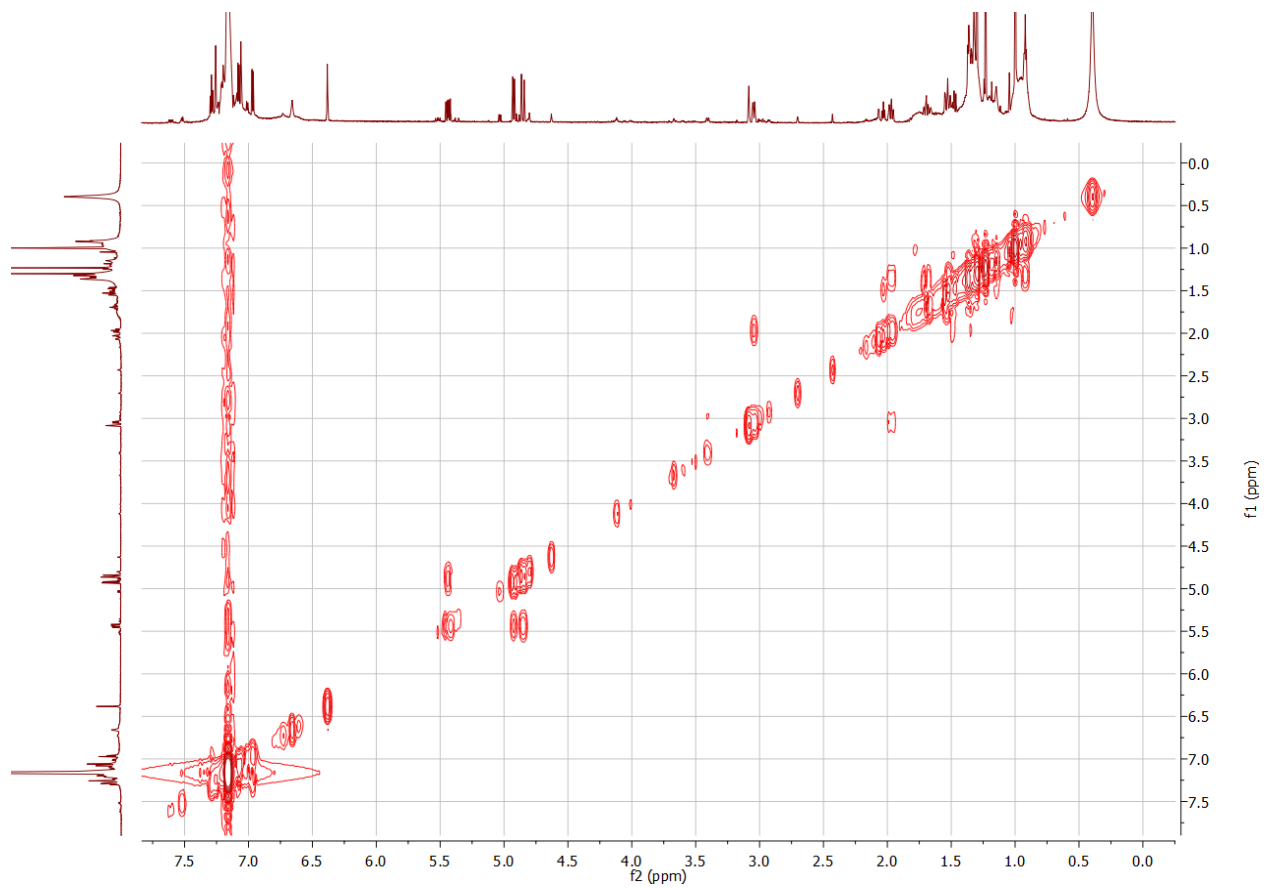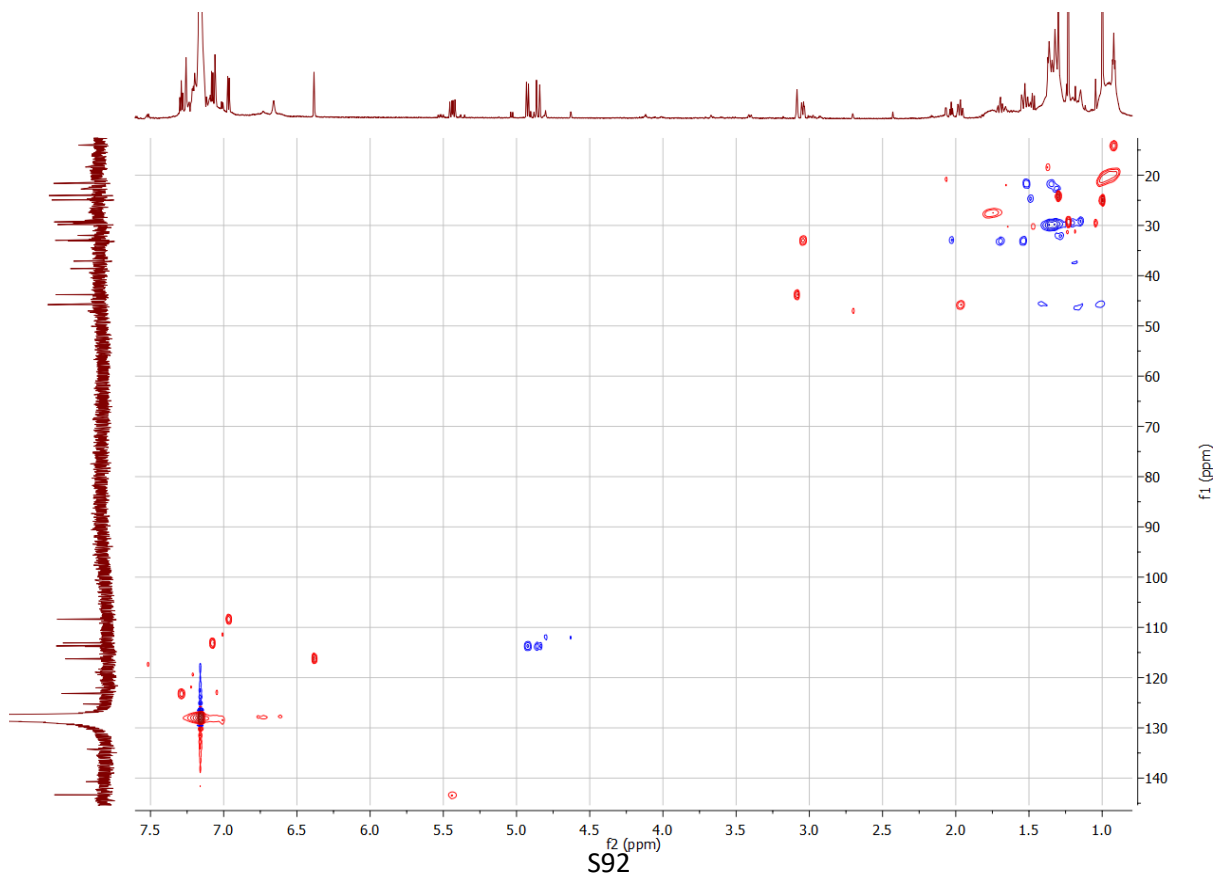

S92

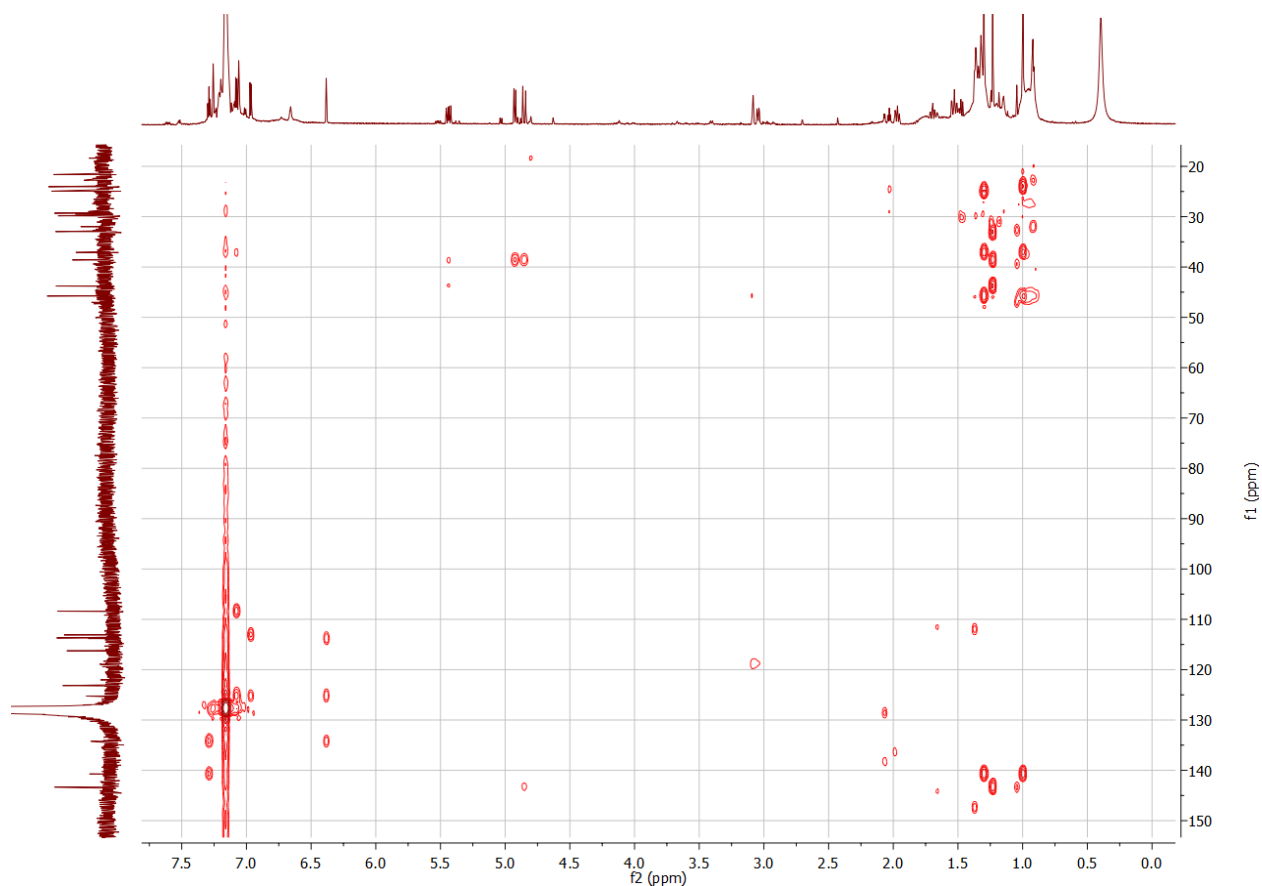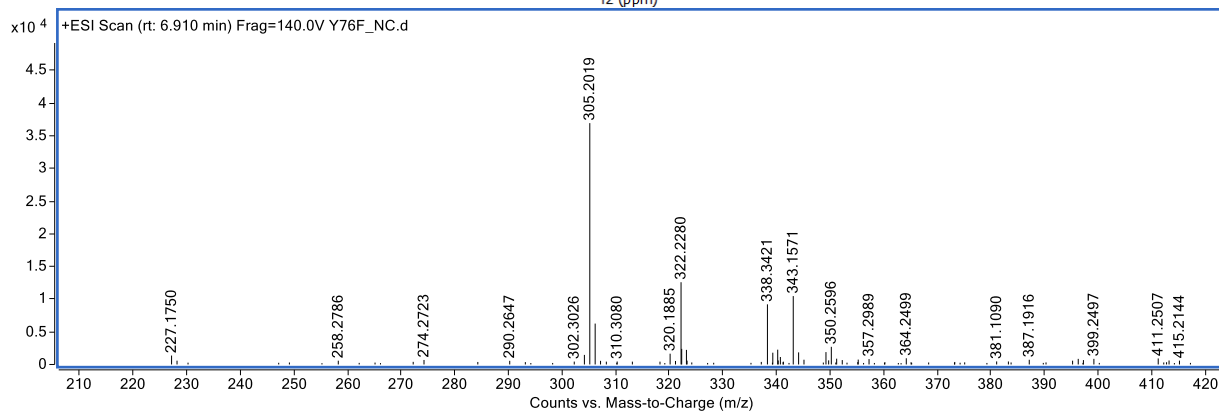

Calc.  $[M+H]^+$  305.2012 Obsv. 305.2019

$^1\text{H}$  and  $^{13}\text{C}$  spectra and HRMS of 5-F-12-*epi*-Fischerindole U (**33**)  
Full characterization data<sup>1</sup>

$^1\text{H}$  and  $^{13}\text{C}$  NMR spectra and HRMS of 6-F-12-*epi*-Fischerindole U (**37**)  
Full characterization data<sup>1</sup>

$^1\text{H}$ ,  $^{13}\text{C}$ , COSY, HSQC, HMBC NMR spectra and HRMS of 5-Cl-12-*epi*-Fischerindole U (**34**) in  $\text{C}_6\text{D}_6$  at 800 MHz and 201 MHz respectively.

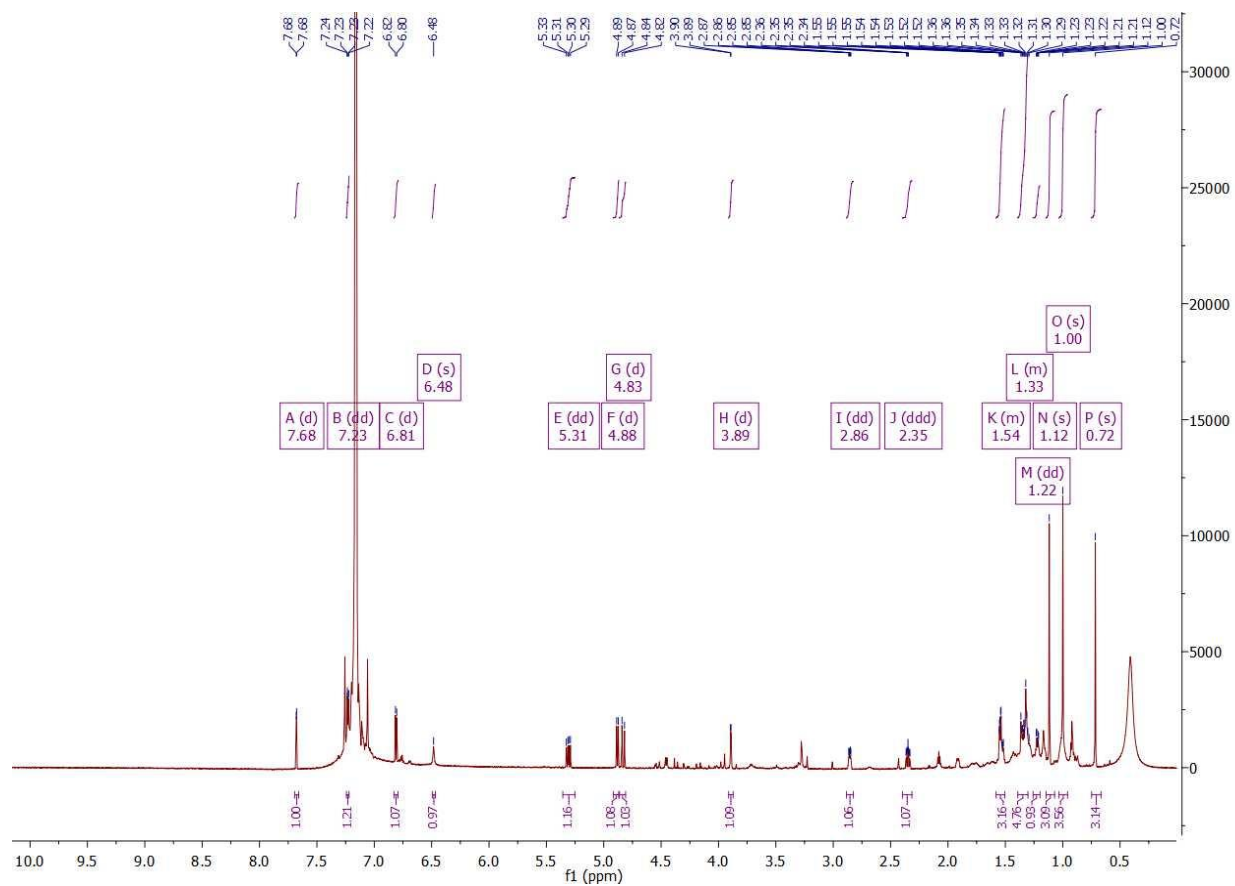

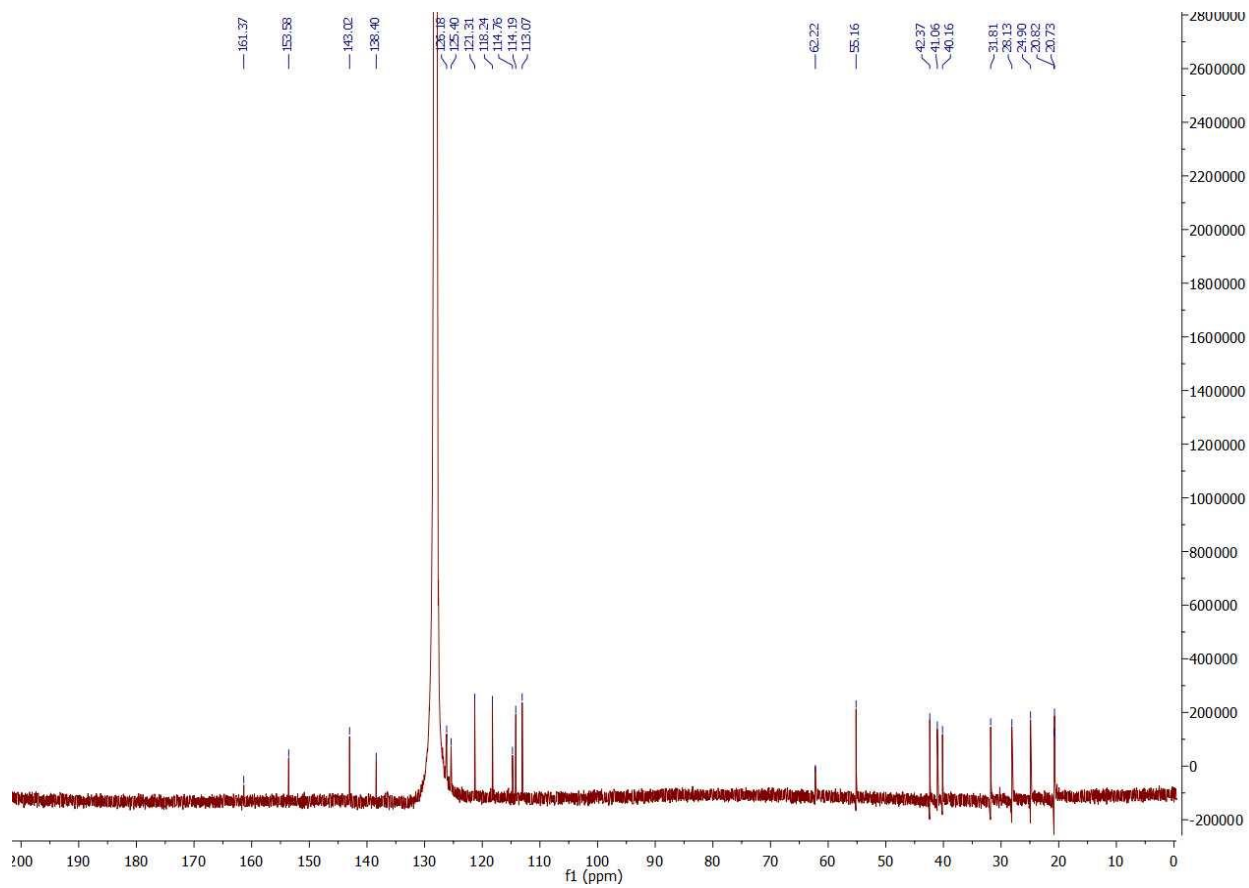

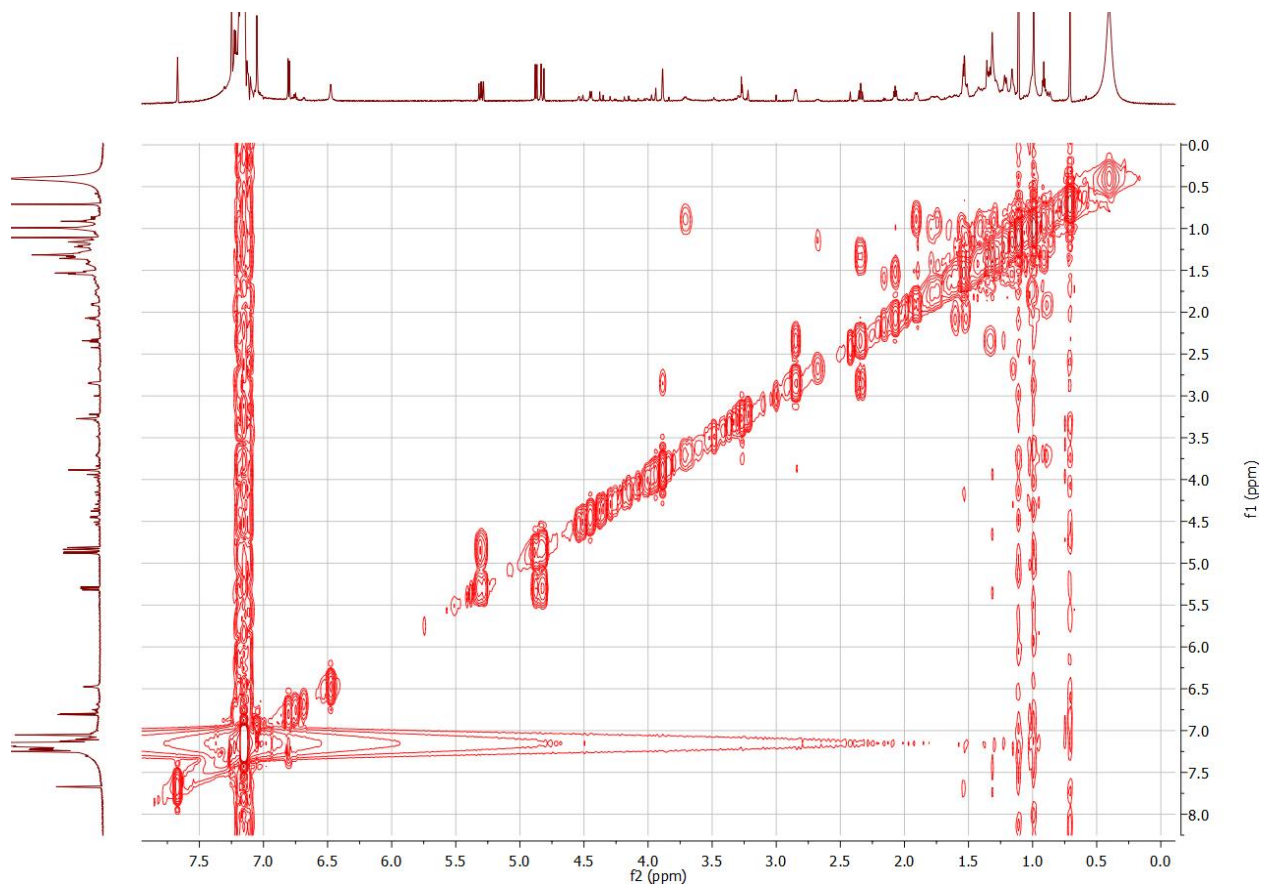



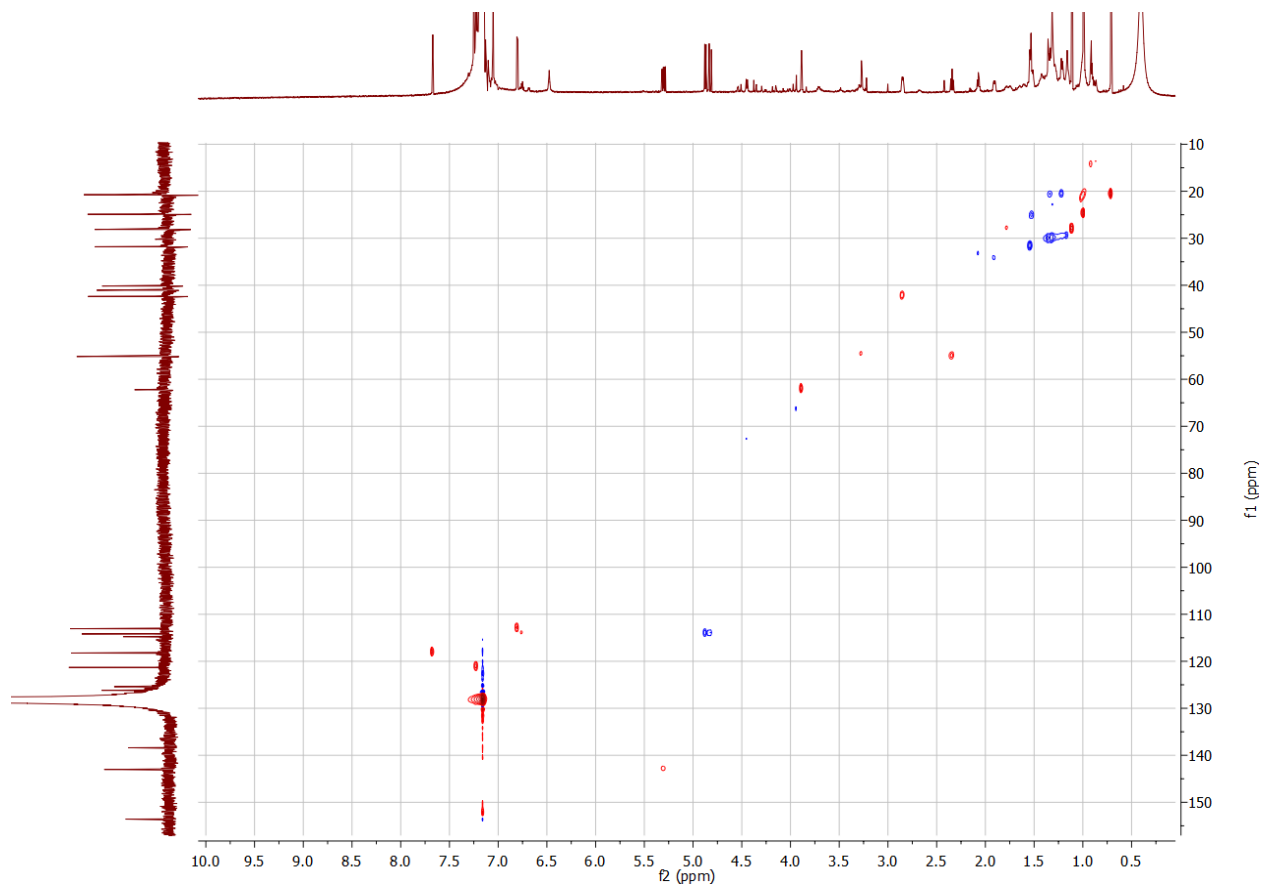

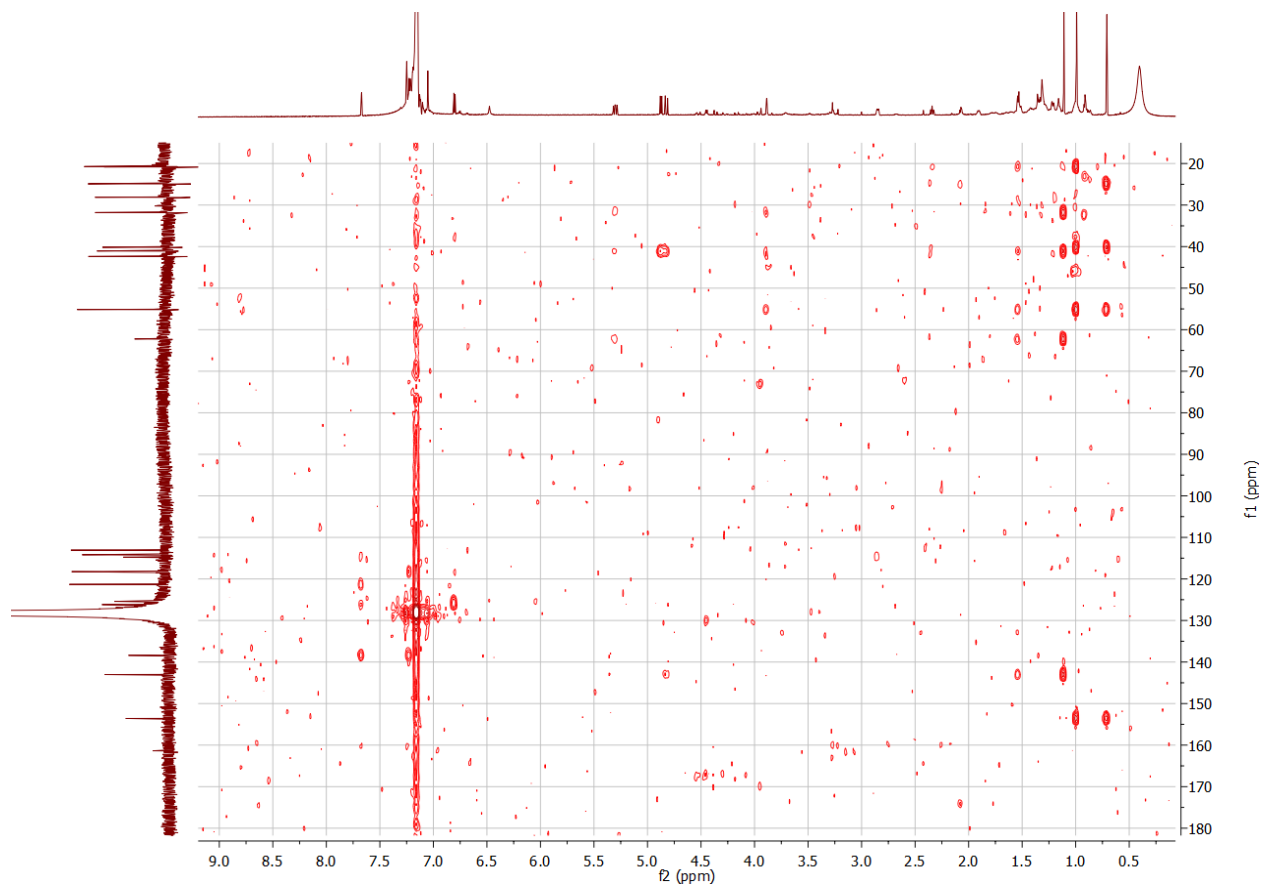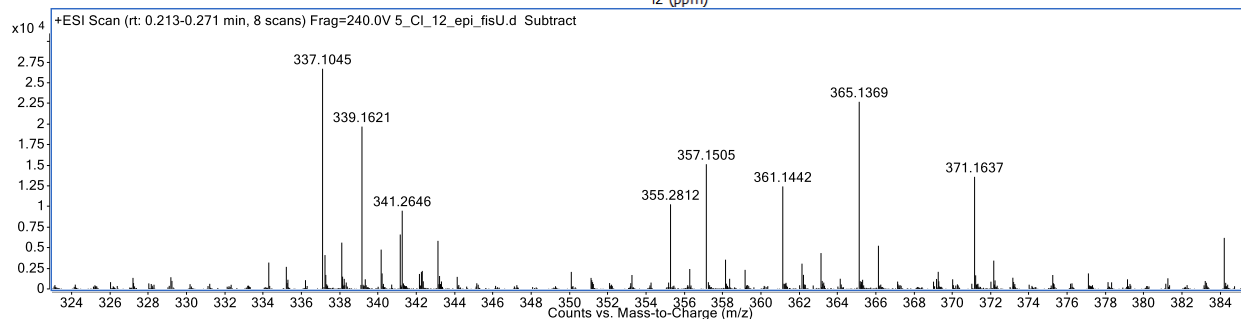

Calc.  $[M+H]^+$  339.1623 Obsv. 339.1621

$^1\text{H}$ ,  $^{13}\text{C}$ , COSY, HSQC, HMBC NMR spectra and HRMS of 6-Cl-12-*epi*-Fischerindole U (**38**) in  $\text{C}_6\text{D}_6$  at 600 MHz and 125 MHz respectively.

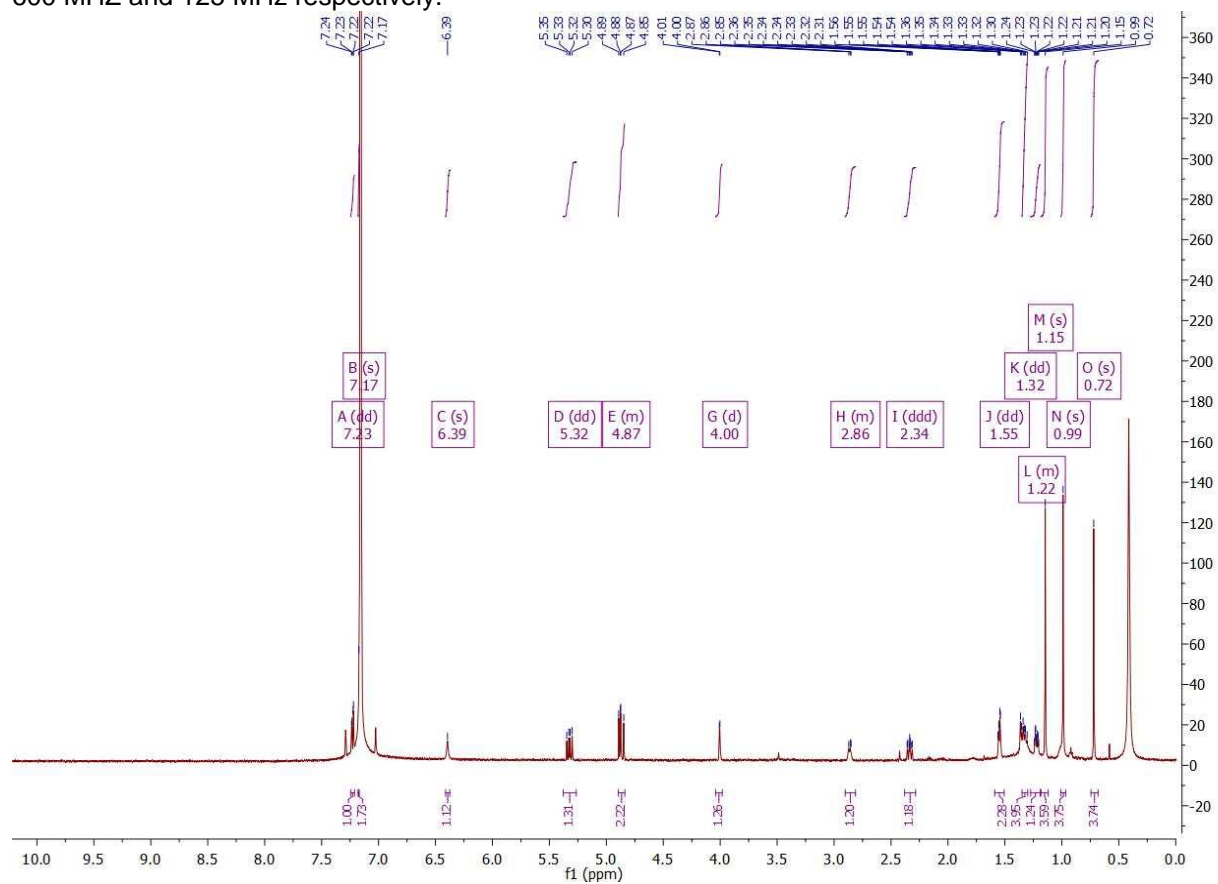

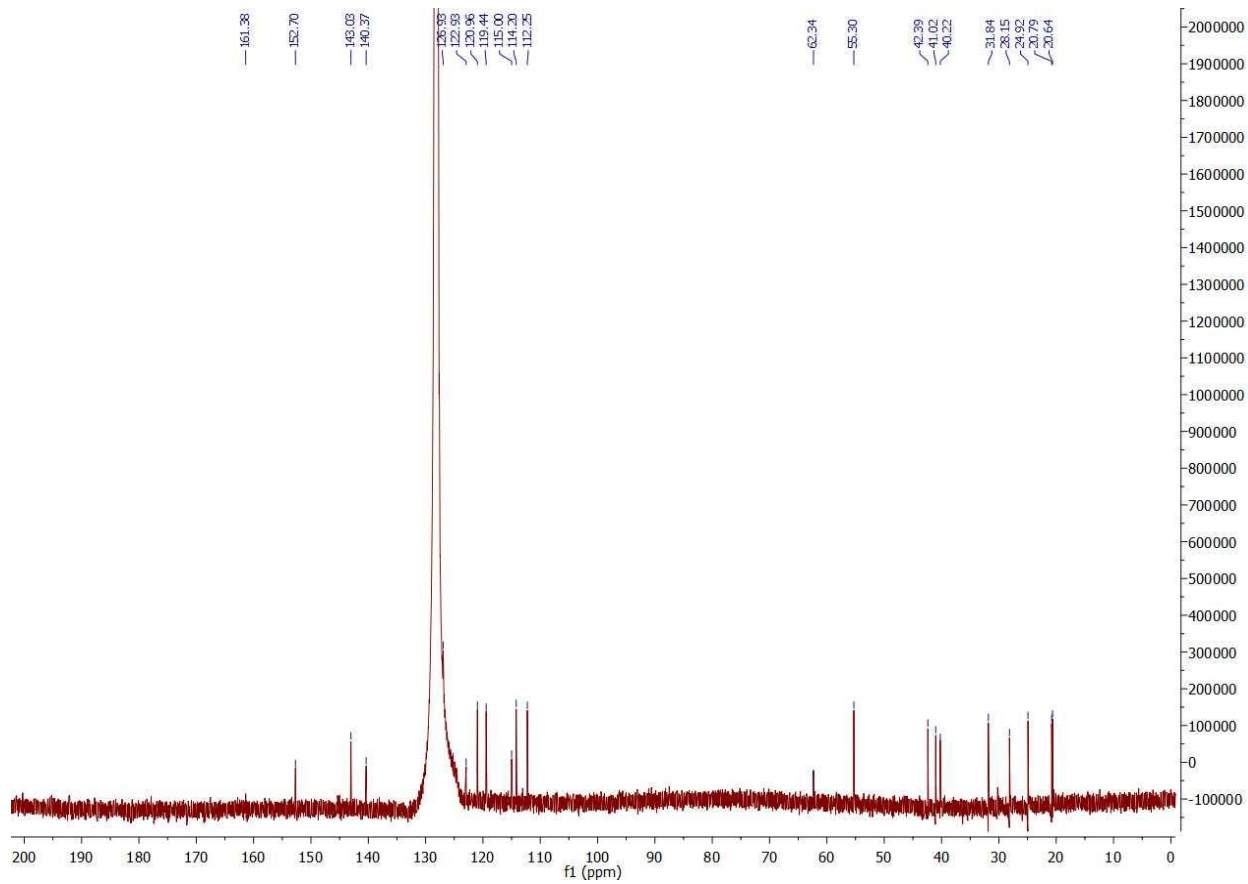

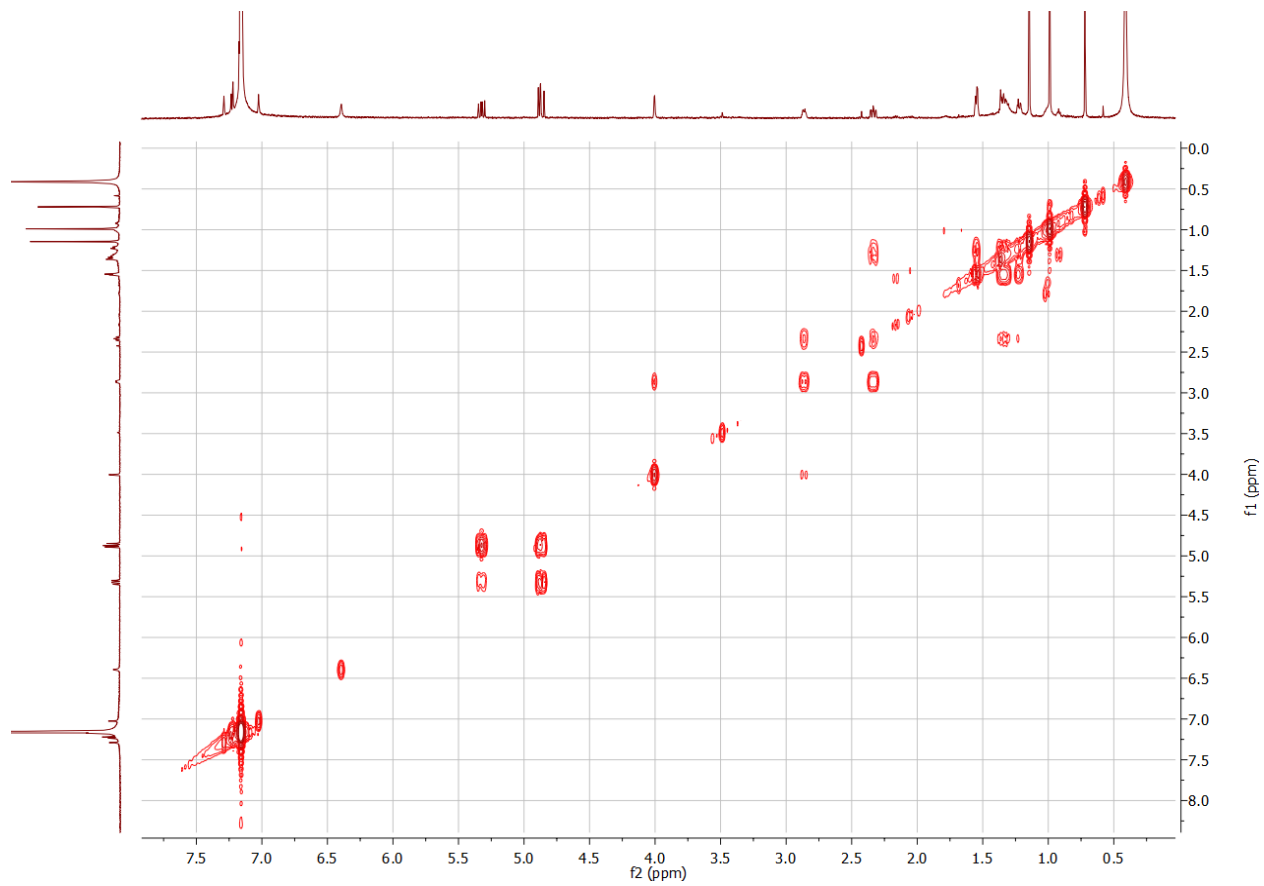

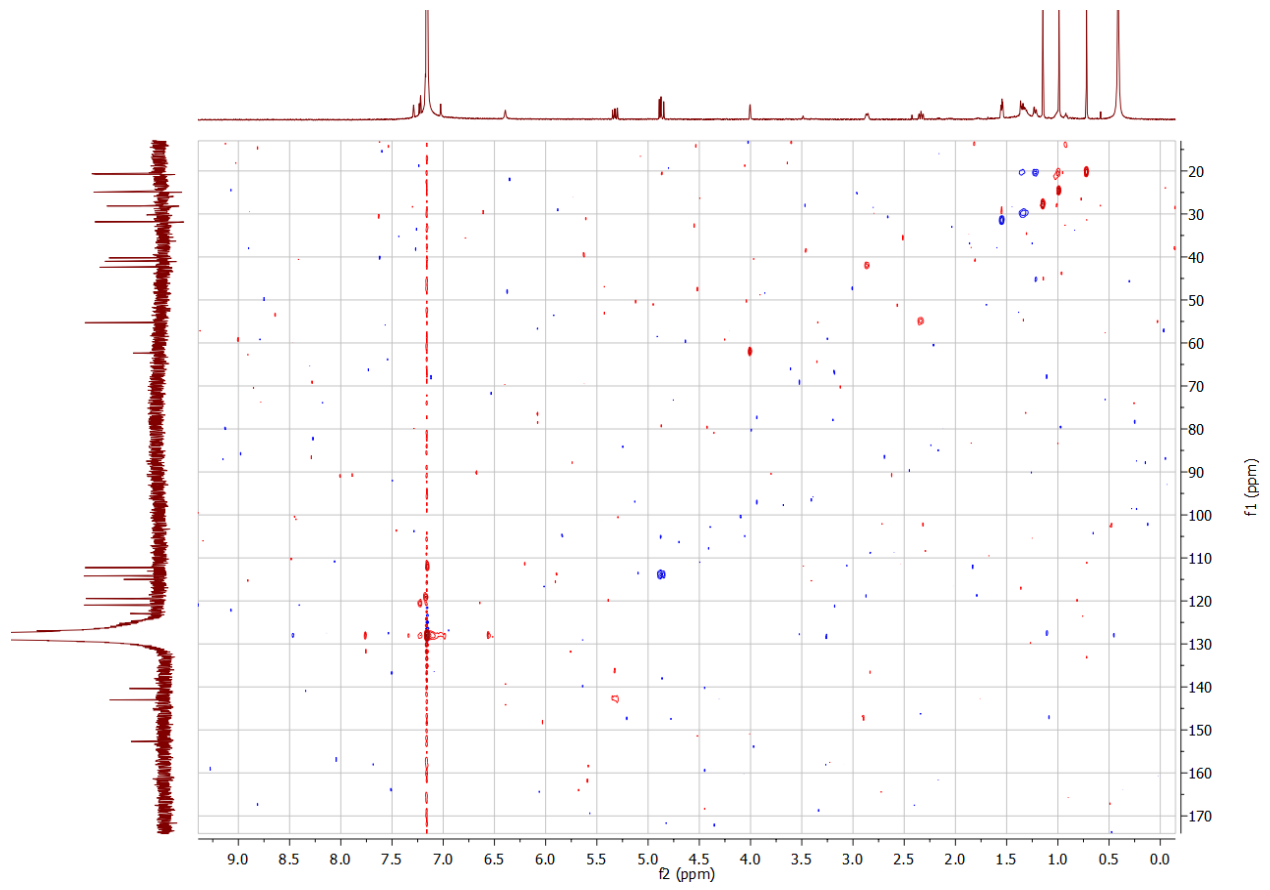

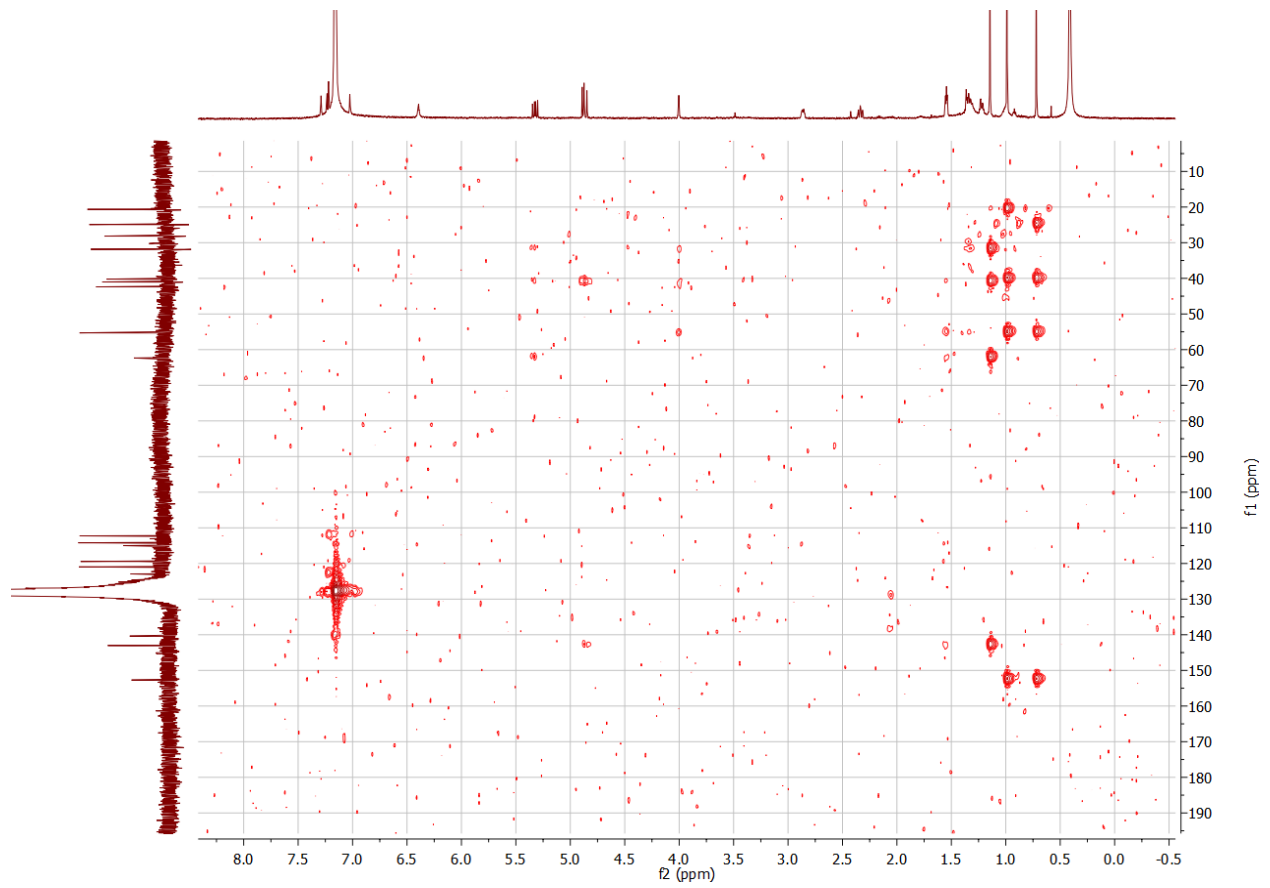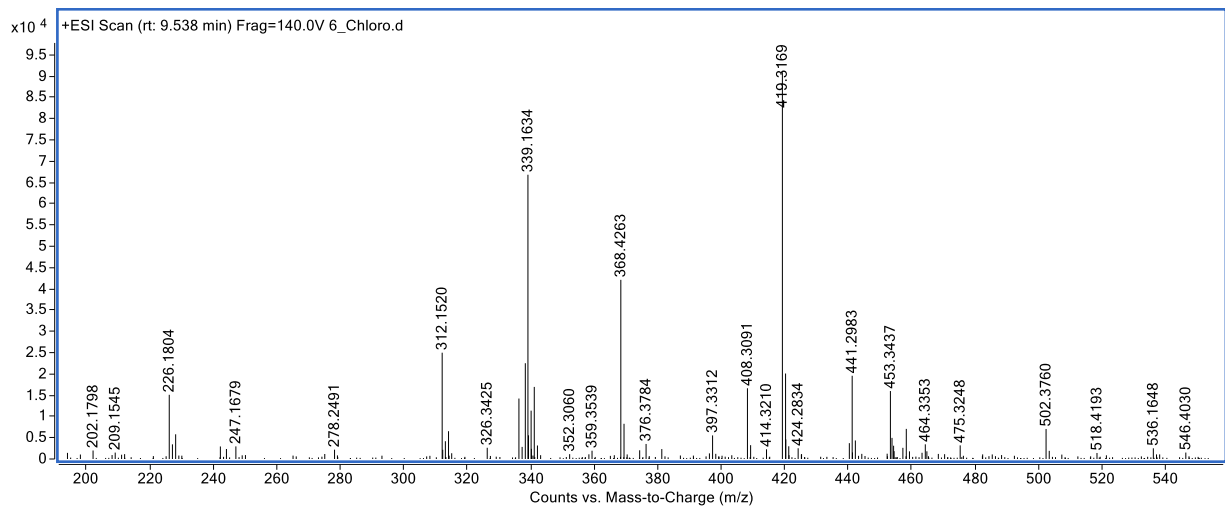

Calc.  $[M+H]^+$  339.1623 Obsv. 339.1634

$^1\text{H}$ ,  $^{13}\text{C}$ , COSY, HSQC, HMBC NMR spectra and HRMS of 6-Br-12-*epi*-Fischerindole U (**39**) in  $\text{C}_6\text{D}_6$  at 800 MHz and 201 MHz respectively.

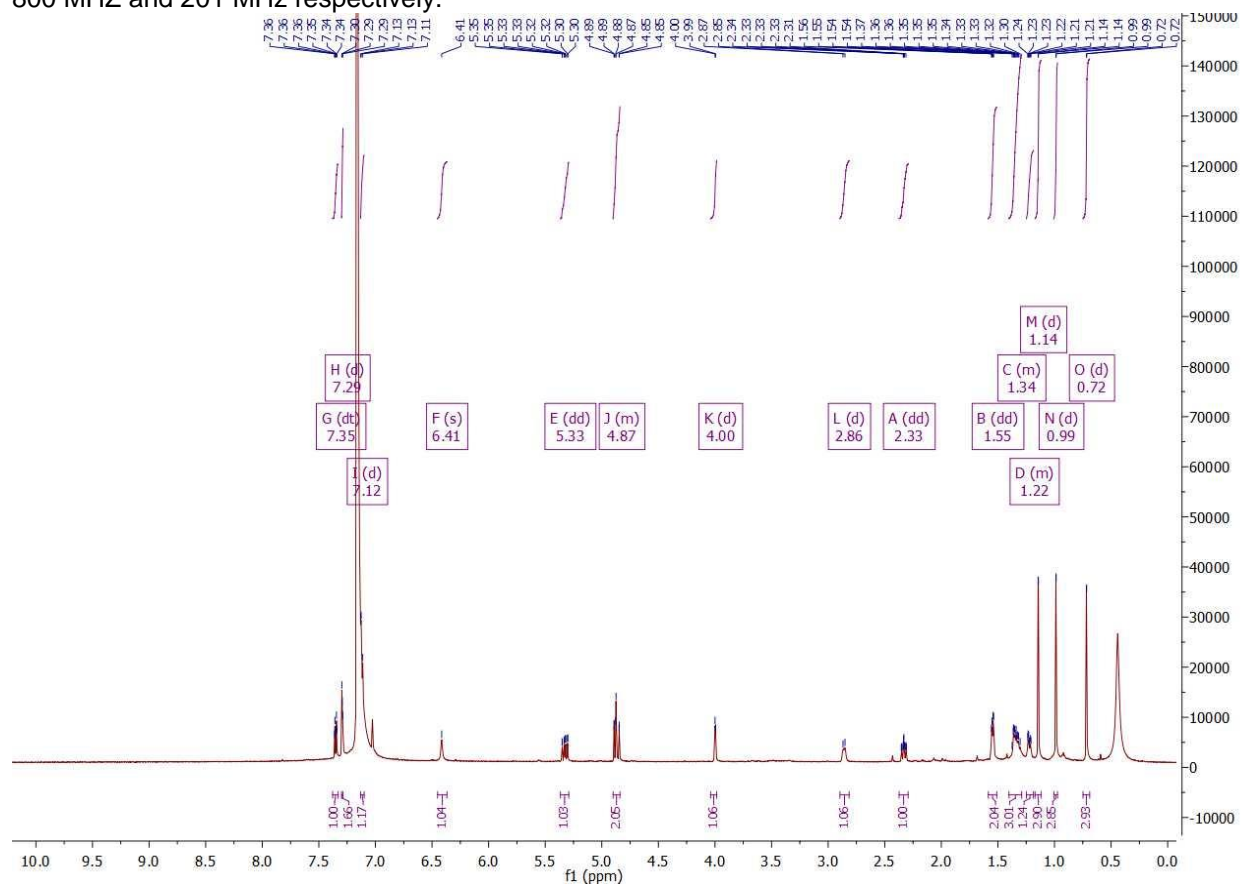



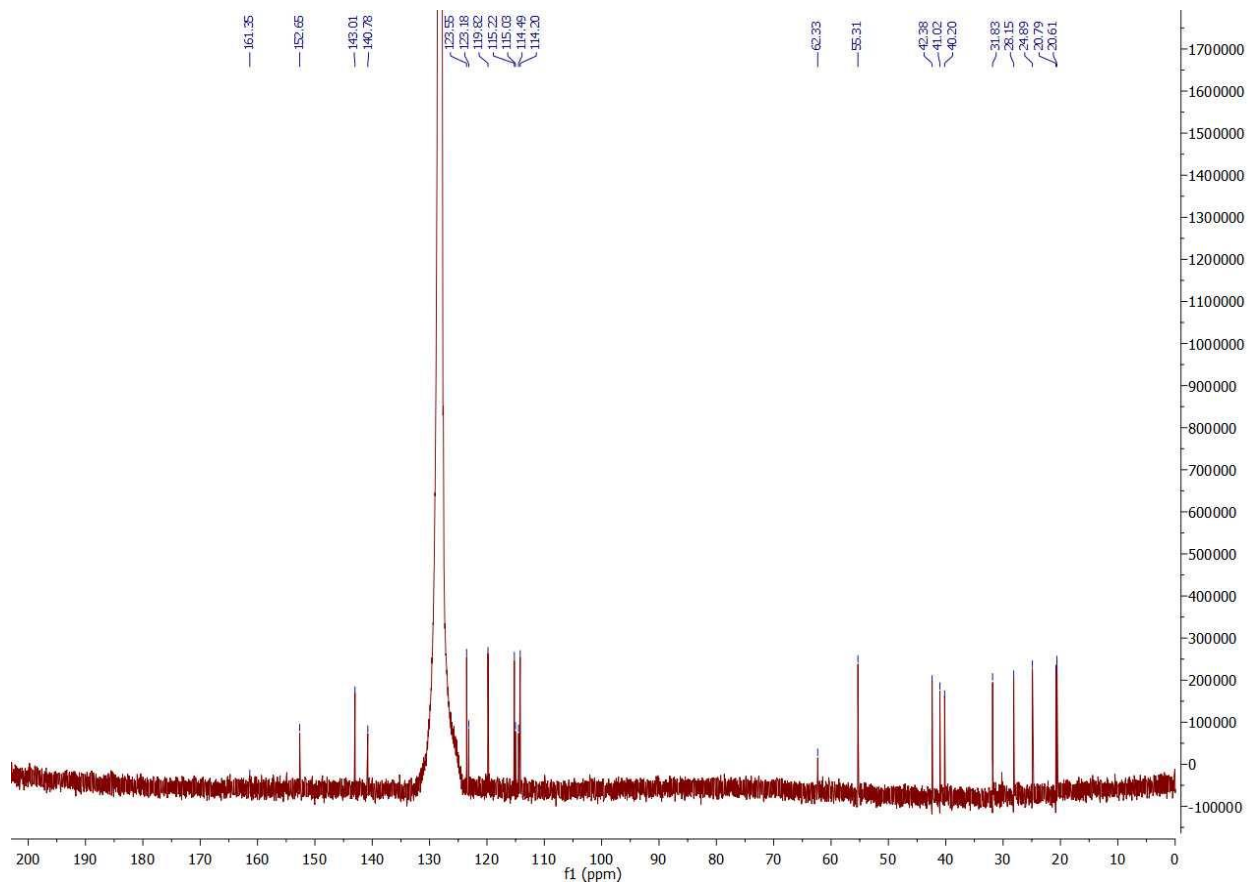

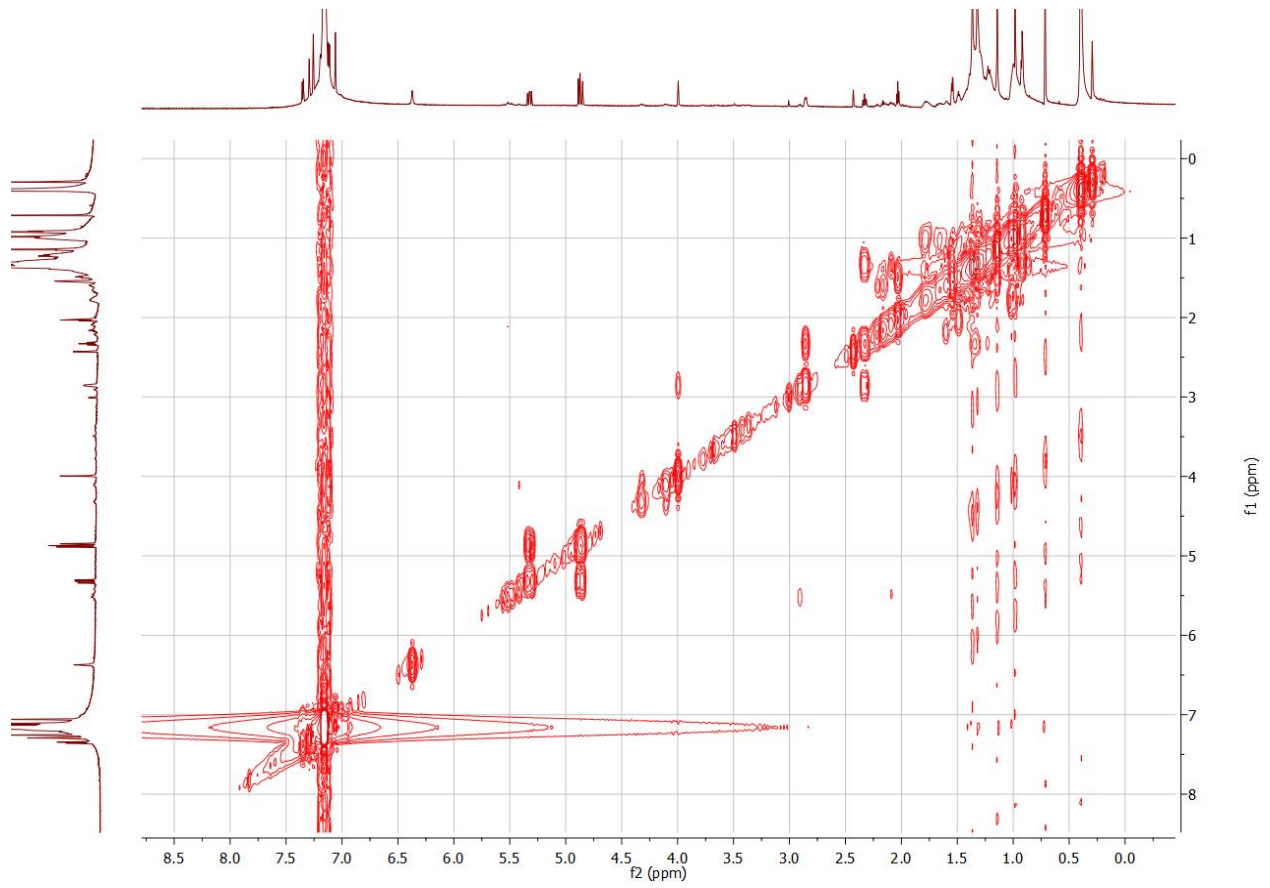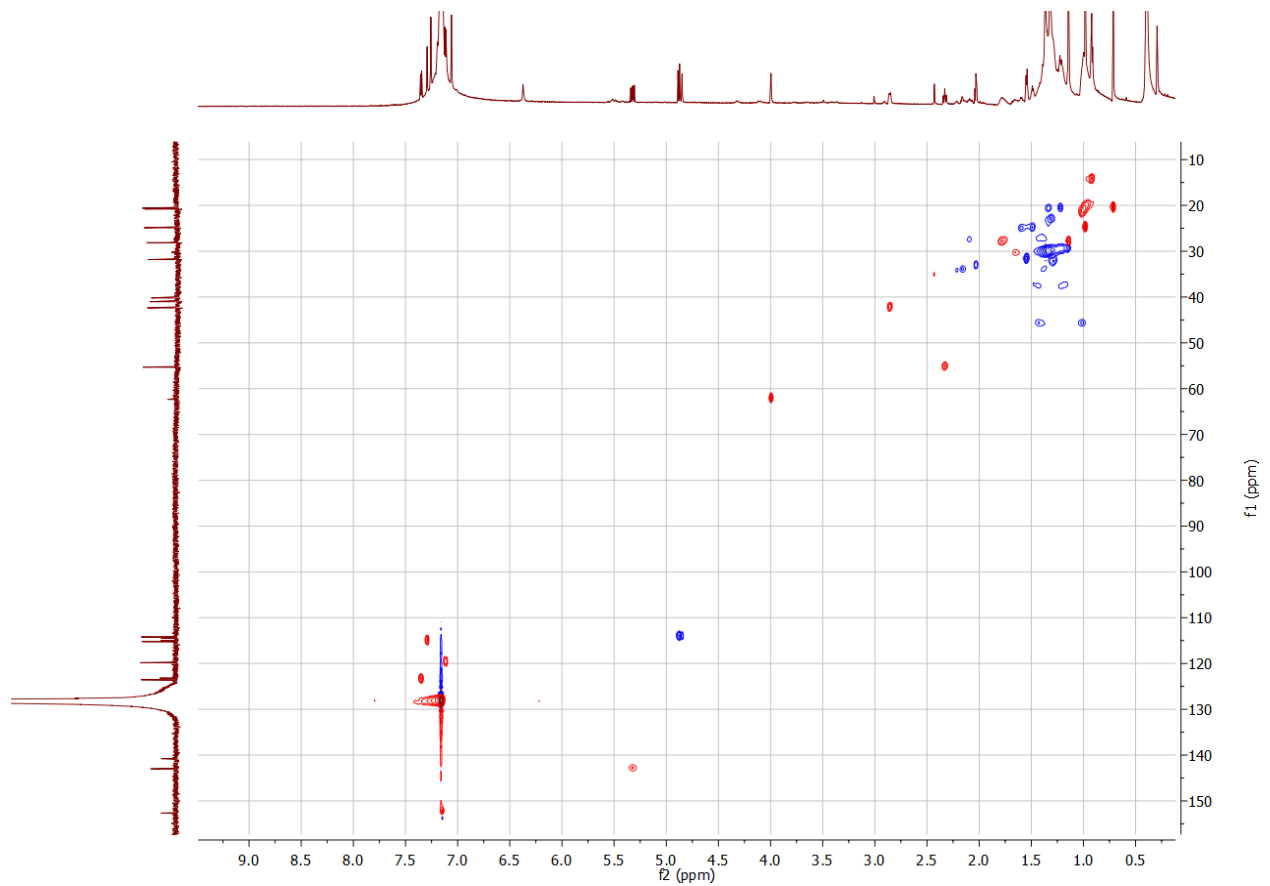

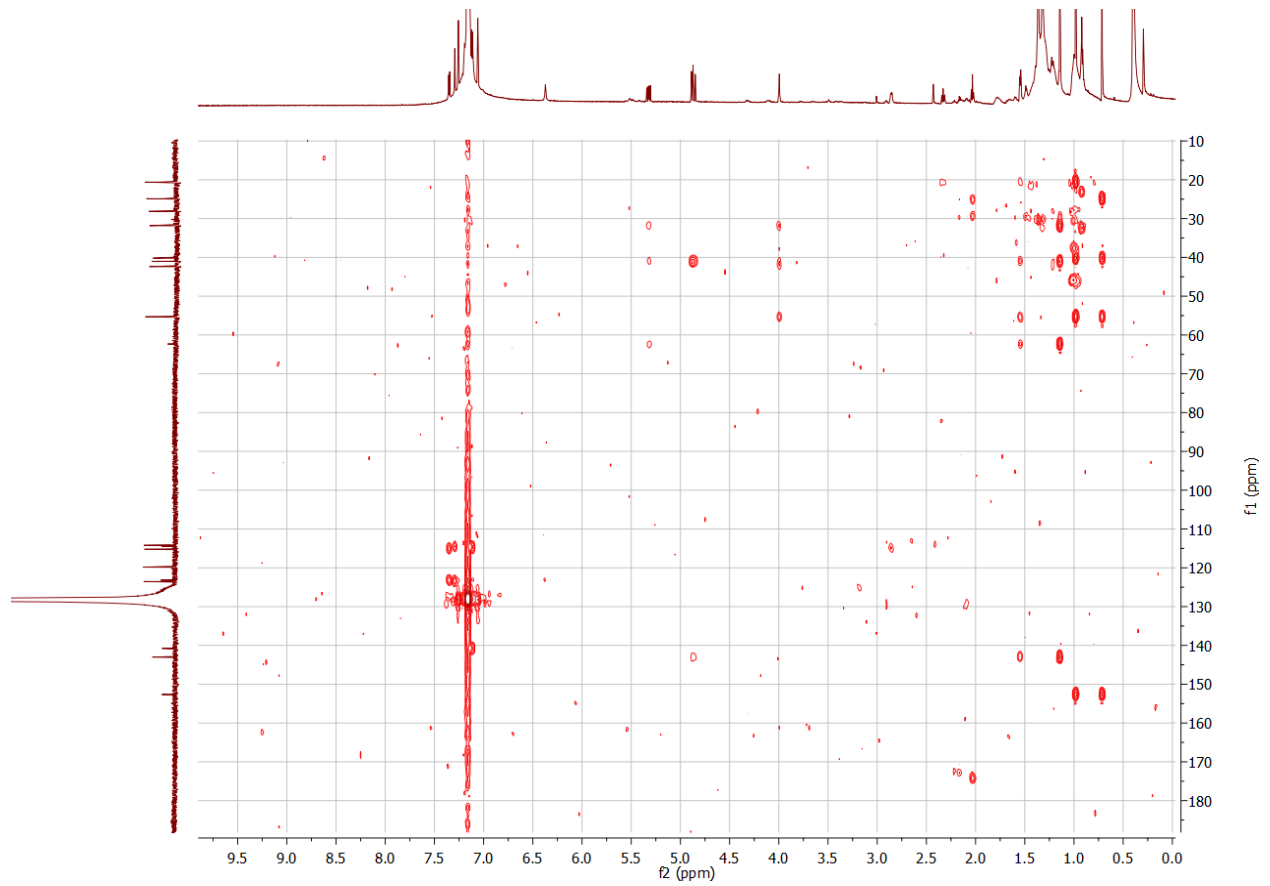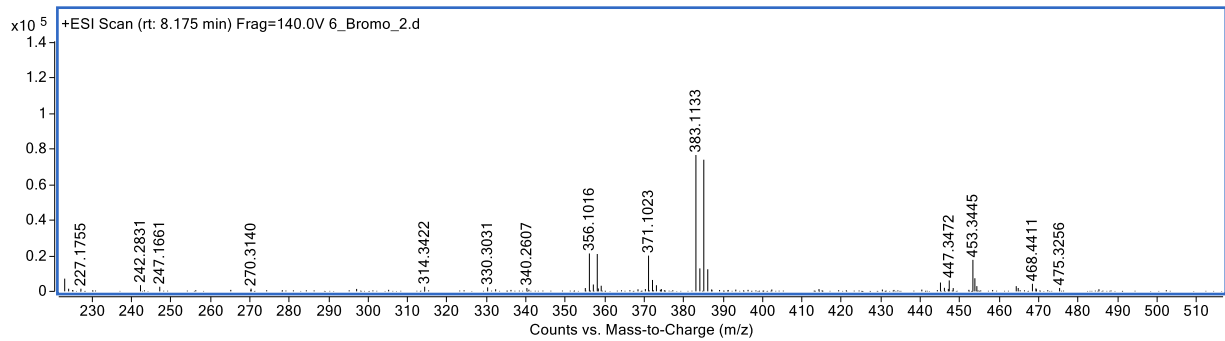

Calc.  $[\text{M}+\text{H}]^+$  383.1117 Obsv. 383.1133

$^1\text{H}$ ,  $^{13}\text{C}$ , COSY, HSQC, HMBC NMR spectra and HRMS of 5-OMe-12-*epi*-Fischerindole U (**35**) in  $\text{C}_6\text{D}_6$  at 800 MHz and 201 MHz respectively.

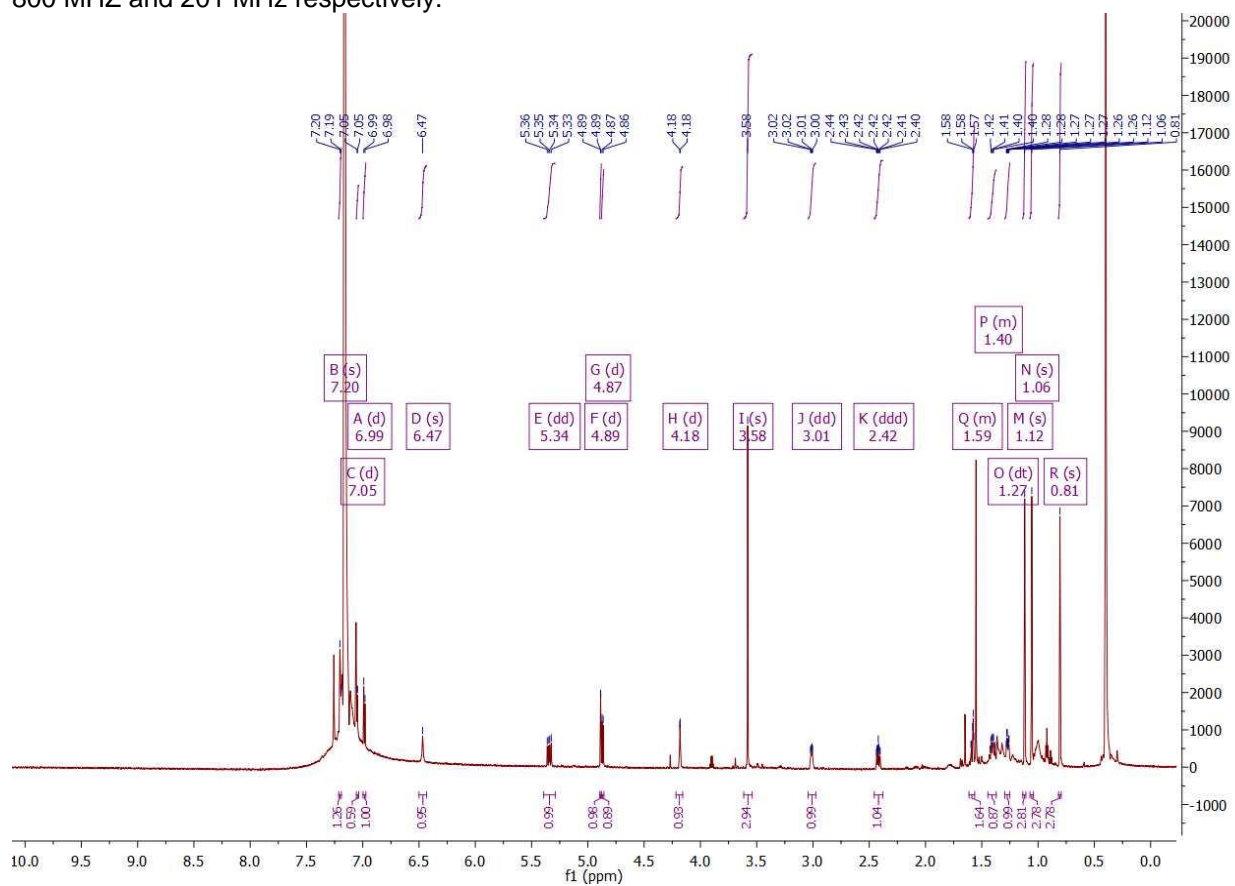

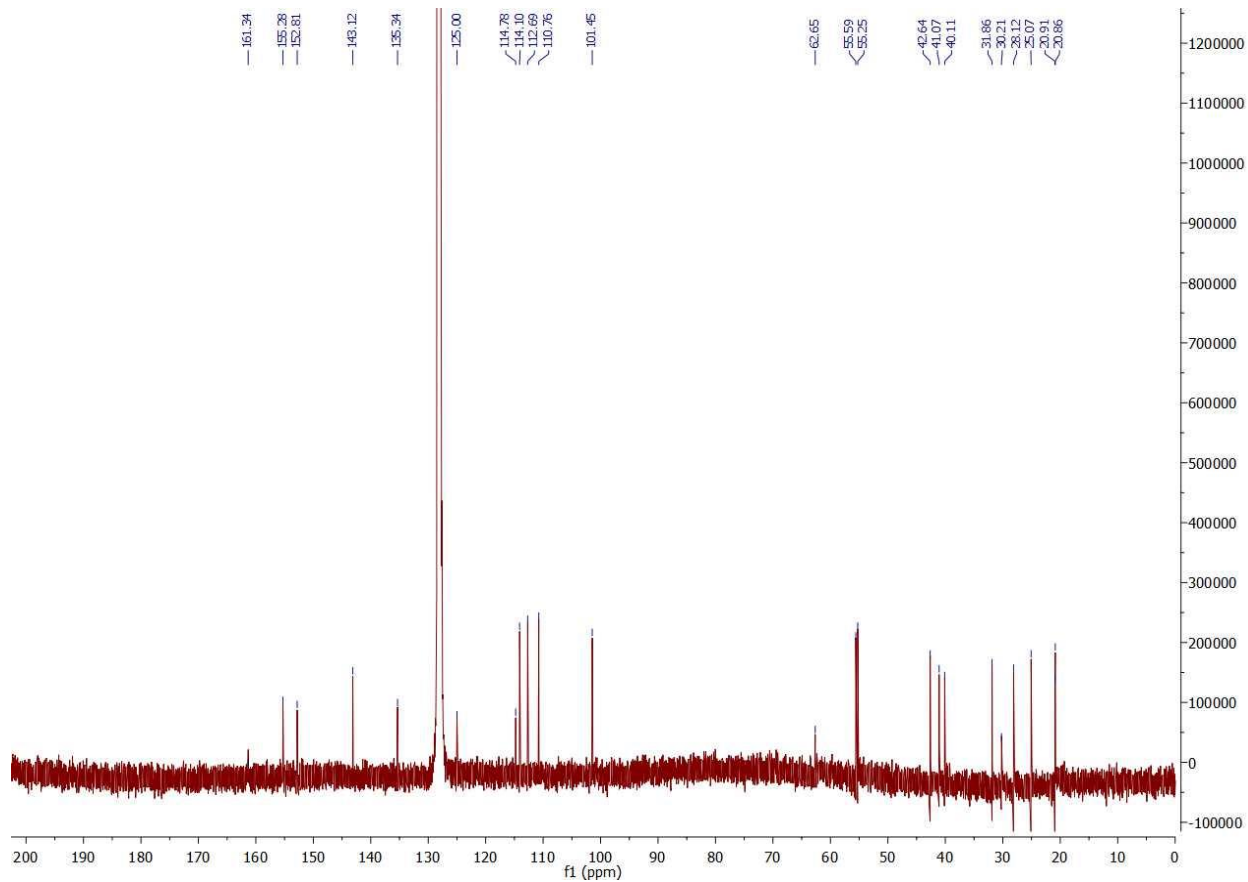

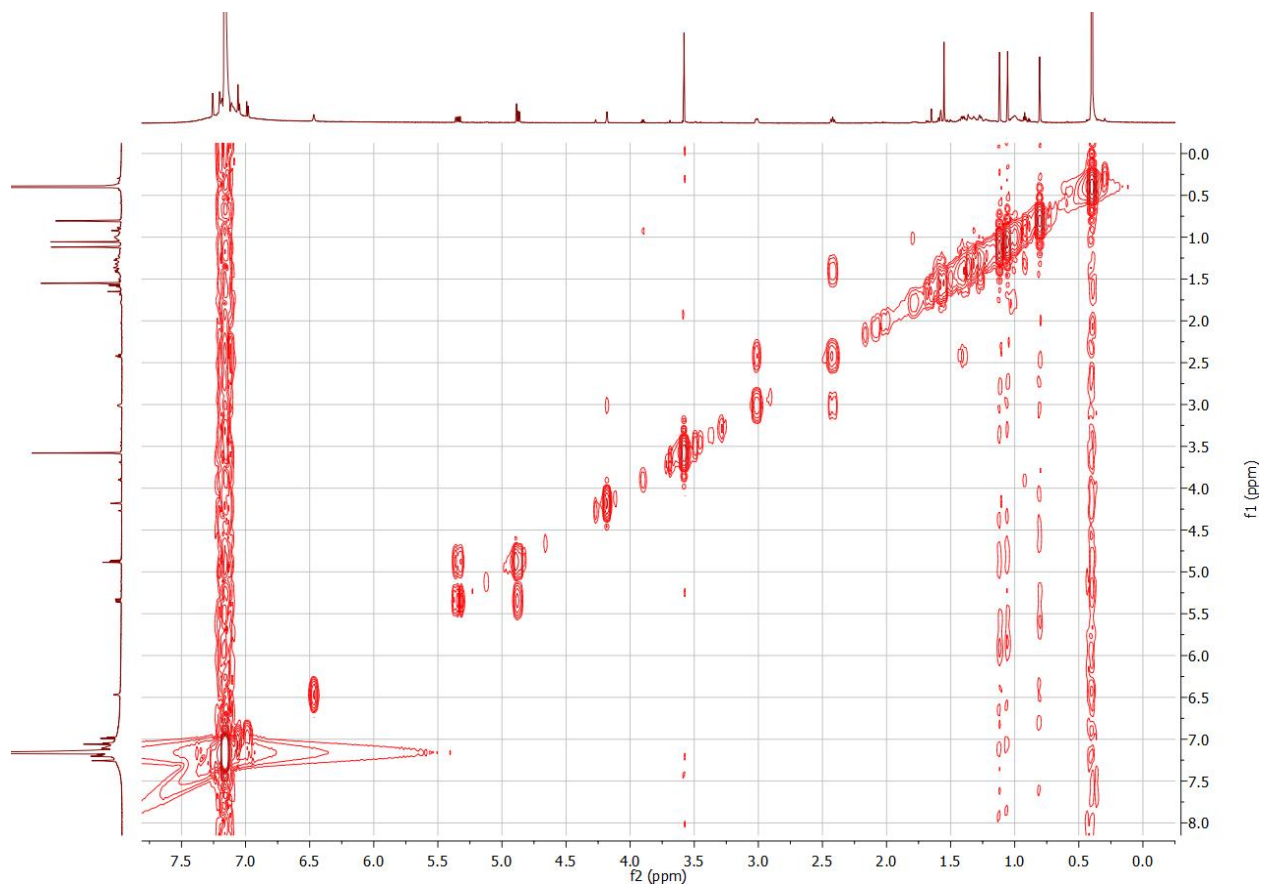

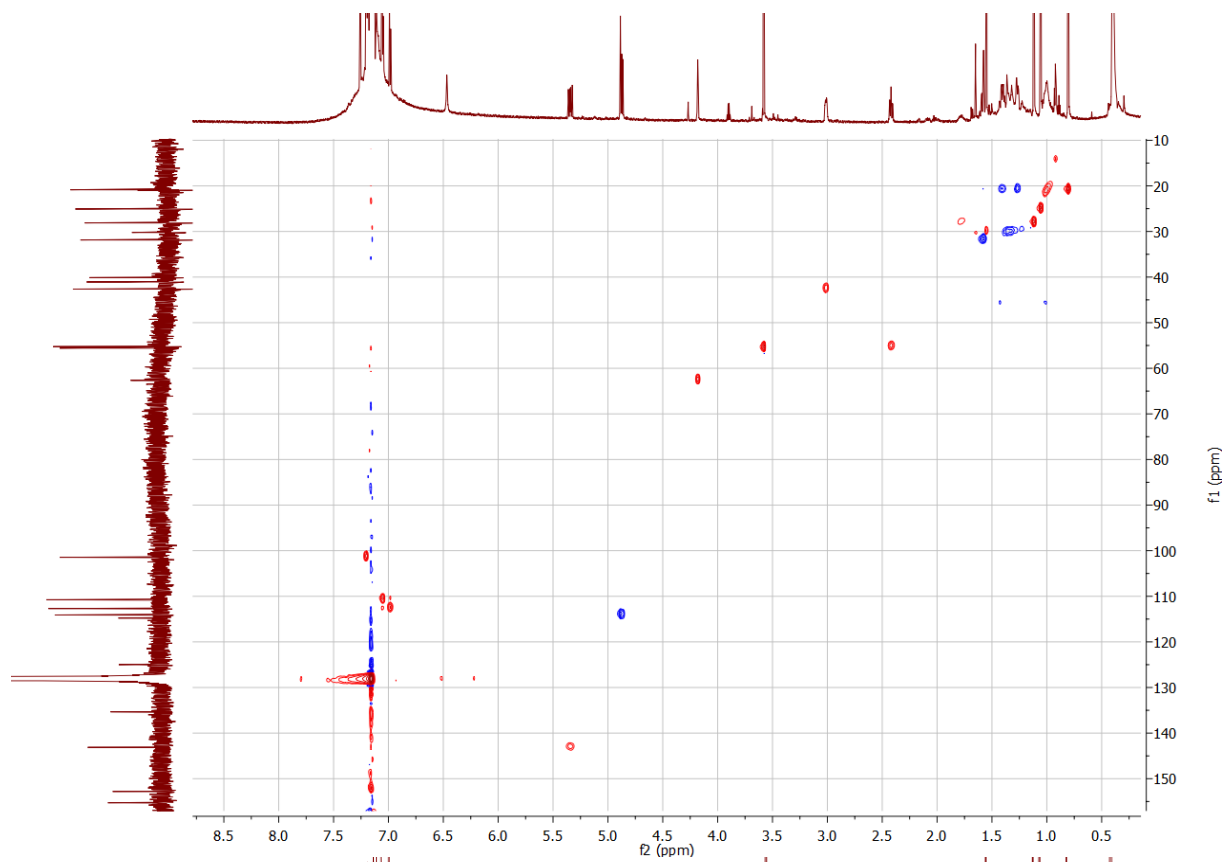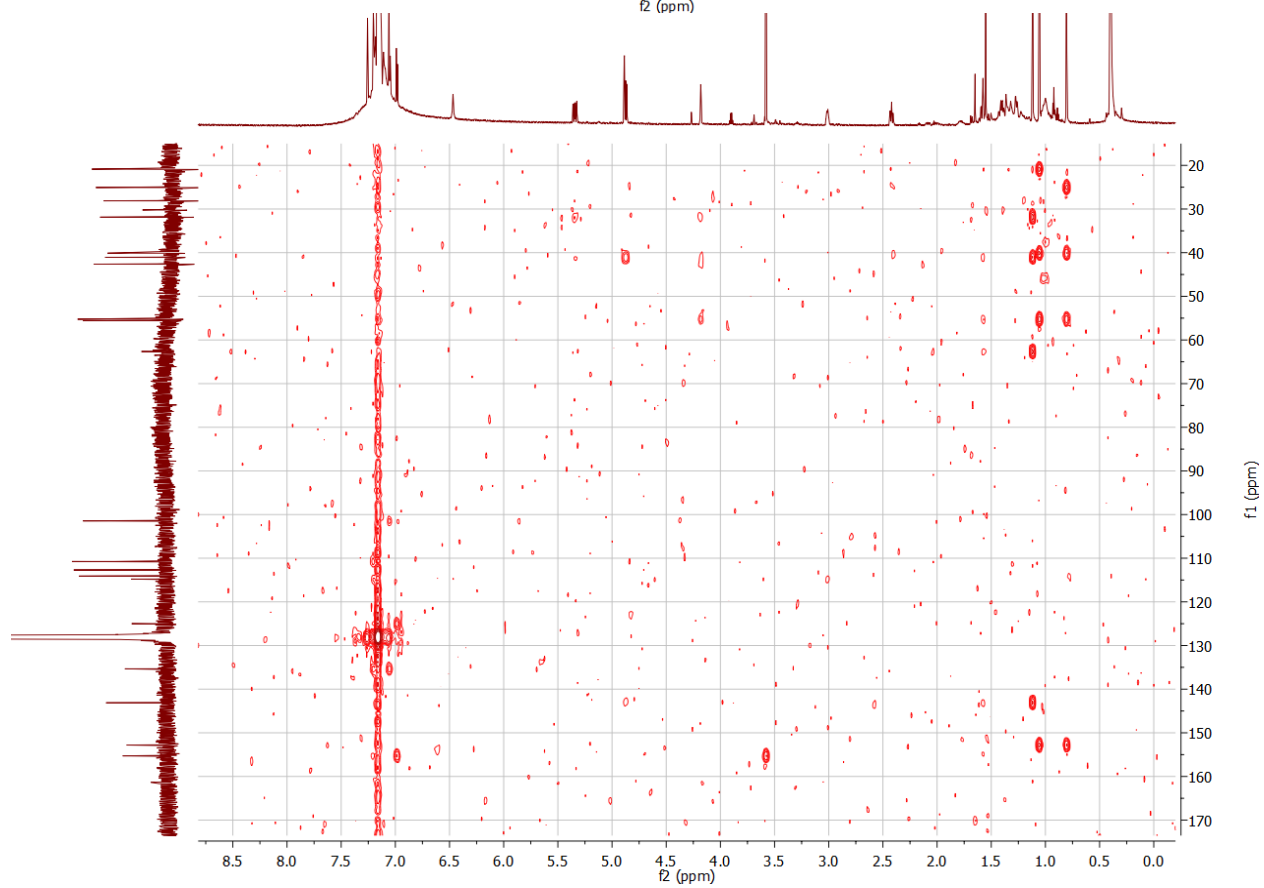

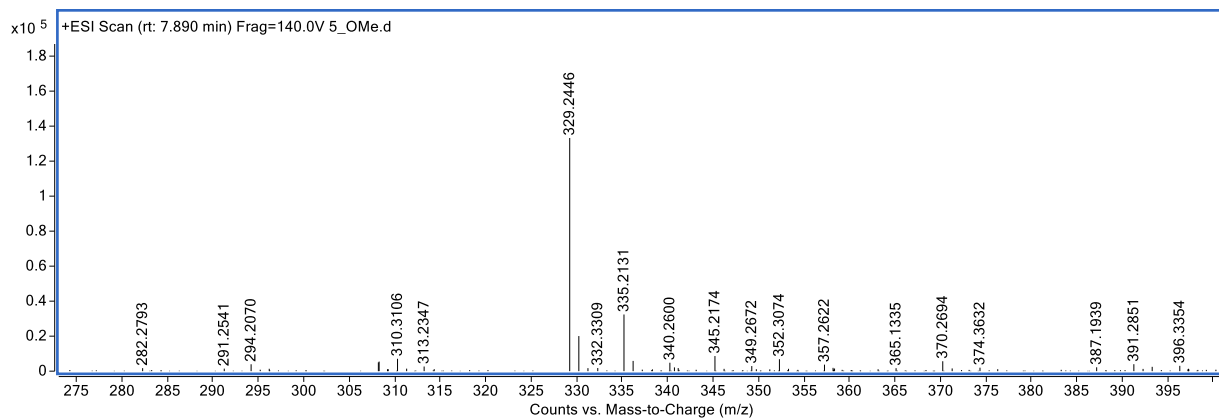

Calc.  $[M+H]^+$  335.2118 Obsv. 335.2131



$^1\text{H}$ ,  $^{13}\text{C}$ , COSY, HSQC, HMBC, NOESY NMR spectra and HRMS of 12-*epi*-Fischerindole U Nitrile (**40**) in  $\text{C}_6\text{D}_6$  at 800 MHz and 201 MHz respectively.

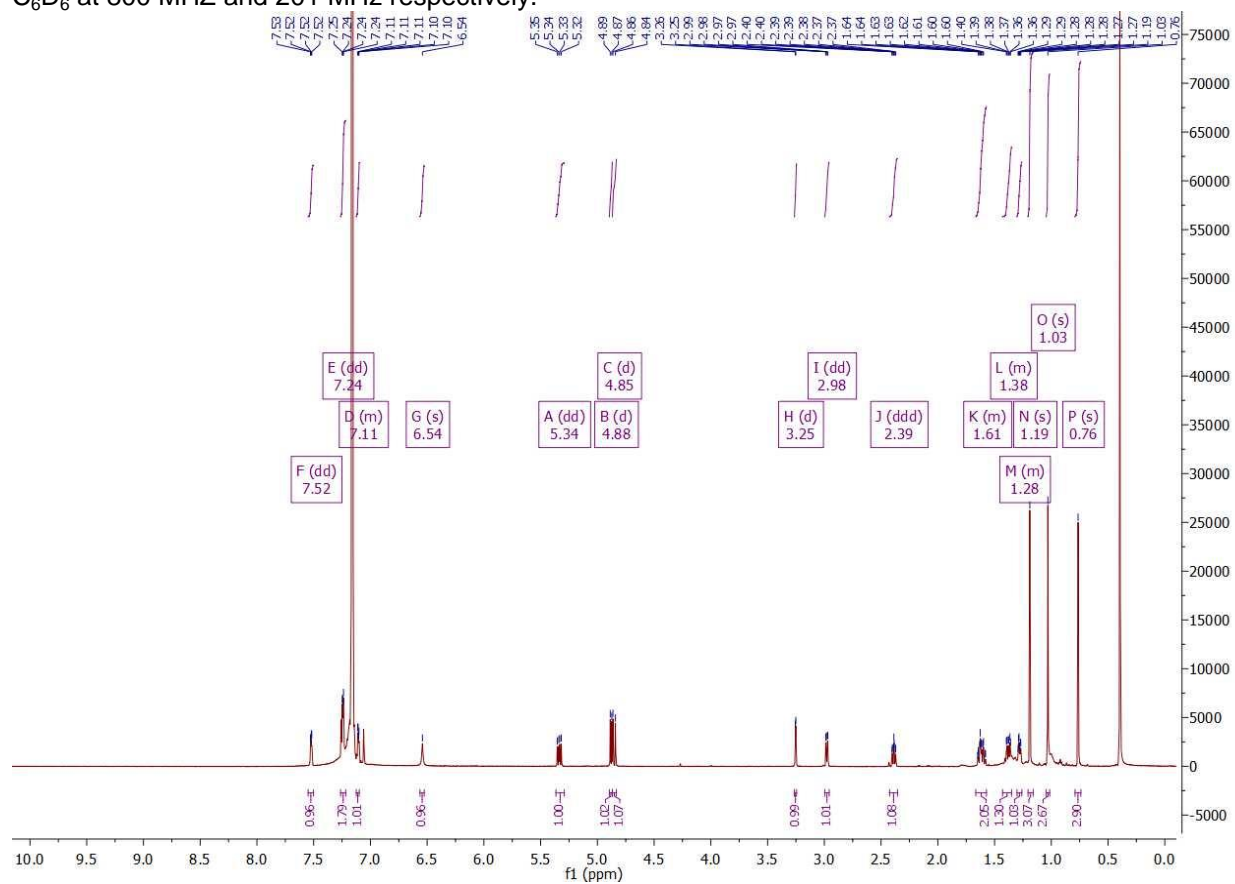

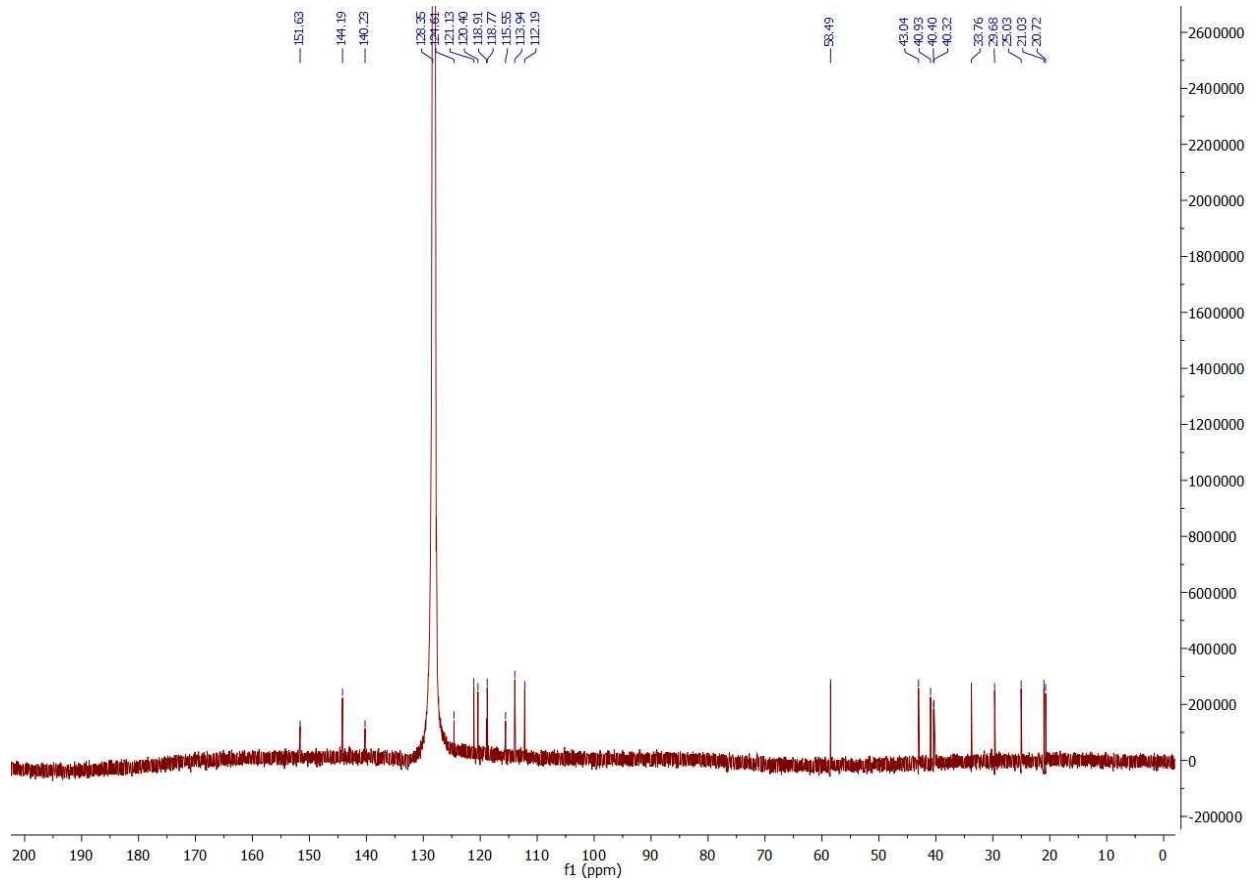

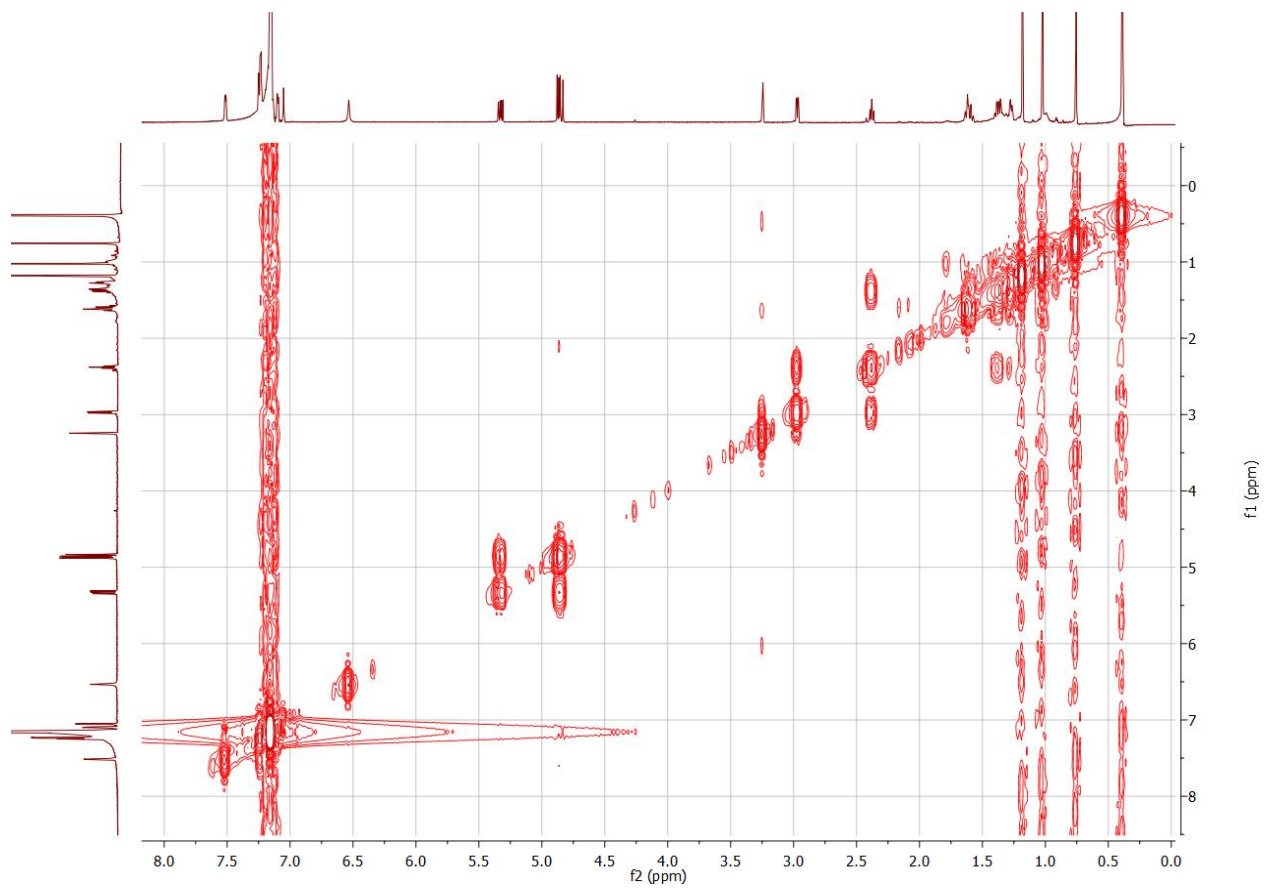

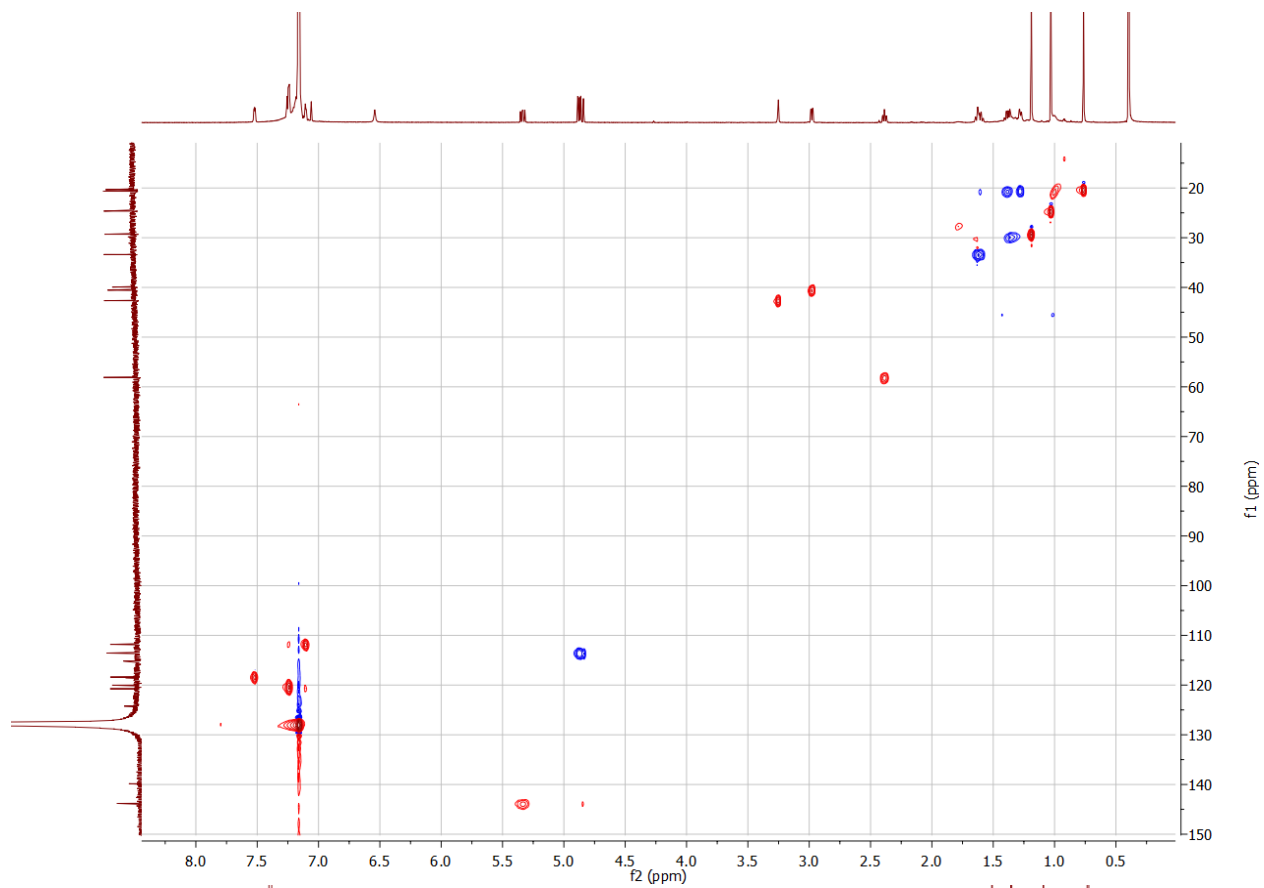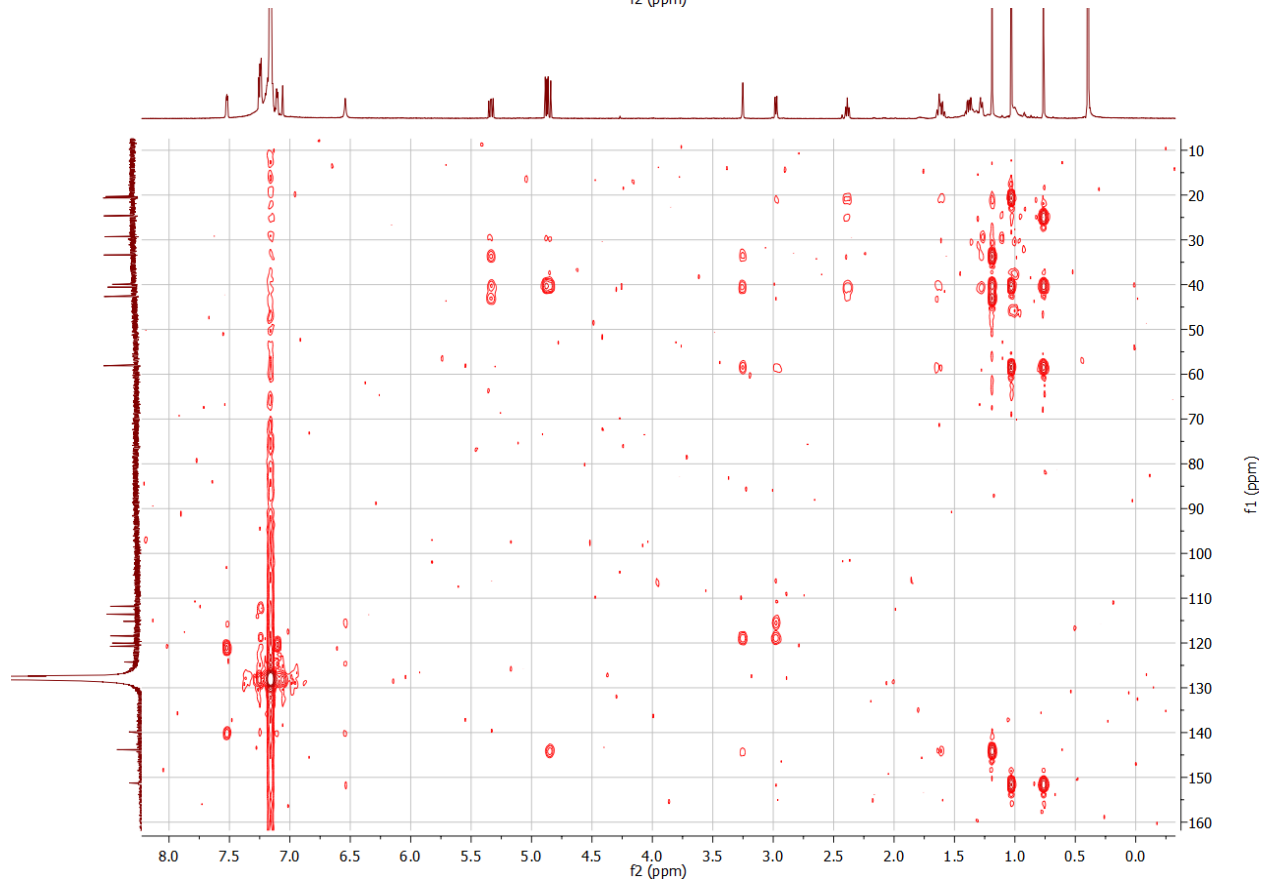

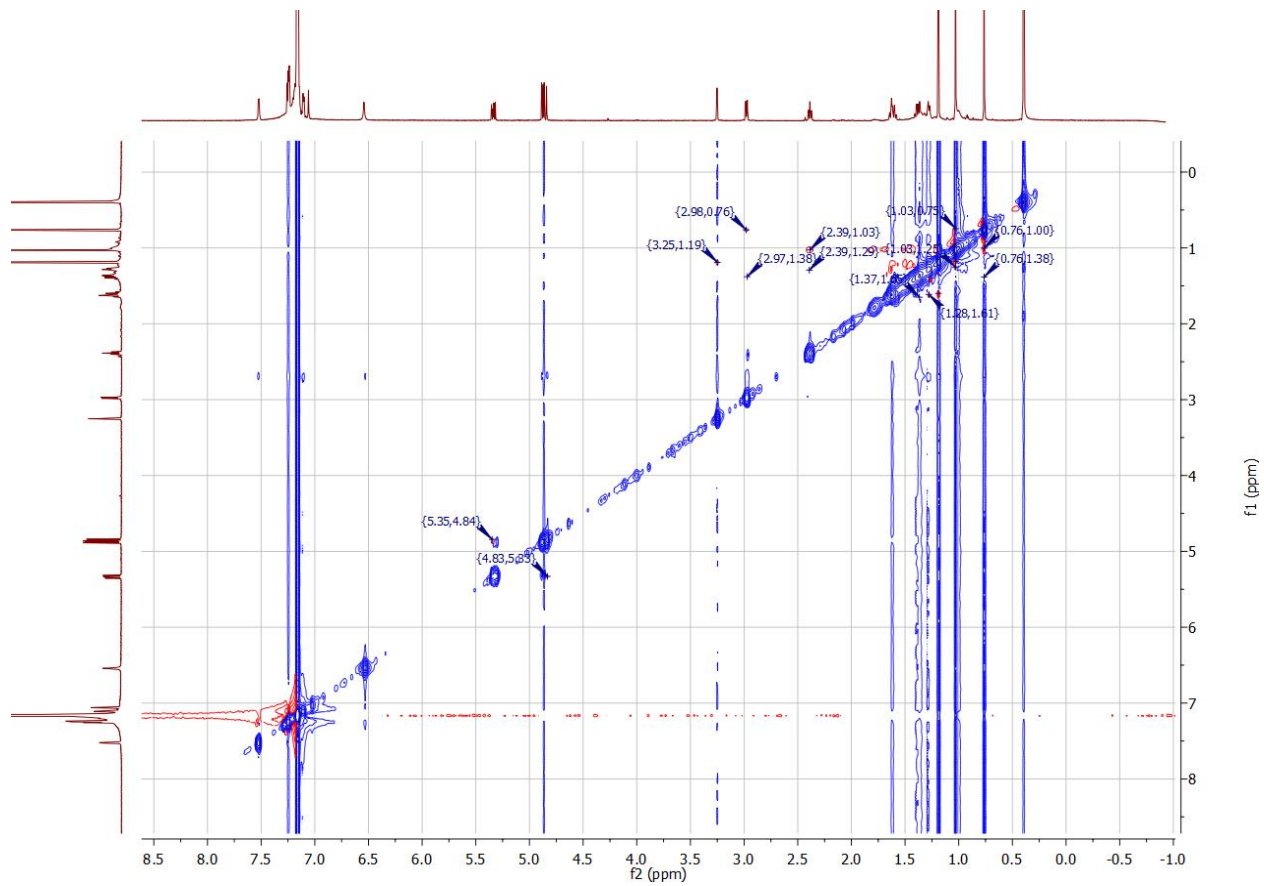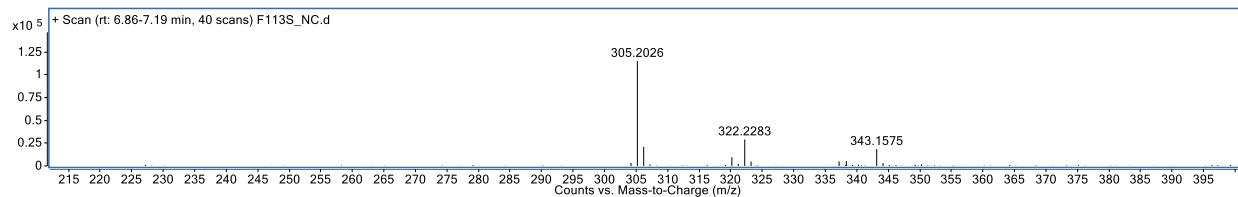

Calc. [M+H]<sup>+</sup> 305.2012 Obsv. 305.2026

$^1\text{H}$ ,  $^{13}\text{C}$ , COSY, HSQC, HMBC NMR spectra and HRMS of 7-Aza-12-*epi*-Fischerindole U (**36**) in  $\text{C}_6\text{D}_6$  at 800 MHz and 201 MHz respectively.

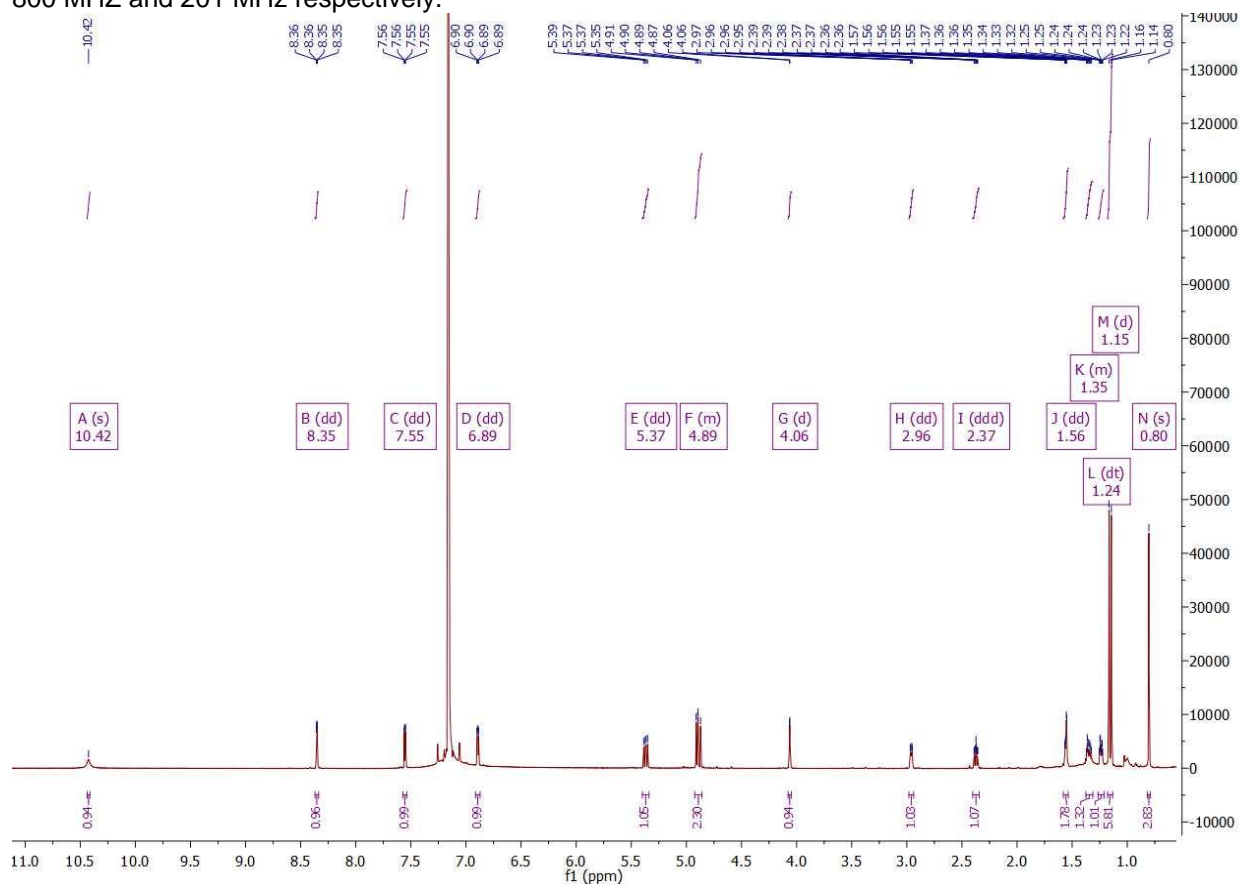

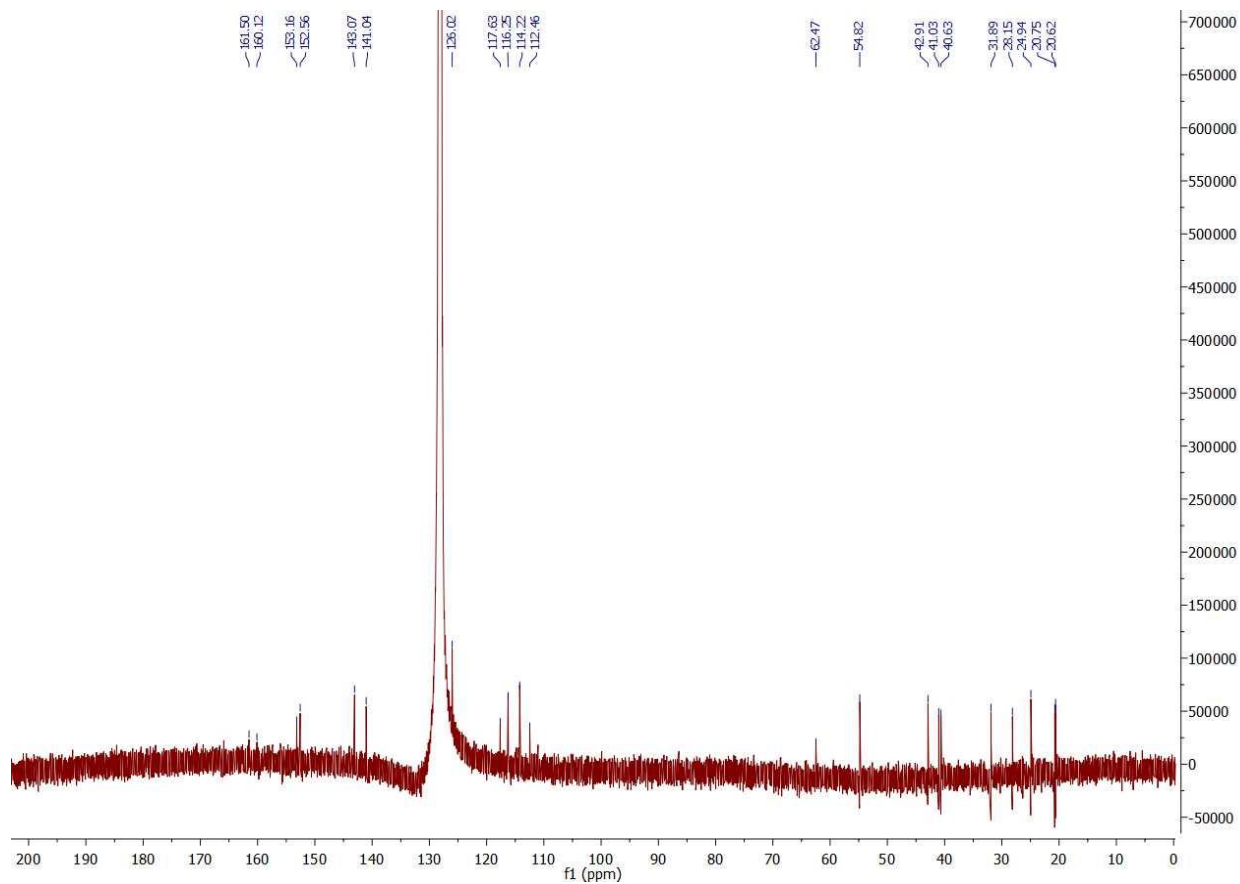

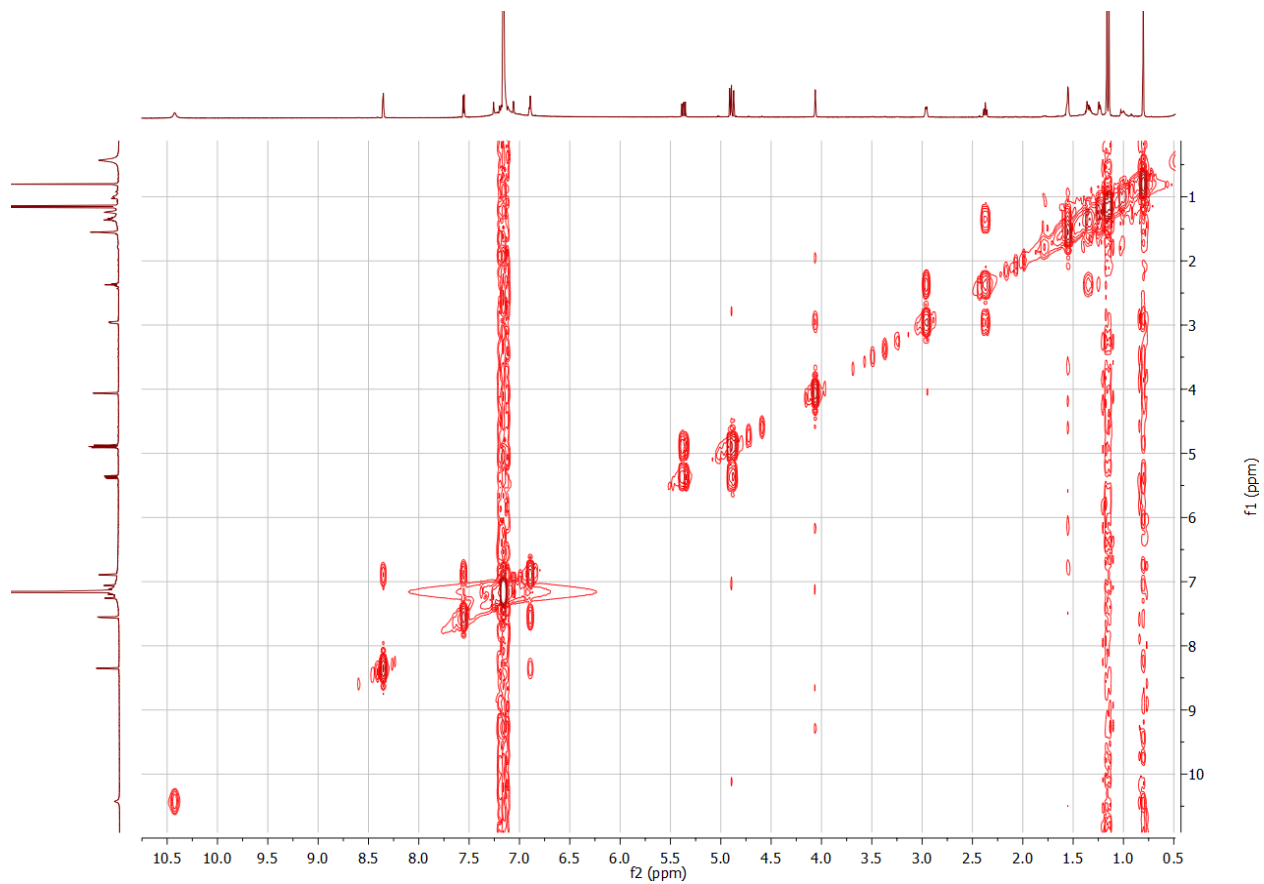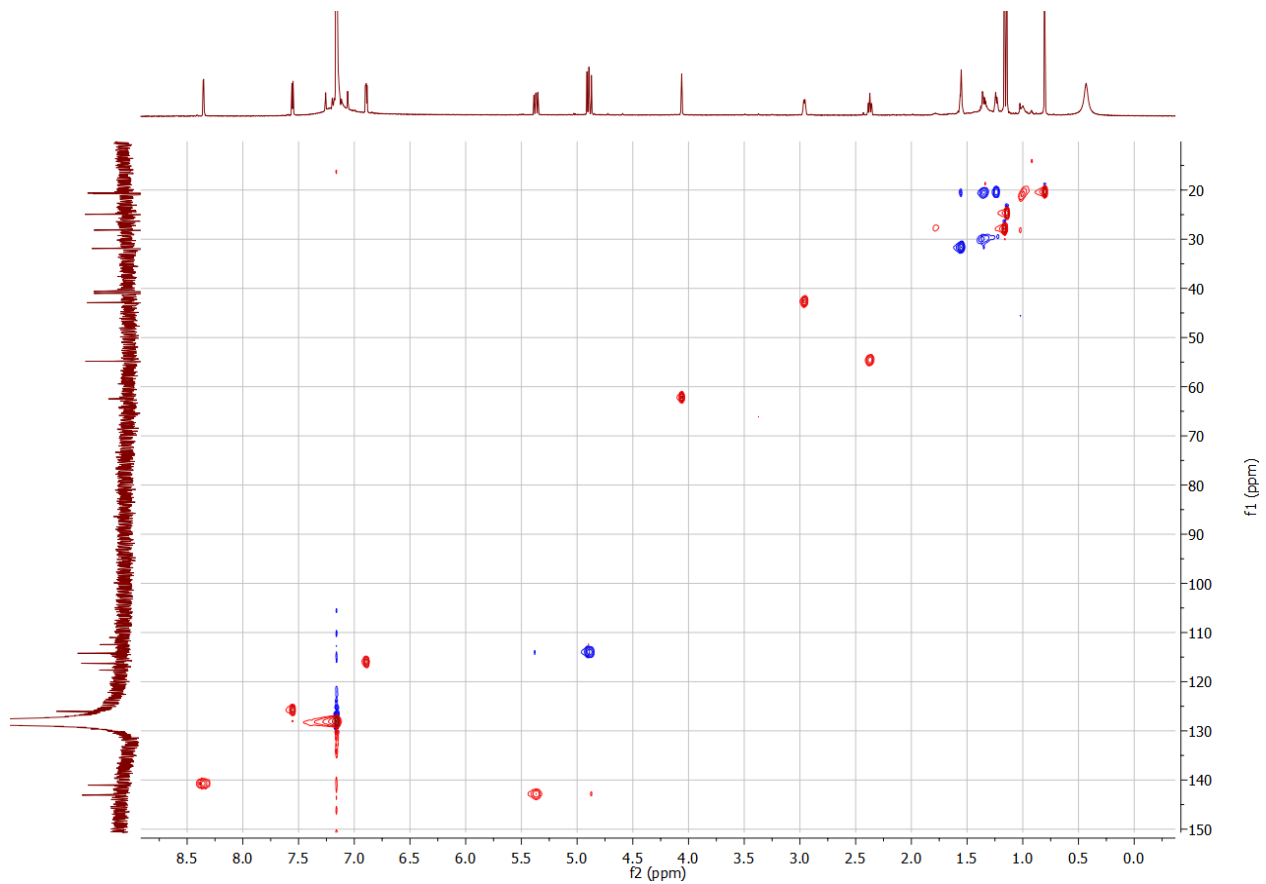

S120



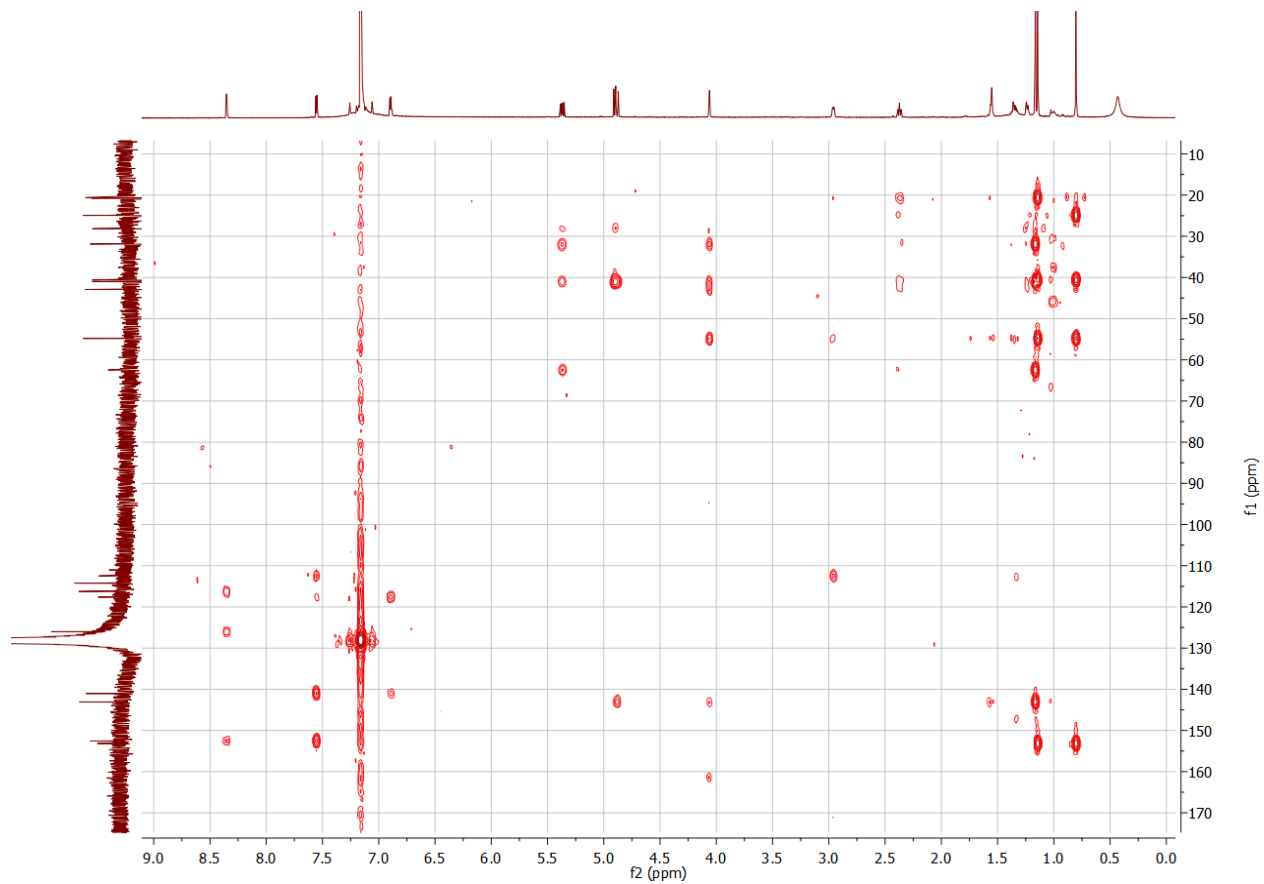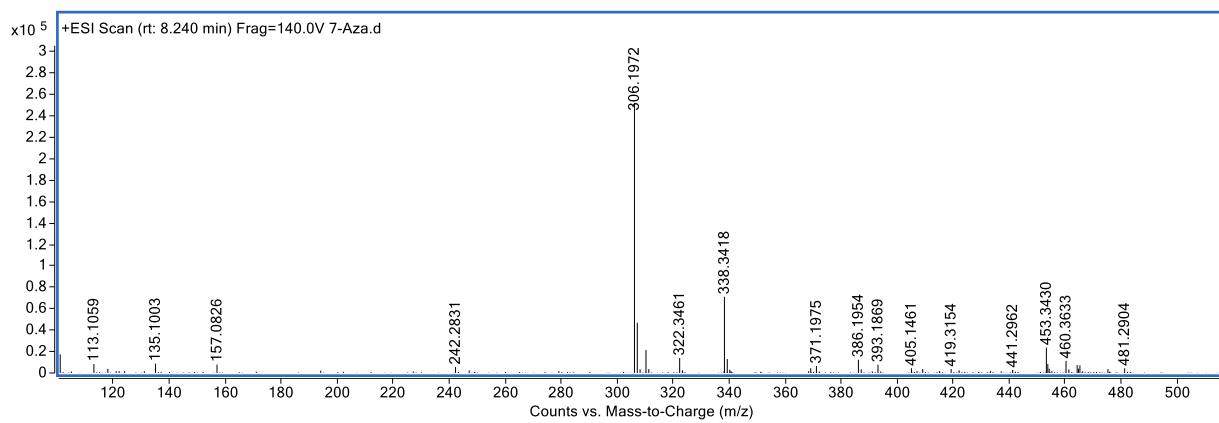

Calc.  $[M+H]^+$  306.1965 Obsv. 306.1972

$^1\text{H}$ ,  $^{13}\text{C}$ , COSY, HSQC, HMBC NMR spectra and HRMS of 7-Aza-12-*epi*-Hapalindole C (**31**) in  $\text{C}_6\text{D}_6$  at 600 MHz and 125 MHz respectively.

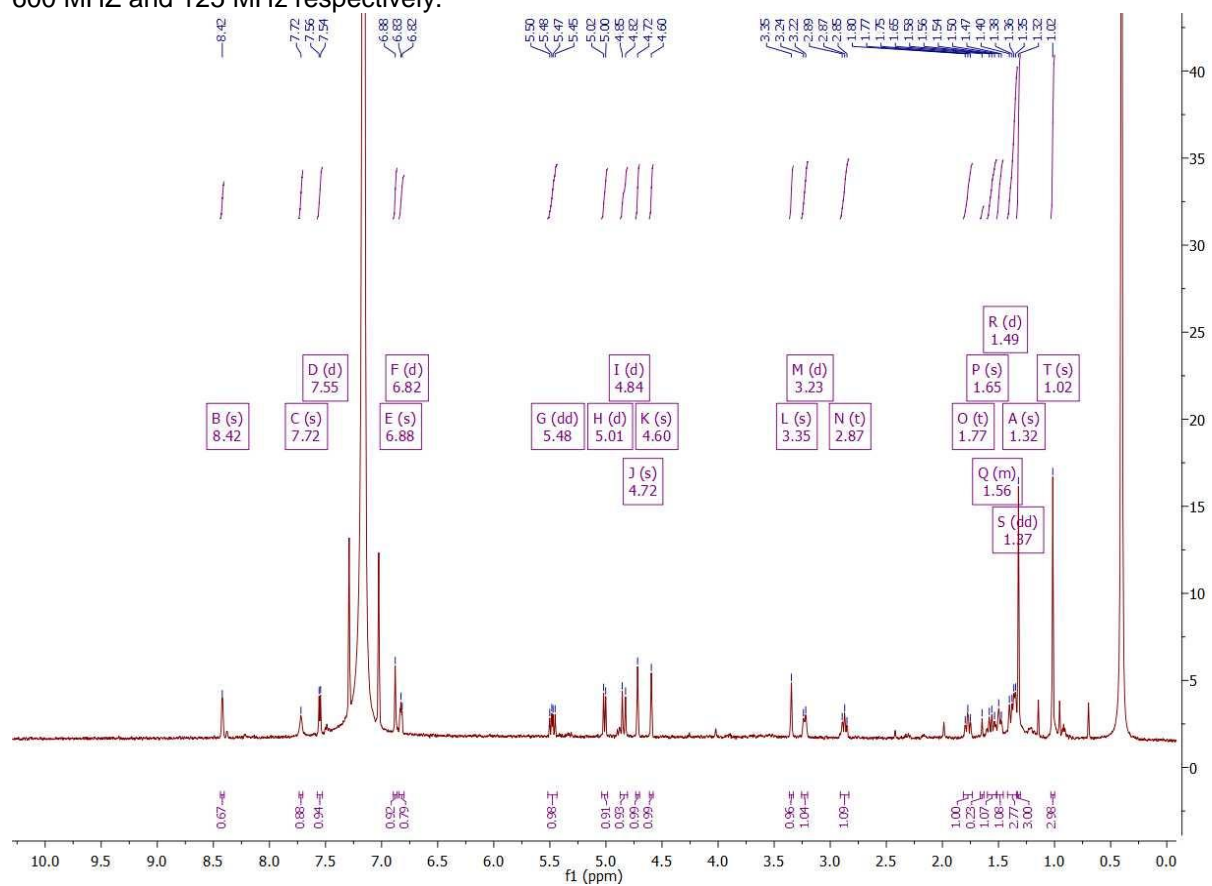

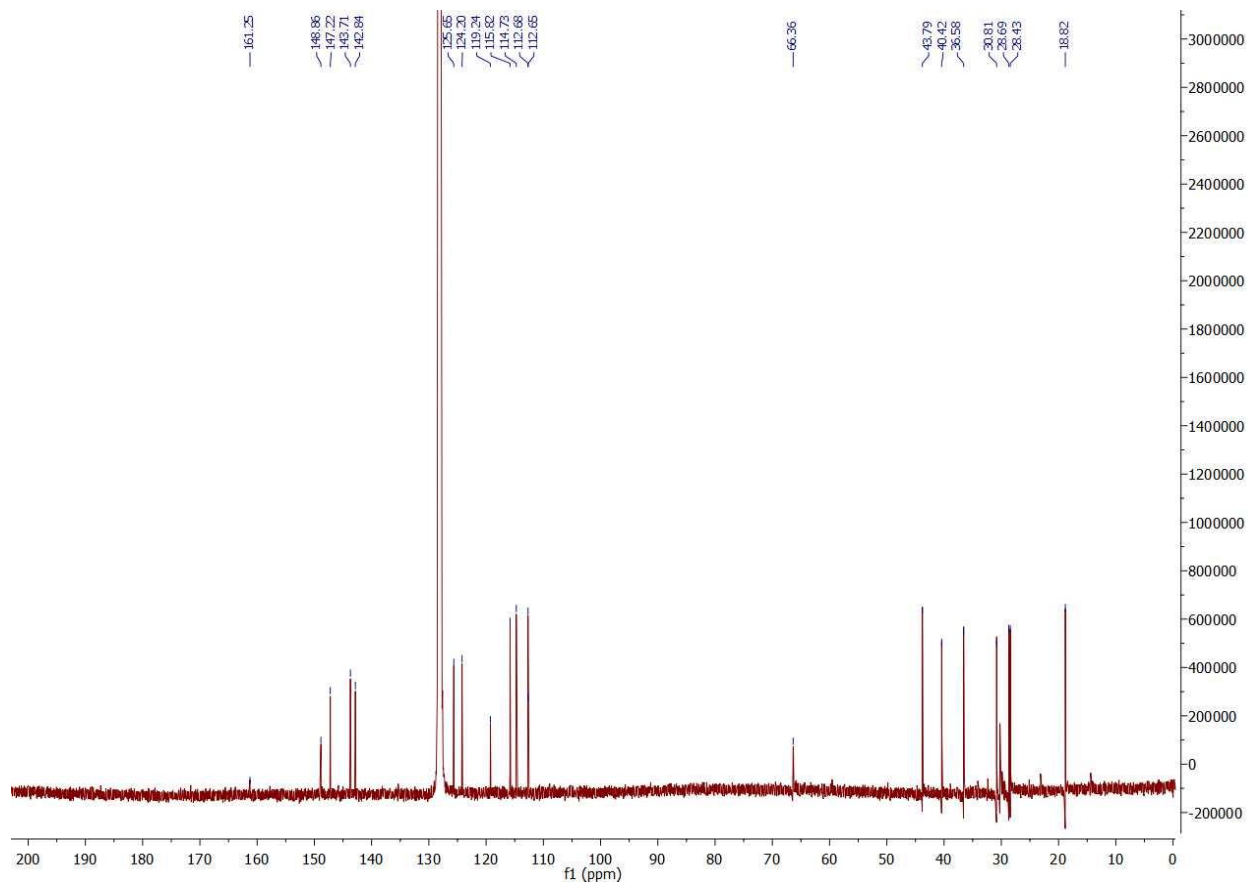

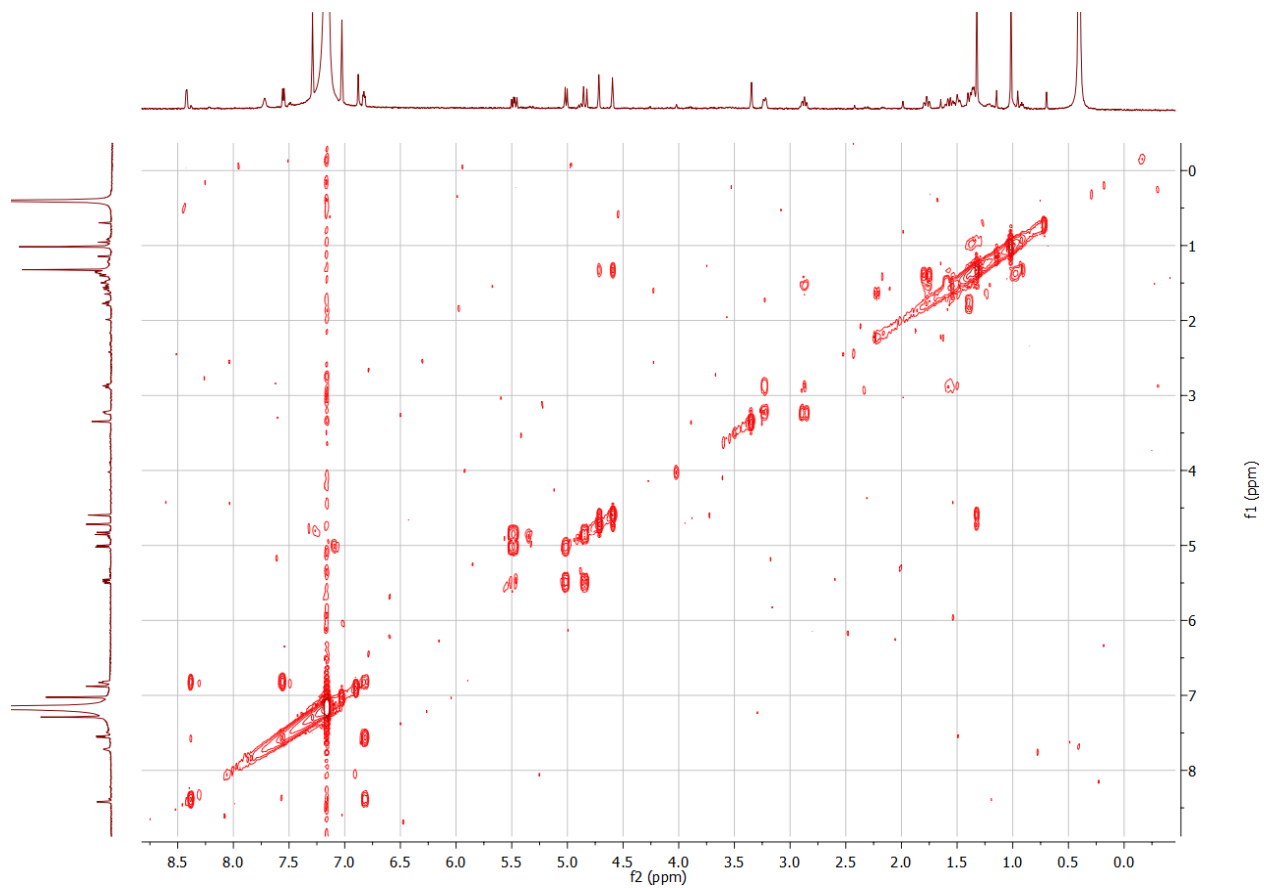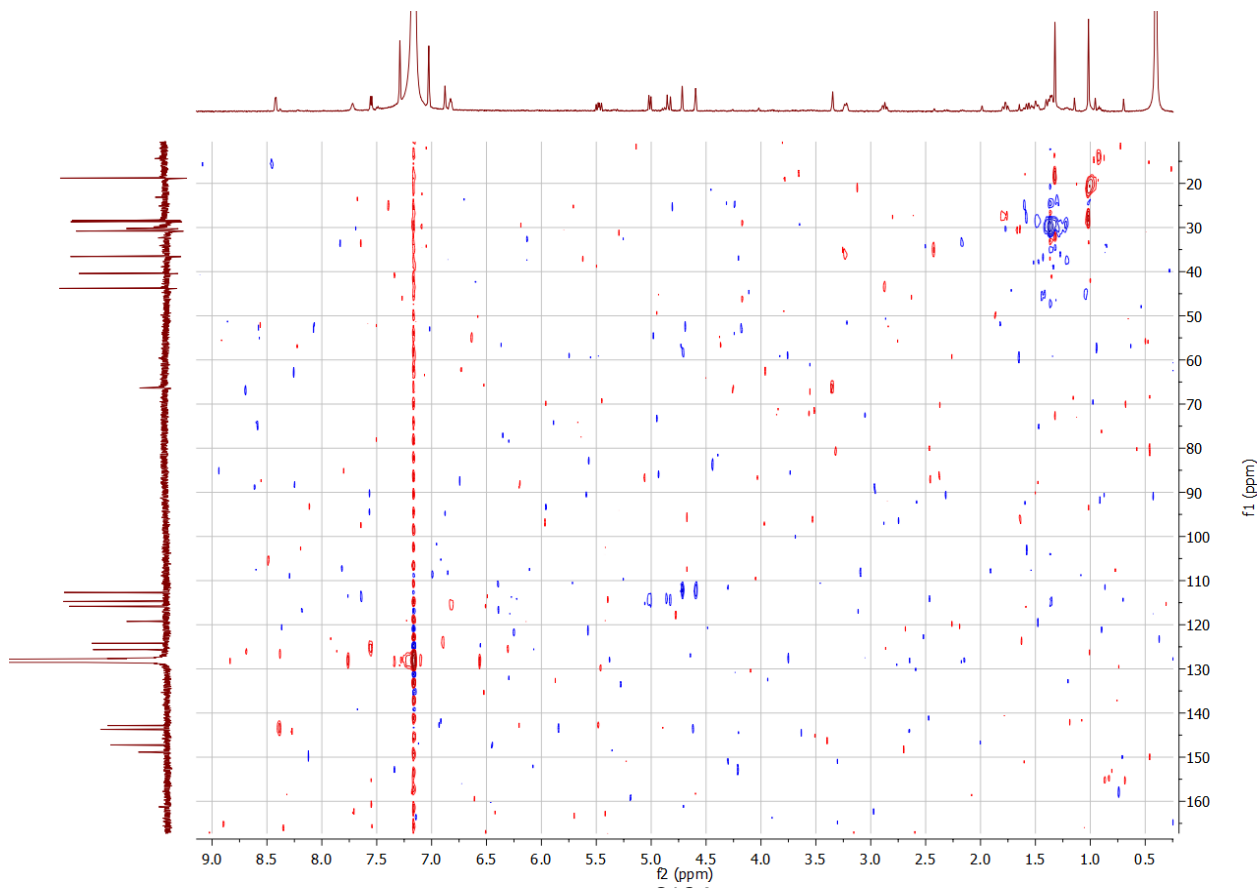

S124

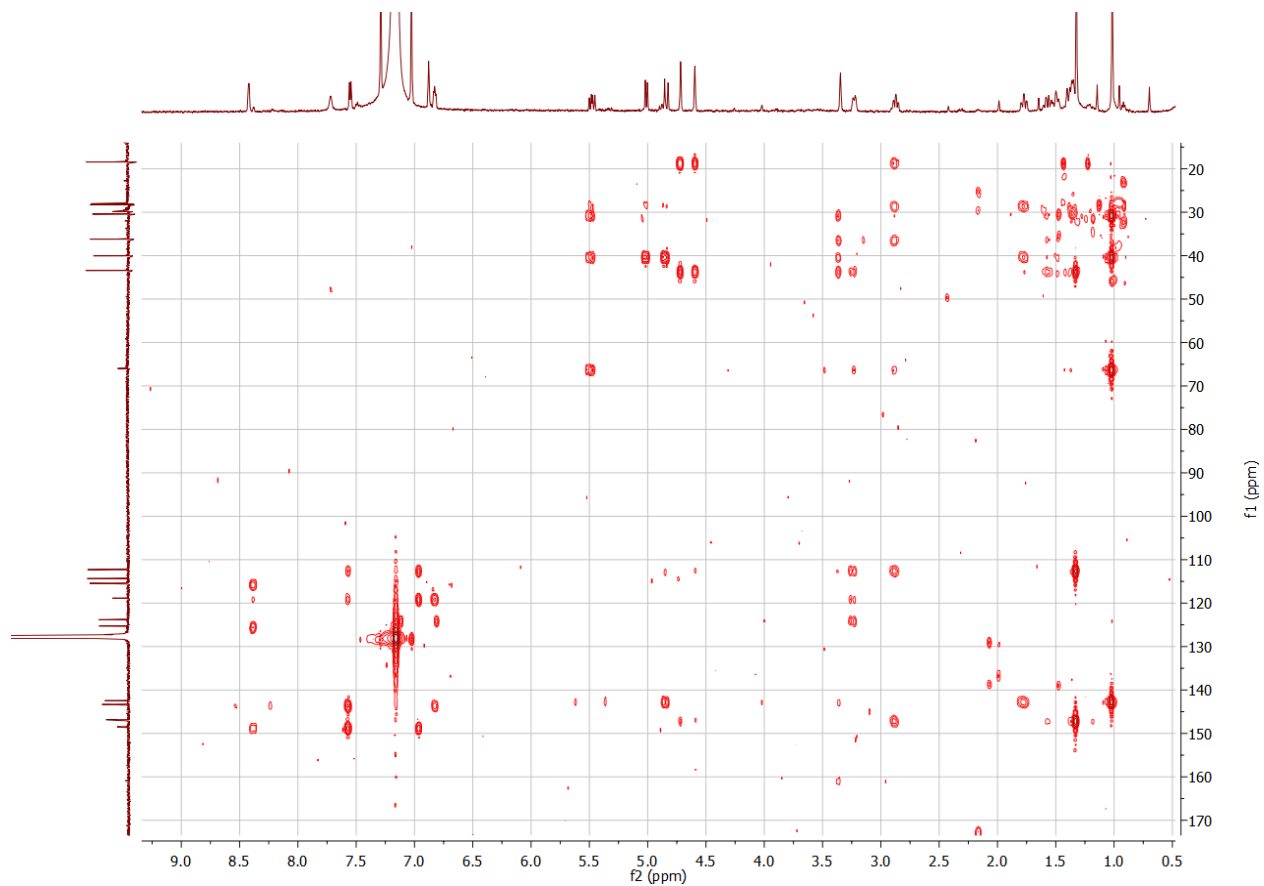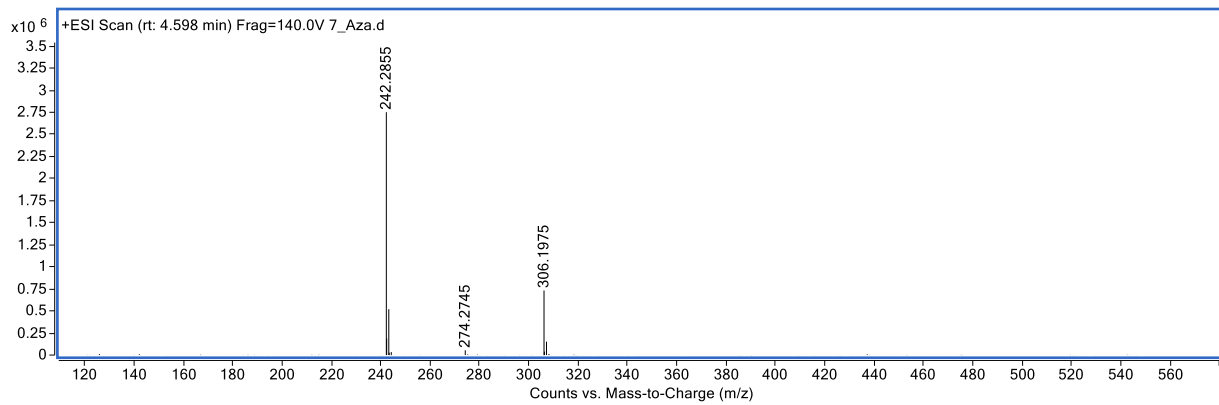

Calc.  $[\text{M}+\text{H}]^+$  306.1965 Obsv. 306.1975

$^1\text{H}$ ,  $^{13}\text{C}$ , COSY, HSQC, HMBC NMR spectra and HRMS of 5-Fluoro-7-Aza-12-*epi*-Hapalindole C (**32**) in  $\text{C}_6\text{D}_6$  at 800 MHz and 201 MHz respectively.

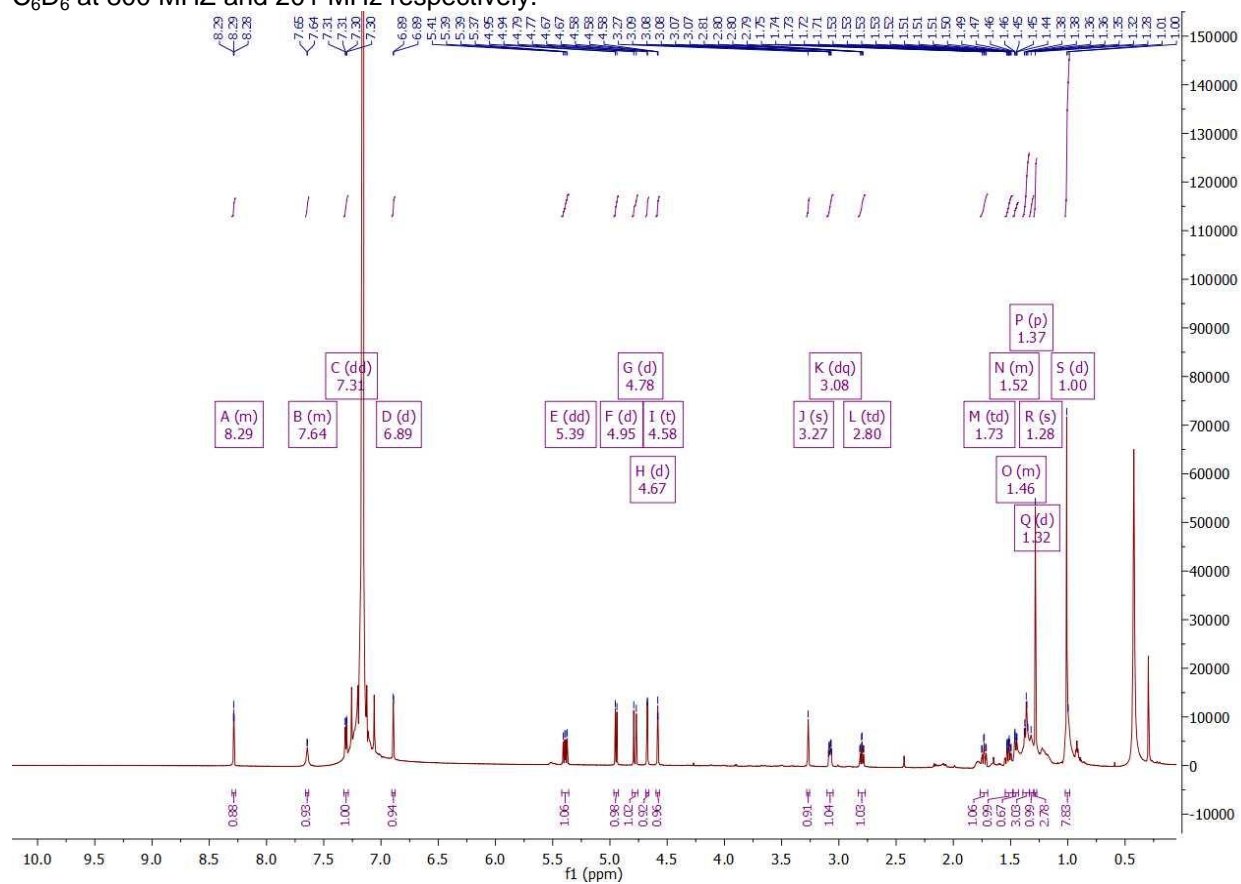

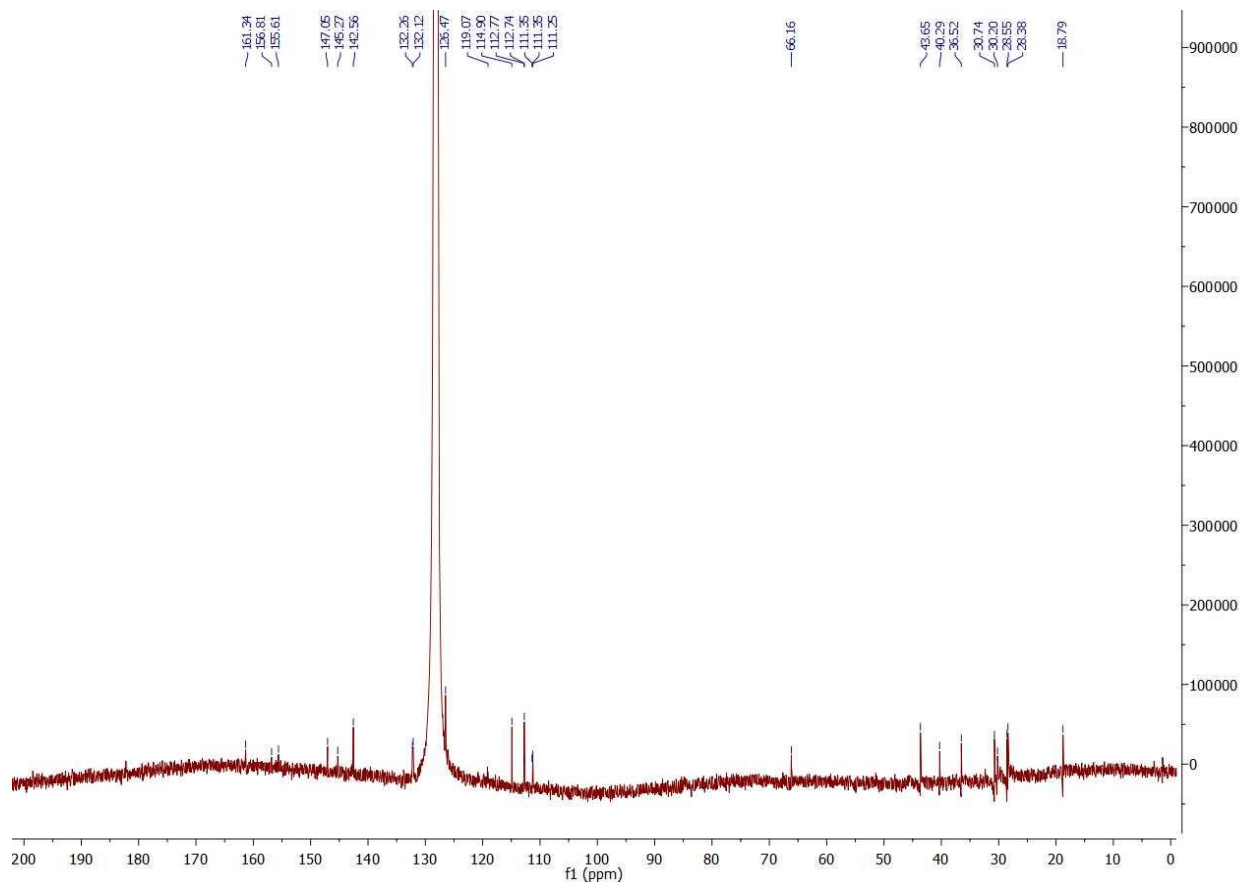

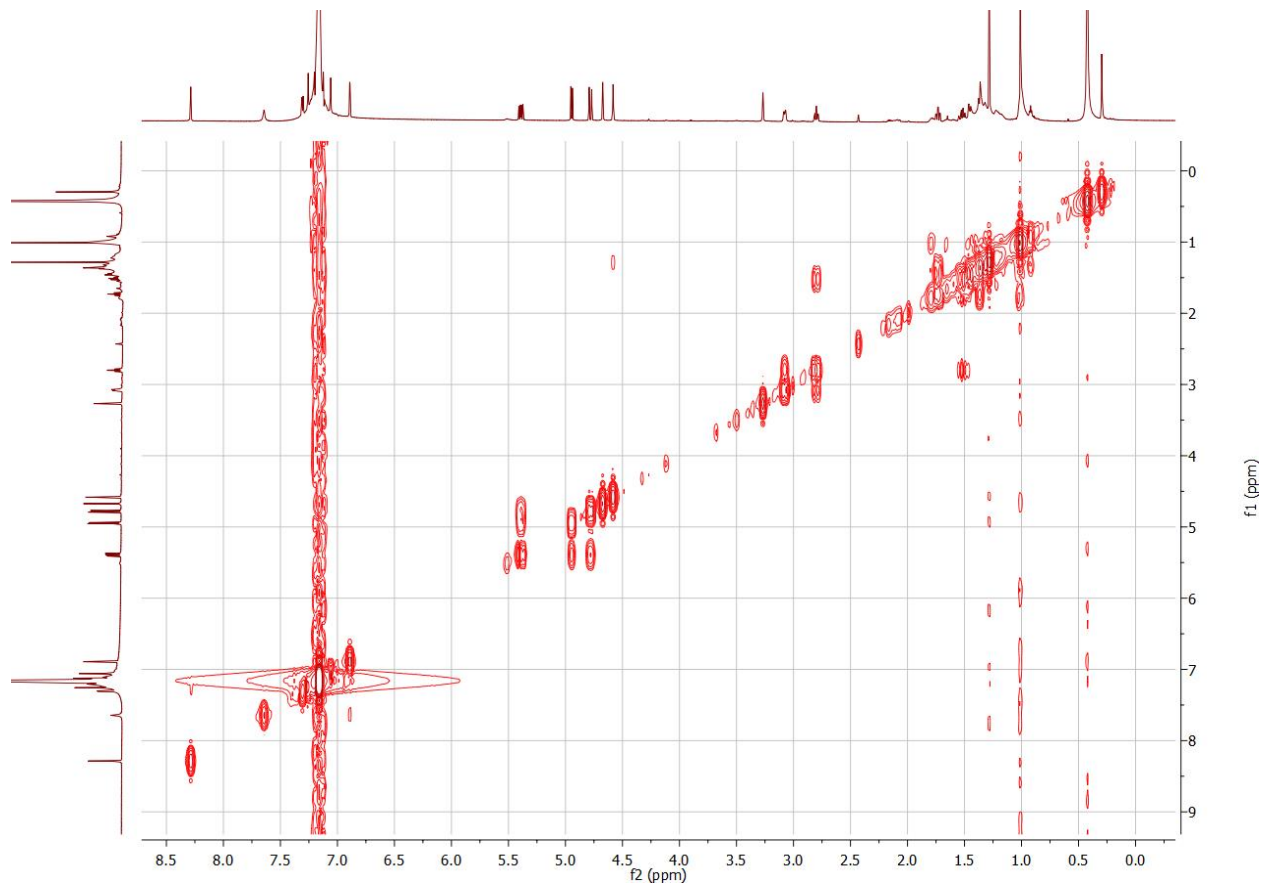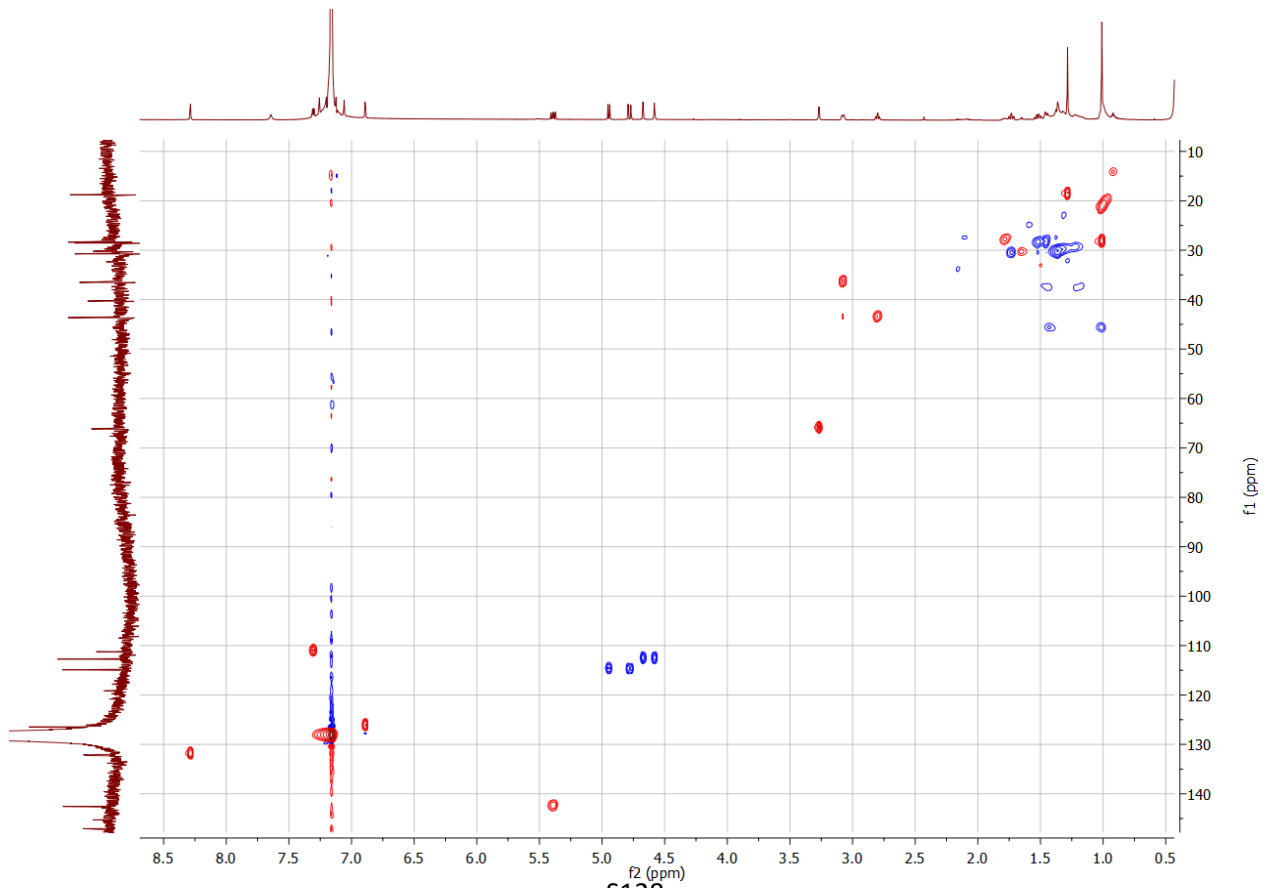

S128



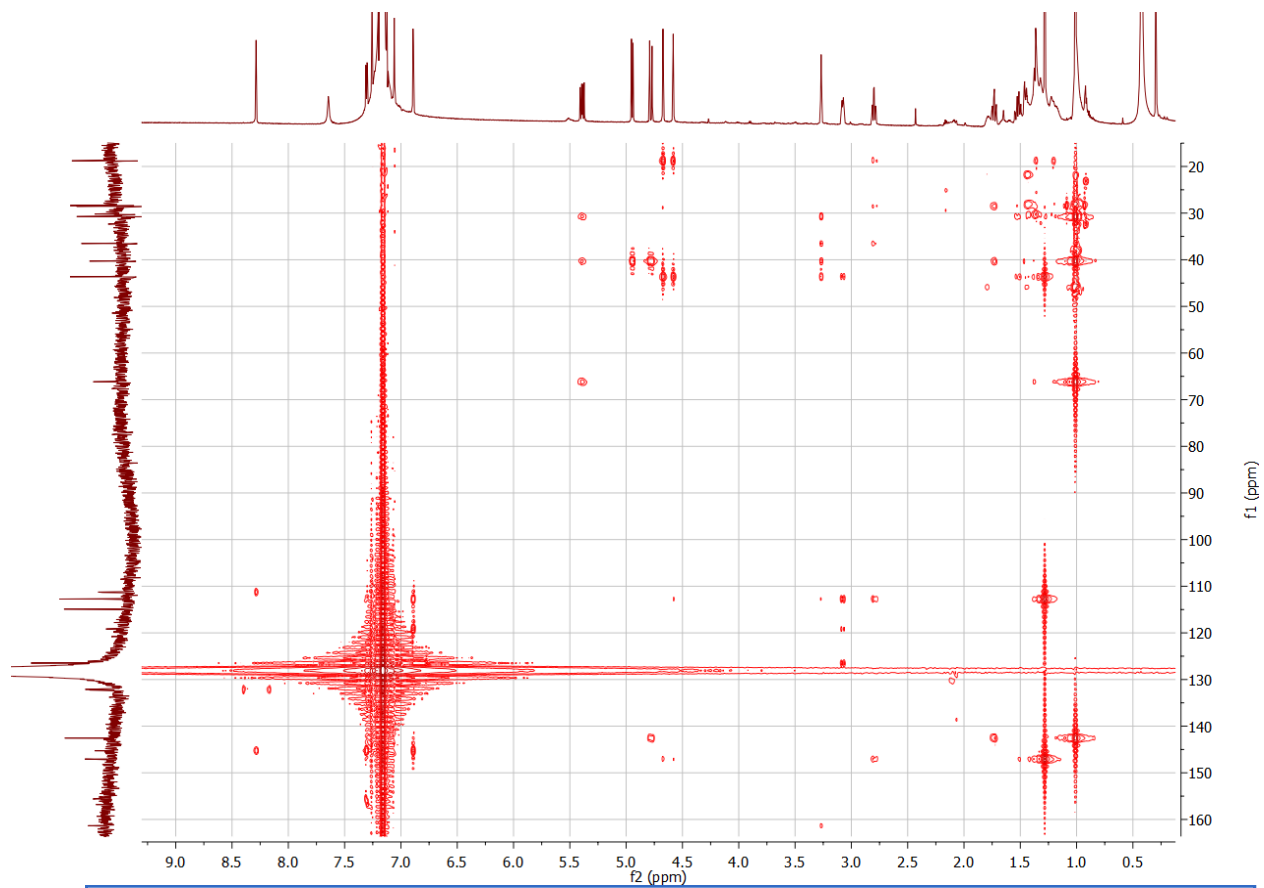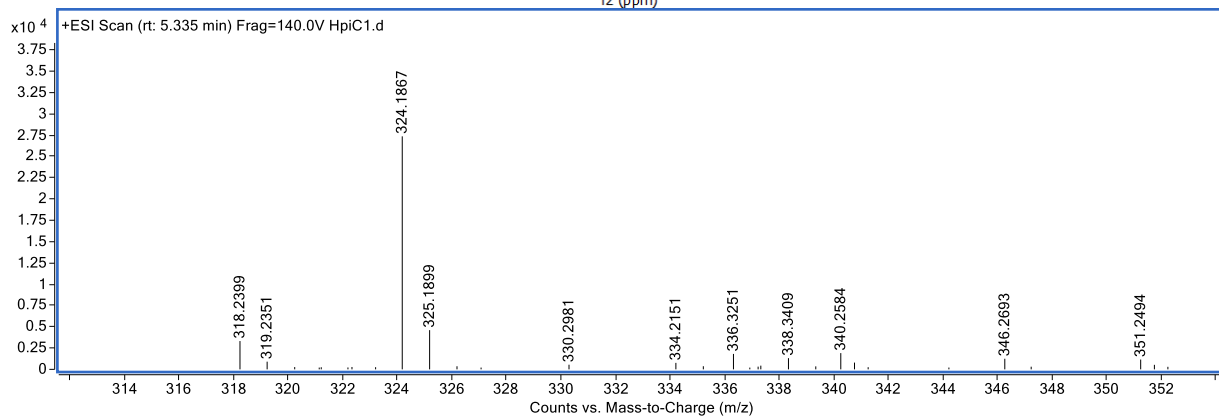

Calc.  $[M+H]^+$  324.1871 Obsv. 324.1867

**Table S38.** Crystal data and structure refinement for **36**.

|                                   |                                                                                                                  |
|-----------------------------------|------------------------------------------------------------------------------------------------------------------|
| Identification code               | rh7a2a                                                                                                           |
| Empirical formula                 | C <sub>44</sub> H <sub>56</sub> N <sub>6</sub> O                                                                 |
| Formula weight                    | 684.94                                                                                                           |
| Temperature                       | 85(2) K                                                                                                          |
| Wavelength                        | 1.54184 Å                                                                                                        |
| Crystal system, space group       | Orthorhombic, P2(1)2(1)2(1)                                                                                      |
| Unit cell dimensions              | a = 11.3688(9) Å    alpha = 90 deg.<br>b = 15.8213(4) Å    beta = 90 deg.<br>c = 22.0726(9) Å    gamma = 90 deg. |
| Volume                            | 3970.2(4) Å <sup>3</sup>                                                                                         |
| Z, Calculated density             | 4, 1.146 Mg/m <sup>3</sup>                                                                                       |
| Absorption coefficient            | 0.537 mm <sup>-1</sup>                                                                                           |
| F(000)                            | 1480                                                                                                             |
| Crystal size                      | 0.060 x 0.040 x 0.020 mm                                                                                         |
| Theta range for data collection   | 3.437 to 69.917 deg.                                                                                             |
| Limiting indices                  | -13<=h<=13, -18<=k<=19, -26<=l<=26                                                                               |
| Reflections collected / unique    | 61153 / 7384 [R(int) = 0.1104]                                                                                   |
| Completeness to theta = 67.684    | 100.0 %                                                                                                          |
| Absorption correction             | Semi-empirical from equivalents                                                                                  |
| Max. and min. transmission        | 1.00000 and 0.54753                                                                                              |
| Refinement method                 | Full-matrix least-squares on F <sup>2</sup>                                                                      |
| Data / restraints / parameters    | 7384 / 29 / 495                                                                                                  |
| Goodness-of-fit on F <sup>2</sup> | 1.017                                                                                                            |
| Final R indices [I>2sigma(I)]     | R1 = 0.0874, wR2 = 0.2313                                                                                        |
| R indices (all data)              | R1 = 0.1088, wR2 = 0.2539                                                                                        |
| Absolute structure parameter      | 0.3(3)                                                                                                           |
| Extinction coefficient            | n/a                                                                                                              |
| Largest diff. peak and hole       | 0.374 and -0.266 e.Å <sup>-3</sup>                                                                               |

**Table S39.** Atomic coordinates ( $\times 10^4$ ) and equivalent isotropic displacement parameters ( $\text{\AA}^2 \times 10^3$ ) for **36**.  
 $U(\text{eq})$  is defined as one third of the trace of the orthogonalized  $U_{ij}$  tensor.

|        | x        | y         | z       | $U(\text{eq})$ |
|--------|----------|-----------|---------|----------------|
| O(1)   | 4102(6)  | 7390(3)   | 7568(2) | 83(2)          |
| N(1)   | 5670(5)  | 4905(3)   | 5658(2) | 54(1)          |
| N(2)   | 6763(5)  | 5834(3)   | 5014(2) | 56(1)          |
| N(3)   | 8434(6)  | 8076(3)   | 6437(3) | 65(2)          |
| N(4)   | 7024(5)  | 4592(3)   | 4055(2) | 60(1)          |
| N(5)   | 5636(6)  | 3749(3)   | 4608(2) | 57(1)          |
| N(6)   | 6323(6)  | 933(3)    | 3706(3) | 60(1)          |
| C(1)   | 5120(7)  | 4865(3)   | 6193(3) | 63(2)          |
| C(2)   | 5051(7)  | 5531(3)   | 6609(3) | 61(2)          |
| C(3)   | 5608(7)  | 6300(3)   | 6478(3) | 60(2)          |
| C(4)   | 6178(6)  | 6376(3)   | 5930(3) | 55(2)          |
| C(5)   | 6825(6)  | 7002(3)   | 5599(3) | 55(2)          |
| C(6)   | 7085(6)  | 7949(3)   | 5570(3) | 59(2)          |
| C(7)   | 7449(7)  | 8459(4)   | 6128(3) | 62(2)          |
| C(9)   | 8578(8)  | 9406(3)   | 5398(3) | 71(2)          |
| C(10)  | 8217(8)  | 8867(3)   | 4845(3) | 68(2)          |
| C(11)  | 8043(6)  | 7965(3)   | 5072(3) | 55(2)          |
| C(12)  | 7709(7)  | 7254(3)   | 4615(3) | 58(2)          |
| C(13)  | 7155(6)  | 6658(3)   | 5062(3) | 55(2)          |
| C(14)  | 9205(9)  | 7787(4)   | 6720(3) | 76(2)          |
| C(8)   | 7736(7)  | 9394(4)   | 5941(4) | 71(2)          |
| C(15)  | 6652(13) | 9854(9)   | 5679(8) | 65(4)          |
| C(16)  | 5671(13) | 9969(8)   | 5963(7) | 75(4)          |
| C(8A)  | 7736(7)  | 9394(4)   | 5941(4) | 71(2)          |
| C(15A) | 6505(18) | 9759(15)  | 5953(9) | 63(5)          |
| C(16A) | 6080(20) | 10192(10) | 5502(8) | 75(6)          |
| C(17)  | 8299(9)  | 9862(4)   | 6468(4) | 87(3)          |
| C(18)  | 6769(8)  | 7550(4)   | 4158(3) | 72(2)          |
| C(19)  | 8766(8)  | 6884(4)   | 4297(3) | 72(2)          |
| C(20)  | 6194(6)  | 5651(3)   | 5543(3) | 52(2)          |
| C(21)  | 7627(8)  | 4631(4)   | 3528(3) | 72(2)          |
| C(22)  | 7551(8)  | 4033(4)   | 3069(3) | 67(2)          |
| C(23)  | 6817(7)  | 3346(3)   | 3133(3) | 64(2)          |
| C(24)  | 6187(7)  | 3271(3)   | 3664(3) | 58(2)          |
| C(25)  | 5383(6)  | 2684(3)   | 3934(3) | 57(2)          |
| C(26)  | 4687(7)  | 1889(3)   | 3819(3) | 60(2)          |
| C(27)  | 5225(6)  | 1156(3)   | 3466(3) | 61(2)          |
| C(29)  | 4019(8)  | 166(4)    | 4129(4) | 76(2)          |
| C(30)  | 3509(7)  | 908(4)    | 4485(4) | 72(2)          |
| C(31)  | 4404(7)  | 1621(3)   | 4472(3) | 59(2)          |
| C(32)  | 4189(6)  | 2464(3)   | 4833(3) | 59(2)          |
| C(33)  | 5072(6)  | 2994(3)   | 4496(3) | 56(2)          |
| C(34)  | 6317(7)  | 3924(3)   | 4106(3) | 57(2)          |
| C(35)  | 7220(8)  | 793(4)    | 3913(4) | 71(2)          |
| C(28)  | 4368(7)  | 388(4)    | 3468(4) | 70(2)          |

|       |          |         |         |        |
|-------|----------|---------|---------|--------|
| C(36) | 3257(10) | 584(5)  | 3120(5) | 96(3)  |
| C(37) | 3121(12) | 1071(5) | 2657(5) | 105(3) |
| C(38) | 4952(9)  | -382(4) | 3173(4) | 83(2)  |
| C(39) | 2944(7)  | 2797(4) | 4747(3) | 68(2)  |
| C(40) | 4439(7)  | 2375(3) | 5508(3) | 66(2)  |
| C(41) | 5789(12) | 8274(7) | 7637(5) | 116(4) |
| C(42) | 4933(9)  | 7740(5) | 7973(4) | 87(2)  |
| C(43) | 3224(9)  | 6912(4) | 7877(4) | 81(2)  |
| C(44) | 2329(11) | 6633(5) | 7444(4) | 99(3)  |

**Table S40.** Bond lengths [Å] and angles [deg] for **36**.

|              |           |
|--------------|-----------|
| O(1)-C(42)   | 1.413(11) |
| O(1)-C(43)   | 1.426(10) |
| N(1)-C(1)    | 1.337(8)  |
| N(1)-C(20)   | 1.347(7)  |
| N(2)-C(20)   | 1.366(8)  |
| N(2)-C(13)   | 1.382(6)  |
| N(2)-H(2N)   | 0.91(3)   |
| N(3)-C(14)   | 1.171(10) |
| N(3)-C(7)    | 1.444(10) |
| N(4)-C(34)   | 1.332(8)  |
| N(4)-C(21)   | 1.352(9)  |
| N(5)-C(33)   | 1.378(7)  |
| N(5)-C(34)   | 1.381(8)  |
| N(5)-H(5N)   | 0.90(3)   |
| N(6)-C(35)   | 1.139(10) |
| N(6)-C(27)   | 1.402(10) |
| C(1)-C(2)    | 1.399(8)  |
| C(1)-H(1)    | 0.9500    |
| C(2)-C(3)    | 1.401(8)  |
| C(2)-H(2)    | 0.9500    |
| C(3)-C(4)    | 1.377(9)  |
| C(3)-H(3)    | 0.9500    |
| C(4)-C(20)   | 1.431(8)  |
| C(4)-C(5)    | 1.433(8)  |
| C(5)-C(13)   | 1.358(8)  |
| C(5)-C(6)    | 1.529(7)  |
| C(6)-C(7)    | 1.528(9)  |
| C(6)-C(11)   | 1.547(9)  |
| C(6)-H(6)    | 1.0000    |
| C(7)-C(8A)   | 1.569(8)  |
| C(7)-C(8)    | 1.569(8)  |
| C(7)-H(7)    | 1.0000    |
| C(9)-C(8A)   | 1.535(11) |
| C(9)-C(8)    | 1.535(11) |
| C(9)-C(10)   | 1.543(9)  |
| C(9)-H(9A)   | 0.9900    |
| C(9)-H(9B)   | 0.9900    |
| C(10)-C(11)  | 1.525(7)  |
| C(10)-H(10A) | 0.9900    |
| C(10)-H(10B) | 0.9900    |
| C(11)-C(12)  | 1.559(8)  |
| C(11)-H(11)  | 1.0000    |

|               |           |
|---------------|-----------|
| C(12)-C(13)   | 1.503(8)  |
| C(12)-C(19)   | 1.510(11) |
| C(12)-C(18)   | 1.542(10) |
| C(8)-C(17)    | 1.519(11) |
| C(8)-C(15)    | 1.544(15) |
| C(15)-C(16)   | 1.293(16) |
| C(15)-H(15)   | 0.9500    |
| C(16)-H(16A)  | 0.9500    |
| C(16)-H(16B)  | 0.9500    |
| C(8A)-C(15A)  | 1.515(19) |
| C(8A)-C(17)   | 1.519(11) |
| C(15A)-C(16A) | 1.302(19) |
| C(15A)-H(15A) | 0.9500    |
| C(16A)-H(16C) | 0.9500    |
| C(16A)-H(16D) | 0.9500    |
| C(17)-H(17A)  | 0.9800    |
| C(17)-H(17B)  | 0.9800    |
| C(17)-H(17C)  | 0.9800    |
| C(18)-H(18A)  | 0.9800    |
| C(18)-H(18B)  | 0.9800    |
| C(18)-H(18C)  | 0.9800    |
| C(19)-H(19A)  | 0.9800    |
| C(19)-H(19B)  | 0.9800    |
| C(19)-H(19C)  | 0.9800    |
| C(21)-C(22)   | 1.389(9)  |
| C(21)-H(21)   | 0.9500    |
| C(22)-C(23)   | 1.377(9)  |
| C(22)-H(22)   | 0.9500    |
| C(23)-C(24)   | 1.379(9)  |
| C(23)-H(23)   | 0.9500    |
| C(24)-C(34)   | 1.428(7)  |
| C(24)-C(25)   | 1.434(9)  |
| C(25)-C(33)   | 1.381(8)  |
| C(25)-C(26)   | 1.507(8)  |
| C(26)-C(27)   | 1.524(8)  |
| C(26)-C(31)   | 1.538(9)  |
| C(26)-H(26)   | 1.0000    |
| C(27)-C(28)   | 1.557(9)  |
| C(27)-H(27)   | 1.0000    |
| C(29)-C(30)   | 1.526(9)  |
| C(29)-C(28)   | 1.552(11) |
| C(29)-H(29A)  | 0.9900    |
| C(29)-H(29B)  | 0.9900    |
| C(30)-C(31)   | 1.519(9)  |
| C(30)-H(30A)  | 0.9900    |
| C(30)-H(30B)  | 0.9900    |
| C(31)-C(32)   | 1.572(7)  |
| C(31)-H(31)   | 1.0000    |
| C(32)-C(33)   | 1.505(9)  |
| C(32)-C(39)   | 1.523(10) |
| C(32)-C(40)   | 1.523(10) |
| C(28)-C(36)   | 1.511(12) |
| C(28)-C(38)   | 1.533(9)  |
| C(36)-C(37)   | 1.289(13) |
| C(36)-H(36)   | 0.9500    |
| C(37)-H(37A)  | 0.9500    |

|                  |           |
|------------------|-----------|
| C(37)-H(37B)     | 0.9500    |
| C(38)-H(38A)     | 0.9800    |
| C(38)-H(38B)     | 0.9800    |
| C(38)-H(38C)     | 0.9800    |
| C(39)-H(39A)     | 0.9800    |
| C(39)-H(39B)     | 0.9800    |
| C(39)-H(39C)     | 0.9800    |
| C(40)-H(40A)     | 0.9800    |
| C(40)-H(40B)     | 0.9800    |
| C(40)-H(40C)     | 0.9800    |
| C(41)-C(42)      | 1.488(14) |
| C(41)-H(41A)     | 0.9800    |
| C(41)-H(41B)     | 0.9800    |
| C(41)-H(41C)     | 0.9800    |
| C(42)-H(42A)     | 0.9900    |
| C(42)-H(42B)     | 0.9900    |
| C(43)-C(44)      | 1.464(13) |
| C(43)-H(43A)     | 0.9900    |
| C(43)-H(43B)     | 0.9900    |
| C(44)-H(44A)     | 0.9800    |
| C(44)-H(44B)     | 0.9800    |
| C(44)-H(44C)     | 0.9800    |
|                  |           |
| C(42)-O(1)-C(43) | 111.9(6)  |
| C(1)-N(1)-C(20)  | 114.5(5)  |
| C(20)-N(2)-C(13) | 106.6(5)  |
| C(20)-N(2)-H(2N) | 128(7)    |
| C(13)-N(2)-H(2N) | 126(7)    |
| C(14)-N(3)-C(7)  | 175.8(7)  |
| C(34)-N(4)-C(21) | 114.5(5)  |
| C(33)-N(5)-C(34) | 106.9(5)  |
| C(33)-N(5)-H(5N) | 118(4)    |
| C(34)-N(5)-H(5N) | 135(4)    |
| C(35)-N(6)-C(27) | 176.4(6)  |
| N(1)-C(1)-C(2)   | 124.8(6)  |
| N(1)-C(1)-H(1)   | 117.6     |
| C(2)-C(1)-H(1)   | 117.6     |
| C(1)-C(2)-C(3)   | 119.6(6)  |
| C(1)-C(2)-H(2)   | 120.2     |
| C(3)-C(2)-H(2)   | 120.2     |
| C(4)-C(3)-C(2)   | 118.0(5)  |
| C(4)-C(3)-H(3)   | 121.0     |
| C(2)-C(3)-H(3)   | 121.0     |
| C(3)-C(4)-C(20)  | 117.4(5)  |
| C(3)-C(4)-C(5)   | 138.5(5)  |
| C(20)-C(4)-C(5)  | 104.1(5)  |
| C(13)-C(5)-C(4)  | 108.1(4)  |
| C(13)-C(5)-C(6)  | 107.6(5)  |
| C(4)-C(5)-C(6)   | 142.9(6)  |
| C(5)-C(6)-C(7)   | 122.4(5)  |
| C(5)-C(6)-C(11)  | 100.5(5)  |
| C(7)-C(6)-C(11)  | 111.9(5)  |
| C(5)-C(6)-H(6)   | 107.0     |
| C(7)-C(6)-H(6)   | 107.0     |
| C(11)-C(6)-H(6)  | 107.0     |
| N(3)-C(7)-C(6)   | 111.6(5)  |

|                      |           |
|----------------------|-----------|
| N(3)-C(7)-C(8A)      | 111.0(6)  |
| C(6)-C(7)-C(8A)      | 110.1(6)  |
| N(3)-C(7)-C(8)       | 111.0(6)  |
| C(6)-C(7)-C(8)       | 110.1(6)  |
| N(3)-C(7)-H(7)       | 108.0     |
| C(6)-C(7)-H(7)       | 108.0     |
| C(8)-C(7)-H(7)       | 108.0     |
| C(8A)-C(9)-C(10)     | 116.4(6)  |
| C(8)-C(9)-C(10)      | 116.4(6)  |
| C(8)-C(9)-H(9A)      | 108.2     |
| C(10)-C(9)-H(9A)     | 108.2     |
| C(8)-C(9)-H(9B)      | 108.2     |
| C(10)-C(9)-H(9B)     | 108.2     |
| H(9A)-C(9)-H(9B)     | 107.3     |
| C(11)-C(10)-C(9)     | 107.0(5)  |
| C(11)-C(10)-H(10A)   | 110.3     |
| C(9)-C(10)-H(10A)    | 110.3     |
| C(11)-C(10)-H(10B)   | 110.3     |
| C(9)-C(10)-H(10B)    | 110.3     |
| H(10A)-C(10)-H(10B)  | 108.6     |
| C(10)-C(11)-C(6)     | 109.9(5)  |
| C(10)-C(11)-C(12)    | 119.6(5)  |
| C(6)-C(11)-C(12)     | 106.1(5)  |
| C(10)-C(11)-H(11)    | 106.9     |
| C(6)-C(11)-H(11)     | 106.9     |
| C(12)-C(11)-H(11)    | 106.9     |
| C(13)-C(12)-C(19)    | 113.3(5)  |
| C(13)-C(12)-C(18)    | 109.3(6)  |
| C(19)-C(12)-C(18)    | 111.4(6)  |
| C(13)-C(12)-C(11)    | 97.4(5)   |
| C(19)-C(12)-C(11)    | 112.7(6)  |
| C(18)-C(12)-C(11)    | 111.9(5)  |
| C(5)-C(13)-N(2)      | 110.9(5)  |
| C(5)-C(13)-C(12)     | 116.0(4)  |
| N(2)-C(13)-C(12)     | 132.5(5)  |
| C(17)-C(8)-C(9)      | 109.2(7)  |
| C(17)-C(8)-C(15)     | 113.1(7)  |
| C(9)-C(8)-C(15)      | 101.5(8)  |
| C(17)-C(8)-C(7)      | 110.3(6)  |
| C(9)-C(8)-C(7)       | 110.3(5)  |
| C(15)-C(8)-C(7)      | 112.1(8)  |
| C(16)-C(15)-C(8)     | 124.9(15) |
| C(16)-C(15)-H(15)    | 117.5     |
| C(8)-C(15)-H(15)     | 117.5     |
| C(15)-C(16)-H(16A)   | 120.0     |
| C(15)-C(16)-H(16B)   | 120.0     |
| H(16A)-C(16)-H(16B)  | 120.0     |
| C(15A)-C(8A)-C(17)   | 101.0(11) |
| C(15A)-C(8A)-C(9)    | 125.8(10) |
| C(17)-C(8A)-C(9)     | 109.2(7)  |
| C(15A)-C(8A)-C(7)    | 99.4(11)  |
| C(17)-C(8A)-C(7)     | 110.3(6)  |
| C(9)-C(8A)-C(7)      | 110.3(5)  |
| C(16A)-C(15A)-C(8A)  | 122.3(19) |
| C(16A)-C(15A)-H(15A) | 118.9     |
| C(8A)-C(15A)-H(15A)  | 118.9     |

|                      |          |
|----------------------|----------|
| C(15A)-C(16A)-H(16C) | 120.0    |
| C(15A)-C(16A)-H(16D) | 120.0    |
| H(16C)-C(16A)-H(16D) | 120.0    |
| C(8)-C(17)-H(17A)    | 109.5    |
| C(8)-C(17)-H(17B)    | 109.5    |
| H(17A)-C(17)-H(17B)  | 109.5    |
| C(8)-C(17)-H(17C)    | 109.5    |
| H(17A)-C(17)-H(17C)  | 109.5    |
| H(17B)-C(17)-H(17C)  | 109.5    |
| C(12)-C(18)-H(18A)   | 109.5    |
| C(12)-C(18)-H(18B)   | 109.5    |
| H(18A)-C(18)-H(18B)  | 109.5    |
| C(12)-C(18)-H(18C)   | 109.5    |
| H(18A)-C(18)-H(18C)  | 109.5    |
| H(18B)-C(18)-H(18C)  | 109.5    |
| C(12)-C(19)-H(19A)   | 109.5    |
| C(12)-C(19)-H(19B)   | 109.5    |
| H(19A)-C(19)-H(19B)  | 109.5    |
| C(12)-C(19)-H(19C)   | 109.5    |
| H(19A)-C(19)-H(19C)  | 109.5    |
| H(19B)-C(19)-H(19C)  | 109.5    |
| N(1)-C(20)-N(2)      | 123.8(5) |
| N(1)-C(20)-C(4)      | 125.8(6) |
| N(2)-C(20)-C(4)      | 110.3(5) |
| N(4)-C(21)-C(22)     | 124.4(6) |
| N(4)-C(21)-H(21)     | 117.8    |
| C(22)-C(21)-H(21)    | 117.8    |
| C(23)-C(22)-C(21)    | 120.1(6) |
| C(23)-C(22)-H(22)    | 120.0    |
| C(21)-C(22)-H(22)    | 120.0    |
| C(22)-C(23)-C(24)    | 118.0(5) |
| C(22)-C(23)-H(23)    | 121.0    |
| C(24)-C(23)-H(23)    | 121.0    |
| C(23)-C(24)-C(34)    | 117.7(6) |
| C(23)-C(24)-C(25)    | 137.8(5) |
| C(34)-C(24)-C(25)    | 104.5(5) |
| C(33)-C(25)-C(24)    | 107.8(5) |
| C(33)-C(25)-C(26)    | 108.3(5) |
| C(24)-C(25)-C(26)    | 143.7(5) |
| C(25)-C(26)-C(27)    | 120.7(6) |
| C(25)-C(26)-C(31)    | 100.5(5) |
| C(27)-C(26)-C(31)    | 110.7(5) |
| C(25)-C(26)-H(26)    | 108.1    |
| C(27)-C(26)-H(26)    | 108.1    |
| C(31)-C(26)-H(26)    | 108.1    |
| N(6)-C(27)-C(26)     | 110.8(5) |
| N(6)-C(27)-C(28)     | 111.1(5) |
| C(26)-C(27)-C(28)    | 109.9(5) |
| N(6)-C(27)-H(27)     | 108.3    |
| C(26)-C(27)-H(27)    | 108.3    |
| C(28)-C(27)-H(27)    | 108.3    |
| C(30)-C(29)-C(28)    | 114.0(6) |
| C(30)-C(29)-H(29A)   | 108.7    |
| C(28)-C(29)-H(29A)   | 108.7    |
| C(30)-C(29)-H(29B)   | 108.7    |
| C(28)-C(29)-H(29B)   | 108.7    |



|                     |           |
|---------------------|-----------|
| H(29A)-C(29)-H(29B) | 107.6     |
| C(31)-C(30)-C(29)   | 107.9(6)  |
| C(31)-C(30)-H(30A)  | 110.1     |
| C(29)-C(30)-H(30A)  | 110.1     |
| C(31)-C(30)-H(30B)  | 110.1     |
| C(29)-C(30)-H(30B)  | 110.1     |
| H(30A)-C(30)-H(30B) | 108.4     |
| C(30)-C(31)-C(26)   | 111.3(5)  |
| C(30)-C(31)-C(32)   | 121.1(6)  |
| C(26)-C(31)-C(32)   | 105.9(4)  |
| C(30)-C(31)-H(31)   | 105.9     |
| C(26)-C(31)-H(31)   | 105.9     |
| C(32)-C(31)-H(31)   | 105.9     |
| C(33)-C(32)-C(39)   | 111.4(5)  |
| C(33)-C(32)-C(40)   | 114.3(6)  |
| C(39)-C(32)-C(40)   | 109.1(6)  |
| C(33)-C(32)-C(31)   | 96.9(5)   |
| C(39)-C(32)-C(31)   | 112.0(5)  |
| C(40)-C(32)-C(31)   | 112.8(5)  |
| N(5)-C(33)-C(25)    | 110.5(5)  |
| N(5)-C(33)-C(32)    | 134.8(5)  |
| C(25)-C(33)-C(32)   | 114.6(5)  |
| N(4)-C(34)-N(5)     | 124.4(5)  |
| N(4)-C(34)-C(24)    | 125.4(6)  |
| N(5)-C(34)-C(24)    | 110.2(5)  |
| C(36)-C(28)-C(38)   | 107.9(6)  |
| C(36)-C(28)-C(29)   | 108.1(7)  |
| C(38)-C(28)-C(29)   | 109.4(6)  |
| C(36)-C(28)-C(27)   | 111.1(6)  |
| C(38)-C(28)-C(27)   | 110.3(6)  |
| C(29)-C(28)-C(27)   | 109.9(5)  |
| C(37)-C(36)-C(28)   | 128.8(11) |
| C(37)-C(36)-H(36)   | 115.6     |
| C(28)-C(36)-H(36)   | 115.6     |
| C(36)-C(37)-H(37A)  | 120.0     |
| C(36)-C(37)-H(37B)  | 120.0     |
| H(37A)-C(37)-H(37B) | 120.0     |
| C(28)-C(38)-H(38A)  | 109.5     |
| C(28)-C(38)-H(38B)  | 109.5     |
| H(38A)-C(38)-H(38B) | 109.5     |
| C(28)-C(38)-H(38C)  | 109.5     |
| H(38A)-C(38)-H(38C) | 109.5     |
| H(38B)-C(38)-H(38C) | 109.5     |
| C(32)-C(39)-H(39A)  | 109.5     |
| C(32)-C(39)-H(39B)  | 109.5     |
| H(39A)-C(39)-H(39B) | 109.5     |
| C(32)-C(39)-H(39C)  | 109.5     |
| H(39A)-C(39)-H(39C) | 109.5     |
| H(39B)-C(39)-H(39C) | 109.5     |
| C(32)-C(40)-H(40A)  | 109.5     |
| C(32)-C(40)-H(40B)  | 109.5     |
| H(40A)-C(40)-H(40B) | 109.5     |
| C(32)-C(40)-H(40C)  | 109.5     |
| H(40A)-C(40)-H(40C) | 109.5     |
| H(40B)-C(40)-H(40C) | 109.5     |
| C(42)-C(41)-H(41A)  | 109.5     |

|                     |          |
|---------------------|----------|
| C(42)-C(41)-H(41B)  | 109.5    |
| H(41A)-C(41)-H(41B) | 109.5    |
| C(42)-C(41)-H(41C)  | 109.5    |
| H(41A)-C(41)-H(41C) | 109.5    |
| H(41B)-C(41)-H(41C) | 109.5    |
| O(1)-C(42)-C(41)    | 110.2(8) |
| O(1)-C(42)-H(42A)   | 109.6    |
| C(41)-C(42)-H(42A)  | 109.6    |
| O(1)-C(42)-H(42B)   | 109.6    |
| C(41)-C(42)-H(42B)  | 109.6    |
| H(42A)-C(42)-H(42B) | 108.1    |
| O(1)-C(43)-C(44)    | 109.6(7) |
| O(1)-C(43)-H(43A)   | 109.8    |
| C(44)-C(43)-H(43A)  | 109.8    |
| O(1)-C(43)-H(43B)   | 109.8    |
| C(44)-C(43)-H(43B)  | 109.8    |
| H(43A)-C(43)-H(43B) | 108.2    |
| C(43)-C(44)-H(44A)  | 109.5    |
| C(43)-C(44)-H(44B)  | 109.5    |
| H(44A)-C(44)-H(44B) | 109.5    |
| C(43)-C(44)-H(44C)  | 109.5    |
| H(44A)-C(44)-H(44C) | 109.5    |
| H(44B)-C(44)-H(44C) | 109.5    |

Symmetry transformations used to generate equivalent atoms:

**Table S41.** Anisotropic displacement parameters ( $\text{\AA}^2 \times 10^3$ ) for **36**.

The anisotropic displacement factor exponent takes the form:

$$-2 \pi^2 [ h^2 a^2 U_{11} + \dots + 2 h k a^* b^* U_{12} ]$$

|       | U11    | U22   | U33   | U23    | U13    | U12    |
|-------|--------|-------|-------|--------|--------|--------|
| O(1)  | 142(5) | 42(2) | 64(3) | -12(2) | 4(3)   | -4(3)  |
| N(1)  | 92(4)  | 20(2) | 50(3) | 1(2)   | -1(2)  | -5(2)  |
| N(2)  | 97(4)  | 19(2) | 51(3) | 0(2)   | 0(3)   | -5(2)  |
| N(3)  | 103(5) | 31(2) | 60(3) | -9(2)  | 3(3)   | -9(3)  |
| N(4)  | 102(4) | 23(2) | 55(3) | 0(2)   | 3(3)   | -3(2)  |
| N(5)  | 99(4)  | 22(2) | 49(3) | -4(2)  | -1(3)  | 0(2)   |
| N(6)  | 59(4)  | 30(2) | 90(4) | -22(2) | 11(3)  | -2(2)  |
| C(1)  | 117(6) | 25(2) | 47(3) | 2(2)   | -2(3)  | 0(3)   |
| C(2)  | 106(5) | 27(2) | 50(3) | 2(2)   | 4(3)   | -4(3)  |
| C(3)  | 100(5) | 26(2) | 54(3) | -5(2)  | -3(3)  | 0(3)   |
| C(4)  | 84(4)  | 26(2) | 54(3) | -1(2)  | -2(3)  | 1(3)   |
| C(5)  | 92(5)  | 17(2) | 55(3) | -3(2)  | -1(3)  | -6(2)  |
| C(6)  | 87(5)  | 21(2) | 70(4) | -3(2)  | 0(3)   | -8(3)  |
| C(7)  | 80(5)  | 28(3) | 76(4) | -12(3) | 2(4)   | -4(3)  |
| C(9)  | 110(6) | 23(2) | 78(4) | -1(3)  | -17(4) | -9(3)  |
| C(10) | 110(6) | 21(2) | 73(4) | 2(2)   | -3(4)  | -9(3)  |
| C(11) | 80(4)  | 22(2) | 62(3) | 1(2)   | 1(3)   | -7(2)  |
| C(12) | 93(5)  | 24(2) | 57(3) | 3(2)   | 2(3)   | -8(3)  |
| C(13) | 93(5)  | 19(2) | 54(3) | 1(2)   | -1(3)  | -7(2)  |
| C(14) | 132(7) | 41(3) | 57(4) | -3(3)  | -2(4)  | -10(4) |

|        |         |        |        |        |        |        |
|--------|---------|--------|--------|--------|--------|--------|
| C(8)   | 101(5)  | 26(3)  | 87(5)  | -9(3)  | -4(4)  | -4(3)  |
| C(15)  | 99(8)   | 27(6)  | 70(10) | -6(7)  | -6(7)  | 9(6)   |
| C(16)  | 99(9)   | 45(6)  | 82(9)  | 10(5)  | -4(7)  | 9(6)   |
| C(8A)  | 101(5)  | 26(3)  | 87(5)  | -9(3)  | -4(4)  | -4(3)  |
| C(15A) | 91(12)  | 50(11) | 49(11) | -7(9)  | 11(9)  | -1(9)  |
| C(16A) | 123(16) | 30(8)  | 74(11) | -1(7)  | 10(10) | 8(9)   |
| C(17)  | 138(7)  | 31(3)  | 93(5)  | -21(3) | 1(5)   | -13(4) |
| C(18)  | 115(6)  | 35(3)  | 65(4)  | 9(3)   | -14(4) | -12(3) |
| C(19)  | 112(6)  | 34(3)  | 70(4)  | -10(3) | 12(4)  | -11(3) |
| C(20)  | 85(4)   | 21(2)  | 51(3)  | 3(2)   | -5(3)  | -1(2)  |
| C(21)  | 144(7)  | 28(2)  | 44(3)  | 0(2)   | 6(4)   | -6(3)  |
| C(22)  | 117(6)  | 32(3)  | 53(3)  | 4(2)   | 6(4)   | -5(3)  |
| C(23)  | 121(6)  | 29(3)  | 43(3)  | 0(2)   | 1(3)   | 1(3)   |
| C(24)  | 101(5)  | 23(2)  | 50(3)  | -4(2)  | -5(3)  | 1(3)   |
| C(25)  | 93(5)   | 26(2)  | 52(3)  | -3(2)  | -1(3)  | -6(3)  |
| C(26)  | 92(5)   | 28(2)  | 61(3)  | -14(2) | 0(3)   | 0(3)   |
| C(27)  | 81(5)   | 31(3)  | 71(4)  | -19(3) | 10(3)  | -4(3)  |
| C(29)  | 108(6)  | 36(3)  | 85(5)  | -16(3) | 14(4)  | -16(3) |
| C(30)  | 100(6)  | 35(3)  | 82(5)  | -17(3) | 15(4)  | -10(3) |
| C(31)  | 80(4)   | 25(2)  | 72(4)  | -12(2) | 4(3)   | -8(3)  |
| C(32)  | 84(5)   | 32(2)  | 60(4)  | -11(2) | 5(3)   | -4(3)  |
| C(33)  | 92(5)   | 18(2)  | 58(3)  | -4(2)  | -2(3)  | -5(2)  |
| C(34)  | 105(5)  | 21(2)  | 45(3)  | -2(2)  | -3(3)  | 2(3)   |
| C(35)  | 63(5)   | 39(3)  | 111(6) | -23(3) | 15(4)  | -3(3)  |
| C(28)  | 88(5)   | 31(3)  | 90(5)  | -25(3) | 5(4)   | -4(3)  |
| C(36)  | 130(8)  | 53(4)  | 104(7) | -37(5) | -6(6)  | -6(5)  |
| C(37)  | 148(9)  | 54(4)  | 113(7) | -28(5) | -7(7)  | 4(5)   |
| C(38)  | 132(7)  | 34(3)  | 82(5)  | -21(3) | 24(5)  | -9(4)  |
| C(39)  | 96(5)   | 42(3)  | 65(4)  | -15(3) | 1(4)   | -3(3)  |
| C(40)  | 107(6)  | 28(2)  | 65(4)  | -6(2)  | 7(4)   | -4(3)  |
| C(41)  | 168(10) | 87(6)  | 93(6)  | -44(5) | 32(7)  | -28(7) |
| C(42)  | 129(7)  | 60(4)  | 72(5)  | -23(4) | 10(5)  | -3(5)  |
| C(43)  | 134(7)  | 41(3)  | 69(4)  | 5(3)   | 7(4)   | -2(4)  |
| C(44)  | 162(9)  | 57(4)  | 78(5)  | 5(4)   | -7(6)  | -14(5) |

**Table S42.** Hydrogen coordinates ( $\times 10^4$ ) and isotropic displacement parameters ( $\text{Å}^2 \times 10^3$ ) for **36**.

|        | x        | y        | z        | U(eq)   |
|--------|----------|----------|----------|---------|
| H(2N)  | 6860(90) | 5490(60) | 4690(30) | 120(30) |
| H(5N)  | 5520(50) | 4000(40) | 4971(17) | 51(16)  |
| H(1)   | 4749     | 4348     | 6298     | 76      |
| H(2)   | 4630     | 5462     | 6977     | 73      |
| H(3)   | 5594     | 6755     | 6759     | 72      |
| H(6)   | 6372     | 8229     | 5397     | 71      |
| H(7)   | 6768     | 8471     | 6414     | 74      |
| H(9A)  | 9360     | 9211     | 5537     | 85      |
| H(9B)  | 8667     | 9999     | 5262     | 85      |
| H(10A) | 7479     | 9085     | 4667     | 82      |
| H(10B) | 8840     | 8883     | 4532     | 82      |
| H(11)  | 8797     | 7790     | 5269     | 66      |
| H(15)  | 6711     | 10070    | 5278     | 78      |

|        |      |       |      |     |
|--------|------|-------|------|-----|
| H(16A) | 5579 | 9763  | 6365 | 90  |
| H(16B) | 5042 | 10260 | 5771 | 90  |
| H(15A) | 6029 | 9669  | 6301 | 76  |
| H(16C) | 6540 | 10289 | 5151 | 90  |
| H(16D) | 5300 | 10412 | 5525 | 90  |
| H(17A) | 9077 | 9621  | 6550 | 131 |
| H(17B) | 7802 | 9805  | 6828 | 131 |
| H(17C) | 8382 | 10461 | 6364 | 131 |
| H(18A) | 6528 | 7072  | 3904 | 107 |
| H(18B) | 7096 | 7997  | 3902 | 107 |
| H(18C) | 6084 | 7768  | 4378 | 107 |
| H(19A) | 9310 | 6650  | 4598 | 108 |
| H(19B) | 9165 | 7328  | 4065 | 108 |
| H(19C) | 8511 | 6434  | 4022 | 108 |
| H(21)  | 8138 | 5099  | 3468 | 86  |
| H(22)  | 8006 | 4098  | 2711 | 81  |
| H(23)  | 6747 | 2937  | 2820 | 77  |
| H(26)  | 3933 | 2051  | 3616 | 72  |
| H(27)  | 5341 | 1341  | 3037 | 73  |
| H(29A) | 3431 | -296  | 4121 | 92  |
| H(29B) | 4722 | -47   | 4345 | 92  |
| H(30A) | 2761 | 1096  | 4300 | 87  |
| H(30B) | 3350 | 736   | 4909 | 87  |
| H(31)  | 5148 | 1377  | 4638 | 71  |
| H(36)  | 2565 | 311   | 3260 | 115 |
| H(37A) | 3777 | 1364  | 2493 | 126 |
| H(37B) | 2364 | 1138  | 2480 | 126 |
| H(38A) | 4424 | -870  | 3201 | 124 |
| H(38B) | 5691 | -509  | 3382 | 124 |
| H(38C) | 5114 | -259  | 2746 | 124 |
| H(39A) | 2866 | 3344  | 4951 | 101 |
| H(39B) | 2382 | 2395  | 4921 | 101 |
| H(39C) | 2783 | 2866  | 4314 | 101 |
| H(40A) | 5250 | 2181  | 5566 | 100 |
| H(40B) | 3894 | 1963  | 5685 | 100 |
| H(40C) | 4334 | 2924  | 5706 | 100 |
| H(41A) | 6183 | 7933  | 7327 | 174 |
| H(41B) | 6375 | 8499  | 7919 | 174 |
| H(41C) | 5372 | 8744  | 7442 | 174 |
| H(42A) | 5356 | 7279  | 8185 | 104 |
| H(42B) | 4522 | 8086  | 8281 | 104 |
| H(43A) | 2854 | 7264  | 8195 | 97  |
| H(43B) | 3589 | 6415  | 8074 | 97  |
| H(44A) | 1935 | 7127  | 7269 | 148 |
| H(44B) | 1749 | 6279  | 7653 | 148 |
| H(44C) | 2703 | 6305  | 7120 | 148 |

**Table S43.** Torsion angles [deg] for **36**.

|                      |          |
|----------------------|----------|
| C(20)-N(1)-C(1)-C(2) | 1.1(10)  |
| N(1)-C(1)-C(2)-C(3)  | -1.4(12) |
| C(1)-C(2)-C(3)-C(4)  | 1.9(11)  |
| C(2)-C(3)-C(4)-C(20) | -2.2(10) |
| C(2)-C(3)-C(4)-C(5)  | 178.7(8) |

|                         |            |
|-------------------------|------------|
| C(3)-C(4)-C(5)-C(13)    | -179.6(8)  |
| C(20)-C(4)-C(5)-C(13)   | 1.2(8)     |
| C(3)-C(4)-C(5)-C(6)     | -16.0(17)  |
| C(20)-C(4)-C(5)-C(6)    | 164.8(9)   |
| C(13)-C(5)-C(6)-C(7)    | -147.4(7)  |
| C(4)-C(5)-C(6)-C(7)     | 48.9(13)   |
| C(13)-C(5)-C(6)-C(11)   | -22.9(7)   |
| C(4)-C(5)-C(6)-C(11)    | 173.5(9)   |
| C(5)-C(6)-C(7)-N(3)     | 52.4(9)    |
| C(11)-C(6)-C(7)-N(3)    | -66.8(7)   |
| C(5)-C(6)-C(7)-C(8A)    | 176.1(6)   |
| C(11)-C(6)-C(7)-C(8A)   | 56.9(7)    |
| C(5)-C(6)-C(7)-C(8)     | 176.1(6)   |
| C(11)-C(6)-C(7)-C(8)    | 56.9(7)    |
| C(8A)-C(9)-C(10)-C(11)  | -55.9(8)   |
| C(8)-C(9)-C(10)-C(11)   | -55.9(8)   |
| C(9)-C(10)-C(11)-C(6)   | 58.9(8)    |
| C(9)-C(10)-C(11)-C(12)  | -178.1(6)  |
| C(5)-C(6)-C(11)-C(10)   | 165.2(6)   |
| C(7)-C(6)-C(11)-C(10)   | -63.3(7)   |
| C(5)-C(6)-C(11)-C(12)   | 34.6(6)    |
| C(7)-C(6)-C(11)-C(12)   | 166.1(5)   |
| C(10)-C(11)-C(12)-C(13) | -156.9(7)  |
| C(6)-C(11)-C(12)-C(13)  | -32.1(6)   |
| C(10)-C(11)-C(12)-C(19) | 83.9(8)    |
| C(6)-C(11)-C(12)-C(19)  | -151.2(5)  |
| C(10)-C(11)-C(12)-C(18) | -42.7(9)   |
| C(6)-C(11)-C(12)-C(18)  | 82.2(6)    |
| C(4)-C(5)-C(13)-N(2)    | 0.1(8)     |
| C(6)-C(5)-C(13)-N(2)    | -169.7(6)  |
| C(4)-C(5)-C(13)-C(12)   | 172.2(6)   |
| C(6)-C(5)-C(13)-C(12)   | 2.5(9)     |
| C(20)-N(2)-C(13)-C(5)   | -1.4(8)    |
| C(20)-N(2)-C(13)-C(12)  | -171.8(7)  |
| C(19)-C(12)-C(13)-C(5)  | 137.4(7)   |
| C(18)-C(12)-C(13)-C(5)  | -97.7(7)   |
| C(11)-C(12)-C(13)-C(5)  | 18.7(8)    |
| C(19)-C(12)-C(13)-N(2)  | -52.5(10)  |
| C(18)-C(12)-C(13)-N(2)  | 72.4(9)    |
| C(11)-C(12)-C(13)-N(2)  | -171.2(7)  |
| C(10)-C(9)-C(8)-C(17)   | 172.8(6)   |
| C(10)-C(9)-C(8)-C(15)   | -67.5(8)   |
| C(10)-C(9)-C(8)-C(7)    | 51.5(8)    |
| N(3)-C(7)-C(8)-C(17)    | -46.1(8)   |
| C(6)-C(7)-C(8)-C(17)    | -170.1(7)  |
| N(3)-C(7)-C(8)-C(9)     | 74.6(7)    |
| C(6)-C(7)-C(8)-C(9)     | -49.4(8)   |
| N(3)-C(7)-C(8)-C(15)    | -173.1(8)  |
| C(6)-C(7)-C(8)-C(15)    | 62.8(10)   |
| C(17)-C(8)-C(15)-C(16)  | -66.5(16)  |
| C(9)-C(8)-C(15)-C(16)   | 176.7(13)  |
| C(7)-C(8)-C(15)-C(16)   | 59.0(15)   |
| C(10)-C(9)-C(8A)-C(15A) | -67.2(14)  |
| C(10)-C(9)-C(8A)-C(17)  | 172.8(6)   |
| C(10)-C(9)-C(8A)-C(7)   | 51.5(8)    |
| N(3)-C(7)-C(8A)-C(15A)  | -151.6(10) |

|                           |           |
|---------------------------|-----------|
| C(6)-C(7)-C(8A)-C(15A)    | 84.4(10)  |
| N(3)-C(7)-C(8A)-C(17)     | -46.1(8)  |
| C(6)-C(7)-C(8A)-C(17)     | -170.1(7) |
| N(3)-C(7)-C(8A)-C(9)      | 74.6(7)   |
| C(6)-C(7)-C(8A)-C(9)      | -49.4(8)  |
| C(17)-C(8A)-C(15A)-C(16A) | 118(2)    |
| C(9)-C(8A)-C(15A)-C(16A)  | -6(3)     |
| C(7)-C(8A)-C(15A)-C(16A)  | -130(2)   |
| C(1)-N(1)-C(20)-N(2)      | -177.4(6) |
| C(1)-N(1)-C(20)-C(4)      | -1.5(10)  |
| C(13)-N(2)-C(20)-N(1)     | 178.7(6)  |
| C(13)-N(2)-C(20)-C(4)     | 2.2(7)    |
| C(3)-C(4)-C(20)-N(1)      | 2.1(10)   |
| C(5)-C(4)-C(20)-N(1)      | -178.5(6) |
| C(3)-C(4)-C(20)-N(2)      | 178.5(6)  |
| C(5)-C(4)-C(20)-N(2)      | -2.1(7)   |
| C(34)-N(4)-C(21)-C(22)    | -0.6(11)  |
| N(4)-C(21)-C(22)-C(23)    | 0.5(12)   |
| C(21)-C(22)-C(23)-C(24)   | -1.0(11)  |
| C(22)-C(23)-C(24)-C(34)   | 1.6(10)   |
| C(22)-C(23)-C(24)-C(25)   | -177.5(8) |
| C(23)-C(24)-C(25)-C(33)   | 179.6(8)  |
| C(34)-C(24)-C(25)-C(33)   | 0.4(7)    |
| C(23)-C(24)-C(25)-C(26)   | -6.6(17)  |
| C(34)-C(24)-C(25)-C(26)   | 174.3(9)  |
| C(33)-C(25)-C(26)-C(27)   | -145.4(6) |
| C(24)-C(25)-C(26)-C(27)   | 40.7(13)  |
| C(33)-C(25)-C(26)-C(31)   | -23.6(7)  |
| C(24)-C(25)-C(26)-C(31)   | 162.6(9)  |
| C(25)-C(26)-C(27)-N(6)    | 51.3(8)   |
| C(31)-C(26)-C(27)-N(6)    | -65.4(7)  |
| C(25)-C(26)-C(27)-C(28)   | 174.5(6)  |
| C(31)-C(26)-C(27)-C(28)   | 57.7(8)   |
| C(28)-C(29)-C(30)-C(31)   | -56.3(9)  |
| C(29)-C(30)-C(31)-C(26)   | 58.6(8)   |
| C(29)-C(30)-C(31)-C(32)   | -176.1(7) |
| C(25)-C(26)-C(31)-C(30)   | 169.8(6)  |
| C(27)-C(26)-C(31)-C(30)   | -61.6(8)  |
| C(25)-C(26)-C(31)-C(32)   | 36.4(7)   |
| C(27)-C(26)-C(31)-C(32)   | 165.0(6)  |
| C(30)-C(31)-C(32)-C(33)   | -161.9(7) |
| C(26)-C(31)-C(32)-C(33)   | -34.2(7)  |
| C(30)-C(31)-C(32)-C(39)   | -45.5(9)  |
| C(26)-C(31)-C(32)-C(39)   | 82.3(7)   |
| C(30)-C(31)-C(32)-C(40)   | 78.1(9)   |
| C(26)-C(31)-C(32)-C(40)   | -154.2(6) |
| C(34)-N(5)-C(33)-C(25)    | 0.2(7)    |
| C(34)-N(5)-C(33)-C(32)    | -177.6(7) |
| C(24)-C(25)-C(33)-N(5)    | -0.4(8)   |
| C(26)-C(25)-C(33)-N(5)    | -176.6(6) |
| C(24)-C(25)-C(33)-C(32)   | 177.9(6)  |
| C(26)-C(25)-C(33)-C(32)   | 1.7(8)    |
| C(39)-C(32)-C(33)-N(5)    | 81.1(9)   |
| C(40)-C(32)-C(33)-N(5)    | -43.1(10) |
| C(31)-C(32)-C(33)-N(5)    | -162.0(7) |
| C(39)-C(32)-C(33)-C(25)   | -96.6(6)  |

|                         |           |
|-------------------------|-----------|
| C(40)-C(32)-C(33)-C(25) | 139.2(6)  |
| C(31)-C(32)-C(33)-C(25) | 20.3(7)   |
| C(21)-N(4)-C(34)-N(5)   | 178.8(7)  |
| C(21)-N(4)-C(34)-C(24)  | 1.4(10)   |
| C(33)-N(5)-C(34)-N(4)   | -177.7(6) |
| C(33)-N(5)-C(34)-C(24)  | 0.1(7)    |
| C(23)-C(24)-C(34)-N(4)  | -1.9(10)  |
| C(25)-C(24)-C(34)-N(4)  | 177.4(6)  |
| C(23)-C(24)-C(34)-N(5)  | -179.6(6) |
| C(25)-C(24)-C(34)-N(5)  | -0.3(7)   |
| C(30)-C(29)-C(28)-C(36) | -67.0(8)  |
| C(30)-C(29)-C(28)-C(38) | 175.7(7)  |
| C(30)-C(29)-C(28)-C(27) | 54.5(9)   |
| N(6)-C(27)-C(28)-C(36)  | -170.8(6) |
| C(26)-C(27)-C(28)-C(36) | 66.2(8)   |
| N(6)-C(27)-C(28)-C(38)  | -51.1(8)  |
| C(26)-C(27)-C(28)-C(38) | -174.1(6) |
| N(6)-C(27)-C(28)-C(29)  | 69.6(7)   |
| C(26)-C(27)-C(28)-C(29) | -53.4(8)  |
| C(38)-C(28)-C(36)-C(37) | -89.8(9)  |
| C(29)-C(28)-C(36)-C(37) | 152.0(8)  |
| C(27)-C(28)-C(36)-C(37) | 31.3(11)  |
| C(43)-O(1)-C(42)-C(41)  | -176.6(7) |
| C(42)-O(1)-C(43)-C(44)  | 174.7(7)  |

---

Symmetry transformations used to generate equivalent atoms:

**Table S44.** Hydrogen bonds for **36** [A and deg.].

---

| D-H...A           | d(D-H)  | d(H...A) | d(D...A) | <(DHA)  |
|-------------------|---------|----------|----------|---------|
| N(2)-H(2N)...N(4) | 0.91(3) | 2.00(3)  | 2.903(7) | 171(11) |
| N(5)-H(5N)...N(1) | 0.90(3) | 2.09(3)  | 2.952(6) | 159(6)  |

---

Symmetry transformations used to generate equivalent atoms:

## Computational Methods

Conformational searches of all hapalindole and fischerindole products were performed using the Schrödinger MacroModel<sup>2</sup> software package, and the lowest energy conformation was used for all reported quantum mechanical computations. All quantum mechanical calculations were performed using the Gaussian 09<sup>3</sup> software package on an ultrafine grid. Structures were optimized at the B3LYP<sup>4,5</sup>/6-31G(d) level of theory; frequency calculations were used to confirm the presence of local minima (no imaginary frequencies) and transition states (one imaginary frequency). Thermochemistry corrections to obtain enthalpies and free energies were computed at 25 °C and 1 M. To obtain more accurate energetics, single-point energy calculations were performed on the optimized structures at the B3LYP<sup>4,5</sup>/6-311++G(d,p) level of theory using Grimme's D3(BJ) dispersion correction<sup>6,7</sup> and the CPCM<sup>8-10</sup> solvent model for diethyl ether, which is intended to mimic the hydrophobic nature of the enzyme active sites.

**Table S45: Optimized Quantum Mechanical Energies and Geometries**

| <b>Structure</b>               | <b>Single-Point Energy<br/>(Hartree)</b><br><br>B3LYP/6-311++G(d,p)<br><br>CPCM diethyl ether solvent | <b>Enthalpy Correction<br/>(Hartree)</b><br><br>B3LYP/6-31G(d) | <b>Gibbs Free Energy<br/>Correction<br/>(Hartree)</b><br><br>B3LYP/6-31G(d) |
|--------------------------------|-------------------------------------------------------------------------------------------------------|----------------------------------------------------------------|-----------------------------------------------------------------------------|
| <b>2-T</b>                     | -924.869068910                                                                                        | 0.436100                                                       | 0.362161                                                                    |
| TS from<br><b>2-T to 2-H</b>   | -924.861768738                                                                                        | 0.435517                                                       | 0.366601                                                                    |
| <b>2-H</b>                     | -924.879360164                                                                                        | 0.437886                                                       | 0.369401                                                                    |
| TS from<br><b>2-T to 2-F</b>   | -924.869011094                                                                                        | 0.435240                                                       | 0.364728                                                                    |
| <b>2-F</b>                     | -924.890827959                                                                                        | 0.437475                                                       | 0.367863                                                                    |
| <b>17-T</b>                    | -940.910995530                                                                                        | 0.424076                                                       | 0.350630                                                                    |
| TS from<br><b>17-T to 17-H</b> | -940.891628344                                                                                        | 0.423525                                                       | 0.354648                                                                    |
| <b>17-H</b>                    | -940.901120546                                                                                        | 0.425162                                                       | 0.356731                                                                    |
| TS from<br><b>17-T to 17-F</b> | -940.910547946                                                                                        | 0.423316                                                       | 0.353193                                                                    |
| <b>17-F</b>                    | -940.930000542                                                                                        | 0.425439                                                       | 0.356083                                                                    |
| <b>18-T</b>                    | -1040.17431066                                                                                        | 0.416424                                                       | 0.340667                                                                    |
| TS from<br><b>18-T to 18-H</b> | -1040.15655568                                                                                        | 0.416097                                                       | 0.345202                                                                    |
| <b>18-H</b>                    | -1040.16622917                                                                                        | 0.418282                                                       | 0.348253                                                                    |
| TS from<br><b>18-T to 18-F</b> | -1040.17270403                                                                                        | 0.415794                                                       | 0.343746                                                                    |
| <b>18-F</b>                    | -1040.19039875                                                                                        | 0.417846                                                       | 0.346430                                                                    |



**Table S46: Optimized Quantum Mechanical Geometries**

**2-T**

| 1 | 1         |           |           |
|---|-----------|-----------|-----------|
| C | -3.514752 | 2.323036  | -0.919023 |
| C | -4.631133 | 1.713579  | -0.311448 |
| C | -4.504197 | 0.564819  | 0.467282  |
| H | -3.659192 | 3.217824  | -1.515951 |
| H | -5.615288 | 2.149323  | -0.453066 |
| H | -5.369711 | 0.100061  | 0.929423  |
| C | -1.433591 | -1.197740 | 1.195781  |
| C | -0.942157 | -0.160015 | 0.385836  |
| C | -2.078233 | 0.643549  | 0.027683  |
| C | -3.219971 | 0.049236  | 0.626963  |
| N | -2.780798 | -1.070067 | 1.329387  |
| H | -0.891712 | -1.936683 | 1.767641  |
| C | -0.084588 | -2.100048 | -1.004059 |
| C | 1.037414  | -1.371321 | -0.317839 |
| C | 0.494153  | 0.034567  | -0.023712 |
| C | 2.393314  | -1.287859 | -1.059636 |
| C | 3.369572  | -0.470167 | -0.183700 |
| C | 2.866841  | 0.923831  | 0.273527  |
| C | 1.444972  | 0.790383  | 0.938180  |
| C | -0.344288 | -3.528584 | -0.674624 |
| C | -0.655823 | -1.607631 | -2.286482 |
| N | 1.493421  | 0.103507  | 2.189513  |
| C | 1.488677  | -0.525809 | 3.186743  |
| C | 2.731266  | 1.933572  | -0.858078 |
| C | 3.225260  | 1.855084  | -2.094727 |
| C | 3.862648  | 1.514792  | 1.298492  |
| H | 1.221820  | -1.878256 | 0.636685  |
| H | 0.509261  | 0.614199  | -0.953091 |
| H | 2.250639  | -0.814869 | -2.036832 |
| H | 2.808478  | -2.287334 | -1.231248 |
| H | 4.316783  | -0.350099 | -0.720164 |
| H | 3.604272  | -1.056112 | 0.713288  |
| H | 1.051521  | 1.795054  | 1.133462  |
| H | -1.382066 | -3.820765 | -0.862422 |
| H | 0.272295  | -4.131116 | -1.366555 |
| H | -0.047052 | -3.802094 | 0.339572  |
| H | -1.711347 | -1.879690 | -2.389199 |
| H | -0.534561 | -0.537050 | -2.451251 |
| H | -0.124839 | -2.133115 | -3.099733 |
| H | 2.221494  | 2.855383  | -0.568868 |
| H | 3.119614  | 2.682902  | -2.789872 |
| H | 3.775381  | 0.993315  | -2.462571 |
| H | 3.962809  | 0.868124  | 2.175394  |
| H | 4.847142  | 1.629519  | 0.835593  |
| H | 3.537775  | 2.503971  | 1.640214  |
| C | -2.239207 | 1.797936  | -0.762509 |
| H | -1.384477 | 2.279525  | -1.229412 |
| H | -3.364462 | -1.667346 | 1.898760  |

**TS from 2-T to 2-H**

| 1 | 1         |           |           |
|---|-----------|-----------|-----------|
| C | -3.497926 | -1.417648 | -0.871284 |
| C | -4.537352 | -0.518690 | -0.654609 |
| C | -4.303382 | 0.863331  | -0.466489 |
| H | -3.729712 | -2.459322 | -1.072533 |
| H | -5.562340 | -0.875281 | -0.657043 |
| H | -5.136515 | 1.541698  | -0.306173 |
| C | -1.046114 | 2.397105  | -0.185033 |
| C | -0.700614 | 1.080820  | -0.471471 |
| C | -1.916076 | 0.397641  | -0.684607 |
| C | -2.989734 | 1.302462  | -0.475862 |
| N | -2.408805 | 2.535596  | -0.216978 |
| H | -0.420239 | 3.243097  | 0.061572  |
| C | -0.858496 | -1.536921 | 1.001761  |
| C | 0.451268  | -0.784217 | 0.814919  |
| C | 0.551985  | 0.283472  | -0.376954 |
| C | 1.690113  | -1.708135 | -0.724982 |
| C | 3.001977  | -0.907186 | 0.783177  |
| C | 3.133760  | 0.193381  | -0.289551 |
| C | 1.858171  | 1.099572  | -0.230848 |
| C | -1.756621 | -1.011268 | 2.079257  |
| C | -0.907431 | -3.020408 | 0.782549  |
| N | 1.811358  | 1.875834  | 0.971755  |
| C | 1.749900  | 2.490689  | 1.976393  |
| C | 3.242404  | -0.334335 | -1.714129 |
| C | 3.560782  | -1.568183 | -2.108064 |
| C | 4.395733  | 1.044405  | -0.019309 |
| H | 0.541760  | -0.164624 | 1.717397  |
| H | 0.668719  | -0.303333 | -1.296678 |
| H | 1.649026  | -2.294359 | -0.198699 |
| H | 1.683955  | -2.420411 | 1.557619  |
| H | 3.848263  | -1.598259 | 0.706124  |
| H | 3.088735  | -0.436036 | 1.770139  |
| H | 1.903812  | 1.809354  | -1.066313 |
| H | -2.763513 | -1.431778 | 2.037182  |
| H | -1.310057 | -1.315066 | 3.041246  |
| H | -1.801331 | 0.080759  | 2.088587  |
| H | -1.931385 | -3.398467 | 0.800394  |
| H | -0.407150 | -3.346812 | -0.131641 |
| H | -0.374037 | -3.495752 | 1.621849  |
| H | 3.109829  | 0.429987  | -2.483100 |
| H | 3.680530  | -1.802804 | -3.161732 |
| H | 3.742572  | -2.385107 | -1.414882 |
| H | 4.361517  | 1.508398  | 0.970998  |
| H | 5.285414  | 0.410518  | -0.075482 |
| H | 4.506309  | 1.839403  | -0.765620 |
| C | -2.147595 | -0.981751 | -0.884714 |
| H | -1.397534 | -1.599707 | -1.367308 |
| H | -2.903022 | 3.399073  | -0.040020 |

**2-H**

|   |           |           |           |
|---|-----------|-----------|-----------|
| 1 | 1         |           |           |
| C | 3.540333  | 1.337070  | -0.254846 |
| C | 4.532774  | 0.403160  | -0.156895 |
| C | 4.265518  | -1.008142 | -0.222102 |
| H | 3.800615  | 2.391056  | -0.222185 |
| H | 5.562577  | 0.718123  | -0.024331 |
| H | 5.087058  | -1.712359 | -0.117865 |
| C | 1.014722  | -2.506372 | -0.502058 |
| C | 0.700799  | -1.132706 | -0.552073 |
| C | 1.913340  | -0.476196 | -0.493308 |
| C | 2.968201  | -1.421243 | -0.397567 |
| N | 2.359611  | -2.673677 | -0.427149 |
| H | 0.359488  | -3.366955 | -0.491658 |
| C | 0.977074  | 1.732813  | 0.371196  |
| C | -0.330513 | 0.835930  | 0.538516  |
| C | -0.557347 | -0.313418 | -0.506214 |
| C | -1.611024 | 1.687772  | 0.659288  |
| C | -2.862705 | 0.844606  | 0.949314  |
| C | -3.113848 | -0.281277 | -0.074965 |
| C | -1.819371 | -1.152284 | -0.172001 |
| C | 1.521277  | 2.007885  | 1.788932  |
| C | 0.714174  | 3.071815  | -0.344948 |
| N | -1.588546 | -1.896238 | 1.032064  |
| C | -1.356232 | -2.498592 | 2.018944  |
| C | -3.432575 | 0.207394  | -1.481821 |
| C | -3.857847 | 1.416269  | -1.850825 |
| C | -4.301566 | -1.159737 | 0.381859  |
| H | -0.196953 | 0.308635  | 1.492157  |
| H | -0.741890 | 0.130266  | -1.494974 |
| H | -1.762027 | 2.255959  | -0.262726 |
| H | -1.489411 | 2.420075  | 1.465945  |
| H | -3.741010 | 1.497751  | 0.996128  |
| H | -2.773853 | 0.387843  | 1.942931  |
| H | -1.965559 | -1.890778 | -0.971881 |
| H | 2.349054  | 2.724737  | 1.774645  |
| H | 0.733382  | 2.435241  | 2.417922  |
| H | 1.868994  | 1.088755  | 2.273664  |
| H | 1.655225  | 3.611616  | -0.504257 |
| H | 0.242809  | 2.931257  | -1.324637 |
| H | 0.070821  | 3.725326  | 0.248996  |
| H | -3.371740 | -0.569153 | -2.248091 |
| H | -4.128715 | 1.621015  | -2.882555 |
| H | -3.978947 | 2.240363  | -1.153229 |
| H | -4.121038 | -1.594438 | 1.369620  |
| H | -5.209014 | -0.551038 | 0.431135  |
| H | -4.488151 | -1.977976 | -0.323524 |
| C | 2.110587  | 0.974910  | -0.489108 |
| H | 1.919563  | 1.314490  | -1.527713 |
| H | 2.826637  | -3.568340 | -0.353829 |

**TS from 2-T to 2-F**

|   |           |           |           |
|---|-----------|-----------|-----------|
| 1 | 1         |           |           |
| C | 2.225726  | -1.887033 | -0.679098 |
| C | 3.500951  | -2.400374 | -0.848392 |
| C | 4.629799  | -1.731302 | -0.325125 |
| C | 4.515084  | -0.534300 | 0.375567  |
| H | 1.361741  | -2.409164 | -1.080319 |
| H | 3.641377  | -3.330404 | -1.389645 |
| H | 5.615136  | -2.161421 | -0.476138 |
| H | 5.390254  | -0.025180 | 0.767163  |
| N | 2.800950  | 1.135216  | 1.181209  |
| C | 3.228308  | -0.026459 | 0.552428  |
| C | 2.073596  | -0.684287 | 0.043401  |
| C | 0.942421  | 0.115792  | 0.393141  |
| C | 0.095351  | 2.154689  | -0.878075 |
| C | 0.710377  | 1.724332  | -2.165537 |
| C | 0.260017  | 3.595719  | -0.528749 |
| C | -1.023093 | 1.371221  | -0.242724 |
| C | -2.377222 | 1.336258  | -0.990717 |
| C | -3.362195 | 0.480343  | -0.161696 |
| C | -2.870082 | -0.937711 | 0.227396  |
| C | -1.448112 | -0.848303 | 0.899887  |
| C | -0.491444 | -0.053309 | -0.024546 |
| H | -2.234746 | 0.915920  | -1.991809 |
| H | -2.786183 | 2.345894  | -1.109679 |
| H | -4.307717 | 0.392805  | -0.707305 |
| H | -3.597321 | 1.021795  | 0.762712  |
| C | -3.871362 | -1.570783 | 1.221549  |
| C | -2.739973 | -1.892143 | -0.951710 |
| N | -1.491858 | -0.223048 | 2.183028  |
| H | -1.064301 | -1.864844 | 1.046114  |
| H | -1.214349 | 1.819760  | 0.739714  |
| H | -0.510927 | -0.586741 | -0.981813 |
| C | -3.226572 | -1.747934 | -2.185363 |
| C | -1.486897 | 0.356452  | 3.210198  |
| H | 0.624550  | 0.657200  | -2.369921 |
| H | 0.191020  | 2.266047  | -2.974606 |
| H | 1.761589  | 2.025416  | -2.227137 |
| H | 1.277436  | 3.957155  | -0.705920 |
| H | -0.392734 | 4.166747  | -1.213040 |
| H | -0.057027 | 3.834979  | 0.488645  |
| H | -3.554458 | -2.578090 | 1.514309  |
| H | -3.967300 | -0.967314 | 2.129140  |
| H | -4.856248 | -1.654931 | 0.752979  |
| H | -2.241761 | -2.832672 | -0.705640 |
| H | -3.125822 | -2.541771 | -2.919753 |
| H | -3.765333 | -0.863209 | -2.513293 |
| C | 1.440601  | 1.230232  | 1.094656  |
| H | 0.906405  | 1.958814  | 1.685901  |
| H | 3.391388  | 1.761421  | 1.710727  |

## 2-F

|   |           |           |           |
|---|-----------|-----------|-----------|
| 1 | 1         |           |           |
| C | 2.315459  | -2.174391 | -0.368852 |
| C | 3.607146  | -2.586507 | -0.547989 |
| C | 4.701422  | -1.676347 | -0.371737 |
| C | 4.531633  | -0.352854 | -0.028639 |
| H | 1.482053  | -2.858421 | -0.490617 |
| H | 3.823106  | -3.613266 | -0.823202 |
| H | 5.709569  | -2.051819 | -0.522450 |
| H | 5.377817  | 0.315976  | 0.088689  |
| N | 2.758418  | 1.339002  | 0.425423  |
| C | 3.206584  | 0.097693  | 0.152253  |
| C | 2.081220  | -0.815438 | 0.012012  |
| C | 0.942180  | -0.076838 | 0.256024  |
| C | 0.288479  | 2.215211  | -0.162126 |
| C | 0.629111  | 2.304407  | -1.657574 |
| C | 0.188012  | 3.618441  | 0.446919  |
| C | -0.970004 | 1.334416  | 0.147959  |
| C | -2.309306 | 1.562037  | -0.548066 |
| C | -3.333733 | 0.552154  | 0.024862  |
| C | -2.911811 | -0.942666 | 0.002971  |
| C | -1.473401 | -1.124482 | 0.626832  |
| C | -0.512264 | -0.131752 | -0.070319 |
| H | -2.202497 | 1.441988  | -1.631770 |
| H | -2.678548 | 2.578689  | -0.370369 |
| H | -4.289428 | 0.651358  | -0.500220 |
| H | -3.536233 | 0.824925  | 1.068131  |
| C | -3.928183 | -1.773853 | 0.819787  |
| C | -2.850979 | -1.546685 | -1.393005 |
| N | -1.443904 | -0.910761 | 2.037519  |
| H | -1.150121 | -2.157446 | 0.450481  |
| H | -1.147909 | 1.450811  | 1.227213  |
| H | -0.583042 | -0.380072 | -1.140925 |
| C | -3.308684 | -1.030294 | -2.535110 |
| C | -1.392461 | -0.695620 | 3.196458  |
| H | 0.716600  | 1.324796  | -2.139699 |
| H | -0.150116 | 2.864260  | -2.183794 |
| H | 1.573565  | 2.836298  | -1.811875 |
| H | 1.118887  | 4.181676  | 0.312911  |
| H | -0.606019 | 4.189412  | -0.045529 |
| H | -0.040583 | 3.581381  | 1.518353  |
| H | -3.665342 | -2.837950 | 0.819224  |
| H | -3.975575 | -1.435137 | 1.858978  |
| H | -4.923748 | -1.676811 | 0.377201  |
| H | -2.436414 | -2.557301 | -1.420354 |
| H | -3.264601 | -1.598900 | -3.459510 |
| H | -3.765807 | -0.047395 | -2.601859 |
| C | 1.323430  | 1.312279  | 0.623650  |
| H | 1.112943  | 1.463218  | 1.697238  |
| H | 3.356744  | 2.098579  | 0.725303  |

## 17-T

|   |           |           |           |
|---|-----------|-----------|-----------|
| 1 | 1         |           |           |
| C | 3.592236  | -2.264871 | -0.973712 |
| C | 4.646266  | -1.588917 | -0.323248 |
| H | 3.815696  | -3.139145 | -1.575573 |
| H | 5.666594  | -1.948178 | -0.430005 |
| C | 1.466943  | 1.134215  | 1.188469  |
| C | 0.954153  | 0.114974  | 0.367423  |
| C | 2.078568  | -0.680412 | -0.029274 |
| C | 3.232624  | -0.098549 | 0.561886  |
| N | 2.819523  | 1.004675  | 1.293339  |
| H | 0.936912  | 1.852494  | 1.796270  |
| C | 0.032874  | 2.193531  | -0.878003 |
| C | -1.041650 | 1.385276  | -0.213329 |
| C | -0.486726 | -0.038192 | -0.041344 |
| C | -2.416406 | 1.350114  | -0.932154 |
| C | -3.371659 | 0.461357  | -0.104709 |
| C | -2.854264 | -0.960722 | 0.229299  |
| C | -1.421569 | -0.868511 | 0.876168  |
| C | 0.252931  | 3.603924  | -0.460734 |
| C | 0.603285  | 1.797273  | -2.192342 |
| N | -1.450895 | -0.277426 | 2.175554  |
| C | -1.435349 | 0.276632  | 3.216627  |
| C | -2.734173 | -1.876077 | -0.981429 |
| C | -3.252861 | -1.703970 | -2.198369 |
| C | -3.826708 | -1.638389 | 1.222702  |
| H | -1.210589 | 1.814721  | 0.780986  |
| H | -0.517802 | -0.544116 | -1.012838 |
| H | -2.290900 | 0.956615  | -1.946116 |
| H | -2.837733 | 2.358086  | -1.015540 |
| H | -4.327735 | 0.380498  | -0.632813 |
| H | -3.591516 | 0.973167  | 0.839953  |
| H | -1.020340 | -1.882838 | 0.988117  |
| H | 1.267947  | 3.953209  | -0.672708 |
| H | -0.419333 | 4.223320  | -1.082943 |
| H | -0.011324 | 3.796317  | 0.580904  |
| H | 1.658376  | 2.079485  | -2.273778 |
| H | 0.482235  | 0.741967  | -2.435169 |
| H | 0.075141  | 2.384082  | -2.964424 |
| H | -2.213555 | -2.814125 | -0.775792 |
| H | -3.156004 | -2.473463 | -2.958723 |
| H | -3.816437 | -0.820660 | -2.486211 |
| H | -3.913804 | -1.064061 | 2.149863  |
| H | -4.819136 | -1.723573 | 0.770568  |
| H | -3.489326 | -2.649029 | 1.478584  |
| C | 2.286801  | -1.812151 | -0.838028 |
| H | 1.464161  | -2.324621 | -1.329349 |
| H | 3.436376  | 1.569836  | 1.862301  |
| N | 4.488543  | -0.501420 | 0.440972  |

TS from 17-T to 17-H

| 1 | 1         |           |           |
|---|-----------|-----------|-----------|
| C | -3.517498 | -1.354274 | -0.756432 |
| C | -4.490703 | -0.391342 | -0.529681 |
| H | -3.823756 | -2.383216 | -0.916432 |
| H | -5.538605 | -0.669999 | -0.479554 |
| C | -1.061656 | 2.419579  | -0.255310 |
| C | -0.690345 | 1.096765  | -0.531408 |
| C | -1.885922 | 0.397441  | -0.694271 |
| C | -2.979892 | 1.282778  | -0.458825 |
| N | -2.421999 | 2.538489  | -0.249929 |
| H | -0.441003 | 3.278518  | -0.040188 |
| C | -0.926604 | -1.575722 | 0.829088  |
| C | 0.397381  | -0.786344 | 0.724312  |
| C | 0.563830  | 0.296426  | -0.434847 |
| C | 1.645373  | -1.703901 | 0.702914  |
| C | 2.949241  | -0.899227 | 0.837573  |
| C | 3.137379  | 0.205580  | -0.221999 |
| C | 1.861241  | 1.111784  | -0.222955 |
| C | -1.773157 | -1.183578 | 2.014762  |
| C | -0.907661 | -3.061583 | 0.555836  |
| N | 1.751628  | 1.882439  | 0.979759  |
| C | 1.633605  | 2.495896  | 1.980318  |
| C | 3.317316  | -0.314667 | -1.642159 |
| C | 3.656191  | -1.546318 | -2.025706 |
| C | 4.383875  | 1.055119  | 0.116392  |
| H | 0.431233  | -0.187135 | 1.642768  |
| H | 0.706797  | -0.258692 | -1.370962 |
| H | 1.659674  | -2.288298 | -0.222368 |
| H | 1.595485  | -2.417363 | 1.532755  |
| H | 3.800131  | -1.588202 | 0.804499  |
| H | 2.980334  | -0.431780 | 1.829581  |
| H | 1.949811  | 1.826447  | -1.051019 |
| H | -2.752754 | -1.666040 | 2.014099  |
| H | -1.238076 | -1.518122 | 2.917225  |
| H | -1.892388 | -0.100657 | 2.104878  |
| H | -1.917509 | -3.477589 | 0.537863  |
| H | -0.386410 | -3.332756 | -0.364899 |
| H | -0.376672 | -3.550951 | 1.385185  |
| H | 3.224309  | 0.453775  | -2.412898 |
| H | 3.829804  | -1.775393 | -3.073070 |
| H | 3.803601  | -2.366481 | -1.328229 |
| H | 4.300111  | 1.512811  | 1.106688  |
| H | 5.275266  | 0.421436  | 0.100956  |
| H | 4.531710  | 1.854629  | -0.618548 |
| C | -2.133684 | -0.989263 | -0.829186 |
| H | -1.470793 | -1.604090 | -1.431704 |
| H | -2.945212 | 3.382177  | -0.052912 |
| N | -4.240338 | 0.944225  | -0.381862 |

17-H

| 1 | 1         |           |           |
|---|-----------|-----------|-----------|
| C | 3.568439  | 1.282990  | -0.209904 |
| C | 4.501404  | 0.286329  | -0.104118 |
| H | 3.899904  | 2.315189  | -0.152072 |
| H | 5.548044  | 0.515732  | 0.063190  |
| C | 1.052823  | -2.489651 | -0.519278 |
| C | 0.708716  | -1.107570 | -0.591433 |
| C | 1.900337  | -0.437421 | -0.532124 |
| C | 2.977337  | -1.367552 | -0.397183 |
| N | 2.389551  | -2.640552 | -0.428286 |
| H | 0.404241  | -3.355979 | -0.506413 |
| C | 0.968531  | 1.762502  | 0.344059  |
| C | -0.323561 | 0.845326  | 0.518618  |
| C | -0.558778 | -0.304500 | -0.530495 |
| C | -1.612265 | 1.682318  | 0.658180  |
| C | -2.847846 | 0.823830  | 0.971349  |
| C | -3.107493 | -0.302126 | -0.050559 |
| C | -1.806003 | -1.158094 | -0.179295 |
| C | 1.501989  | 2.073714  | 1.758122  |
| C | 0.689759  | 3.081100  | -0.402051 |
| N | -1.538129 | -1.909642 | 1.012729  |
| C | -1.270242 | -2.518755 | 1.986708  |
| C | -3.460649 | 0.186731  | -1.449341 |
| C | -3.903638 | 1.392881  | -1.806289 |
| C | -4.274233 | -1.196435 | 0.428997  |
| H | -0.171975 | 0.313976  | 1.467349  |
| H | -0.758959 | 0.141175  | -1.514890 |
| H | -1.784505 | 2.245912  | -0.262866 |
| H | -1.485961 | 2.417868  | 1.460906  |
| H | -3.732151 | 1.466975  | 1.037175  |
| H | -2.733927 | 0.366654  | 1.962247  |
| H | -1.960516 | -1.891604 | -0.982155 |
| H | 2.321669  | 2.798953  | 1.730220  |
| H | 0.706123  | 2.507853  | 2.372090  |
| H | 1.856813  | 1.170221  | 2.266172  |
| H | 1.624376  | 3.630728  | -0.565133 |
| H | 0.226906  | 2.913008  | -1.381581 |
| H | 0.032007  | 3.735962  | 0.174355  |
| H | -3.410937 | -0.587857 | -2.218349 |
| H | -4.198824 | 1.597087  | -2.831392 |
| H | -4.017005 | 2.214676  | -1.104692 |
| H | -4.068062 | -1.630920 | 1.411865  |
| H | -5.187662 | -0.598916 | 0.498736  |
| H | -4.465798 | -2.015195 | -0.274339 |
| C | 2.128568  | 1.001422  | -0.494436 |
| H | 1.982481  | 1.376138  | -1.528447 |
| H | 2.887964  | -3.517896 | -0.330671 |
| N | 4.218090  | -1.071518 | -0.182795 |

TS from 17-T to 17-F

| 1 | 1         |           |           |
|---|-----------|-----------|-----------|
| C | 2.268557  | -1.941666 | -0.682178 |
| C | 3.576013  | -2.374584 | -0.829729 |
| C | 4.639631  | -1.610925 | -0.294426 |
| H | 1.438681  | -2.517110 | -1.082624 |
| H | 3.799818  | -3.299123 | -1.350761 |
| H | 5.662928  | -1.960081 | -0.407933 |
| N | 2.823184  | 1.099524  | 1.116292  |
| C | 3.228234  | -0.066948 | 0.497190  |
| C | 2.064280  | -0.739358 | 0.024986  |
| C | 0.941862  | 0.059216  | 0.389729  |
| C | 0.113932  | 2.177386  | -0.786378 |
| C | 0.733858  | 1.797394  | -2.088200 |
| C | 0.260234  | 3.609792  | -0.393350 |
| C | -1.006522 | 1.369086  | -0.184496 |
| C | -2.361742 | 1.384250  | -0.931863 |
| C | -3.358118 | 0.507551  | -0.138751 |
| C | -2.885846 | -0.932043 | 0.189991  |
| C | -1.461821 | -0.890542 | 0.863376  |
| C | -0.494974 | -0.072283 | -0.030282 |
| H | -2.225541 | 1.005810  | -1.950371 |
| H | -2.756957 | 2.403470  | -1.006440 |
| H | -4.304497 | 0.456328  | -0.687407 |
| H | -3.585879 | 1.012992  | 0.807558  |
| C | -3.894263 | -1.591539 | 1.159551  |
| C | -2.770422 | -1.838667 | -1.027649 |
| N | -1.493850 | -0.317585 | 2.170577  |
| H | -1.093455 | -1.918046 | 0.966752  |
| H | -1.193628 | 1.774157  | 0.817471  |
| H | -0.525089 | -0.564777 | -1.009374 |
| C | -3.252705 | -1.635273 | -2.254678 |
| C | -1.482472 | 0.219062  | 3.220959  |
| H | 0.635419  | 0.741831  | -2.341035 |
| H | 0.230228  | 2.383048  | -2.875680 |
| H | 1.789522  | 2.087299  | -2.127006 |
| H | 1.270376  | 3.992478  | -0.566734 |
| H | -0.407219 | 4.189964  | -1.055000 |
| H | -0.052905 | 3.812961  | 0.633174  |
| H | -3.590975 | -2.614272 | 1.410125  |
| H | -3.980628 | -1.024501 | 2.091228  |
| H | -4.880813 | -1.642844 | 0.689828  |
| H | -2.289309 | -2.797262 | -0.820201 |
| H | -3.164940 | -2.399847 | -3.021075 |
| H | -3.776274 | -0.728924 | -2.546081 |
| C | 1.457045  | 1.187368  | 1.063295  |
| H | 0.935944  | 1.898941  | 1.685868  |
| H | 3.446615  | 1.716657  | 1.620351  |
| N | 4.489239  | -0.455198 | 0.359243  |

17-F

| 1 | 1         |           |           |
|---|-----------|-----------|-----------|
| C | 2.350018  | -2.200262 | -0.385221 |
| C | 3.665097  | -2.532372 | -0.570828 |
| C | 4.689396  | -1.549206 | -0.356706 |
| H | 1.552952  | -2.924980 | -0.517246 |
| H | 3.959253  | -3.534707 | -0.861659 |
| H | 5.729511  | -1.844833 | -0.480801 |
| N | 2.774153  | 1.286791  | 0.433979  |
| C | 3.200200  | 0.046657  | 0.151412  |
| C | 2.069459  | -0.858280 | 0.015767  |
| C | 0.936755  | -0.110565 | 0.260906  |
| C | 0.315796  | 2.194458  | -0.150718 |
| C | 0.658033  | 2.284759  | -1.645748 |
| C | 0.236731  | 3.596198  | 0.464707  |
| C | -0.953776 | 1.329613  | 0.157283  |
| C | -2.289143 | 1.578678  | -0.539192 |
| C | -3.328121 | 0.578791  | 0.024938  |
| C | -2.926434 | -0.921363 | -0.005884 |
| C | -1.492559 | -1.126596 | 0.621346  |
| C | -0.516897 | -0.141620 | -0.067806 |
| H | -2.181694 | 1.464839  | -1.623447 |
| H | -2.644918 | 2.598890  | -0.355137 |
| H | -4.280945 | 0.694344  | -0.501922 |
| H | -3.529765 | 0.847464  | 1.069397  |
| C | -3.955922 | -1.744379 | 0.802851  |
| C | -2.868340 | -1.517235 | -1.405356 |
| N | -1.463041 | -0.921717 | 2.032922  |
| H | -1.182466 | -2.162553 | 0.438603  |
| H | -1.130342 | 1.443988  | 1.236953  |
| H | -0.588959 | -0.382886 | -1.140326 |
| C | -3.311285 | -0.985930 | -2.546612 |
| C | -1.413258 | -0.715225 | 3.193674  |
| H | 0.728677  | 1.306408  | -2.133423 |
| H | -0.112149 | 2.859923  | -2.168636 |
| H | 1.610785  | 2.802054  | -1.798142 |
| H | 1.175833  | 4.145852  | 0.333082  |
| H | -0.548683 | 4.180499  | -0.025847 |
| H | 0.007367  | 3.558001  | 1.535876  |
| H | -3.707068 | -2.811793 | 0.796473  |
| H | -4.002248 | -1.411333 | 1.843891  |
| H | -4.948682 | -1.631532 | 0.357813  |
| H | -2.471274 | -2.534757 | -1.437041 |
| H | -3.272252 | -1.549504 | -3.474308 |
| H | -3.752090 | 0.004634  | -2.609406 |
| C | 1.340513  | 1.275105  | 0.632059  |
| H | 1.131612  | 1.426386  | 1.706037  |
| H | 3.405384  | 2.033407  | 0.701245  |
| N | 4.490969  | -0.288668 | -0.009368 |

## 18-T

|   |           |           |           |
|---|-----------|-----------|-----------|
| 1 | 1         |           |           |
| C | 3.699222  | -1.696206 | -0.369834 |
| C | 4.630212  | -0.810195 | 0.207259  |
| H | 5.685673  | -1.068129 | 0.199486  |
| C | 1.031869  | 1.666507  | 1.085804  |
| C | 0.706467  | 0.478806  | 0.409821  |
| C | 1.947559  | -0.215508 | 0.210682  |
| C | 2.974498  | 0.596699  | 0.759305  |
| N | 2.375680  | 1.734975  | 1.281971  |
| H | 0.375357  | 2.406471  | 1.519906  |
| C | -0.423981 | 2.080403  | -1.312766 |
| C | -1.410676 | 1.294147  | -0.506775 |
| C | -0.673880 | 0.039591  | -0.006316 |
| C | -2.722080 | 0.898878  | -1.239765 |
| C | -3.593136 | 0.077095  | -0.264180 |
| C | -2.904373 | -1.148022 | 0.387982  |
| C | -1.542217 | -0.705406 | 1.041074  |
| C | -0.376231 | 3.558510  | -1.180365 |
| C | 0.249106  | 1.495879  | -2.499914 |
| N | -1.735252 | 0.138994  | 2.176199  |
| C | -1.860809 | 0.899777  | 3.068608  |
| C | -2.582354 | -2.270395 | -0.589221 |
| C | -3.046339 | -2.441334 | -1.828243 |
| C | -3.832001 | -1.737489 | 1.475902  |
| H | -1.694275 | 1.902274  | 0.359687  |
| H | -0.574691 | -0.659904 | -0.843617 |
| H | -2.480647 | 0.318628  | -2.136129 |
| H | -3.272492 | 1.791333  | -1.557459 |
| H | -4.494917 | -0.254679 | -0.789851 |
| H | -3.938561 | 0.740457  | 0.537809  |
| H | -1.010037 | -1.599946 | 1.386215  |
| H | 0.598246  | 3.976560  | -1.449981 |
| H | -1.095118 | 3.958973  | -1.919855 |
| H | -0.696028 | 3.918859  | -0.200968 |
| H | 1.262946  | 1.890676  | -2.624041 |
| H | 0.267124  | 0.406537  | -2.516399 |
| H | -0.314811 | 1.836028  | -3.386896 |
| H | -1.947090 | -3.053288 | -0.168884 |
| H | -2.795652 | -3.330922 | -2.398673 |
| H | -3.712131 | -1.735713 | -2.317763 |
| H | -4.056050 | -0.999289 | 2.251770  |
| H | -4.772709 | -2.064759 | 1.023643  |
| H | -3.372899 | -2.608466 | 1.956781  |
| C | 2.342064  | -1.423858 | -0.389493 |
| H | 1.648948  | -2.129491 | -0.836501 |
| H | 2.875624  | 2.462210  | 1.776806  |
| N | 4.275884  | 0.346694  | 0.770884  |
| F | 4.158055  | -2.830703 | -0.913983 |

## TS from 18-T to 18-H

|   |           |           |           |
|---|-----------|-----------|-----------|
| 1 | 1         |           |           |
| C | -3.457807 | -0.912159 | -0.577348 |
| C | -4.348823 | 0.137622  | -0.371103 |
| H | -5.410401 | -0.067117 | -0.274102 |
| C | -0.642764 | 2.595261  | -0.327166 |
| C | -0.410646 | 1.230549  | -0.548965 |
| C | -1.676010 | 0.649295  | -0.658326 |
| C | -2.667098 | 1.644260  | -0.439808 |
| N | -1.984099 | 2.845633  | -0.299370 |
| H | 0.063358  | 3.397316  | -0.163807 |
| C | -0.831468 | -1.347903 | 0.994099  |
| C | 0.536851  | -0.674838 | 0.804974  |
| C | 0.762613  | 0.318387  | -0.429283 |
| C | 1.700268  | -1.700632 | 0.811901  |
| C | 3.073485  | -1.010988 | 0.862512  |
| C | 3.325213  | 0.001180  | -0.273221 |
| C | 2.136439  | 1.018785  | -0.298232 |
| C | -1.626994 | -0.818265 | 2.156199  |
| C | -0.972398 | -2.829670 | 0.762350  |
| N | 2.135135  | 1.864206  | 0.858075  |
| C | 2.108949  | 2.539840  | 1.824675  |
| C | 3.409903  | -0.622817 | -1.660059 |
| C | 3.627516  | -1.901736 | -1.969856 |
| C | 4.653580  | 0.752513  | -0.026277 |
| H | 0.646550  | -0.021729 | 1.679662  |
| H | 0.826779  | -0.306606 | -1.329058 |
| H | 1.635171  | -2.337502 | -0.075408 |
| H | 1.609527  | -2.355721 | 1.685472  |
| H | 3.857068  | -1.776309 | 0.853579  |
| H | 3.177356  | -0.486332 | 1.820253  |
| H | 2.263328  | 1.672226  | -1.170616 |
| H | -2.635154 | -1.235074 | 2.208905  |
| H | -1.095679 | -1.124578 | 3.071568  |
| H | -1.668862 | 0.274174  | 2.172612  |
| H | -2.021245 | -3.132432 | 0.725813  |
| H | -0.461158 | -3.184358 | -0.134970 |
| H | -0.518216 | -3.345980 | 1.621856  |
| H | 3.357450  | 0.099914  | -2.477402 |
| H | 3.744492  | -2.212097 | -3.004040 |
| H | 3.727770  | -2.685315 | -1.223582 |
| H | 4.644483  | 1.278347  | 0.933190  |
| H | 5.483238  | 0.039767  | -0.023817 |
| H | 4.848258  | 1.486241  | -0.816778 |
| C | -2.057331 | -0.712063 | -0.717925 |
| H | -1.489735 | -1.442093 | -1.285187 |
| H | -2.417793 | 3.745291  | -0.135479 |
| N | -3.956853 | 1.432917  | -0.308552 |
| F | -3.931859 | -2.157673 | -0.658286 |

## 18-H

|   |           |           |           |
|---|-----------|-----------|-----------|
| 1 | 1         |           |           |
| C | -3.472545 | -0.805093 | -0.207157 |
| C | -4.321594 | 0.270726  | -0.084723 |
| H | -5.380053 | 0.110245  | 0.089489  |
| C | -0.605843 | 2.677296  | -0.520961 |
| C | -0.402696 | 1.266810  | -0.597509 |
| C | -1.656669 | 0.720744  | -0.538935 |
| C | -2.629728 | 1.748396  | -0.392228 |
| N | -1.920898 | 2.955628  | -0.420486 |
| H | 0.124700  | 3.475309  | -0.512078 |
| C | -0.945575 | -1.550362 | 0.385377  |
| C | 0.432681  | -0.762523 | 0.538579  |
| C | 0.777041  | 0.340531  | -0.530933 |
| C | 1.630564  | -1.724462 | 0.686795  |
| C | 2.949888  | -0.991260 | 0.976527  |
| C | 3.314961  | 0.084921  | -0.066459 |
| C | 2.106963  | 1.067627  | -0.199208 |
| C | -1.518155 | -1.758018 | 1.802383  |
| C | -0.803133 | -2.912902 | -0.320654 |
| N | 1.926644  | 1.857171  | 0.984616  |
| C | 1.732022  | 2.500806  | 1.953793  |
| C | 3.602980  | -0.460170 | -1.459327 |
| C | 3.915772  | -1.711345 | -1.798772 |
| C | 4.571602  | 0.862104  | 0.389379  |
| H | 0.341434  | -0.203438 | 1.478680  |
| H | 0.924716  | -0.138929 | -1.508679 |
| H | 1.737087  | -2.319633 | -0.224155 |
| H | 1.435697  | -2.427760 | 1.504527  |
| H | 3.763729  | -1.720999 | 1.047763  |
| H | 2.891953  | -0.508472 | 1.960051  |
| H | 2.328537  | 1.771040  | -1.013130 |
| H | -2.415545 | -2.383271 | 1.788332  |
| H | -0.778275 | -2.264767 | 2.430306  |
| H | -1.761972 | -0.804793 | 2.285207  |
| H | -1.788747 | -3.367288 | -0.462096 |
| H | -0.329599 | -2.820933 | -1.305282 |
| H | -0.208028 | -3.608101 | 0.275874  |
| H | 3.626567  | 0.302962  | -2.240922 |
| H | 4.179094  | -1.961745 | -2.822301 |
| H | 3.950202  | -2.528825 | -1.083910 |
| H | 4.420122  | 1.331214  | 1.366262  |
| H | 5.419412  | 0.175020  | 0.462487  |
| H | 4.839795  | 1.645368  | -0.329145 |
| C | -2.013858 | -0.697620 | -0.495189 |
| H | -1.902211 | -1.108276 | -1.516711 |
| H | -2.331309 | 3.877225  | -0.320476 |
| N | -3.897247 | 1.574376  | -0.162677 |
| F | -3.981652 | -2.025402 | -0.142770 |

## TS from 18-T to 18-F

|   |           |           |           |
|---|-----------|-----------|-----------|
| 1 | 1         |           |           |
| C | 2.336138  | -1.549912 | -0.257633 |
| C | 3.695698  | -1.773875 | -0.310799 |
| C | 4.632371  | -0.793310 | 0.095680  |
| H | 1.636959  | -2.318847 | -0.569441 |
| H | 5.693111  | -1.024566 | 0.041200  |
| N | 2.379105  | 1.799527  | 1.010547  |
| C | 2.971523  | 0.621988  | 0.605288  |
| C | 1.939155  | -0.291953 | 0.243480  |
| C | 0.700268  | 0.372288  | 0.457105  |
| C | -0.334813 | 2.195753  | -0.998964 |
| C | 0.403918  | 1.754284  | -2.218622 |
| C | -0.435227 | 3.674334  | -0.807652 |
| C | -1.370514 | 1.311533  | -0.347491 |
| C | -2.669327 | 1.043939  | -1.143227 |
| C | -3.583382 | 0.142589  | -0.280919 |
| C | -2.943015 | -1.163466 | 0.256156  |
| C | -1.576253 | -0.840013 | 0.971235  |
| C | -0.680790 | -0.014981 | 0.011838  |
| H | -2.426029 | 0.564218  | -2.097094 |
| H | -3.193083 | 1.980044  | -1.366673 |
| H | -4.480883 | -0.110438 | -0.855054 |
| H | -3.931513 | 0.726885  | 0.579474  |
| C | -3.907259 | -1.826691 | 1.267229  |
| C | -2.640389 | -2.193929 | -0.823027 |
| N | -1.753977 | -0.115880 | 2.188517  |
| H | -1.081751 | -1.785481 | 1.223486  |
| H | -1.668661 | 1.803383  | 0.586583  |
| H | -0.593159 | -0.626430 | -0.894306 |
| C | -3.071075 | -2.215626 | -2.085429 |
| C | -1.870664 | 0.545732  | 3.158185  |
| H | 0.475463  | 0.672620  | -2.332814 |
| H | -0.136923 | 2.152172  | -3.093233 |
| H | 1.406286  | 2.194233  | -2.258672 |
| H | 0.511281  | 4.188531  | -0.998501 |
| H | -1.147179 | 4.044488  | -1.565932 |
| H | -0.832260 | 3.959741  | 0.169255  |
| H | -3.485772 | -2.757113 | 1.663938  |
| H | -4.119494 | -1.162617 | 2.110429  |
| H | -4.850784 | -2.073650 | 0.771967  |
| H | -2.053386 | -3.044517 | -0.468937 |
| H | -2.840240 | -3.052733 | -2.737792 |
| H | -3.688669 | -1.433176 | -2.517652 |
| C | 1.015469  | 1.667225  | 0.931192  |
| H | 0.376847  | 2.362569  | 1.455149  |
| H | 2.884930  | 2.571483  | 1.425194  |
| N | 4.282532  | 0.409914  | 0.543327  |
| F | 4.168923  | -2.942352 | -0.756563 |

**18-F**

1 1

|   |           |           |           |
|---|-----------|-----------|-----------|
| C | 2.455762  | -1.675270 | -0.154093 |
| C | 3.810081  | -1.780138 | -0.287215 |
| C | 4.676843  | -0.645182 | -0.126317 |
| H | 1.809672  | -2.540520 | -0.252763 |
| H | 5.749549  | -0.808692 | -0.214454 |
| N | 2.306073  | 1.885053  | 0.425455  |
| C | 2.929248  | 0.713033  | 0.239956  |
| C | 1.964201  | -0.369795 | 0.147402  |
| C | 0.719334  | 0.202507  | 0.316568  |
| C | -0.245247 | 2.344289  | -0.276003 |
| C | 0.126885  | 2.385296  | -1.765989 |
| C | -0.564604 | 3.753923  | 0.234306  |
| C | -1.370122 | 1.309346  | 0.068095  |
| C | -2.705881 | 1.293114  | -0.670821 |
| C | -3.590021 | 0.180100  | -0.056468 |
| C | -2.954448 | -1.234560 | 0.029912  |
| C | -1.527095 | -1.163276 | 0.699835  |
| C | -0.698438 | -0.084609 | -0.040521 |
| H | -2.548610 | 1.124575  | -1.741759 |
| H | -3.224485 | 2.253130  | -0.567535 |
| H | -4.531917 | 0.104883  | -0.609578 |
| H | -3.864747 | 0.483866  | 0.961353  |
| C | -3.865190 | -2.155066 | 0.875284  |
| C | -2.757499 | -1.907800 | -1.320953 |
| N | -1.574888 | -0.857959 | 2.092513  |
| H | -1.051203 | -2.146300 | 0.600306  |
| H | -1.596195 | 1.467293  | 1.132924  |
| H | -0.697550 | -0.408625 | -1.093641 |
| C | -3.242350 | -1.533834 | -2.506788 |
| C | -1.594183 | -0.563969 | 3.235198  |
| H | 0.368425  | 1.399960  | -2.179140 |
| H | -0.708246 | 2.790717  | -2.345219 |
| H | 0.988630  | 3.038714  | -1.936356 |
| H | 0.279987  | 4.436224  | 0.084327  |
| H | -1.414952 | 4.170507  | -0.315434 |
| H | -0.821690 | 3.752777  | 1.299816  |
| H | -3.449526 | -3.166320 | 0.951859  |
| H | -3.997263 | -1.763090 | 1.888078  |
| H | -4.848458 | -2.234415 | 0.402823  |
| H | -2.203348 | -2.848191 | -1.270368 |
| H | -3.084687 | -2.146053 | -3.390003 |
| H | -3.832775 | -0.633696 | -2.650499 |
| C | 0.887083  | 1.656270  | 0.593819  |
| H | 0.624079  | 1.849089  | 1.649004  |
| H | 2.802816  | 2.738861  | 0.653357  |
| N | 4.265151  | 0.579692  | 0.127557  |
| F | 4.394667  | -2.945386 | -0.554114 |



## References

- (1) Khatri, Y.; Hohlman, R.M.; Mendoza, J.; Li, S.; Lowell, A.N.; Asahara, H.; Sherman, D.H. Multicomponent Microscale Biosynthesis of Unnatural Cyanobacterial Indole Alkaloids. *ACS Syn. Biol.* **2020**, *9* (6), 1349-1360. [10.1021/acssynbio.0c00038](https://doi.org/10.1021/acssynbio.0c00038)
- (2) Schrödinger Release 2017-2: MacroModel. Schrödinger, LLC: New York, NY 2017.
- (3) Frisch, M. J.; Trucks, G. W.; Schlegel, H. B.; Scuseria, G. E.; Robb, M. A.; Cheeseman, J. R.; Scalmani, G.; Barone, V.; Mennucci, B.; Petersson, G. A.; Nakatsuji, H.; Caricato, M.; Li, X.; Hratchian, H. P.; Izmaylov, A. F.; Bloino, J.; Zheng, G.; Sonnenberg, J. L.; Hada, M.; Ehara, M.; Toyota, K.; Fukuda, R.; Hasegawa, J.; Ishida, M.; Nakajima, T.; Honda, Y.; Kitao, O.; Nakai, H.; Vreven, T.; Montgomery, Jr., J. A.; Peralta, J. E.; Ogliaro, F.; Bearpark, M.; Heyd, J. J.; Brothers, E.; Kudin, K. N.; Staroverov, V. N.; Keith, T.; Kobayashi, R.; Normand, J.; Raghavachari, K.; Rendell, A.; Burant, J. C.; Iyengar, S. S.; Tomasi, J.; Cossi, M.; Rega, N.; Millam, J. M.; Klene, M.; Knox, J. E.; Cross, J. B.; Bakken, V.; Adamo, C.; Jaramillo, J.; Gomperts, R.; Stratmann, R. E.; Yazyev, O.; Austin, A. J.; Cammi, R.; Pomelli, C.; Ochterski, J. W.; Martin, R. L.; Morokuma, K.; Zakrzewski, V. G.; Voth, G. A.; Salvador, P.; Dannenberg, J. J.; Dapprich, S.; Daniels, A. D.; Farkas, O.; Foresman, J. B.; Ortiz, J. V.; Cioslowski, J.; Fox, D. J. Gaussian 09 Revision D.01. Gaussian Inc.: Wallingford, CT 2013.
- (4) Becke, A. D. Density-functional Thermochemistry. III. The Role of Exact Exchange. *J. Chem. Phys.* **1993**, *98* (7), 5648–5652. <https://doi.org/10.1063/1.464913>.
- (5) Lee, C.; Yang, W.; Parr, R. G. Development of the Colle-Salvetti Correlation-Energy Formula into a Functional of the Electron Density. *Phys. Rev. B* **1988**, *37* (2), 785–789. <https://doi.org/10.1103/PhysRevB.37.785>.
- (6) Grimme, S.; Antony, J.; Ehrlich, S.; Krieg, H. A Consistent and Accurate Ab Initio Parametrization of Density Functional Dispersion Correction (DFT-D) for the 94 Elements H-Pu. *J. Chem. Phys.* **2010**, *132* (15), 154104. <https://doi.org/10.1063/1.3382344>.
- (7) Grimme, S.; Ehrlich, S.; Goerigk, L. Effect of the Damping Function in Dispersion Corrected Density Functional Theory. *J. Comput. Chem.* **2011**, *32* (7), 1456–1465. <https://doi.org/10.1002/jcc.21759>.
- (8) Miertuš, S.; Scrocco, E.; Tomasi, J. Electrostatic Interaction of a Solute with a Continuum. A Direct Utilizaion of Ab Initio Molecular Potentials for the Prevision of Solvent Effects. *Chem. Phys.* **1981**, *55* (1), 117–129. [https://doi.org/10.1016/0301-0104\(81\)85090-2](https://doi.org/10.1016/0301-0104(81)85090-2).
- (9) Miertuš, S.; Tomasi, J. Approximate Evaluations of the Electrostatic Free Energy and Internal

Energy Changes in Solution Processes. *Chem. Phys.* **1982**, 65 (2), 239–245.

[https://doi.org/10.1016/0301-0104\(82\)85072-6](https://doi.org/10.1016/0301-0104(82)85072-6).

- (10) Pascual-ahuir, J. L.; Silla, E.; Tuñon, I. GEPOL: An Improved Description of Molecular Surfaces. III. A New Algorithm for the Computation of a Solvent-Excluding Surface. *J. Comput. Chem.* **1994**, 15 (10), 1127–1138. <https://doi.org/10.1002/jcc.540151009>.
